# Supplementary material
Source: publisher figshare collection journal article supplement (https://diabetesjournals.figshare.com/articles/dataset/_/20497188)
Supplement: Supplementary file 1 [file 5]

## Sheet: Index
Index of Supplementary Tables 1–20
Table	Content
ST1	QC of MetS components GWAS
ST2	LD Score regression estimates of MetS components
ST3	LD Score regression estimates of genetic correlations between MetS components
ST4	Genomic SEM confirmatory factor model
ST5	Summary statistics and functional annotation of lead SNPs resulting from MetS factor GWAS
ST6	Comparison with GWAS loci of Lind et al. (2019)
ST7	Genes implicated by FUMA positional mapping, eQTL or chromatin interaction mapping of significant MetS factor GWAS SNPs
ST8	MAGMA gene-based analysis of MetS factor SNPs
ST9	Overlap between FUMA positional mapping, FUMA eQTL mapping, FUMA chromatin interaction mapping and MAGMA gene-based analysis of MetS factor SNPs
ST10	MAGMA gene-set analysis of MetS factor
ST11	MAGMA detailed tissue analysis of MetS factor
ST12	Mouse cell type analysis of MetS factor
ST13	Human brain cell type analysis of MetS factor
ST14	Overlap between Genomic Risk loci associated with the MetS factor, the MetS components, and the MetS GWAS by Lind
ST15	Overlapping and unique genes associated with the MetS factor, the MetS components, and the MetS GWAS by Lind mapped by MAGMA gene-based analysis
ST16	Overlapping and unique gene-sets associated with the MetS factor, the MetS components, and the MetS GWAS by Lind
ST17	Overlapping and unique tissues associated with the MetS factor, the MetS components, and the MetS GWAS by Lind
ST18	Overlapping and unique mouse cell types associated with the MetS factor, the MetS components and the MetS GWAS by Lind
ST19	Overlapping and unique human brain cell types associated with the MetS factor, the MetS components, and the MetS GWAS by Lind
ST20	Overlap between Genomic Risk loci associated with the MetS factor without and with waist circumference
ST21	Overlapping and unique genes associated with the MetS factor without and with waist circumference
ST22	Overlapping and unique gene-sets associated with the MetS factor without and with waist circumference
ST23	Overlapping and unique tissues associated with the MetS factor without and with waist circumference
ST24	Overlapping and unique mouse cell types associated with the MetS factor without and with waist circumference
ST25	Overlapping and unique human brain cell types associated with the MetS factor without and with waist circumference
ST26	Genetic correlations between MetS factor and other traits and diseases
ST27	Polygenic prediction of MetS and indicator phenotypes with MetS factor GWAS, MetS components GWAS and the MetS GWAS by Lind
ST28	Comparison of variance explained by the MetS PRS versus the MetS components PRS combined, calculated with R's rms package
ST29	DRUGSET individual drug gene-set results
ST30	DRUGSET Anatomical Therapeutic Classification (ATC) III results
ST31	DRUGSET clinical indication results
ST32	DRUGSET mode of actions results

## Sheet: ST1
Supplementary Table 1. QC of MetS components GWAS. HRC, Haplotype Reference Consortium; MAF, minor allele frequency; PC, principal component; SNP, single nucleotide polymorphism; TDI, Townsend deprivation index
Cohort	Phenotype	N samples	N variants	Phenotypic quality control	Variant quality control	Covariates	Imputation panel	Reference
MAGIC	Fasting glucose	46186	2461105	individuals with known diabetes, those on anti-diabetic treatment, and those with fasting glucose ≥7 mmol/l were excluded.	MAF <0.01, Hardy-Weinberg equilibrium P < 10−4 or 10−6 and call-rate <0.95, poor imputation quality, ambiguous mapping/strand annotiation.	Age, sex, age2, study site (if applicable), geographical covariates (if applicable). Additional covariares differed per individual study.	HapMap CEU	Dupuis et al. (2010)24
Global Lipids Genetics Consortium	High density lipoprotein	99000	2692429	Individuals known to be on lipidlowering therapy were excluded from analysis for all studies except the Fenland, EPIC Norfolk, and EPIC Norfolk Obese cohorts; fewer than 2% of individuals in each of these studies were known to be on lipid-lowering medication.	Each study excluded SNPs with MAF < 0.01 and SNPs with poor imputation quality: Rsq < 0.3 (BIMBAM and MACH) or proper info < 0.3 (IMPUTE/SNPTEST).	Age, sex, age2. Additional covariares differed per individual study.	HapMap CEU	Teslovich et al (2010)25
UK Biobank	Systolic blood pressure	361402	10534620	NA	Imputed variants were converted to hard calls filtering by an imputation INFO score at 0.9 and excluding multi-allelic SNPs, indels, SNPs without unique rsID and SNPs with MAF <0.0001.	Age, sex, 20 PCs, array, assessment center and TDI.	1000G and HRC	Watanabe et al. (2017)26
Global Lipids Genetics Consortium	Triglycerides	96598	2692560	Individuals known to be on lipidlowering therapy were excluded from analysis for all studies except the Fenland, EPIC Norfolk, and EPIC Norfolk Obese cohorts; fewer than 2% of individuals in each of these studies were known to be on lipid-lowering medication.	Each study excluded SNPs with MAF < 0.01 and SNPs with poor imputation quality: Rsq < 0.3 (BIMBAM and MACH) or proper info < 0.3 (IMPUTE/SNPTEST).	Age, sex, age2. Additional covariares differed per individual study.	HapMap CEU	Teslovich et al (2010)25
UK Biobank	Waist circumference	385932	10599054	NA	Imputed variants were converted to hard calls filtering by an imputation INFO score at 0.9 and excluding multi-allelic SNPs, indels, SNPs without unique rsID and SNPs with MAF <0.0001.	Age, sex, 20 PCs, array, assessment center and TDI.	1000G and HRC	Watanabe et al. (2017)26

## Sheet: ST2
Supplementary Table 2. LD Score regression estimates of indicator phenotypes, the MetS factor and the MetS GWAS by Lind. A ratio of <0 indicates genomic control. MetS, metabolic syndrome; N, number; SE, standard error
Phenotype	N variants	h2 (SE)	h2 z-score	λGC	Mean χ2	Intercept (SE)	Ratio (SE)*
Fasting glucose	978320	0.093 (0.020)	4.65	1.0496	1.0774	0.992 (0.009)	< 0
High density lipoprotein	952609	0.112 (0.020)	5.6	1.0195	1.1547	0.927 (0.043)	< 0
Systolic blood pressure	981398	0.133 (0.005)	26.6	1.7334	2.064	1.100 (0.016)	0.094 (0.015)
Triglycerides	984006	0.150 (0.026)	5.76923	1.0075	1.1556	0.864 (0.015)	< 0
Waist circumference	981398	0.198 (0.008)	24.75	2.0684	2.5646	1.076 (0.018)	0.049 (0.012)
MetS factor	984006	0.135 (0.005)	27	1.797	2.183	0.967 (0.016)	< 0
MetS Lind	980948	0.092 (0.005)	18.4	1.442	1.587	1.060 (0.016)	0.101 (0.028)

## Sheet: ST3
Supplementary Table 3. LD Score regression estimates of genetic correlations between MetS components. RG, genetic correlation; SE, standard error
Phenotype I	Phenotype 2	RG	SE	P
Fasting glucose	High density lipoprotein	-0.2222	0.0721	0.0020538
Fasting glucose	Systolic blood pressure	0.2211	0.0421	1.5434e-07
Fasting glucose	Triglycerides	0.1393	0.0922	0.13105
Fasting glucose	Waist circumference	0.2636	0.0477	3.3013e-08
High density lipoprotein	Systolic blood pressure	-0.1185	0.0275	1.6533e-05
High density lipoprotein	Triglycerides	-0.6017	0.0688	2.3108e-18
High density lipoprotein	Waist circumference	-0.4298	0.0437	8.0116e-23
Systolic blood pressure	Triglycerides	0.1403	0.0266	1.3299e-07
Systolic blood pressure	Waist circumference	0.1371	0.0179	1.7875e-14
Triglycerides	Waist circumference	0.3086	0.0394	4.403e-15

## Sheet: ST4
Supplementary Table 4. Genomic SEM confirmatory factor model
Model fit statistics
χ2	df	χ2 P	AIC	CFI	SRMR
28.423	5	3.009e-05	48.423	0.952	0.058
Factor	Item	Unstandardised loading	Unstandardised SE	Standardised loading	Standardised SE	P
F1	Fasting glucose	0.128257	0.0161729	0.452914	0.0571112	2.18481e-15
F1	HDL	-0.234271	0.0141865	-0.700324	0.0424087	2.9245e-61
F1	Systolic blood pressure	0.0813104	0.00858232	0.222614	0.0234969	2.68891e-21
F1	Triglycerides	0.204567	0.0146616	0.62437	0.0447493	3.03206e-44
F1	Waist circumference	0.25463	0.0173245	0.575689	0.0391687	6.67278e-49
Fasting glucose	Fasting glucose	0.0637427	0.0141744	0.79487	0.176754	6.89079e-06
HDL	HDL	0.0570198	0.0105231	0.509548	0.0940374	6.00831e-08
Systolic blood pressure	Systolic blood pressure	0.126798	0.0053349	0.950443	0.0399888	7.20573e-125
Triglycerides	Triglycerides	0.0654987	0.0128028	0.610162	0.119267	3.12175e-07
Waist circumference	Waist circumference	0.130798	0.00937462	0.668582	0.0479191	3.04497e-44

## Sheet: ST5
Supplementary Table 5. Summary statistics and functional annotation of lead SNPs resulting from MetS factor GWAS. Lead SNPs are those SNPs that are genome-wide significant (p < 5e-8) and are independent of each other (r2 < 0.1). A1 is the effect allele, A2 is the non-effect (reference) alelle. Annovar, functional variant classification based on genomic position; CADD = PHRED-scaled Combined Annot…
Genomic Locus	rsID	Chromosome	Position	P	A2	A1	Minor allele frequency 1000G	BETA	SE	Nearest gene	Distance to gene	Annovar	CADD	RDB	minChrState	commonChrState
199	rs1421085	16	53800954	5.07301e-152	C	T	0.4324	-0.062216	0.00236896	FTO	0	intronic	21.4	5	2	15
220	rs12967135	18	57849023	3.08792e-66	A	G	0.2396	-0.0457641	0.00266205	RP11-795H16.2	14764	intergenic	9.476	6	5	15
26	rs7601028	2	642499	1.0221e-52	G	C	0.174	-0.0462252	0.00302499	TMEM18	24835	intergenic	0.398	7	5	14
121	rs320	8	19819077	2.3024e-43	G	T	0.2873	0.0307208	0.00222496	LPL	0	intronic	13.8	4	4	15
21	rs545608	1	177899121	1.85541e-37	C	G	0.1859	-0.0380443	0.00297444	SEC16B:RP4-798P15.3	0	ncRNA_intronic	4.914	6	4	15
220	rs9956279	18	57942799	2.38877e-36	T	C	0.2833	-0.0309878	0.00246125	RP11-396N11.1	18584	intergenic	0.166	3a	14	15
197	rs8055138	16	28891465	1.86371e-35	T	C	0.329	-0.030298	0.00243807	ATP2A1	0	intronic	8.971	2b	1	2
198	rs3814883	16	29994922	7.26009e-31	T	C	0.4602	-0.0260472	0.00225489	TAOK2	0	exonic	5.488	NA	3	4
121	rs6999158	8	19928013	1.9236e-30	A	T	0.3062	0.0227706	0.00198568	AC100802.3	8802	intergenic	1.781	5	5	15
78	rs2307111	5	75003678	4.40814e-29	C	T	0.3956	0.0253371	0.00226364	POC5	0	exonic	15.77	5	4	5
121	rs7005359	8	19870693	3.55399e-28	G	A	0.2256	0.02461	0.00223595	LPL	45923	intergenic	0.814	5	5	15
198	rs11150604	16	31037020	3.91021e-28	T	A	0.3887	0.024349	0.00221396	STX4	7189	intergenic	5.562	6	2	15
121	rs7016529	8	19806631	1.9397e-27	C	T	0.01093	-0.101666	0.00936798	LPL	0	intronic	1.941	7	4	14
90	rs2814944	6	34552797	1.03148e-26	A	G	0.1372	-0.0339903	0.00317703	C6orf106	2267	intergenic	0.276	6	4	5
155	rs11826999	11	116553778	6.06856e-26	A	G	0.2227	-0.023377	0.00221934	AP000770.1	24808	intergenic	1.19	7	9	15
93	rs987237	6	50803050	7.81375e-26	G	A	0.1809	-0.0304854	0.00290076	TFAP2B	0	intronic	18.84	6	4	13
70	rs10938397	4	45182527	8.14195e-26	G	A	0.4205	-0.0234009	0.00222747	RP11-362I1.1	128857	intergenic	1.669	7	5	15
147	rs1013402	11	27712381	1.33998e-23	G	A	0.2903	-0.0245689	0.00245377	BDNF-AS:BDNF	0	ncRNA_intronic	15.09	NA	4	15
155	rs480823	11	116525730	3.12103e-22	C	T	0.1044	-0.0293861	0.0030306	AP000770.1	0	ncRNA_intronic	2.627	6	5	9
54	rs2526754	3	50125996	5.97774e-22	A	G	0.494	0.0217508	0.00225867	RBM6	0	intronic	8.381	NA	1	2
220	rs9947450	18	58052665	1.22145e-21	T	C	0.02982	0.062227	0.00651168	MC4R	12663	intergenic	2.262	7	9	15
132	rs1412239	9	28425515	2.39049e-21	G	C	0.3042	-0.0223765	0.00235878	LINGO2	0	intronic	4.548	5	14	15
216	rs891387	18	21103909	3.25308e-21	C	T	0.4732	0.0205946	0.00217834	C18orf8:NPC1	0	intronic	0.298	1f	2	4
200	rs4784745	16	57014875	4.00212e-21	G	A	0.329	-0.0190949	0.00202436	CETP	0	intronic	3.547	4	2	15
155	rs10047459	11	116721826	6.17929e-21	T	C	0.1899	0.0234451	0.00249764	APOA1-AS:SIK3	0	ncRNA_intronic	0.998	5	2	5
27	rs1042034	2	21225281	7.06823e-21	T	C	0.2177	-0.0200764	0.002142	APOB	0	exonic	8.152	NA	4	15
62	rs645040	3	135926622	1.31445e-20	T	G	0.2286	-0.0230622	0.00247794	RP11-463H24.1	1864	intergenic	10.37	4	2	15
150	rs7928842	11	47566352	2.30376e-20	C	T	0.4225	-0.0199655	0.00215908	CELF1	0	intronic	0.441	6	4	5
63	rs13322435	3	156795468	6.59582e-20	G	A	0.4066	0.0200764	0.00219797	LINC00880	3987	intergenic	0.199	4	2	15
129	rs10808546	8	126495818	4.55617e-19	T	C	0.4314	0.0158751	0.00177921	RP11-136O12.2	0	ncRNA_intronic	0.736	5	5	15
200	rs1138429	16	56942921	1.42103e-18	T	A	0.1014	-0.0284379	0.00323315	SLC12A3	0	intronic	5.836	5	2	15
202	rs6499240	16	69686912	1.52126e-18	G	A	0.4225	-0.020163	0.00229435	NFAT5	0	intronic	1.181	6	4	4
7	rs4660208	1	39722214	2.84445e-18	G	A	0.1948	-0.022772	0.00261222	MACF1:RP11-420K8.1	0	ncRNA_intronic	5.352	5	4	4
33	rs6545714	2	59307725	3.14581e-18	A	G	0.3817	0.019027	0.00218549	LINC01122	16823	intergenic	10.54	3a	7	15
186	rs938875	15	67952922	3.72302e-18	G	A	0.4076	-0.0191222	0.00220125	MAP2K5	0	intronic	2.786	7	4	5
199	rs13333228	16	53793798	4.53668e-18	C	T	0.2903	-0.0208157	0.00240242	FTO	0	intronic	4.56	6	5	15
77	rs9686661	5	55861786	4.64903e-18	T	C	0.1859	-0.0226813	0.00261859	AC022431.2	0	intronic	4.341	4	2	15
88	rs2066295	6	26168903	5.7329e-18	G	A	0.2187	0.0226925	0.00262713	HIST1H2BD	0	intronic	1.465	6	5	5
110	rs13244268	7	72911843	9.16922e-18	C	T	0.1143	0.024325	0.00283379	BAZ1B	0	intronic	8.812	6	4	4
155	rs180360	11	116598988	1.0076e-17	G	A	0.2724	0.0185363	0.00216216	BUD13	19897	intergenic	0.882	NA	5	14
28	rs11676272	2	25141538	1.04755e-17	G	A	0.4642	-0.0196291	0.00229082	ADCY3	0	exonic	12.07	1f	1	7
176	rs7144011	14	79940383	1.71228e-17	T	G	0.2068	-0.0228031	0.00267899	NRXN3	0	intronic	8.723	3a	5	15
228	rs3810291	19	47569003	2.74307e-17	A	G	0.337	-0.0191739	0.00226722	ZC3H4	0	UTR3	2.05	5	4	4
193	rs2531995	16	4013467	2.80443e-17	T	C	0.3867	-0.0188369	0.00222805	ADCY9	0	UTR3	5.274	NA	2	7
214	rs7212293	17	65847325	4.0479e-17	G	A	0.2157	-0.0220869	0.0026258	BPTF	0	intronic	0.092	5	1	5
33	rs4671328	2	58935282	9.128e-17	G	T	0.4304	0.0182456	0.00219414	LINC01122	0	ncRNA_intronic	0.584	6	5	15
200	rs1366544	16	56964719	2.49188e-16	A	G	0.1501	0.0218895	0.00267086	HERPUD1	1240	intergenic	3.089	NA	1	15
79	rs3814424	5	87968953	2.54894e-16	T	C	0.172	-0.0245532	0.00299687	LINC00461	0	ncRNA_exonic	12.18	4	1	13
111	rs17207196	7	75101065	2.68221e-16	T	C	0.4443	0.0177207	0.00216454	POM121C	0	intronic	2.402	5	4	5
196	rs7186893	16	24806420	3.03705e-16	T	G	0.2674	0.0197475	0.00241653	TNRC6A	0	intronic	1.687	7	4	4
138	rs7075195	10	65050659	5.31474e-16	G	A	0.4354	0.0165051	0.00203664	JMJD1C	0	intronic	3.395	6	5	15
93	rs2635727	6	50820940	7.08694e-16	C	T	0.2495	-0.0207207	0.00256793	RPS17P5	4027	intergenic	0.866	5	12	14
79	rs6870983	5	87697533	1.65814e-15	T	C	0.2356	0.0203605	0.00255639	TMEM161B-AS1	0	ncRNA_intronic	19.6	5	1	15
19	rs17024393	1	110154688	1.95859e-15	C	T	0.0328	-0.0476347	0.00599636	GNAT2	0	intronic	6.551	5	5	5
121	rs13263508	8	19942181	3.66025e-15	T	G	0.4235	0.0149159	0.00189624	AC100802.3	0	ncRNA_intronic	1.199	6	5	15
126	rs1431659	8	73439070	4.48189e-15	G	A	0.2783	0.0189815	0.00242091	KCNB2	10555	intergenic	2.639	NA	13	15
173	rs8015400	14	25930988	8.13332e-15	A	C	0.3479	-0.0177396	0.00228441	RP11-388G3.1	29547	intergenic	2.345	5	5	15
160	rs7132908	12	50263148	9.06931e-15	A	G	0.3569	-0.0185431	0.00239215	FAIM2	0	UTR3	19.54	4	2	7
61	rs3749262	3	131624097	1.11546e-14	A	G	0.2634	-0.0187614	0.00242855	CPNE4	0	intronic	10.61	6	5	15
200	rs12596776	16	56919348	1.33096e-14	G	C	0.1133	0.0234983	0.00305061	SLC12A3	0	intronic	7.644	2b	4	15
184	rs261336	15	58742418	2.0732e-14	A	G	0.161	-0.019626	0.00256683	ALDH1A2:LIPC:RP11-355N15.1	0	ncRNA_intronic	0.507	NA	5	15
25	rs10779835	1	230299949	2.4523e-14	C	T	0.3907	0.0153201	0.00200935	GALNT2	0	intronic	4.301	7	2	15
147	rs4923456	11	27609127	3.27248e-14	T	C	0.2495	-0.0189408	0.00249646	BDNF-AS	0	ncRNA_intronic	0.38	6	5	15
149	rs4755720	11	43628749	4.50422e-14	T	C	0.3996	0.0164941	0.00218594	HSD17B12	0	NA	7.526	6	13	14
152	rs687672	11	65649984	5.91567e-14	C	T	0.1889	0.0213915	0.00284843	CTSW	0	exonic	0.308	5	3	4
150	rs10769254	11	47362465	6.74678e-14	C	G	0.1819	0.0197177	0.00263158	MYBPC3	0	intronic	5.169	1f	4	15
192	rs2516740	16	2097110	7.49506e-14	C	A	0.2256	0.0201783	0.00269804	NTHL1	0	intronic	7.517	NA	1	2
221	rs12981256	19	1865901	7.7543e-14	A	G	0.4751	-0.0160304	0.0021447	KLF16	2333	intergenic	4.124	5	1	5
90	rs7742369	6	34165721	1.19546e-13	G	A	0.175	-0.0210165	0.00283345	KRT18P9	6864	intergenic	4.298	4	5	15
128	rs3808436	8	116560967	1.58009e-13	G	A	0.4324	0.0155821	0.00211133	TRPS1	0	intronic	15.33	6	4	15
97	rs2253310	6	108888593	1.94028e-13	G	C	0.4334	-0.0161393	0.00219497	FOXO3	0	intronic	3.251	5	1	6
225	rs17513613	19	30286822	1.9413e-13	C	T	0.2893	-0.0174504	0.00237331	CCNE1	15982	intergenic	14.53	5	2	15
223	rs12608504	19	18389135	2.26875e-13	G	A	0.3588	0.0162954	0.00222253	JUND	1427	intergenic	0.523	4	1	3
199	rs6499653	16	53877592	2.40036e-13	C	T	0.2296	0.0191521	0.00261485	FTO	0	intronic	0.882	7	4	5
12	rs1460940	1	72814617	2.88664e-13	A	G	0.1819	-0.0203189	0.00278357	RPL31P12	47104	intergenic	3.262	NA	15	15
233	rs17806379	20	51107290	3.63872e-13	T	C	0.1849	0.020343	0.00279884	RP4-723E3.1:RP5-1022J11.2	0	ncRNA_intronic	1.347	4	2	15
220	rs11152214	18	57854144	4.41086e-13	C	A	0.1243	0.023806	0.00328708	RP11-795H16.2	9643	intergenic	5.323	7	5	15
26	rs12999373	2	663483	4.75988e-13	A	G	0.2843	0.0169734	0.00234699	TMEM18	3851	intergenic	0.353	5	4	5
226	rs4805758	19	32866424	5.55276e-13	A	G	0.162	0.0203308	0.0028194	ZNF507	0	intronic	0.504	5	3	5
168	rs7982447	13	54453811	6.74725e-13	C	T	0.1998	-0.0191272	0.00266231	LINC00558	3556	intergenic	12.92	6	9	15
219	rs7241918	18	47160953	7.52047e-13	T	G	0.163	0.0181	0.00252454	SMUG1P1	15766	intergenic	0.365	7	5	15
227	rs10423928	19	46182304	8.48704e-13	A	T	0.2137	0.019566	0.00273534	GIPR	0	intronic	5.832	5	5	13
137	rs7084454	10	21821274	9.04109e-13	A	G	0.338	-0.0162969	0.00228108	MLLT10	1819	intergenic	11.8	5	1	5
148	rs2065418	11	30422068	1.39125e-12	G	T	0.3539	0.0158728	0.00224037	MPPED2	0	intronic	7.975	NA	5	15
91	rs2436726	6	40366427	2.24002e-12	T	C	0.4046	-0.015505	0.00220911	LRFN2	0	intronic	12.29	NA	1	15
14	rs17391694	1	78623626	2.39351e-12	T	C	0.09642	-0.0264423	0.00377241	RNFT1P2	12538	intergenic	0.158	1f	5	15
127	rs2060604	8	76650334	2.80209e-12	C	T	0.4135	0.0150051	0.00214748	AC016194.1	48265	intergenic	4.148	NA	9	15
43	rs4482463	2	205375909	4.75219e-12	A	C	0.08052	0.0285972	0.00413685	AC016903.2	3513	intergenic	16.33	3a	5	15
23	rs1032524	1	201790826	6.01439e-12	C	T	0.4841	-0.0145939	0.00212142	NAV1:IPO9-AS1	0	ncRNA_intronic	6.932	NA	4	4
179	rs11636565	15	36391846	6.8438e-12	A	C	0.4881	-0.0144436	0.00210521	RP11-184D12.1	0	ncRNA_intronic	20.9	7	14	15
156	rs1784460	11	118938371	8.1529e-12	A	T	0.3598	-0.0150203	0.00219729	RP11-110I1.13	0	ncRNA_exonic	7.94	1f	1	1
200	rs6499861	16	56991495	8.60639e-12	G	C	0.162	-0.0182315	0.00267009	AC012181.1	221	downstream	0.481	7	5	15
108	rs4947406	7	50661735	9.34683e-12	G	T	0.3499	0.0162488	0.00238385	GRB10	0	intronic	3.853	5	4	4
93	rs4391262	6	50378717	9.38482e-12	T	C	0.05368	-0.0324862	0.00476642	RP11-524K22.1	103030	intergenic	17.9	5	7	15
28	rs13390269	2	25068793	1.15451e-11	A	G	0.08648	-0.0254328	0.00374795	ADCY3	0	intronic	1.225	5	1	5
107	rs1534696	7	26397239	1.24124e-11	A	C	0.4394	0.0141531	0.00208892	SNX10	0	intronic	1.942	NA	4	15
54	rs11720264	3	49580347	1.69844e-11	T	C	0.4334	-0.0142279	0.00211415	BSN-AS2	6391	intergenic	0.068	4	5	14
118	rs2968856	7	150614934	1.79826e-11	C	T	0.2614	0.0159506	0.00237306	KCNH2	27114	intergenic	3.643	NA	7	14
10	rs2787693	1	49915848	1.94359e-11	A	C	0.3022	0.0165672	0.00246895	AGBL4:AGBL4-IT1	0	ncRNA_intronic	14.09	7	7	15
182	rs11631408	15	51746236	2.4387e-11	G	A	0.4632	0.0142954	0.00214098	RP11-707P17.1:DMXL2	0	ncRNA_intronic	5.812	6	4	5
13	rs17380796	1	77976117	2.56254e-11	G	A	0.2117	-0.0176149	0.00264102	AK5	0	intronic	8.17	5	5	15
210	rs8078079	17	34959346	2.89481e-11	C	T	0.3946	0.014604	0.00219549	MRM1	0	intronic	2.366	1f	1	2
121	rs7836748	8	19639509	3.12112e-11	C	T	0.2684	0.015282	0.00230125	CSGALNACT1	23968	intergenic	4.338	6	9	15
40	rs17694506	2	171632225	3.33277e-11	T	C	0.3877	0.0144016	0.00217183	AC007405.6	0	ncRNA_exonic	5.546	5	5	15
82	rs40067	5	107439012	4.04919e-11	A	G	0.1799	0.018132	0.00274633	FBXL17	0	intronic	11.08	NA	2	15
201	rs7198357	16	67884619	4.08532e-11	T	C	0.1779	0.0171588	0.00259944	NUTF2	0	intronic	4.821	6	4	5
145	rs4929923	11	8639200	4.275e-11	C	T	0.3767	-0.0145256	0.00220278	TRIM66	0	UTR3	6.301	6	4	4
189	rs11072938	15	81021661	4.30462e-11	T	C	0.2406	0.0162574	0.00246579	ABHD17C	0	intronic	1.449	6	5	5
9	rs741959	1	47676233	6.18903e-11	G	A	0.4016	0.0141858	0.00216939	TAL1	5728	intergenic	5.113	NA	2	14
5	rs17162333	1	27236757	6.23885e-11	G	C	0.1322	-0.0196401	0.00300404	NUDC	0	intronic	1.659	4	3	15
151	rs102275	11	61557803	6.28125e-11	C	T	0.3628	-0.0129002	0.00197345	TMEM258	0	intronic	8.908	7	3	4
130	rs4740619	9	15634326	6.33308e-11	C	T	0.4811	0.0137939	0.00211055	CCDC171	0	intronic	7.832	6	5	15
152	rs557675	11	65566719	6.46297e-11	G	T	0.4622	0.0137504	0.00210488	OVOL1:RP11-770G2.5	2028:2028	intergenic	2.759	NA	5	14
213	rs11079849	17	47090785	6.90033e-11	T	C	0.2903	0.0151839	0.00232781	IGF2BP1:RP11-501C14.6	0	ncRNA_intronic	0.087	2b	1	13
50	rs1513475	3	35724256	8.45717e-11	C	T	0.3429	0.0153726	0.00236785	ARPP21	0	intronic	2.343	7	1	15
34	rs2861688	2	67838474	8.97334e-11	C	T	0.2734	0.0155295	0.0023953	AC010987.5	0	ncRNA_intronic	2.714	7	5	15
42	rs9630985	2	181607676	9.29994e-11	C	A	0.3489	-0.014485	0.00223606	AC009478.1	50494	intergenic	3.234	3a	2	15
122	rs1362910	8	30856464	9.69647e-11	G	A	0.3857	0.0142404	0.00220044	PURG	0	intronic	9.934	6	5	15
96	rs10872224	6	98435125	9.76271e-11	T	G	0.4085	-0.0138387	0.00213871	RP11-436D23.1	0	ncRNA_intronic	1.606	7	14	15
92	rs998584	6	43757896	9.99376e-11	A	C	0.496	-0.0133734	0.00206792	VEGFA	3671	intergenic	12.4	NA	2	15
53	rs7638388	3	47914974	1.0143e-10	T	C	0.08847	-0.02371	0.00366756	MAP4	0	intronic	1.069	7	4	4
18	rs1730858	1	107619244	1.04473e-10	C	T	0.328	0.0147479	0.00228284	PRMT6	17327	intergenic	2.691	NA	7	15
203	rs2925979	16	81534790	1.10377e-10	C	T	0.2883	0.0144179	0.00223464	CMIP	0	intronic	5.802	NA	1	5
28	rs6545975	2	25385485	1.22737e-10	T	C	0.3907	0.0141561	0.00219954	POMC	0	intronic	0.104	7	5	14
90	rs12525532	6	35004819	1.32676e-10	T	C	0.3946	-0.0139837	0.00217677	ANKS1A	0	intronic	4.438	6	2	5
102	rs9478499	6	154345289	1.3478e-10	A	T	0.1471	-0.0190503	0.00296657	OPRM1	0	intronic	1.36	7	9	15
146	rs7947951	11	13356030	1.5934e-10	G	A	0.2972	-0.014477	0.0022634	ARNTL	0	intronic	4.226	4	2	7
223	rs8108738	19	18255359	1.63023e-10	A	G	0.498	0.0144036	0.00225314	MAST3:AC007192.6	0	exonic	14.19	4	4	4
2	rs6577584	1	6715390	1.64995e-10	G	T	0.3718	-0.0139474	0.00218241	DNAJC11	0	intronic	1.024	7	4	5
94	rs6907923	6	51802669	1.7093e-10	A	G	0.341	-0.0145415	0.0022773	PKHD1	0	intronic	0.874	6	5	15
115	rs2396625	7	113028634	1.99395e-10	A	T	0.4006	0.0138993	0.00218481	RP11-703P11.1	27109	intergenic	6.422	6	5	15
216	rs4800452	18	20727611	2.1087e-10	T	C	0.2187	-0.0162721	0.00256124	CABLES1	0	intronic	2.835	6	2	15
124	rs13275593	8	68257300	2.14259e-10	A	G	0.2853	-0.0148382	0.00233645	RP11-7F18.2	0	ncRNA_exonic	1.026	5	1	15
113	rs2299383	7	103418846	2.19803e-10	T	C	0.4095	-0.0137555	0.0021673	RELN	0	intronic	4.038	7	5	15
144	rs2531686	10	118651011	2.22213e-10	G	C	0.2763	0.0148989	0.00234808	ENO4:KIAA1598	0	intronic	14.56	2b	1	5
191	rs11866815	16	387867	2.31533e-10	T	C	0.2416	0.0155712	0.00245649	AXIN1	0	intronic	0.26	5	2	5
32	rs13416667	2	56608267	2.31713e-10	A	C	0.2744	-0.015122	0.00238567	RP11-482H16.1:CCDC85A	0	ncRNA_intronic	1.534	5	5	15
58	rs1448613	3	85875265	2.40053e-10	A	G	0.3857	0.013986	0.00220834	CADM2:CADM2-AS2	0	ncRNA_intronic	4.811	NA	9	15
207	rs4790292	17	1824305	2.65561e-10	A	C	0.1441	0.0195983	0.00310216	RTN4RL1	13665	intergenic	11.59	5	1	14
73	rs12513212	4	96149346	2.8456e-10	C	A	0.3867	-0.0136256	0.00216041	UNC5C	0	intronic	1.412	6	5	15
220	rs9961247	18	58132791	3.18882e-10	T	G	0.01789	0.0511556	0.00813374	RP11-325K19.3	30309	intergenic	0.197	7	14	15
199	rs17218700	16	53844579	3.19672e-10	A	G	0.1332	0.0196857	0.00313022	FTO	0	intronic	0.449	7	4	5
98	rs1159974	6	126090277	3.29887e-10	C	T	0.499	-0.0132447	0.00210767	HEY2	7861	intergenic	3.681	5	5	15
152	rs801733	11	65934549	3.74585e-10	C	A	0.3579	0.0138077	0.0022042	PACS1	0	intronic	7.183	NA	4	15
195	rs12446554	16	19935073	3.78721e-10	T	G	0.1302	0.0196031	0.00313021	AC134300.1	33153	intergenic	0.288	5	5	15
37	rs6754311	2	136707982	3.95022e-10	C	T	0.4891	0.0133991	0.0021418	DARS	0	intronic	6.25	5	4	5
147	rs17309825	11	27526105	4.09209e-10	C	T	0.03877	-0.0343015	0.00548782	LIN7C	0	intronic	4.181	4	2	5
178	rs2015407	14	103274547	4.67519e-10	G	A	0.3449	0.0139316	0.00223635	TRAF3	0	intronic	5.16	4	2	15
136	rs6602151	10	16764483	5.89483e-10	C	T	0.2942	-0.0145814	0.00235441	RSU1:RP11-197M22.2	0	ncRNA_intronic	2.205	6	4	5
232	rs4810479	20	44545048	6.16959e-10	T	C	0.2883	0.0130141	0.00210379	PLTP	4253	intergenic	5.387	5	5	15
17	rs11165643	1	96924097	6.89954e-10	T	C	0.4175	-0.0134393	0.00217874	EEF1A1P11	10222	intergenic	1.364	6	9	15
216	rs12327104	18	20799961	7.27102e-10	A	G	0.2624	-0.0145663	0.00236462	CABLES1:TMEM241	0	intronic	0.105	5	4	5
26	rs10209658	2	557322	7.27251e-10	C	T	0.08052	0.0240457	0.00390349	AC093326.3	881	upstream	1.644	5	7	14
234	rs2836753	21	40291187	7.29268e-10	C	T	0.3847	-0.0132533	0.00215164	AF064858.6	0	ncRNA_intronic	2.645	4	2	15
162	rs808820	12	89744826	8.37405e-10	G	A	0.1163	-0.0215066	0.00350403	DUSP6	0	exonic	9.035	4	1	1
177	rs6575340	14	94023972	8.81593e-10	A	G	0.3767	-0.013607	0.00221992	UNC79	0	intronic	1.022	7	5	15
20	rs12033257	1	112318484	8.96701e-10	G	A	0.3817	0.0135063	0.00220447	KCND3	0	UTR3	1.056	5	4	15
184	rs17821316	15	58703069	9.96642e-10	C	A	0.4881	-0.0118264	0.00193559	ALDH1A2:LIPC	0	intronic	5.713	5	1	15
26	rs1317005	2	656312	1.03581e-09	A	C	0.2883	-0.0141229	0.00231379	TMEM18	11022	intergenic	0.923	6	5	14
235	rs397092	21	46582564	1.06839e-09	G	A	0.4563	-0.0129741	0.0021273	ADARB1	0	intronic	0.713	5	3	5
198	rs4341759	16	30514103	1.07125e-09	A	G	0.4245	0.0131166	0.00215082	ITGAL	0	intronic	9.607	7	4	15
217	rs11660335	18	22154235	1.07227e-09	C	T	0.161	0.01757	0.00288115	RP11-178F10.4	51351	intergenic	0.839	7	8	9
39	rs6711375	2	161090873	1.11363e-09	A	G	0.3201	-0.0137646	0.00225937	ITGB6	0	NA	1.504	6	5	15
26	rs10185713	2	621254	1.21921e-09	G	A	0.2028	-0.0161149	0.00265147	AC093326.3	43108	intergenic	3.286	5	5	15
31	rs4971632	2	50240091	1.26262e-09	C	T	0.166	0.0171492	0.00282426	NRXN1	0	intronic	0.963	7	5	15
231	rs2143253	20	41987392	1.29377e-09	A	G	0.1372	0.0186426	0.0030722	RP5-862K6.4	29889	intergenic	0.692	6	9	15
198	rs8047664	16	30844546	1.29511e-09	C	T	0.03082	-0.0370233	0.00610141	BCL7C	400	downstream	0.289	7	5	15
44	rs13029936	2	208465544	1.3125e-09	T	C	0.1759	0.0171942	0.00283459	CREB1:METTL21A	0	UTR3	7.401	5	4	5
209	rs1914888	17	21267541	1.33468e-09	G	A	0.4622	0.0129115	0.0021295	KCNJ12	11967	intergenic	0.779	5	5	15
180	rs1200349	15	41821752	1.36103e-09	C	T	0.4821	-0.0125229	0.00206647	RPAP1	0	exonic	10.61	1f	4	4
198	rs4787480	16	29857316	1.38037e-09	A	G	0.1292	-0.0204199	0.00337088	MVP	0	intronic	3.672	1f	4	4
36	rs13024601	2	100902032	1.39224e-09	T	C	0.3459	0.0136111	0.0022474	LONRF2	0	intronic	3.562	7	2	15
127	rs10109284	8	77239544	1.40306e-09	A	G	0.4463	-0.0129998	0.00214691	RNU2-54P	61576	intergenic	5.123	7	14	15
212	rs17618704	17	46221010	1.51899e-09	G	T	0.06759	0.0249218	0.00412452	SKAP1	0	intronic	8.838	3a	4	13
103	rs13206549	6	162978032	1.53776e-09	G	T	0.1342	0.0186277	0.00308387	PARK2	0	intronic	4.239	4	5	15
164	rs7488867	12	103699685	1.56873e-09	T	C	0.2813	0.0151581	0.00251081	C12orf42	0	intronic	1.293	6	4	15
215	rs4889782	17	78640510	1.61478e-09	T	C	0.4145	0.0129842	0.00215238	RPTOR	0	intronic	0.224	7	2	5
72	rs4693325	4	94408529	1.74359e-09	C	A	0.1988	-0.0158517	0.00263315	GRID2	0	intronic	0.698	7	14	15
190	rs6603004	15	84568504	1.81478e-09	G	A	0.4662	-0.0126565	0.00210465	ADAMTSL3	0	intronic	9.707	5	4	15
85	rs11747810	5	153100273	1.82873e-09	C	T	0.495	0.0127369	0.00211847	GRIA1	0	intronic	6.671	5	5	15
119	rs9987289	8	9183358	1.84011e-09	G	A	0.07455	0.0223193	0.00371288	RP11-115J16.1	0	ncRNA_intronic	1.139	5	2	15
101	rs12201987	6	143182396	1.87134e-09	T	C	0.2048	0.0155759	0.00259227	HIVEP2	0	intronic	6.893	5	2	15
174	rs2180454	14	29690513	1.90286e-09	C	T	0.2406	-0.0150542	0.00250657	RP11-562L8.1	43517	intergenic	2.885	6	2	15
75	rs13435860	4	136975545	1.93571e-09	T	A	0.3678	-0.0133425	0.0022226	RP11-775H9.3	43406	intergenic	5.29	6	9	15
74	rs13107325	4	103188709	1.94004e-09	T	C	0.07952	-0.0232966	0.00388098	SLC39A8	0	exonic	23.1	5	4	15
167	rs12824567	12	124495203	1.94088e-09	C	G	0.3499	0.0126598	0.00210902	ZNF664:FAM101A	0	intronic	1.798	7	4	5
60	rs1456116	3	123084379	1.98611e-09	A	G	0.4175	-0.0127278	0.00212168	ADCY5	0	intronic	3.802	NA	5	15
29	rs4665991	2	27766284	2.16326e-09	A	G	0.2644	-0.0126179	0.00210824	AC109829.1	0	intronic	1.139	5	5	15
166	rs10734924	12	123018894	2.18517e-09	G	T	0.2594	-0.0154563	0.00258319	KNTC1	0	intronic	8.014	7	4	5
51	rs3864004	3	41240177	2.30194e-09	A	G	0.4324	-0.0135108	0.00226124	CTNNB1	0	UTR5	7.879	5	1	1
78	rs7700719	5	74291869	2.78836e-09	G	A	0.495	0.0127737	0.00214916	CTD-2503O16.4	0	ncRNA_intronic	8.681	5	5	15
208	rs2242449	17	7095507	2.84537e-09	T	C	0.4165	-0.0129711	0.00218359	DLG4	0	intronic	14.26	NA	3	4
155	rs5110	11	116691634	2.95212e-09	A	C	0.06561	-0.0238689	0.00402224	APOA4	0	exonic	7.859	NA	1	15
224	rs11880870	19	18830704	2.97893e-09	G	A	0.499	0.0126569	0.00213339	CRTC1	0	intronic	3.672	5	4	5
187	rs4777542	15	73082366	3.13584e-09	T	C	0.3002	0.0135941	0.00229463	ADPGK-AS1	0	ncRNA_intronic	1.616	6	5	15
154	rs349088	11	84814393	3.23019e-09	A	C	0.4801	0.0126056	0.00212953	DLG2	0	intronic	0.817	7	9	15
55	rs17639546	3	61251635	3.64746e-09	A	G	0.1481	0.0176501	0.00299182	FHIT	14501	intergenic	1.106	5	5	15
47	rs906673	3	12898941	3.67482e-09	T	C	0.3887	0.0128915	0.00218567	CAND2	0	intronic	1.776	7	5	15
112	rs2272168	7	99102777	3.68154e-09	C	G	0.163	0.0168208	0.002852	ZKSCAN5	0	UTR5	15.2	4	1	1
161	rs10783779	12	56491880	3.83872e-09	G	T	0.4026	0.012701	0.00215599	ERBB3	0	intronic	9.45	6	4	4
36	rs4851254	2	100762937	3.85368e-09	G	C	0.2654	0.0140441	0.00238426	AFF3	3735	intergenic	4.075	5	5	15
95	rs1507153	6	79484386	3.85814e-09	A	C	0.3638	-0.0128124	0.00217522	RP11-173D14.3	35045	intergenic	0.486	7	14	15
15	rs7549987	1	80789011	4.01995e-09	T	C	0.2992	-0.0135158	0.00229729	AL606519.1	6052	intergenic	3.288	7	5	15
141	rs10887579	10	88097210	4.09338e-09	C	A	0.3539	-0.0130999	0.00222773	GRID1	0	intronic	0.09	4	5	15
183	rs7161874	15	53163740	4.10536e-09	G	C	0.2137	-0.0150413	0.00255809	RPSAP55	14051	intergenic	1.335	7	7	15
59	rs1580099	3	94003603	4.35369e-09	A	C	0.4056	0.0135207	0.00230329	NSUN3	156213	intergenic	15.95	NA	5	15
159	rs1458156	12	41887940	4.45158e-09	T	C	0.4493	-0.0128128	0.00218408	PDZRN4	0	intronic	4.811	NA	5	15
171	rs9556979	13	99241507	4.52909e-09	G	T	0.3241	-0.013481	0.0022991	STK24-AS1	10422	intergenic	5.283	5	5	15
170	rs7323827	13	94116675	4.58602e-09	G	A	0.3042	0.0134258	0.00229049	GPC6	0	intronic	0.169	6	5	15
49	rs6550597	3	18738940	4.61337e-09	A	G	0.2982	-0.0133807	0.00228318	AC144521.1	0	ncRNA_intronic	0.132	6	9	15
99	rs6916318	6	127435106	4.62541e-09	T	A	0.4861	-0.0121156	0.00206747	RSPO3	4642	intergenic	1.17	7	5	14
8	rs7515635	1	42408070	4.68197e-09	C	T	0.4712	0.0123084	0.00210109	HIVEP3	0	NA	9.6	5	5	15
64	rs192812	3	161491831	4.86881e-09	T	C	0.4543	-0.0124741	0.00213174	RP11-774I5.1	42865	intergenic	3.539	NA	7	15
24	rs227199	1	210265384	5.055e-09	C	G	0.3161	0.0131556	0.0022506	SYT14	0	intronic	0.222	6	5	15
87	rs4377779	6	12117344	5.27413e-09	C	T	0.334	0.0130792	0.00224025	HIVEP1	0	intronic	1.065	2b	4	5
194	rs1876359	16	4930100	5.40458e-09	T	C	0.3767	-0.012739	0.0021835	UBN1	0	exonic	15.34	5	4	4
4	rs649458	1	23712528	5.65708e-09	A	T	0.1372	0.0178347	0.00306091	TCEA3	0	intronic	7.13	5	4	5
106	rs4410790	7	17284577	5.72192e-09	C	T	0.3847	-0.0124618	0.00213947	AC003075.4	34880	intergenic	5.909	6	5	15
107	rs976346	7	26440503	5.77008e-09	G	A	0.4155	-0.0124505	0.00213805	AC004540.5	0	ncRNA_intronic	14.3	6	5	15
54	rs12631248	3	50080174	5.82945e-09	G	C	0.07455	-0.023346	0.00401026	RBM6	0	intronic	0.536	7	4	5
109	rs11981190	7	71659538	5.84202e-09	A	G	0.341	0.0129979	0.00223285	CALN1	0	intronic	0.648	5	5	15
220	rs2000746	18	57677294	6.1197e-09	G	A	0.2386	0.0145712	0.00250647	SDCCAG3P1	0	ncRNA_exonic	3.364	NA	5	15
11	rs1937433	1	66444183	6.27219e-09	G	C	0.4702	-0.0124558	0.00214411	PDE4B	0	intronic	1.312	5	5	15
229	rs6115015	20	25027692	6.29699e-09	A	G	0.333	-0.0130126	0.0022402	ACSS1	0	intronic	1.117	5	4	4
84	rs1363695	5	130378027	6.49433e-09	T	C	0.2276	0.0147305	0.0025382	RP11-114H7.3	33591	intergenic	3.095	4	7	15
133	rs2275543	9	107651174	6.57953e-09	C	T	0.0994	-0.0191216	0.00329607	ABCA1	0	intronic	12.96	6	2	5
203	rs6564889	16	81591496	6.85725e-09	C	T	0.4076	-0.0123427	0.00213011	CMIP	0	intronic	4.433	3a	3	5
215	rs9910745	17	78610543	6.91739e-09	T	C	0.4334	0.0124599	0.00215088	RPTOR	0	intronic	0.934	5	4	5
230	rs12624640	20	32952125	7.1669e-09	A	G	0.4304	-0.0121138	0.0020933	ITCH	0	intronic	7.944	4	1	2
107	rs4722596	7	26491234	7.62908e-09	T	C	0.0825	-0.0218677	0.00378566	AC004540.5	0	ncRNA_intronic	1.326	5	2	15
45	rs4283409	2	228977142	7.63776e-09	G	A	0.3867	-0.0124719	0.00215917	SPHKAP	0	intronic	3.747	6	5	15
199	rs16952522	16	53807498	7.8709e-09	G	C	0.04672	-0.0313604	0.00543395	FTO	0	intronic	17.38	2b	2	7
142	rs11187845	10	96060198	8.07964e-09	A	C	0.09642	0.0203589	0.00353036	PLCE1	0	intronic	9.746	7	4	15
223	rs17724992	19	18454825	8.13453e-09	G	A	0.2445	0.0142089	0.0024644	PGPEP1	0	intronic	0.178	4	2	5
140	rs703965	10	80955067	8.25474e-09	T	C	0.4563	-0.0122086	0.00211838	ZMIZ1	0	intronic	8.618	4	1	7
68	rs9816226	3	185834499	8.55592e-09	T	A	0.1879	-0.01592	0.00276527	DGKG	0	intergenic	3.34	7	5	14
139	rs2002023	10	76848524	8.91715e-09	T	C	0.4414	-0.0121167	0.0021072	PPIAP13	481	downstream	3.666	NA	5	15
39	rs1457234	2	161138394	9.15389e-09	T	C	0.1362	-0.0173069	0.00301215	RBMS1	0	intronic	11.56	NA	4	5
229	rs12481037	20	25593688	9.19259e-09	T	C	0.161	-0.0163069	0.00283845	NANP	0	UTR3	0.672	6	4	5
134	rs10116353	9	111950088	9.38942e-09	T	G	0.3072	0.0130862	0.00227927	EPB41L4B	0	intronic	7.783	6	5	15
91	rs12663230	6	40345542	9.4465e-09	A	T	0.1431	0.0177018	0.00308374	TDRG1	0	ncRNA_intronic	0.804	5	5	15
168	rs4477562	13	54104968	9.8013e-09	T	C	0.1103	-0.019644	0.0034258	AL450423.1	162876	intergenic	0.999	5	9	15
56	rs1452075	3	62481063	9.95594e-09	T	C	0.2843	-0.0135669	0.00236708	CADPS	0	intronic	3.345	7	5	15
105	rs6463489	7	5542513	1.02854e-08	C	T	0.06859	0.0236128	0.00412382	FBXL18	0	intronic	7.56	5	4	4
212	rs208015	17	46252346	1.06928e-08	C	T	0.08847	0.0216791	0.00379048	SKAP1	0	intronic	10.6	NA	4	14
57	rs6548834	3	82704753	1.07873e-08	A	G	0.3777	-0.0125948	0.00220271	CYP51A1P1	150912	intergenic	1.031	6	5	15
158	rs11611246	12	939480	1.14208e-08	T	G	0.1829	-0.0159795	0.00279941	WNK1	0	intronic	6.312	7	4	4
41	rs10930502	2	172890588	1.18011e-08	G	A	0.3042	0.0129954	0.00227887	METAP1D	0	intronic	1.7	7	5	15
86	rs779655	5	170495158	1.21427e-08	C	G	0.2724	-0.0135525	0.00237858	RANBP17	0	intronic	1.351	7	5	9
143	rs563296	10	99772404	1.23049e-08	A	G	0.4414	-0.0129605	0.00227559	CRTAC1	0	intronic	15.38	7	5	14
46	rs2596933	3	9365746	1.25745e-08	A	G	0.2674	0.0136259	0.00239397	SRGAP3:RP11-380O24.1	0	ncRNA_intronic	1.604	NA	5	15
38	rs429343	2	147903382	1.25859e-08	G	A	0.4374	0.0121098	0.00212766	snoU13	178156	intergenic	2.784	7	14	15
204	rs7206608	16	82872628	1.26365e-08	G	C	0.3131	-0.0129809	0.00228099	CDH13	0	intronic	1.48	6	5	15
175	rs17115145	14	30122409	1.28747e-08	T	C	0.4056	-0.0122688	0.00215707	PRKD1:CTD-2503I6.1	0	ncRNA_intronic	0.581	5	5	15
165	rs7962636	12	116450006	1.31602e-08	C	T	0.3549	0.0125712	0.00221169	MED13L	0	intronic	1.935	7	4	4
190	rs1057946	15	85182786	1.34174e-08	T	G	0.1352	0.017434	0.00306901	SCAND2P	0	ncRNA_exonic	1.116	5	4	4
48	rs7642876	3	15883094	1.34534e-08	G	A	0.4036	0.0122238	0.002152	ANKRD28	0	intronic	3.333	6	5	15
26	rs2685230	2	437664	1.4474e-08	G	A	0.3469	-0.0125852	0.00222052	AC105393.2	15360	intergenic	0.425	4	1	15
33	rs10490098	2	59129941	1.45677e-08	A	G	0.09642	0.0200557	0.0035393	LINC01122	0	ncRNA_intronic	1.291	7	5	15
66	rs2035831	3	173683791	1.47543e-08	C	G	0.3211	0.0128384	0.00226651	NLGN1	0	intronic	0.743	6	5	15
120	rs7824519	8	14222796	1.51403e-08	G	T	0.3241	-0.0127979	0.00226112	SGCZ	0	intronic	1.259	7	9	15
89	rs9277972	6	33276770	1.54603e-08	T	A	0.168	-0.0162414	0.00287135	TAPBP	0	intronic	4.126	6	4	5
52	rs3852012	3	44045981	1.57157e-08	A	G	0.2873	0.0130572	0.00230956	RP4-555D20.4	5339	intergenic	9.45	5	1	14
3	rs6673977	1	7736097	1.63017e-08	G	A	0.3539	-0.0124986	0.00221322	CAMTA1	0	intronic	2.554	2b	5	15
121	rs3898938	8	19749390	1.63188e-08	T	C	0.4553	0.0115019	0.00203678	LPL	9837	intergenic	1.253	NA	5	15
181	rs1353580	15	47738732	1.70043e-08	A	T	0.3738	-0.0121561	0.00215534	SEMA6D	0	intronic	4.143	6	5	15
148	rs1222220	11	30343925	1.71149e-08	A	C	0.334	0.0135005	0.00239419	ARL14EP	672	upstream	5.379	NA	1	14
135	rs3902840	9	129419025	1.72128e-08	A	G	0.09245	-0.0206311	0.00365935	LMX1B	0	intronic	3.899	NA	5	14
188	rs2660824	15	73618309	1.74603e-08	T	C	0.4841	0.0119747	0.00212488	HCN4	0	intronic	2.205	5	4	15
81	rs12520822	5	105699867	1.83884e-08	T	C	0.4076	0.0119364	0.00212145	CTC-278L1.1	51409	intergenic	5.906	6	5	15
73	rs1365691	4	96073956	1.85807e-08	T	A	0.4414	0.0126245	0.00224447	BMPR1B	0	intronic	0.463	5	4	15
150	rs7941758	11	47918140	1.85918e-08	A	G	0.06064	-0.0247912	0.00440762	RP11-793I11.1	8734	intergenic	0.79	5	9	15
222	rs350832	19	4069426	1.87934e-08	A	G	0.2266	-0.0144423	0.00256854	ZBTB7A	2482	intergenic	3.787	NA	1	15
78	rs4301212	5	74408979	1.97234e-08	A	G	0.1829	0.0152335	0.00271328	ANKRD31	0	intronic	0.072	7	7	15
33	rs12612428	2	58828431	2.01731e-08	C	T	0.1352	-0.0172093	0.00306733	LINC01122	0	ncRNA_intronic	4.594	2b	5	15
152	rs479315	11	66064991	2.07869e-08	C	G	0.17	-0.015748	0.00280948	TMEM151A	855	downstream	0.321	5	5	14
169	rs9563569	13	58571207	2.09155e-08	A	G	0.1501	0.0177768	0.00317202	RNA5SP30	5608	intergenic	4.013	4	7	15
83	rs6868198	5	122750714	2.10114e-08	A	G	0.4324	0.012838	0.00229108	CEP120	0	intronic	0.708	5	4	5
114	rs2470945	7	104585760	2.10381e-08	A	C	0.4076	-0.0120229	0.0021457	RP11-325F22.2	0	ncRNA_intronic	0.31	2b	1	7
221	rs2074881	19	1970021	2.24532e-08	T	C	0.1789	0.0153981	0.00275362	CSNK1G2	0	intronic	0.027	1f	3	4
131	rs1330304	9	16714629	2.32466e-08	G	C	0.2674	0.0132156	0.00236588	BNC2	0	intronic	4.336	5	5	15
185	rs4074448	15	63888495	2.37439e-08	A	G	0.4344	0.0117519	0.00210523	USP3-AS1	0	ncRNA_intronic	0.038	1b	2	5
96	rs1338556	6	98340176	2.38608e-08	T	C	0.1093	0.0187804	0.00336483	RP11-436D23.1	0	ncRNA_intronic	1.508	NA	14	15
30	rs2075226	2	36805676	2.4844e-08	G	A	0.3956	-0.0128618	0.00230731	FEZ2	0	intronic	5.998	NA	3	4
123	rs705986	8	64737682	2.52914e-08	G	A	0.4911	0.0117465	0.00210841	RP11-32K4.1	0	ncRNA_intronic	4.401	6	9	15
116	rs2237717	7	116405387	2.63418e-08	C	T	0.4433	-0.0114853	0.00206415	MET	0	intronic	8.176	7	4	15
69	rs2298969	4	3186244	2.78577e-08	G	A	0.4901	0.011536	0.00207691	HTT	0	intronic	3.34	5	4	4
16	rs818524	1	85201228	2.84306e-08	C	T	0.2893	-0.0128911	0.00232237	SSX2IP	44741	intergenic	8.666	NA	5	15
176	rs17836226	14	80075891	2.92351e-08	G	A	0.4264	0.011733	0.0021156	NRXN3	0	intronic	0.762	6	5	15
10	rs2356865	1	50836334	2.92458e-08	T	C	0.2932	0.0128239	0.00231232	HMGB1P45	28162	intergenic	3.641	NA	5	14
35	rs13416004	2	69664976	3.16301e-08	T	C	0.4145	0.0118652	0.00214476	NFU1	215	upstream	0.955	1b	1	2
22	rs2990997	1	190119703	3.23976e-08	A	T	0.3529	-0.0123401	0.00223231	BRINP3	0	intronic	0.539	6	14	15
211	rs676387	17	40706273	3.42192e-08	A	C	0.2664	-0.0130781	0.00236992	RP11-400F19.8:HSD17B1:RP11-400F19.6	0	ncRNA_exonic	1.544	NA	1	1
157	rs1945941	11	132620118	3.63192e-08	A	G	0.3757	0.0120291	0.00218398	OPCML	0	intronic	3.967	7	5	15
100	rs2781668	6	131897278	3.64264e-08	T	C	0.17	-0.0154167	0.0027993	ARG1:MED23	0	intronic	2.092	4	1	5
80	rs2453763	5	92376460	3.71957e-08	A	T	0.3469	-0.0121856	0.00221408	CTD-2091N23.1	0	ncRNA_intronic	14.71	7	14	15
33	rs42829	2	59119064	3.79607e-08	C	T	0.1561	-0.0160303	0.00291455	LINC01122	0	ncRNA_intronic	5.065	NA	5	15
79	rs323781	5	86752616	3.82409e-08	C	A	0.0338	-0.0319295	0.00580665	RNU6-727P	36351	intergenic	0.559	NA	5	15
71	rs442177	4	88030261	3.88894e-08	T	G	0.4215	-0.0111202	0.00202339	AFF1	0	intronic	1.534	NA	2	4
79	rs16903228	5	87828459	4.00419e-08	A	C	0.07952	-0.0212232	0.00386531	LINC00461	0	ncRNA_intronic	2.183	7	9	15
67	rs9872156	3	176337348	4.04274e-08	A	G	0.2604	-0.013145	0.0023948	RP11-71G7.1	0	ncRNA_intronic	11.59	7	14	15
172	rs1886558	13	111982615	4.1425e-08	G	A	0.3887	0.0121424	0.00221389	TEX29	0	intronic	4.388	5	5	15
220	rs9319962	18	57864141	4.14324e-08	T	G	0.09245	0.0214712	0.00391479	RP11-795H16.2	0	ncRNA_exonic	14.41	5	1	15
104	rs11766944	7	1888051	4.17169e-08	A	G	0.2137	0.0150607	0.00274659	MAD1L1:AC110781.3	0	UTR3	1.35	5	4	15
76	rs7668263	4	143781835	4.21365e-08	C	T	0.3817	-0.0118439	0.00216065	INPP4B	13249	intergenic	10.79	6	5	15
6	rs512005	1	33377679	4.26836e-08	C	T	0.2356	0.0144821	0.00264303	TMEM54	10639	intergenic	14.17	NA	5	14
117	rs1899689	7	121964349	4.27313e-08	T	C	0.3797	-0.011977	0.00218591	CADPS2	0	intronic	2.013	7	5	15
65	rs8192675	3	170724883	4.30479e-08	C	T	0.2893	-0.0128761	0.00235056	SLC2A2	0	intronic	0.162	NA	4	15
172	rs9522262	13	112186283	4.48362e-08	G	C	0.4801	-0.0116605	0.00213145	RP11-65D24.2	54264	intergenic	0.765	4	5	13
149	rs10768994	11	43936945	4.52048e-08	C	T	0.4304	0.0115633	0.00211426	ALKBH3:ALKBH3-AS1	0	ncRNA_intronic	4.367	5	4	5
1	rs7537581	1	2725475	4.55072e-08	A	C	0.4761	-0.0116571	0.00213187	RP11-740P5.2	2939	intergenic	0.073	5	5	14
205	rs12596491	16	88928417	4.57822e-08	T	C	0.34	0.0119497	0.0021858	TRAPPC2L:PABPN1L	0	UTR3	1.447	1f	4	4
218	rs4890439	18	40732586	4.59935e-08	A	G	0.3748	0.0120766	0.00220935	RIT2	36928	intergenic	0.103	6	14	15
125	rs13250456	8	72408720	4.66907e-08	T	C	0.05467	-0.0247785	0.00453529	RP11-1102P16.1	0	intronic	17.76	3a	7	15
206	rs17783751	16	89513984	4.79074e-08	A	C	0.1759	-0.0150463	0.00275628	ANKRD11	0	intronic	1.448	4	2	7
153	rs10160660	11	76474537	4.82537e-08	C	T	0.2475	0.0132593	0.0024295	RP11-21L23.4	0	ncRNA_intronic	4.511	5	2	7
163	rs11105429	12	90231778	4.8667e-08	C	T	0.2575	-0.0130448	0.00239085	RP11-654D12.2	44663	intergenic	5.637	6	5	15
193	rs7189777	16	4002320	4.96259e-08	G	C	0.3708	0.0119814	0.00219736	ADCY9	1067	intergenic	1.601	5	1	14

## Sheet: ST6
Supplementary Table 6. Comparison with GWAS results of Lind (2019) by GWAScatalog. 'Genomic Locus' refers to the MetS factor genomic locus (see ST5) a SNP that was significant in the Lind GWAS resides in. Thus, SNPs shown here were significant in the Lind GWAS and replicated in our study. Information in all other columns is from GWAScatalog and refers to the SNP from the Lind GWAS ('Lind SNP')
Genomic Locus	Independent significant SNP	Chromosome	Position	Lind SNP	Reported gene	Mapped gene	Risk allele frequency	P	BETA
121	rs320	8	19861361	rs3844510	LPL	LPL - NA	0.26399	1e-138	0.191134
129	rs4871603	8	126507308	rs2980888	TRIB1	TRIB1 - NA	0.299847	4e-42	0.0959522
25	rs10779835	1	230297136	rs2281721	GALNT2	GALNT2	0.38621	1e-34	0.0820747
27	rs1042034	2	21237544	rs673548	APOB	APOB	0.204049	2e-32	0.0977899
151	rs102275	11	61597972	rs1535	FADS2	FADS2	0.347774	3e-31	0.0792125
199	rs1421085	16	53806453	rs56094641	FTO	FTO	0.402905	1e-28	0.0736765
92	rs998584	6	43757896	rs998584	VEGFA	VEGFA - LINC02537	0.481524	4e-27	0.0706852
110	rs13244268	7	72878645	rs12056034	BAZ1B	BAZ1B	0.124753	8e-22	0.0968365
220	rs12967135	18	57848651	rs66922415	MC4R	RNU4-17P - NA	0.234519	6e-19	0.0678461
203	rs2925979	16	81534790	rs2925979	CMIP	CMIP	0.301767	3e-18	0.0616096
150	rs7928842	11	47529947	rs7124681	CELF1	CELF1	0.408583	3e-17	0.055786
7	rs4660808	1	40048009	rs11206374	PABPC4	PABPC4 - HEYL	0.225477	4e-17	0.065077
62	rs645040	3	135954979	rs61789601	PCCB	MSL2 - PCCB	0.202909	8e-17	0.0683717
119	rs9987289	8	9183358	rs9987289	LOC157273	RNU6-1151P - RNU6-526P	0.0919748	3e-15	0.0873883
138	rs7075195	10	65071215	rs10822155	JMJD1C	JMJD1C	0.41581	2e-14	0.0511185
228	rs3810291	19	47571938	rs1532127	ZC3H4	ZC3H4	0.314222	2e-11	0.0472097
216	rs891387	18	21120035	rs7239575	NPC1	NPC1	0.49327	4e-11	0.043234
63	rs13322435	3	156797648	rs10049088	LINC00880	LEKR1 - LINC00880	0.386891	5e-11	0.0443217
71	rs442177	4	87982876	rs7660883	AFF1	AFF1	0.377013	6e-11	0.0443878
107	rs1534696	7	26397239	rs1534696	SNX10	SNX10	0.460436	9e-11	0.0424362
26	rs7601028	2	620297	rs7563362	TMEM18	LINC01875 - TMEM18	0.142333	1e-10	0.0613566
143	rs563296	10	99772404	rs563296	CRTAC1	CRTAC1	0.44029	2e-10	0.0419399
74	rs13107325	4	103188709	rs13107325	SLC39A8	SLC39A8	0.0748556	4e-10	0.0760904
21	rs545608	1	177913519	rs10913469	SEC16B	CRYZL2P-SEC16B, SEC16B	0.207314	2e-09	0.0482641
118	rs2968856	7	150657095	rs56282717	KCNH2	KCNH2	0.24425	2e-09	0.0460964
147	rs12288512	11	27723334	rs56133711	BDNF	BDNF	0.262839	2e-09	0.0443302
198	rs3814883	16	29994922	rs3814883	TAOK2	TAOK2	0.48348	2e-09	0.0393918
211	rs676387	17	40713071	rs12945575	COASY	HSD17B1 - COASY	0.25004	3e-09	0.044779
128	rs3808436	8	116563675	rs3808439	TRPS1	TRPS1	0.447923	5e-09	0.0383457
214	rs7212293	17	65840809	rs11871285	BPTF	BPTF	0.193205	8e-09	0.0473409
196	rs9302428	16	24727064	rs7188873	TNRC6A	TNRC6A	0.376011	1e-08	0.03863
137	rs9971210	10	21879084	rs9971210	MLLT10	MLLT10	0.489597	2e-08	0.0365804
40	rs17694506	2	171629063	rs12472667	ERICH2	EIF2S2P4 - Y_RNA	0.371305	3e-08	0.0374895
122	rs1362910	8	30863938	rs10954772	PURG	PURG	0.313991	3e-08	0.0391984
160	rs7132908	12	50247468	rs7138803	BCDIN3D	BCDIN3D - RPL35AP28	0.368675	4e-08	0.0369574
Supplementary Table 14. Overlap between Genomic Risk loci associated with the MetS factor, the MetS components and the MetS GWAS by Lind. All genomic risk loci associated with MetS factor are shown, but indicator phenotypes and Lind GWAS only show non-NA if they have an overlapping genomic risk locus. Genomic risk loci associated with indicator phenotypes or the MetS GWAS by Lind but not with the…

## Sheet: ST7
Supplementary Table 7. Genes implicated by FUMA positional mapping, eQTL or chromatin interaction mapping of significant MetS factor GWAS SNPs. ciMap, mapped by chromatin interaction mapping; ciMap tissue; tissue in which chromatin interaction mapping was observed; eqtlMapSNPs, mapped by expression quantitative traic locus mapping; eQTLMap tissue, tissue in which chromatin interaction mapping was…
Ensembl Gene ID	Gene name	Chromosome	START	END	pLI	ncRVIS	PosMapSNPs	PosMapMaxCADD	eqtlMapSNPs	eqtlMapminP	eqtlMapminQ	eqtlMapt tissue	eqtlDirection	ciMap	ciMap tissue	minGwasP	IndSigSNPs	GenomicLocus
ENSG00000188229	TUBB4B	9	140135665	140138159	0.929541	NA	0	0	7	4.2087e-06	0.0286739	eQTLGen_trans_eQTLs	+	No	NA	5.07301e-152	rs1421085;rs8044769	199
ENSG00000140718	FTO	16	53737875	54155853	0.0113446	0.293683	200	21.4	153	5.8105e-19	0	eQTLGen_cis_eQTLs:GTEx/v8/Esophagus_Gastroesophageal_Junction:GTEx/v8/Muscle_Skeletal:GTEx/v8/Thyroid	+	Yes	Fetal_Cortex:Aorta:Left_Ventricle:IMR90:Mesenchymal_Stem_Cell:Mesendoderm:Trophoblast-like_Cell:hESC	5.07301e-152	rs6499640;rs13333228;rs7186521;rs1421085;rs8044769;rs12446228;rs17218700;rs2058908;rs16952522;rs6499653;rs12921970;rs6499640:rs13333228:rs7186521:rs1421085;rs8044769:rs1421085:rs2058908:rs17218700:rs16952522:rs1421085;rs12446228:rs8044769:rs12446228:rs6499653;rs12921970:rs6499653	199
ENSG00000177508	IRX3	16	54317216	54320675	NA	NA	0	0	73	6.09846e-10	5.67103e-06	eQTLGen_trans_eQTLs:GTEx/v8/Pancreas	+	Yes	Fetal_Cortex:Left_Ventricle:Liver:IMR90:Mesenchymal_Stem_Cell:Mesendoderm:Neural_Progenitor_Cell:Trophoblast-like_Cell:hESC	5.07301e-152	rs7075195;rs7186521;rs1421085;rs8044769;rs12446228;rs6499653;rs12921970;rs6499640:rs13333228:rs7186521:rs1421085;rs8044769:rs1421085:rs2058908:rs17218700:rs16952522:rs1421085;rs12446228:rs8044769:rs12446228:rs6499653;rs12921970:rs6499653	138;199
ENSG00000268317	AC026461.1	16	56662971	56666150	NA	NA	0	0	0	NA	NA	NA	NA	Yes	Left_Ventricle:Liver:GM12878:IMR90:Mesenchymal_Stem_Cell:Mesendoderm:Neural_Progenitor_Cell:Trophoblast-like_Cell:hESC	6.99449e-152	rs2895432:rs12596776:rs1366544:rs4783962:rs6499861:rs12446275:rs1421085;rs8044769:rs1421085:rs2058908:rs17218700:rs16952522:rs1421085;rs12446228:rs8044769:rs12446228:rs6499653;rs12921970:rs6499653:rs6499640:rs13333228:rs7186521	199;200
ENSG00000159461	AMFR	16	56395364	56459450	0.00142576	-0.148589	0	0	2	7.3541e-12	0	eQTLGen_cis_eQTLs	NA	Yes	Adult_Cortex:IMR90:Mesenchymal_Stem_Cell:Mesendoderm:Trophoblast-like_Cell:hESC	6.99449e-152	rs12596776;rs1366544;rs2895432:rs6499640:rs13333228:rs7186521:rs1421085;rs8044769:rs12446228:rs6499653;rs12921970:rs6499653:rs12596776:rs1366544:rs4783962:rs6499861:rs1421085:rs2058908:rs17218700:rs16952522:rs1421085;rs12446228:rs8044769:rs12446275	199;200
ENSG00000256812	CAPNS2	16	55600584	55601599	0.131737	-0.286259	0	0	0	NA	NA	NA	NA	Yes	IMR90:Mesenchymal_Stem_Cell:Trophoblast-like_Cell:hESC	6.99449e-152	rs6499640:rs13333228:rs7186521:rs1421085;rs8044769:rs1421085:rs2058908:rs17218700:rs16952522:rs1421085;rs12446228:rs8044769:rs12446228:rs6499653;rs12921970:rs6499653	199
ENSG00000198848	CES1	16	55836763	55867249	6.76997e-14	0.938108	0	0	0	NA	NA	NA	NA	Yes	Left_Ventricle:IMR90:Mesenchymal_Stem_Cell	6.99449e-152	rs1421085;rs8044769:rs12446228:rs6499653;rs12921970:rs6499653:rs6499640:rs13333228:rs7186521:rs1421085:rs2058908:rs17218700:rs16952522:rs1421085;rs12446228:rs8044769	199
ENSG00000087258	GNAO1	16	56225302	56391356	0.984288	0.474249	0	0	0	NA	NA	NA	NA	Yes	Left_Ventricle:IMR90:Mesenchymal_Stem_Cell	6.99449e-152	rs6499640:rs13333228:rs7186521:rs1421085;rs8044769:rs1421085:rs2058908:rs17218700:rs16952522:rs1421085;rs12446228:rs8044769:rs12446228:rs6499653;rs12921970:rs6499653	199
ENSG00000176842	IRX5	16	54964774	54968397	NA	NA	0	0	0	NA	NA	NA	NA	Yes	Adult_Cortex:Fetal_Cortex:Aorta:Hippocampus:Left_Ventricle:Liver:Right_Ventricle:GM12878:IMR90:Mesenchymal_Stem_Cell:Mesendoderm:Neural_Progenitor_Cell:Trophoblast-like_Cell:hESC	6.99449e-152	rs6499640:rs7186521:rs13333228:rs1421085;rs8044769:rs1421085;rs12446228:rs1421085:rs2058908:rs17218700:rs16952522:rs8044769:rs12446228:rs6499653;rs12921970:rs6499653	199
ENSG00000159387	IRX6	16	55357672	55364672	2.81616e-08	0.438476	0	0	0	NA	NA	NA	NA	Yes	Aorta:Left_Ventricle:Liver:Right_Ventricle:IMR90:Mesenchymal_Stem_Cell:Mesendoderm:Neural_Progenitor_Cell:Trophoblast-like_Cell:hESC	6.99449e-152	rs6499640:rs13333228:rs7186521:rs1421085;rs8044769:rs1421085:rs2058908:rs17218700:rs16952522:rs1421085;rs12446228:rs8044769:rs12446228:rs6499653;rs12921970:rs6499653:rs2895432	199;200
ENSG00000087253	LPCAT2	16	55542910	55620582	1.12519e-06	1.04294	0	0	0	NA	NA	NA	NA	Yes	IMR90:Mesenchymal_Stem_Cell:Mesendoderm:Trophoblast-like_Cell:hESC	6.99449e-152	rs6499640:rs13333228:rs7186521:rs1421085;rs8044769:rs1421085:rs2058908:rs17218700:rs16952522:rs1421085;rs12446228:rs8044769:rs12446228:rs6499653;rs12921970:rs6499653:rs1366544:rs4783962:rs6499861	199;200
ENSG00000205362	MT1A	16	56672578	56673999	0.00777619	0.386134	0	0	24	2.81245e-07	0.00102253	BRAINEAC/WHMT	NA	Yes	Left_Ventricle:Liver:GM12878:IMR90:Mesenchymal_Stem_Cell:Mesendoderm:Neural_Progenitor_Cell:Trophoblast-like_Cell:hESC	6.99449e-152	rs12596776;rs2895432:rs12596776:rs1366544:rs4783962:rs6499861:rs12446275:rs1421085;rs8044769:rs1421085:rs2058908:rs17218700:rs16952522:rs1421085;rs12446228:rs8044769:rs12446228:rs6499653;rs12921970:rs6499653:rs6499640:rs13333228:rs7186521	199;200
ENSG00000169715	MT1E	16	56659387	56661024	0.659213	-0.0899531	0	0	34	2.25712e-12	0	PsychENCODE_eQTLs:eQTLGen_cis_eQTLs:BIOSQTL/BIOS_eQTL_geneLevel:GTEx/v8/Muscle_Skeletal:GTEx/v8/Skin_Not_Sun_Exposed_Suprapubic	+	Yes	Left_Ventricle:Liver:GM12878:IMR90:Mesenchymal_Stem_Cell:Mesendoderm:Neural_Progenitor_Cell:Trophoblast-like_Cell:hESC	6.99449e-152	rs2895432;rs2895432:rs12596776:rs1366544:rs4783962:rs6499861:rs12446275:rs1421085;rs8044769:rs1421085:rs2058908:rs17218700:rs16952522:rs1421085;rs12446228:rs8044769:rs12446228:rs6499653;rs12921970:rs6499653:rs6499640:rs13333228:rs7186521	199;200
ENSG00000205364	MT1M	16	56666145	56667898	9.83544e-05	-0.29423	0	0	0	NA	NA	NA	NA	Yes	Left_Ventricle:Liver:GM12878:IMR90:Mesenchymal_Stem_Cell:Mesendoderm:Neural_Progenitor_Cell:Trophoblast-like_Cell:hESC	6.99449e-152	rs2895432:rs12596776:rs1366544:rs4783962:rs6499861:rs12446275:rs1421085;rs8044769:rs1421085:rs2058908:rs17218700:rs16952522:rs1421085;rs12446228:rs8044769:rs12446228:rs6499653;rs12921970:rs6499653:rs6499640:rs13333228:rs7186521	199;200
ENSG00000125148	MT2A	16	56642111	56643409	0.0538692	-0.424008	0	0	63	3.0949e-23	0	eQTLGen_cis_eQTLs:eQTLGen_trans_eQTLs:BRAINEAC/WHMT	+	Yes	Adult_Cortex:Fetal_Cortex:Left_Ventricle:Liver:GM12878:IMR90:Mesenchymal_Stem_Cell:Mesendoderm:Neural_Progenitor_Cell:Trophoblast-like_Cell:hESC	6.99449e-152	rs2895432;rs4784745;rs102275;rs8055138;rs151226;rs12596776;rs2895432:rs4783962:rs6499861:rs12596776:rs1366544:rs12446275:rs1421085;rs8044769:rs1421085:rs2058908:rs17218700:rs16952522:rs1421085;rs12446228:rs8044769:rs12446228:rs6499653;rs12921970:rs6499653:rs6499640:rs13333228:rs7186521	151;197;199;200
ENSG00000167005	NUDT21	16	56463045	56486111	0.947296	-0.951046	0	0	0	NA	NA	NA	NA	Yes	Left_Ventricle:Liver:Right_Ventricle:GM12878:IMR90:Mesenchymal_Stem_Cell:Mesendoderm:Trophoblast-like_Cell:hESC	6.99449e-152	rs2895432:rs1366544:rs4783962:rs6499861:rs12596776:rs12446275:rs6499640:rs13333228:rs7186521:rs1421085;rs8044769:rs1421085:rs2058908:rs17218700:rs16952522:rs1421085;rs12446228:rs8044769:rs12446228:rs6499653;rs12921970:rs6499653	199;200
ENSG00000087263	OGFOD1	16	56485402	56513012	1.29449e-08	1.03888	0	0	1	0.000105209	2.89269e-09	GTEx/v8/Adipose_Subcutaneous	NA	Yes	Left_Ventricle:Liver:Right_Ventricle:GM12878:IMR90:Mesenchymal_Stem_Cell:Mesendoderm:Trophoblast-like_Cell:hESC	6.99449e-152	rs12446275;rs2895432:rs1366544:rs4783962:rs6499861:rs12596776:rs12446275:rs6499640:rs13333228:rs7186521:rs1421085;rs8044769:rs1421085:rs2058908:rs17218700:rs16952522:rs1421085;rs12446228:rs8044769:rs12446228:rs6499653;rs12921970:rs6499653	199;200
ENSG00000103494	RPGRIP1L	16	53631595	53737850	1.19938e-18	-0.756693	0	0	6	9.06071e-05	0.009	CMC_SVA_cis:GTEx/v8/Thyroid	+	Yes	Fetal_Cortex:Aorta:Left_Ventricle:IMR90:Mesenchymal_Stem_Cell:Mesendoderm:Trophoblast-like_Cell:hESC	6.99449e-152	rs13333228;rs6499653;rs6499640:rs13333228:rs7186521:rs1421085;rs8044769:rs1421085:rs2058908:rs17218700:rs16952522:rs1421085;rs12446228:rs8044769:rs12446228:rs6499653;rs12921970:rs6499653	199
ENSG00000103546	SLC6A2	16	55689516	55740104	0.277118	-0.0574991	0	0	0	NA	NA	NA	NA	Yes	IMR90:Mesenchymal_Stem_Cell:Trophoblast-like_Cell	6.99449e-152	rs6499640:rs13333228:rs7186521:rs1421085;rs8044769:rs1421085:rs2058908:rs17218700:rs16952522:rs1421085;rs12446228:rs8044769:rs12446228:rs6499653;rs12921970:rs6499653	199
ENSG00000198464	ZNF480	19	52800430	52829175	2.3568e-07	-0.55409	0	0	6	2.7401e-06	0.0201152	eQTLGen_trans_eQTLs	+	No	NA	1.46069e-140	rs1421085;rs8044769	199
ENSG00000166971	AKTIP	16	53524952	53538323	0.788013	-0.341576	0	0	24	9.4836e-13	0	eQTLcatalogue/CEDAR_rectum:eQTLcatalogue/Lepik_2017_ge_blood:PsychENCODE_eQTLs:eQTLGen_cis_eQTLs:BIOSQTL/BIOS_eQTL_geneLevel	+	Yes	IMR90:Mesenchymal_Stem_Cell:Mesendoderm	1.00609e-94	rs6499640;rs7186521;rs13333228;rs2058908;rs6499640:rs13333228:rs7186521:rs1421085;rs8044769:rs12446228:rs6499653;rs12921970:rs6499653	199
ENSG00000083799	CYLD	16	50775961	50835846	0.99472	-1.96431	0	0	0	NA	NA	NA	NA	Yes	IMR90	1.00609e-94	rs6499640:rs13333228:rs7186521:rs1421085;rs8044769	199
ENSG00000198417	MT1F	16	56691606	56694610	0.0538497	-0.34497	0	0	39	9.8572e-18	0	eQTLGen_cis_eQTLs:BIOSQTL/BIOS_eQTL_geneLevel	+	Yes	Left_Ventricle:Liver:GM12878:IMR90:Mesenchymal_Stem_Cell:Mesendoderm:Trophoblast-like_Cell:hESC	1.00609e-94	rs12596776;rs1366544;rs2895432;rs6499640:rs13333228:rs7186521:rs1421085;rs8044769:rs12446228:rs6499653;rs12921970:rs6499653:rs2895432:rs1366544:rs4783962:rs6499861:rs12596776:rs12446275:rs4784745	199;200
ENSG00000125144	MT1G	16	56700643	56701977	0.00811948	0.102812	0	0	0	NA	NA	NA	NA	Yes	Left_Ventricle:Liver:GM12878:IMR90:Mesenchymal_Stem_Cell:Mesendoderm:Trophoblast-like_Cell:hESC	1.00609e-94	rs6499640:rs13333228:rs7186521:rs1421085;rs8044769:rs12446228:rs6499653;rs12921970:rs6499653:rs2895432:rs1366544:rs4783962:rs6499861:rs12596776:rs12446275:rs4784745	199;200
ENSG00000205358	MT1H	16	56703726	56705041	0.0548412	-0.294411	0	0	0	NA	NA	NA	NA	Yes	Left_Ventricle:Liver:GM12878:IMR90:Mesenchymal_Stem_Cell:Mesendoderm:Trophoblast-like_Cell:hESC	1.00609e-94	rs6499640:rs13333228:rs7186521:rs1421085;rs8044769:rs12446228:rs6499653;rs12921970:rs6499653:rs2895432:rs1366544:rs4783962:rs6499861:rs12596776:rs12446275:rs4784745	199;200
ENSG00000187193	MT1X	16	56716336	56718108	0.0496112	0.296377	0	0	13	6.6654e-11	0	eQTLGen_cis_eQTLs	+	Yes	Left_Ventricle:Liver:GM12878:IMR90:Mesenchymal_Stem_Cell:Mesendoderm:Trophoblast-like_Cell:hESC	1.00609e-94	rs12596776;rs6499640:rs13333228:rs7186521:rs1421085;rs8044769:rs12446228:rs6499653;rs12921970:rs6499653:rs2895432:rs1366544:rs4783962:rs6499861:rs12596776:rs12446275:rs4784745	199;200
ENSG00000102900	NUP93	16	56764017	56878797	0.00486804	NA	32	21.8	4	1.20631e-05	0.030772	PsychENCODE_eQTLs:DICE/T_CD4_naive_TREG:GTEx/v8/Muscle_Skeletal	-	Yes	Aorta:Left_Ventricle:Liver:Right_Ventricle:Spleen:GM12878:IMR90:Mesenchymal_Stem_Cell:Mesendoderm:Neural_Progenitor_Cell:Trophoblast-like_Cell:hESC	1.00609e-94	rs2895432;rs4783962;rs2895432:rs12446275:rs12596776:rs1366544:rs4783962:rs6499861:rs4784745:rs6499640:rs13333228:rs7186521:rs1421085;rs8044769	199;200
ENSG00000166603	MC4R	18	58038564	58040001	1.53625e-05	-0.244993	24	11.96	291	1.14561e-10	2.74037e-08	PsychENCODE_eQTLs:CMC_SVA_cis:CMC_NoSVA_cis:GTEx/v8/Ovary:GTEx/v8/Testis	-	Yes	Aorta:Left_Ventricle:Liver:GM12878:IMR90:Mesenchymal_Stem_Cell:Mesendoderm:Neural_Progenitor_Cell:Trophoblast-like_Cell:hESC	3.08792e-66	rs17066856;rs7240064;rs9947450;rs1943226;rs2000746;rs9966951;rs8086627;rs2331841;rs12967135;rs11660783;rs11152214;rs489693;rs9947403;rs9956279;rs8086627:rs12967135;rs11660783:rs9966951:rs2045442:rs9956907:rs9956279:rs2000746:rs2331841:rs2331841;rs11152214:rs12967135:rs12967135;rs9947403:rs489693;rs9947403:rs9319962:rs9947403:rs9961247	220
ENSG00000103479	RBL2	16	53467889	53525561	0.957797	-0.466961	0	0	42	1.4842e-42	0	PsychENCODE_eQTLs:eQTLGen_cis_eQTLs:GTEx/v8/Adipose_Subcutaneous:GTEx/v8/Adipose_Visceral_Omentum:GTEx/v8/Artery_Aorta:GTEx/v8/Artery_Tibial:GTEx/v8/Brain_Caudate_basal_ganglia:GTEx/v8/Brain_Cerebellar_Hemisphere:GTEx/v8/Brain_Cerebellum:GTEx/v8/Brain_Cortex:GTEx/v8/Breast_Mammary_Tissue:GTEx/v8/Colon_Transverse:GTEx/v8/Esophagus_Gastroesophageal_Junction:GTEx/v8/Esophagus_Mucosa:GTEx/v8/Esophagu…	-	No	NA	7.51668e-65	rs13333228;rs2058908;rs6499640;rs7186521;rs12446228;rs16952522;rs17218700;rs8044769	199
ENSG00000134444	KIAA1468	18	59854491	59974355	1	-0.173207	0	0	0	NA	NA	NA	NA	Yes	Mesenchymal_Stem_Cell:Mesendoderm:hESC	7.94256e-65	rs8086627:rs12967135;rs9966951;rs11660783:rs9966951:rs2331841:rs2331841;rs11152214:rs12967135:rs12967135;rs489693;rs9947403:rs489693;rs9947403:rs9319962:rs9947403	220
ENSG00000197563	PIGN	18	59710800	59854351	9.0206e-16	-0.038638	0	0	0	NA	NA	NA	NA	Yes	Mesenchymal_Stem_Cell:Mesendoderm:hESC	7.94256e-65	rs8086627:rs12967135;rs9966951;rs11660783:rs9966951:rs2331841:rs2331841;rs11152214:rs12967135:rs12967135;rs489693;rs9947403:rs489693;rs9947403:rs9319962:rs9947403	220
ENSG00000141682	PMAIP1	18	57567180	57571538	0.461951	1.38597	0	0	0	NA	NA	NA	NA	Yes	IMR90:Mesenchymal_Stem_Cell:Mesendoderm:hESC	7.94256e-65	rs8086627:rs12967135;rs9966951;rs11660783:rs9966951:rs2331841:rs2331841;rs11152214:rs12967135:rs12967135;rs489693;rs9947403:rs489693;rs9947403:rs9319962:rs9947403:rs2045442:rs9956907:rs9961247	220
ENSG00000176641	RNF152	18	59475296	59561480	0.00705385	1.59207	0	0	0	NA	NA	NA	NA	Yes	Left_Ventricle:Mesenchymal_Stem_Cell:Mesendoderm:hESC	7.94256e-65	rs2331841:rs2331841;rs11152214:rs12967135:rs12967135;rs489693;rs9947403:rs489693;rs9947403:rs9319962:rs9947403:rs8086627:rs12967135;rs9966951;rs11660783:rs9966951	220
ENSG00000189292	FAM150B	2	279558	288851	0.384938	NA	0	0	256	7.0022e-27	0	eQTLGen_cis_eQTLs:BRAINEAC/WHMT:GTEx/v8/Adipose_Subcutaneous:GTEx/v8/Artery_Tibial:GTEx/v8/Skin_Sun_Exposed_Lower_leg:GTEx/v8/Spleen	-	Yes	Promoter_anchored_loops:Spleen:IMR90:Mesendoderm:Neural_Progenitor_Cell:Trophoblast-like_Cell:hESC	1.0221e-52	rs2685230;rs7571872;rs6710140;rs1317005;rs7601028;rs12996547;rs7601028:rs4611674:rs2685230:rs10209658	26
ENSG00000035115	SH3YL1	2	217730	266398	1.00024e-05	-0.103902	0	0	271	2.6971e-56	0	eQTLGen_cis_eQTLs:BRAINEAC/CRBL:BRAINEAC/OCTX	-	No	NA	1.0221e-52	rs2685230;rs7601028;rs10185713;rs7571872;rs4611674;rs6710140;rs10188118;rs13029479;rs1317005;rs12999373	26
ENSG00000184731	FAM110C	2	38814	46870	8.70817e-08	0.00744277	0	0	0	NA	NA	NA	NA	Yes	IMR90:Mesenchymal_Stem_Cell:Mesendoderm:hESC	6.14188e-49	rs2685230:rs7601028	26
ENSG00000115705	TPO	2	1377995	1547483	1.35597e-07	0.590394	0	0	0	NA	NA	NA	NA	Yes	IMR90:Mesenchymal_Stem_Cell	6.14188e-49	rs2685230:rs10209658:rs7601028:rs12999373	26
ENSG00000147408	CSGALNACT1	8	19261672	19615540	6.87751e-05	0.406271	0	0	355	1.3075e-185	0	eQTLcatalogue/BLUEPRINT_ge_monocyte:eQTLcatalogue/BLUEPRINT_ge_neutrophil:eQTLcatalogue/Fairfax_2014_naive:eQTLcatalogue/Lepik_2017_ge_blood:eQTLcatalogue/Naranbhai_2015_neutrophil_CD16:eQTLGen_cis_eQTLs:eQTLGen_trans_eQTLs:BIOSQTL/BIOS_eQTL_geneLevel:GTEx/v8/Whole_Blood:GTEx/v8/Artery_Aorta:GTEx/v8/Testis	-	Yes	Left_Ventricle:IMR90:Mesenchymal_Stem_Cell:Mesendoderm:Trophoblast-like_Cell:hESC	2.3024e-43	rs10749625;rs6586872;rs7836748;rs11204072;rs1441778;rs12543154;rs10102717;rs264;rs894210;rs320;rs9644568;rs10096633;rs9644636;rs3289;rs6999158;rs4557718;rs6586891;rs13273470;rs13263508;rs7184567;rs11150596;rs6586872:rs10749625:rs11204072:rs10096633:rs320:rs9644568;rs10096633:rs894210:rs7005359:rs3289:rs6999158:rs9644568	121;198
ENSG00000175445	LPL	8	19759228	19824769	3.33728e-06	1.04718	267	50	599	3.27170000000001e-310	0	eQTLcatalogue/BLUEPRINT_ge_monocyte:eQTLcatalogue/CEDAR_monocyte_CD14:eQTLcatalogue/Fairfax_2014_naive:eQTLcatalogue/Lepik_2017_ge_blood:eQTLcatalogue/Quach_2016_ge_monocyte_IAV:eQTLcatalogue/Quach_2016_ge_monocyte_LPS:eQTLcatalogue/Quach_2016_ge_monocyte_naive:eQTLcatalogue/Quach_2016_ge_monocyte_Pam3CSK4:eQTLcatalogue/Quach_2016_ge_monocyte_R848:eQTLcatalogue/TwinsUK_ge_blood:eQTLcatalogue/Twin…	-	No	NA	2.3024e-43	rs7016529;rs3898938;rs12543154;rs10102717;rs264;rs283;rs894210;rs320;rs4922115;rs301;rs9644568;rs10096633;rs3289;rs9644636;rs7005359;rs10749625;rs6999158;rs11992311;rs4922119;rs11204072;rs1441778;rs7836748;rs6586872;rs2410622;rs6586891;rs4557718;rs13263508;rs13273470	121
ENSG00000007944	MYLIP	6	16129356	16148479	0.0202269	NA	0	0	25	3.6079e-14	0	eQTLGen_trans_eQTLs	-	No	NA	4.15814e-43	rs7586601;rs4665991;rs13244268;rs320;rs9644568;rs10096633;rs10808546	29;110;121;129
ENSG00000147416	ATP6V1B2	8	20054878	20084330	0.991449	-0.74185	0	0	32	4.2452e-06	0.012165	eQTLGen_cis_eQTLs:CMC_SVA_cis	-	Yes	EP_correlation_organ_oneway:Adult_Cortex:Fetal_Cortex:Left_Ventricle:Liver:IMR90:Mesenchymal_Stem_Cell:Mesendoderm:Trophoblast-like_Cell:hESC	4.15814e-43	rs9644568;rs10096633;rs320;rs9644568:rs6586872:rs7016529:rs264:rs10749625:rs11204072:rs12543154:rs3898938:rs9644568;rs10096633:rs4922115:rs320:rs3289:rs894210:rs10096633:rs7005359	121
ENSG00000104613	INTS10	8	19674651	19709594	0.984217	NA	16	14.99	304	2.7569e-173	0	eQTLcatalogue/BLUEPRINT_ge_monocyte:eQTLcatalogue/BLUEPRINT_ge_neutrophil:eQTLcatalogue/BLUEPRINT_ge_T-cell:eQTLcatalogue/Fairfax_2014_naive:eQTLcatalogue/GEUVADIS_ge_LCL:eQTLcatalogue/Kasela_2017_T-cell_CD4:eQTLcatalogue/Lepik_2017_ge_blood:eQTLcatalogue/Quach_2016_ge_monocyte_LPS:eQTLcatalogue/Quach_2016_ge_monocyte_naive:PsychENCODE_eQTLs:DICE/T_CD4_naive:DICE/T_CD4_TH1:DICE/T_CD4_TH17:DICE/T_…	-	Yes	Left_Ventricle:GM12878:IMR90:Mesenchymal_Stem_Cell:Mesendoderm:Trophoblast-like_Cell:hESC	4.15814e-43	rs11204072;rs10749625;rs6586872;rs12543154;rs10102717;rs1441778;rs9644568;rs10096633;rs7836748;rs3898938;rs264;rs894210;rs4922115;rs3289;rs7005359;rs6586891;rs6999158;rs4557718;rs13263508;rs13273470;rs6586872:rs11204072:rs7016529:rs264:rs9644568;rs10096633:rs4922115:rs320:rs3289:rs894210:rs9644568:rs10096633:rs7005359:rs6999158:rs6586891:rs13263508:rs13273470	121
ENSG00000036565	SLC18A1	8	20002366	20040717	1.88883e-14	0.247528	0	0	124	2.9104e-22	0	PsychENCODE_eQTLs:eQTLGen_cis_eQTLs:BIOSQTL/BIOS_eQTL_geneLevel	-	Yes	EP_correlation_cell_type_oneway:Left_Ventricle:Liver:IMR90:Mesenchymal_Stem_Cell:Mesendoderm:Trophoblast-like_Cell:hESC	4.15814e-43	rs9644568;rs10096633;rs3898938;rs264;rs3289;rs7005359;rs6999158;rs6586891;rs9644568:rs6586872:rs10749625:rs11204072:rs12543154:rs7016529:rs3898938:rs264:rs9644568;rs10096633:rs4922115:rs320:rs3289:rs894210:rs10096633:rs7005359	121
ENSG00000165029	ABCA1	9	107543283	107690518	0.0016588	0.0827742	39	14.99	70	6.8351e-14	0	eQTLcatalogue/CEDAR_B-cell_CD19:eQTLGen_cis_eQTLs:eQTLGen_trans_eQTLs	-	Yes	EP_correlation_cell_type_oneway:EP_correlation_organ_oneway:Adult_Cortex:Fetal_Cortex:Liver:IMR90:Mesenchymal_Stem_Cell:Mesendoderm:hESC	4.15814e-43	rs2275543;rs7586601;rs9644568;rs10096633;rs320;rs102275	29;121;133;151
ENSG00000160179	ABCG1	21	43619799	43717354	0.358876	NA	0	0	26	1.7778e-10	0	eQTLGen_trans_eQTLs	-	No	NA	4.15814e-43	rs4665991;rs320;rs102275	29;121;151
ENSG00000171428	NAT1	8	18027986	18081198	2.8541e-10	1.83465	0	0	0	NA	NA	NA	NA	Yes	IMR90:Mesenchymal_Stem_Cell	4.95824e-43	rs6586872:rs10096633:rs320:rs9644568;rs10096633:rs894210:rs7005359	121
ENSG00000104611	SH2D4A	8	19171128	19253729	1.53114e-18	-0.0833182	0	0	21	3.78571e-06	0.049	DICE/T_CD8_naive	+	Yes	Left_Ventricle:IMR90:Mesenchymal_Stem_Cell:Mesendoderm:Trophoblast-like_Cell:hESC	4.95824e-43	rs4922115;rs10749625:rs11204072:rs6586872:rs12543154:rs7016529:rs3898938:rs10096633:rs320:rs9644568;rs10096633:rs894210:rs7005359:rs3289:rs6999158:rs9644568:rs6586891:rs13263508:rs13273470	121
ENSG00000166562	SEC11C	18	56806709	56826068	0.694288	-0.032677	0	0	7	1.56522e-05	0.0428391	GTEx/v8/Pancreas	-	No	NA	3.40608e-38	rs9966951	220
ENSG00000120341	SEC16B	1	177893091	177953438	4.43622e-13	-0.216202	41	15.31	40	3.7811e-07	5.65353e-29	PsychENCODE_eQTLs:GTEx/v8/Artery_Coronary:GTEx/v8/Esophagus_Mucosa:GTEx/v8/Heart_Left_Ventricle:GTEx/v8/Muscle_Skeletal:GTEx/v8/Nerve_Tibial:GTEx/v8/Pancreas:GTEx/v8/Pituitary:GTEx/v8/Skin_Not_Sun_Exposed_Suprapubic:GTEx/v8/Testis	+	No	NA	1.85541e-37	rs8030;rs545608;rs10798583;rs623479;rs591120;rs10798585;rs12135579;rs1854288;rs1359940;rs12760319	21
ENSG00000183287	CCBE1	18	57098172	57364612	1.66522e-06	0.814862	0	0	0	NA	NA	NA	NA	Yes	Mesenchymal_Stem_Cell	5.11997e-37	rs9966951	220
ENSG00000141655	TNFRSF11A	18	59992520	60058516	0.879917	2.37876	0	0	0	NA	NA	NA	NA	Yes	IMR90:Mesenchymal_Stem_Cell	5.11997e-37	rs9966951	220
ENSG00000152092	ASTN1	1	176826438	177134109	0.999416	-0.346376	0	0	0	NA	NA	NA	NA	Yes	Left_Ventricle:Liver:IMR90:Mesenchymal_Stem_Cell:Mesendoderm:Neural_Progenitor_Cell:Trophoblast-like_Cell:hESC	9.63121e-37	rs12135579:rs4081366:rs1854288:rs12760319:rs8030:rs545608;rs12760319:rs545608	21
ENSG00000198797	BRINP2	1	177140633	177251558	0.999086	-0.807649	0	0	0	NA	NA	NA	NA	Yes	Left_Ventricle:Liver:IMR90:Mesenchymal_Stem_Cell:Mesendoderm:Neural_Progenitor_Cell:Trophoblast-like_Cell:hESC	9.63121e-37	rs12135579:rs4081366:rs1854288:rs12760319:rs8030:rs545608;rs12760319:rs545608	21
ENSG00000116161	CACYBP	1	174968300	174980851	0.943387	0.304527	0	0	0	NA	NA	NA	NA	Yes	IMR90:Mesenchymal_Stem_Cell	9.63121e-37	rs8030:rs545608	21
ENSG00000116199	FAM20B	1	178994939	179045697	0.285814	2.26297	0	0	0	NA	NA	NA	NA	Yes	Left_Ventricle:IMR90:Mesenchymal_Stem_Cell:Mesendoderm:hESC	9.63121e-37	rs8030:rs545608	21
ENSG00000235750	KIAA0040	1	175126123	175162135	NA	NA	0	0	0	NA	NA	NA	NA	Yes	IMR90:Mesenchymal_Stem_Cell:Mesendoderm:Trophoblast-like_Cell	9.63121e-37	rs12135579:rs4081366:rs1854288:rs12760319:rs545608;rs12760319:rs8030:rs545608	21
ENSG00000120333	MRPS14	1	174979925	174992561	0.00165874	-0.0352662	0	0	0	NA	NA	NA	NA	Yes	IMR90:Mesenchymal_Stem_Cell	9.63121e-37	rs8030:rs545608	21
ENSG00000116183	PAPPA2	1	176432307	176814735	0.00125005	0.692747	0	0	0	NA	NA	NA	NA	Yes	Aorta:Left_Ventricle:Liver:IMR90:Mesenchymal_Stem_Cell:Mesendoderm:Trophoblast-like_Cell:hESC	9.63121e-37	rs12135579:rs4081366:rs1854288:rs12760319:rs545608;rs12760319:rs8030:rs545608	21
ENSG00000143207	RFWD2	1	175913967	176176629	0.998566	NA	0	0	0	NA	NA	NA	NA	Yes	IMR90:Mesenchymal_Stem_Cell	9.63121e-37	rs8030:rs545608	21
ENSG00000116147	TNR	1	175284330	175712906	0.987763	-0.801831	0	0	0	NA	NA	NA	NA	Yes	IMR90:Mesenchymal_Stem_Cell	9.63121e-37	rs8030:rs12135579:rs4081366:rs1854288:rs12760319:rs545608	21
ENSG00000079459	FDFT1	8	11653082	11696818	NA	1.28566	0	0	27	2.358e-09	7.36377e-05	eQTLGen_trans_eQTLs	+	No	NA	9.69412e-36	rs9644568;rs102275	121;151
ENSG00000135336	ORC3	6	88299839	88377169	0.000309997	0.334822	0	0	68	7.23857e-20	4.37619e-12	xQTLServer_eQTLs	NA	No	NA	1.86371e-35	rs8055138;rs7500321	197
ENSG00000184730	APOBR	16	28505970	28510291	6.29744e-06	-0.104221	17	16.07	432	2.8611e-87	0	eQTLcatalogue/GEUVADIS_ge_LCL:eQTLcatalogue/TwinsUK_ge_LCL:DICE/T_CD4_naive:DICE/T_CD8_naive:DICE/T_CD4_TFH:DICE/T_CD4_TH17:DICE/T_CD4_memory_TREG:eQTLGen_cis_eQTLs:GTEx/v8/Adipose_Subcutaneous:GTEx/v8/Muscle_Skeletal:GTEx/v8/Thyroid	+	No	NA	1.86371e-35	rs8055138;rs151226;rs2726034;rs7500321;rs9939450;rs2726039;rs12448482	197
ENSG00000196296	ATP2A1	16	28889726	28915830	7.03975e-09	-0.198598	47	18.68	394	4.41445e-34	0	eQTLcatalogue/GEUVADIS_ge_LCL:eQTLcatalogue/TwinsUK_ge_LCL:eQTLcatalogue/TwinsUK_ge_skin:DICE/B_cell_naive:DICE/Monocyte_non_classical:DICE/T_CD4_TFH:DICE/T_CD4_memory_TREG:eQTLGen_cis_eQTLs:BIOSQTL/BIOS_eQTL_geneLevel:GTEx/v8/Whole_Blood:GTEx/v8/Brain_Hypothalamus:GTEx/v8/Colon_Transverse:GTEx/v8/Muscle_Skeletal:GTEx/v8/Pituitary:GTEx/v8/Skin_Not_Sun_Exposed_Suprapubic:GTEx/v8/Skin_Sun_Exposed_L…	+	Yes	Adult_Cortex:Fetal_Cortex:GM12878:IMR90:Mesenchymal_Stem_Cell:Mesendoderm	1.86371e-35	rs12448482;rs8055138;rs7500321;rs2726034;rs151226;rs8055138:rs151226:rs12448482:rs3814883:rs7186852:rs8055138;rs7500321:rs7500321:rs8063565	197;198
ENSG00000168488	ATXN2L	16	28834356	28848558	0.99995	NA	56	10.05	340	2.1e-23	0	eQTLcatalogue/BLUEPRINT_ge_neutrophil:eQTLcatalogue/TwinsUK_ge_fat:eQTLGen_cis_eQTLs:BIOSQTL/BIOS_eQTL_geneLevel:GTEx/v8/Adipose_Subcutaneous:GTEx/v8/Adipose_Visceral_Omentum:GTEx/v8/Whole_Blood:GTEx/v8/Testis	-	Yes	Adult_Cortex:Fetal_Cortex:GM12878:IMR90	1.86371e-35	rs8055138;rs12448482;rs2726039;rs151226;rs7500321;rs2726034;rs8055138:rs151226:rs12448482:rs4787491:rs3814883:rs3814883;rs4787491:rs7186852:rs7500321:rs8063565;rs7186852:rs8047664:rs8063565	197;198
ENSG00000176476	CCDC101	16	28565236	28603111	0.867208	-0.543805	76	25	478	3.27170000000001e-310	0	eQTLcatalogue/BLUEPRINT_ge_monocyte:eQTLcatalogue/BLUEPRINT_ge_neutrophil:eQTLcatalogue/BLUEPRINT_ge_T-cell:eQTLcatalogue/CEDAR_B-cell_CD19:eQTLcatalogue/CEDAR_ileum:eQTLcatalogue/CEDAR_monocyte_CD14:eQTLcatalogue/CEDAR_neutrophil_CD15:eQTLcatalogue/CEDAR_T-cell_CD4:eQTLcatalogue/CEDAR_T-cell_CD8:eQTLcatalogue/Fairfax_2012_B-cell_CD19:eQTLcatalogue/Fairfax_2014_LPS24:eQTLcatalogue/Fairfax_2014_LP…	+	Yes	Promoter_anchored_loops:IMR90:Mesenchymal_Stem_Cell:Mesendoderm	1.86371e-35	rs8055138;rs151226;rs9939450;rs2726039;rs2726034;rs12448482;rs7500321;rs8055138:rs9939450:rs151226	197
ENSG00000188603	CLN3	16	28477983	28506896	9.99316e-07	NA	30	16.07	414	1.6057e-119	0	eQTLcatalogue/BLUEPRINT_ge_monocyte:eQTLcatalogue/BLUEPRINT_ge_neutrophil:eQTLcatalogue/Fairfax_2014_naive:eQTLcatalogue/Lepik_2017_ge_blood:eQTLcatalogue/Quach_2016_ge_monocyte_LPS:eQTLcatalogue/Quach_2016_ge_monocyte_naive:eQTLcatalogue/Quach_2016_ge_monocyte_R848:eQTLcatalogue/TwinsUK_ge_fat:eQTLcatalogue/TwinsUK_ge_LCL:DICE/T_CD4_TH17:DICE/T_CD4_TH2:eQTLGen_cis_eQTLs:BIOSQTL/BIOS_eQTL_geneLev…	+	No	NA	1.86371e-35	rs8055138;rs151226;rs12448482;rs7500321;rs2726034;rs9939450;rs2726039	197
ENSG00000184110	EIF3C	16	28699879	28747051	0.343303	-0.796798	12	6.886	468	1.00339e-84	0	eQTLcatalogue/BrainSeq_ge_brain:eQTLcatalogue/GENCORD_ge_fibroblast:eQTLcatalogue/GEUVADIS_ge_LCL:eQTLcatalogue/HipSci_ge_iPSC:eQTLcatalogue/Lepik_2017_ge_blood:eQTLcatalogue/TwinsUK_ge_blood:eQTLcatalogue/TwinsUK_ge_fat:eQTLcatalogue/van_de_Bunt_2015_ge_pancreatic_islet:PsychENCODE_eQTLs:eQTLGen_cis_eQTLs:BIOSQTL/BIOS_eQTL_geneLevel:xQTLServer_eQTLs:GTEx/v8/Adipose_Subcutaneous:GTEx/v8/Adipose_V…	+	No	NA	1.86371e-35	rs8055138;rs7500321;rs2726034;rs12448482;rs151226;rs2726039	197
ENSG00000205609	EIF3CL	16	28390900	28415200	NA	-0.717156	16	9.249	427	3.5845e-153	0	eQTLcatalogue/Fairfax_2014_naive:eQTLcatalogue/GENCORD_ge_fibroblast:eQTLcatalogue/HipSci_ge_iPSC:eQTLcatalogue/Lepik_2017_ge_blood:eQTLcatalogue/TwinsUK_ge_blood:eQTLcatalogue/TwinsUK_ge_fat:eQTLcatalogue/TwinsUK_ge_skin:PsychENCODE_eQTLs:eQTLGen_cis_eQTLs:BIOSQTL/BIOS_eQTL_geneLevel:GTEx/v8/Artery_Aorta:GTEx/v8/Artery_Tibial:GTEx/v8/Esophagus_Muscularis:GTEx/v8/Muscle_Skeletal:GTEx/v8/Nerve_Tib…	+	No	NA	1.86371e-35	rs8055138;rs2726034;rs7500321;rs12448482;rs151226;rs9939450;rs2726039	197
ENSG00000197272	IL27	16	28510683	28523372	0.927793	-0.19185	27	16.07	397	4.29877e-36	0	eQTLcatalogue/BLUEPRINT_ge_monocyte:PsychENCODE_eQTLs:eQTLGen_cis_eQTLs:BIOSQTL/BIOS_eQTL_geneLevel:GTEx/v8/Whole_Blood:GTEx/v8/Liver:GTEx/v8/Testis	+	No	NA	1.86371e-35	rs8055138;rs151226;rs2726034;rs9939450;rs2726039;rs7500321;rs12448482	197
ENSG00000213658	LAT	16	28996147	29002104	0.0974333	-0.483408	13	13.34	377	1.45482e-24	0	BIOSQTL/BIOS_eQTL_geneLevel:GTEx/v8/Adipose_Subcutaneous:GTEx/v8/Artery_Aorta:GTEx/v8/Artery_Tibial:GTEx/v8/Brain_Anterior_cingulate_cortex_BA24:GTEx/v8/Brain_Cortex:GTEx/v8/Brain_Frontal_Cortex_BA9:GTEx/v8/Brain_Nucleus_accumbens_basal_ganglia:GTEx/v8/Brain_Putamen_basal_ganglia:GTEx/v8/Colon_Sigmoid:GTEx/v8/Colon_Transverse:GTEx/v8/Esophagus_Gastroesophageal_Junction:GTEx/v8/Esophagus_Mucosa:GT…	+	Yes	Left_Ventricle:GM12878:IMR90:Mesenchymal_Stem_Cell:Mesendoderm	1.86371e-35	rs12448482;rs7500321;rs8055138;rs151226;rs2726039;rs2726034;rs9939450;rs7186852:rs8063565:rs8055138:rs12448482:rs8055138;rs7500321:rs4787480:rs8063565;rs7186852:rs8047664	197;198
ENSG00000176953	NFATC2IP	16	28962128	28978418	0.00232735	-0.714147	23	13.14	456	8.39374e-19	0	eQTLcatalogue/BLUEPRINT_ge_neutrophil:eQTLcatalogue/BLUEPRINT_ge_T-cell:eQTLcatalogue/CEDAR_rectum:eQTLcatalogue/CEDAR_transverse_colon:eQTLcatalogue/GENCORD_ge_LCL:eQTLcatalogue/GEUVADIS_ge_LCL:eQTLcatalogue/TwinsUK_ge_skin:PsychENCODE_eQTLs:DICE/T_CD4_TH17:DICE/T_CD4_TH1_17:DICE/T_CD4_TH2:eQTLGen_cis_eQTLs:BIOSQTL/BIOS_eQTL_geneLevel:CMC_SVA_cis:CMC_NoSVA_cis:GTEx/v8/Adipose_Subcutaneous:GTEx/v…	+	Yes	Promoter_anchored_loops:Adult_Cortex:Fetal_Cortex:Left_Ventricle:GM12878:IMR90:Mesenchymal_Stem_Cell:Mesendoderm	1.86371e-35	rs8055138;rs7500321;rs12448482;rs2726034;rs151226;rs9939450;rs2726039;rs8055138:rs151226:rs12448482:rs3814883:rs3814883;rs4787491:rs7186852:rs8063565:rs8055138;rs7500321:rs4787480:rs8063565;rs7186852:rs8047664	197;198
ENSG00000198156	NPIPB6	16	28353876	28374829	0.636137	-0.629005	19	3.884	441	1.75034e-47	0	eQTLcatalogue/Quach_2016_ge_monocyte_IAV:PsychENCODE_eQTLs:eQTLGen_cis_eQTLs:BIOSQTL/BIOS_eQTL_geneLevel:GTEx/v8/Adipose_Subcutaneous:GTEx/v8/Whole_Blood:GTEx/v8/Brain_Anterior_cingulate_cortex_BA24:GTEx/v8/Brain_Caudate_basal_ganglia:GTEx/v8/Brain_Cerebellar_Hemisphere:GTEx/v8/Brain_Cerebellum:GTEx/v8/Brain_Nucleus_accumbens_basal_ganglia:GTEx/v8/Colon_Transverse:GTEx/v8/Pituitary:GTEx/v8/Cells_…	+	No	NA	1.86371e-35	rs8055138;rs2726034;rs151226;rs7500321;rs12448482;rs2726039;rs9939450	197
ENSG00000233232	NPIPB7	16	28467693	28481868	0.151767	NA	10	6.505	375	3.31465e-62	1.04686e-58	PsychENCODE_eQTLs:BIOSQTL/BIOS_eQTL_geneLevel:GTEx/v8/Adipose_Subcutaneous:GTEx/v8/Adipose_Visceral_Omentum:GTEx/v8/Whole_Blood:GTEx/v8/Artery_Aorta:GTEx/v8/Artery_Coronary:GTEx/v8/Artery_Tibial:GTEx/v8/Brain_Amygdala:GTEx/v8/Brain_Anterior_cingulate_cortex_BA24:GTEx/v8/Brain_Caudate_basal_ganglia:GTEx/v8/Brain_Cerebellar_Hemisphere:GTEx/v8/Brain_Cerebellum:GTEx/v8/Brain_Cortex:GTEx/v8/Brain_Fron…	-	No	NA	1.86371e-35	rs8055138;rs9939450;rs2726039;rs151226;rs2726034;rs12448482;rs7500321	197
ENSG00000255524	NPIPB8	16	28648975	28670003	0.0142295	NA	18	17.13	475	2.13511e-53	0	eQTLcatalogue/CEDAR_monocyte_CD14:eQTLcatalogue/CEDAR_neutrophil_CD15:eQTLcatalogue/CEDAR_rectum:eQTLcatalogue/CEDAR_T-cell_CD8:eQTLcatalogue/Fairfax_2014_LPS24:eQTLcatalogue/Kasela_2017_T-cell_CD4:eQTLcatalogue/Kasela_2017_T-cell_CD8:eQTLcatalogue/Naranbhai_2015_neutrophil_CD16:BIOSQTL/BIOS_eQTL_geneLevel:GTEx/v8/Testis	-	No	NA	1.86371e-35	rs8055138;rs2726034;rs2726039;rs151226;rs12448482;rs7500321;rs9939450	197
ENSG00000196993	NPIPB9	16	28763108	28784128	NA	NA	8	6.886	390	3.30451e-73	0	PsychENCODE_eQTLs:BIOSQTL/BIOS_eQTL_geneLevel:GTEx/v8/Adipose_Subcutaneous:GTEx/v8/Adipose_Visceral_Omentum:GTEx/v8/Artery_Aorta:GTEx/v8/Artery_Coronary:GTEx/v8/Artery_Tibial:GTEx/v8/Brain_Amygdala:GTEx/v8/Brain_Caudate_basal_ganglia:GTEx/v8/Brain_Cerebellar_Hemisphere:GTEx/v8/Brain_Cerebellum:GTEx/v8/Brain_Cortex:GTEx/v8/Brain_Frontal_Cortex_BA9:GTEx/v8/Brain_Hippocampus:GTEx/v8/Brain_Nucleus_ac…	-	No	NA	1.86371e-35	rs8055138;rs151226;rs2726034;rs12448482;rs7500321;rs9939450;rs2726039	197
ENSG00000176046	NUPR1	16	28548606	28550495	0.00754109	0.514991	25	14.97	378	1.9523e-41	1.0625e-34	eQTLcatalogue/BrainSeq_ge_brain:PsychENCODE_eQTLs:eQTLGen_cis_eQTLs:BIOSQTL/BIOS_eQTL_geneLevel:GTEx/v8/Artery_Aorta:GTEx/v8/Artery_Tibial:GTEx/v8/Brain_Cerebellar_Hemisphere:GTEx/v8/Brain_Cerebellum:GTEx/v8/Esophagus_Gastroesophageal_Junction:GTEx/v8/Esophagus_Muscularis:GTEx/v8/Heart_Left_Ventricle:GTEx/v8/Lung:GTEx/v8/Muscle_Skeletal:GTEx/v8/Nerve_Tibial:GTEx/v8/Ovary:GTEx/v8/Skin_Not_Sun_Expo…	-	Yes	Promoter_anchored_loops:Adult_Cortex:Fetal_Cortex:Liver:GM12878:IMR90:Mesenchymal_Stem_Cell	1.86371e-35	rs8055138;rs151226;rs2726034;rs7500321;rs9939450;rs2726039;rs12448482;rs8055138:rs151226:rs12448482:rs4787491:rs3814883;rs4787491:rs3814883:rs9939450	197;198
ENSG00000177548	RABEP2	16	28915742	28947847	0.00273664	-0.555493	32	10.87	308	2.30365e-07	0.000163675	eQTLGen_cis_eQTLs:BIOSQTL/BIOS_eQTL_geneLevel:CMC_SVA_cis:GTEx/v8/Adrenal_Gland:GTEx/v8/Pituitary:GTEx/v8/Skin_Not_Sun_Exposed_Suprapubic:GTEx/v8/Skin_Sun_Exposed_Lower_leg	+	Yes	Promoter_anchored_loops:GM12878:IMR90:Mesenchymal_Stem_Cell	1.86371e-35	rs8055138;rs12448482;rs7500321;rs151226;rs2726034;rs8055138:rs12448482:rs7500321	197
ENSG00000188322	SBK1	16	28303840	28335170	0.437577	0.472517	22	13.33	401	3.0132e-70	0	eQTLcatalogue/TwinsUK_ge_skin:eQTLGen_cis_eQTLs:BIOSQTL/BIOS_eQTL_geneLevel:GTEx/v8/Artery_Aorta:GTEx/v8/Artery_Tibial:GTEx/v8/Colon_Transverse:GTEx/v8/Esophagus_Mucosa:GTEx/v8/Esophagus_Muscularis:GTEx/v8/Pancreas:GTEx/v8/Skin_Not_Sun_Exposed_Suprapubic:GTEx/v8/Skin_Sun_Exposed_Lower_leg:GTEx/v8/Small_Intestine_Terminal_Ileum:GTEx/v8/Stomach:GTEx/v8/Thyroid	-	Yes	Promoter_anchored_loops:Fetal_Cortex:Left_Ventricle:Liver:GM12878:IMR90:Mesenchymal_Stem_Cell:Mesendoderm	1.86371e-35	rs9939450;rs2726039;rs2726034;rs8055138;rs151226;rs12448482;rs7500321;rs2726034:rs8055138:rs17708638:rs151226:rs2726039:rs2726034	197;198
ENSG00000178188	SH2B1	16	28857921	28885526	0.95683	-1.07205	72	22.5	395	1.29141e-21	0	eQTLcatalogue/TwinsUK_ge_fat:eQTLGen_cis_eQTLs:CMC_SVA_cis:GTEx/v8/Adipose_Subcutaneous:GTEx/v8/Adipose_Visceral_Omentum:GTEx/v8/Adrenal_Gland:GTEx/v8/Whole_Blood:GTEx/v8/Artery_Aorta:GTEx/v8/Artery_Tibial:GTEx/v8/Brain_Cerebellar_Hemisphere:GTEx/v8/Brain_Cerebellum:GTEx/v8/Breast_Mammary_Tissue:GTEx/v8/Colon_Sigmoid:GTEx/v8/Esophagus_Gastroesophageal_Junction:GTEx/v8/Esophagus_Mucosa:GTEx/v8/Eso…	-	No	NA	1.86371e-35	rs8055138;rs12448482;rs7500321;rs2726034;rs151226;rs9939450;rs2726039	197
ENSG00000169682	SPNS1	16	28985542	28995869	NA	-0.263577	17	13.34	488	3.27170000000001e-310	0	eQTLcatalogue/BLUEPRINT_ge_T-cell:eQTLcatalogue/CEDAR_B-cell_CD19:eQTLcatalogue/CEDAR_monocyte_CD14:eQTLcatalogue/CEDAR_platelet:eQTLcatalogue/CEDAR_T-cell_CD4:eQTLcatalogue/CEDAR_T-cell_CD8:eQTLcatalogue/Fairfax_2012_B-cell_CD19:eQTLcatalogue/Fairfax_2014_IFN24:eQTLcatalogue/Fairfax_2014_LPS24:eQTLcatalogue/Fairfax_2014_LPS2:eQTLcatalogue/Fairfax_2014_naive:eQTLcatalogue/Kasela_2017_T-cell_CD8:e…	-	Yes	Promoter_anchored_loops:Adult_Cortex:Fetal_Cortex:Left_Ventricle:GM12878:IMR90:Mesenchymal_Stem_Cell:Mesendoderm	1.86371e-35	rs7500321;rs12448482;rs8055138;rs2726034;rs151226;rs9939450;rs2726039;rs4787480;rs4787480:rs8055138:rs12448482:rs3814883;rs4787491:rs4787491:rs3814883:rs7186852:rs8063565:rs8055138;rs7500321:rs8063565;rs7186852:rs8047664	197;198
ENSG00000196502	SULT1A1	16	28616903	28634946	2.23676e-09	NA	75	10.15	478	0	0	eQTLcatalogue/Alasoo_2018_ge_macrophage_naive:eQTLcatalogue/BrainSeq_ge_brain:eQTLcatalogue/CEDAR_ileum:eQTLcatalogue/CEDAR_monocyte_CD14:eQTLcatalogue/CEDAR_neutrophil_CD15:eQTLcatalogue/CEDAR_rectum:eQTLcatalogue/CEDAR_T-cell_CD4:eQTLcatalogue/CEDAR_T-cell_CD8:eQTLcatalogue/CEDAR_transverse_colon:eQTLcatalogue/Fairfax_2014_IFN24:eQTLcatalogue/Fairfax_2014_LPS24:eQTLcatalogue/Fairfax_2014_naive:…	-	Yes	Promoter_anchored_loops:IMR90:Mesenchymal_Stem_Cell	1.86371e-35	rs8055138;rs151226;rs2726034;rs12448482;rs7500321;rs2726039;rs9939450;rs8055138:rs9939450	197
ENSG00000197165	SULT1A2	16	28603264	28608430	1.83502e-08	1.08454	58	25	478	3.27170000000001e-310	0	eQTLcatalogue/Alasoo_2018_ge_macrophage_IFNg:eQTLcatalogue/Alasoo_2018_ge_macrophage_naive:eQTLcatalogue/BLUEPRINT_ge_monocyte:eQTLcatalogue/BLUEPRINT_ge_neutrophil:eQTLcatalogue/BLUEPRINT_ge_T-cell:eQTLcatalogue/BrainSeq_ge_brain:eQTLcatalogue/CEDAR_transverse_colon:eQTLcatalogue/GENCORD_ge_T-cell:eQTLcatalogue/Lepik_2017_ge_blood:eQTLcatalogue/Nedelec_2016_ge_macrophage_Listeria:eQTLcatalogue/N…	+	No	NA	1.86371e-35	rs8055138;rs151226;rs2726034;rs12448482;rs9939450;rs2726039;rs7500321	197
ENSG00000178952	TUFM	16	28853732	28857729	0.651456	-0.298214	40	10.05	509	3.27167000000001e-310	0	eQTLcatalogue/Alasoo_2018_ge_macrophage_IFNg_Salmonella:eQTLcatalogue/Alasoo_2018_ge_macrophage_IFNg:eQTLcatalogue/Alasoo_2018_ge_macrophage_naive:eQTLcatalogue/Alasoo_2018_ge_macrophage_Salmonella:eQTLcatalogue/BLUEPRINT_ge_monocyte:eQTLcatalogue/BLUEPRINT_ge_neutrophil:eQTLcatalogue/BLUEPRINT_ge_T-cell:eQTLcatalogue/BrainSeq_ge_brain:eQTLcatalogue/CEDAR_B-cell_CD19:eQTLcatalogue/CEDAR_monocyte_…	+	No	NA	1.86371e-35	rs12448482;rs8055138;rs2726034;rs7500321;rs151226;rs2726039;rs9939450;rs4787480	197;198
ENSG00000169180	XPO6	16	28109300	28223241	0.999999	NA	0	0	327	6.0683e-14	0	eQTLcatalogue/TwinsUK_ge_skin:eQTLGen_cis_eQTLs:GTEx/v8/Esophagus_Gastroesophageal_Junction:GTEx/v8/Heart_Left_Ventricle:GTEx/v8/Skin_Not_Sun_Exposed_Suprapubic:GTEx/v8/Skin_Sun_Exposed_Lower_leg	-	Yes	Promoter_anchored_loops:Adult_Cortex:Fetal_Cortex:GM12878	1.86371e-35	rs151226;rs2726034;rs8055138;rs12448482;rs7500321;rs8055138:rs151226:rs3814883:rs9939450	197;198
ENSG00000147443	DOK2	8	21766384	21771371	2.33627e-06	0.269056	0	0	0	NA	NA	NA	NA	Yes	Left_Ventricle:IMR90:Mesenchymal_Stem_Cell:Mesendoderm:Trophoblast-like_Cell:hESC	7.32594e-35	rs10749625:rs11204072:rs9644568;rs10096633:rs3289:rs6999158:rs9644568:rs6586872	121
ENSG00000003987	MTMR7	8	17155539	17271037	1.63744e-09	0.900646	0	0	0	NA	NA	NA	NA	Yes	IMR90:Mesenchymal_Stem_Cell	7.32594e-35	rs6586872:rs9644568;rs10096633:rs3289:rs6999158:rs9644568	121
ENSG00000156006	NAT2	8	18248755	18258728	0.0226079	0.267315	0	0	0	NA	NA	NA	NA	Yes	Left_Ventricle:IMR90:Mesenchymal_Stem_Cell	7.32594e-35	rs11204072:rs6586891:rs9644568:rs13263508:rs13273470:rs6586872:rs12543154:rs7016529:rs3898938:rs9644568;rs10096633:rs3289:rs6999158	121
ENSG00000130227	XPO7	8	21777180	21864096	0.999999	-0.565357	0	0	0	NA	NA	NA	NA	Yes	Left_Ventricle:IMR90:Mesenchymal_Stem_Cell:Mesendoderm:Trophoblast-like_Cell:hESC	7.32594e-35	rs10749625:rs11204072:rs9644568;rs10096633:rs3289:rs6999158:rs9644568:rs6586872	121
ENSG00000140287	HDC	15	50534144	50558223	0.514823	-0.20223	0	0	16	5.4489e-10	2.0816e-05	eQTLGen_trans_eQTLs	-	No	NA	1.94349e-34	rs442177;rs13244268;rs9644568;rs10096633;rs11826999;rs2000571	71;110;121;155
ENSG00000125462	C1orf61	1	156374042	156400493	0.104422	-0.188055	0	0	13	3.6893e-12	0	eQTLGen_trans_eQTLs	-	No	NA	2.38989e-34	rs2726034;rs8055138;rs151226;rs7500321	197
ENSG00000117228	GBP1	1	89518002	89531043	1.80843e-12	0.869246	0	0	13	5.0849e-19	0	eQTLGen_trans_eQTLs	-	No	NA	2.38989e-34	rs2726034;rs8055138;rs151226;rs7500321	197
ENSG00000162645	GBP2	1	89571815	89616139	1.96949e-05	-0.409539	0	0	12	7.7221e-13	0	eQTLGen_trans_eQTLs	-	No	NA	2.38989e-34	rs8055138;rs151226;rs7500321	197
ENSG00000185499	MUC1	1	155158300	155162707	0.730965	NA	0	0	11	8.9349e-09	0.000164582	eQTLGen_trans_eQTLs	-	No	NA	2.38989e-34	rs8055138;rs151226;rs7500321	197
ENSG00000090104	RGS1	1	192544857	192549161	0.635711	0.470714	0	0	13	2.2219e-12	0	eQTLGen_trans_eQTLs	-	No	NA	2.38989e-34	rs2726034;rs8055138;rs151226;rs7500321	197
ENSG00000179921	GPBAR1	2	219124219	219128582	1.86484e-06	0.343288	0	0	7	7.0276e-07	0.00606462	eQTLGen_trans_eQTLs	-	No	NA	2.38989e-34	rs8055138	197
ENSG00000115415	STAT1	2	191829084	191885686	0.999994	-0.650494	0	0	13	6.361e-40	0	eQTLGen_trans_eQTLs	-	No	NA	2.38989e-34	rs2726034;rs8055138;rs151226;rs7500321	197
ENSG00000183891	TTC32	2	20096404	20101747	0.0898979	0.0906132	0	0	7	1.0331e-07	0.00118878	eQTLGen_trans_eQTLs	-	No	NA	2.38989e-34	rs8055138	197
ENSG00000168899	VAMP5	2	85811531	85820535	0.0516197	0.554615	0	0	12	2.9159e-14	0	eQTLGen_trans_eQTLs	-	No	NA	2.38989e-34	rs2726034;rs8055138;rs151226;rs7500321	197
ENSG00000041880	PARP3	3	51976361	51982883	1.48672e-08	-0.37974	0	0	10	1.1785e-07	0.00130877	eQTLGen_trans_eQTLs	-	No	NA	2.38989e-34	rs8055138;rs151226;rs7500321;rs7184567	197;198
ENSG00000164136	IL15	4	142557752	142655140	0.917198	-0.20143	0	0	12	1.313e-09	5.73066e-05	eQTLGen_trans_eQTLs	-	Yes	IMR90	2.38989e-34	rs8055138;rs151226;rs7500321;rs7668263	76;197
ENSG00000002549	LAP3	4	17578815	17609595	0.00122013	NA	0	0	12	1.3416e-14	0	eQTLGen_trans_eQTLs	-	No	NA	2.38989e-34	rs8055138;rs151226;rs7500321	197
ENSG00000111801	BTN3A3	6	26440700	26453643	7.19025e-10	1.09011	0	0	138	2.00925e-44	0	eQTLcatalogue/CEDAR_neutrophil_CD15:eQTLcatalogue/CEDAR_T-cell_CD4:eQTLcatalogue/CEDAR_T-cell_CD8:eQTLcatalogue/Fairfax_2012_B-cell_CD19:eQTLcatalogue/Fairfax_2014_IFN24:eQTLcatalogue/Fairfax_2014_naive:PsychENCODE_eQTLs:eQTLGen_cis_eQTLs:eQTLGen_trans_eQTLs:GTEx/v8/Esophagus_Muscularis:GTEx/v8/Skin_Sun_Exposed_Lower_leg	-	Yes	Liver:GM12878:IMR90:Mesenchymal_Stem_Cell:Mesendoderm:Trophoblast-like_Cell:hESC	2.38989e-34	rs2893843;rs4145878;rs6916289;rs707896;rs2066295;rs1009181;rs9379831;rs806794;rs8055138;rs151226;rs7500321;rs6916289:rs806794:rs2893843	88;197
ENSG00000096968	JAK2	9	4985033	5128183	0.969035	-1.00501	0	0	12	7.6223e-10	2.02716e-05	eQTLGen_trans_eQTLs	-	No	NA	2.38989e-34	rs8055138;rs151226;rs7500321	197
ENSG00000156510	HKDC1	10	70980059	71027315	1.84795e-12	0.104024	0	0	6	1.9417e-06	0.0148695	eQTLGen_trans_eQTLs	-	No	NA	2.38989e-34	rs8055138;rs7500321	197
ENSG00000134470	IL15RA	10	5990855	6020150	3.17111e-08	0.112618	0	0	11	6.7517e-10	2.04374e-05	eQTLGen_trans_eQTLs	-	No	NA	2.38989e-34	rs8055138;rs151226;rs7500321	197
ENSG00000133321	RARRES3	11	63304281	63313934	0.000504117	-0.0612309	0	0	12	1.6916e-12	0	eQTLGen_trans_eQTLs	-	No	NA	2.38989e-34	rs2726034;rs8055138;rs151226;rs7500321	197
ENSG00000166002	SMCO4	11	93211638	93276674	0.00205705	-0.356948	0	0	9	2.3859e-08	0.000316313	eQTLGen_trans_eQTLs	-	No	NA	2.38989e-34	rs8055138;rs151226	197
ENSG00000156587	UBE2L6	11	57319129	57335757	0.0140103	NA	0	0	12	1.19e-10	0	eQTLGen_trans_eQTLs	-	No	NA	2.38989e-34	rs8055138;rs151226;rs7500321	197
ENSG00000134897	BIVM	13	103451399	103493885	6.43353e-06	-0.588749	0	0	12	5.3527e-10	2.08377e-05	eQTLGen_trans_eQTLs	+	No	NA	2.38989e-34	rs8055138;rs151226;rs7500321	197
ENSG00000139597	N4BP2L1	13	32974861	33002315	0.945269	1.32574	0	0	10	2.2088e-08	0.00027281	eQTLGen_trans_eQTLs	-	No	NA	2.38989e-34	rs8055138;rs151226;rs7500321	197
ENSG00000131979	GCH1	14	55308726	55369570	0.942486	0.329841	0	0	10	2.7761e-08	0.000385299	eQTLGen_trans_eQTLs	-	No	NA	2.38989e-34	rs8055138;rs7500321	197
ENSG00000140105	WARS	14	100800125	100843142	0.994701	-0.614375	0	0	10	4.2437e-08	0.00059364	eQTLGen_trans_eQTLs	-	No	NA	2.38989e-34	rs8055138;rs151226	197
ENSG00000140511	HAPLN3	15	89420519	89438857	3.91722e-06	-0.101409	0	0	10	1.5639e-08	0.000188029	eQTLGen_trans_eQTLs	-	No	NA	2.38989e-34	rs8055138;rs151226	197
ENSG00000229474	PATL2	15	44957930	45003514	0.0677101	0.105561	0	0	11	9.8654e-11	0	eQTLGen_trans_eQTLs	-	No	NA	2.38989e-34	rs8055138;rs151226;rs7500321	197
ENSG00000205220	PSMB10	16	67968405	67970990	2.33998e-05	-0.21892	7	17.17	361	1.07184e-11	0	eQTLGen_cis_eQTLs:eQTLGen_trans_eQTLs:GTEx/v8/Adipose_Subcutaneous:GTEx/v8/Skin_Not_Sun_Exposed_Suprapubic:GTEx/v8/Skin_Sun_Exposed_Lower_leg:GTEx/v8/Testis	+	Yes	Promoter_anchored_loops:EP_correlation_cell_type_oneway:Adult_Cortex:Fetal_Cortex:IMR90:Mesenchymal_Stem_Cell	2.38989e-34	rs7198357;rs7201742;rs2726034;rs8055138;rs151226;rs7500321;rs2863973;rs7201742:rs7201742:rs7198357:rs2863973	197;201
ENSG00000108679	LGALS3BP	17	76967320	76976191	3.92643e-07	-0.0688765	0	0	12	1.4657e-15	0	eQTLGen_trans_eQTLs	-	No	NA	2.38989e-34	rs8055138;rs151226;rs7500321	197
ENSG00000128284	APOL3	22	36536372	36562225	2.87222e-05	-0.122283	0	0	13	1.7549e-26	0	eQTLGen_trans_eQTLs	-	No	NA	2.38989e-34	rs2726034;rs8055138;rs151226;rs7500321	197
ENSG00000149925	ALDOA	16	30064411	30081778	0.0248344	-1.30116	18	13.6	0	NA	NA	NA	NA	Yes	Promoter_anchored_loops:Adult_Cortex:Fetal_Cortex:Left_Ventricle:GM12878:IMR90	9.4982e-34	rs4787491;rs3814883;rs4787491:rs8055138:rs12448482:rs4787480:rs3814883:rs3814883;rs4787491:rs2887799:rs7186852:rs8063565:rs8063565;rs7186852:rs8047664:rs11864054:rs7184567;rs8063565;rs11150596:rs7184567;rs11150596:rs151226:rs11150604;rs11864054:rs11865499;rs8063565:rs7184567;rs11865499:rs11150604	197;198
ENSG00000174939	ASPHD1	16	29911696	29931185	0.120036	-0.52857	34	14.96	226	1.35641e-14	0	PsychENCODE_eQTLs:BIOSQTL/BIOS_eQTL_geneLevel:xQTLServer_eQTLs:GTEx/v8/Adipose_Subcutaneous:GTEx/v8/Adrenal_Gland:GTEx/v8/Brain_Cerebellum:GTEx/v8/Brain_Hypothalamus:GTEx/v8/Brain_Putamen_basal_ganglia:GTEx/v8/Brain_Substantia_nigra	-	Yes	EP_links_oneway:Promoter_anchored_loops:Adult_Cortex:Fetal_Cortex:IMR90:Mesenchymal_Stem_Cell:Mesendoderm:Trophoblast-like_Cell	9.4982e-34	rs12917712;rs4787491;rs3814883;rs2005219;rs7201780;rs2887799;rs4238961;rs4787480;rs4787491:rs3814883:rs8055138:rs4787480:rs4787491:rs12448482:rs7186852	197;198
ENSG00000196118	C16orf93	16	30768744	30774031	8.00214e-05	-0.754319	3	9.074	414	2.62432e-61	0	eQTLcatalogue/BLUEPRINT_ge_monocyte:eQTLcatalogue/BrainSeq_ge_brain:eQTLcatalogue/CEDAR_monocyte_CD14:eQTLcatalogue/Fairfax_2014_LPS24:eQTLcatalogue/Fairfax_2014_naive:eQTLcatalogue/Lepik_2017_ge_blood:eQTLcatalogue/TwinsUK_ge_skin:PsychENCODE_eQTLs:eQTLGen_cis_eQTLs:BIOSQTL/BIOS_eQTL_geneLevel:xQTLServer_eQTLs:CMC_SVA_cis:CMC_NoSVA_cis:GTEx/v8/Adipose_Subcutaneous:GTEx/v8/Adrenal_Gland:GTEx/v8/A…	-	Yes	Promoter_anchored_loops:Adult_Cortex:Fetal_Cortex:Aorta:Dorsolateral_Prefrontal_Cortex:Hippocampus:Left_Ventricle:Liver:Spleen:GM12878:IMR90:Mesenchymal_Stem_Cell:Mesendoderm:Neural_Progenitor_Cell:Trophoblast-like_Cell:hESC	9.4982e-34	rs8063565;rs7186852;rs11864054;rs11150596;rs11150604;rs7184567;rs11865499;rs2230433;rs2887799;rs7201780;rs4341759;rs1052352;rs4889649;rs17708638;rs4787480:rs8063565:rs11864054:rs7184567;rs11150596:rs3814883:rs7186852:rs7184567;rs11150596:rs11150604;rs11864054:rs11865499;rs8063565:rs7184567;rs11865499:rs11150604:rs8063565;rs7186852:rs8047664:rs11150596:rs8055138:rs12448482	197;198
ENSG00000177455	CD19	16	28943260	28950667	0.853622	-0.388221	13	10.87	3	0.000133727	0.0151628	GTEx/v8/Testis	NA	Yes	Promoter_anchored_loops:GM12878:IMR90:Mesenchymal_Stem_Cell	9.4982e-34	rs8055138;rs7500321;rs12448482;rs8055138:rs12448482:rs7500321	197
ENSG00000103502	CDIPT	16	29869678	29875057	0.193883	-0.675994	16	13.13	171	3.9281e-23	0	PsychENCODE_eQTLs:eQTLGen_cis_eQTLs:eQTLGen_trans_eQTLs:BIOSQTL/BIOS_eQTL_geneLevel:GTEx/v8/Whole_Blood:GTEx/v8/Artery_Tibial:GTEx/v8/Brain_Cerebellar_Hemisphere:GTEx/v8/Brain_Cerebellum:GTEx/v8/Esophagus_Mucosa:GTEx/v8/Skin_Not_Sun_Exposed_Suprapubic:GTEx/v8/Skin_Sun_Exposed_Lower_leg	+	Yes	Promoter_anchored_loops:Adult_Cortex:Fetal_Cortex:Left_Ventricle:Liver:GM12878:IMR90:Mesenchymal_Stem_Cell	9.4982e-34	rs4787480;rs12917712;rs3814883;rs4787491;rs3800227;rs2253310;rs11864054;rs3814883:rs3814883;rs4787491:rs4787480:rs4787491:rs8055138:rs7186852:rs8063565;rs7186852:rs8047664:rs8063565	97;197;198
ENSG00000149926	FAM57B	16	30035748	30064299	0.285736	NA	49	15.67	237	1.52446e-28	7.84412e-23	eQTLcatalogue/HipSci_ge_iPSC:PsychENCODE_eQTLs:DICE/T_CD8_naive:GTEx/v8/Adrenal_Gland:GTEx/v8/Breast_Mammary_Tissue:GTEx/v8/Esophagus_Muscularis:GTEx/v8/Muscle_Skeletal:GTEx/v8/Cells_Cultured_fibroblasts:GTEx/v8/Skin_Not_Sun_Exposed_Suprapubic:GTEx/v8/Skin_Sun_Exposed_Lower_leg:GTEx/v8/Stomach	-	Yes	Promoter_anchored_loops:Adult_Cortex:Fetal_Cortex:Left_Ventricle:GM12878:IMR90	9.4982e-34	rs3814883;rs4787491;rs11150582;rs2005219;rs2887799;rs4238961;rs7201780;rs7184567;rs11150596;rs11865499;rs8063565;rs4787491:rs8055138:rs12448482:rs4787480:rs3814883:rs3814883;rs4787491:rs2887799:rs7186852:rs8063565:rs8063565;rs7186852:rs8047664:rs11864054:rs7184567;rs11150596:rs7184567;rs11150596:rs151226:rs11150604;rs11864054:rs11865499;rs8063565:rs7184567;rs11865499:rs11150604	197;198
ENSG00000149929	HIRIP3	16	30003645	30007757	0.0190028	-1.20371	21	18.16	6	9.27225e-06	0.009671	eQTLcatalogue/TwinsUK_ge_fat:GTEx/v8/Breast_Mammary_Tissue:GTEx/v8/Prostate	NA	Yes	Promoter_anchored_loops:Adult_Cortex:Fetal_Cortex:GM12878:IMR90:Mesenchymal_Stem_Cell	9.4982e-34	rs3814883;rs4787491;rs7201780;rs2005219;rs4787480:rs4787491:rs8055138:rs12448482:rs3814883:rs3814883;rs4787491:rs7186852:rs151226	197;198
ENSG00000169592	INO80E	16	30006615	30017114	0.0174147	-1.07729	27	18.17	456	3.27170000000001e-310	0	eQTLcatalogue/BLUEPRINT_ge_monocyte:eQTLcatalogue/BLUEPRINT_ge_neutrophil:eQTLcatalogue/BLUEPRINT_ge_T-cell:eQTLcatalogue/BrainSeq_ge_brain:eQTLcatalogue/Fairfax_2012_B-cell_CD19:eQTLcatalogue/GENCORD_ge_fibroblast:eQTLcatalogue/GENCORD_ge_LCL:eQTLcatalogue/GENCORD_ge_T-cell:eQTLcatalogue/GEUVADIS_ge_LCL:eQTLcatalogue/Kasela_2017_T-cell_CD4:eQTLcatalogue/Kasela_2017_T-cell_CD8:eQTLcatalogue/Lepik…	-	Yes	Promoter_anchored_loops:Adult_Cortex:Fetal_Cortex:GM12878:IMR90:Mesenchymal_Stem_Cell	9.4982e-34	rs3814883;rs4787491;rs2005219;rs7201780;rs4238961;rs2887799;rs12917712;rs11150582;rs7186852;rs11864054;rs11150604;rs11150596;rs8063565;rs7184567;rs11865499;rs4787480;rs4341759;rs8047664;rs4787480:rs4787491:rs8055138:rs12448482:rs3814883:rs3814883;rs4787491:rs7186852:rs151226	197;198
ENSG00000079616	KIF22	16	29802040	29816706	4.39968e-06	-0.0873485	4	10.93	0	NA	NA	NA	NA	Yes	Promoter_anchored_loops:Adult_Cortex:Fetal_Cortex:GM12878:IMR90:Mesenchymal_Stem_Cell:Mesendoderm	9.4982e-34	rs4787480;rs8055138;rs7500321:rs8055138:rs4787480:rs3814883:rs3814883;rs4787491:rs12448482:rs4787491:rs7186852:rs7500321:rs8063565	197;198
ENSG00000103495	MAZ	16	29817427	29823649	0.95397	NA	13	10.93	0	NA	NA	NA	NA	Yes	EP_links_oneway:Promoter_anchored_loops:Adult_Cortex:Fetal_Cortex:GM12878:IMR90:Mesenchymal_Stem_Cell:Mesendoderm	9.4982e-34	rs4787480;rs3814883:rs3814883;rs4787491:rs8055138:rs8055138;rs7500321:rs4787491:rs2005219:rs151226:rs12448482:rs4787480:rs7186852:rs7184567;rs11150596:rs8063565:rs7184567;rs8063565;rs11150596:rs7184567;rs11865499:rs11150604:rs7500321	197;198
ENSG00000156873	PHKG2	16	30759591	30772490	0.0216345	-1.16374	4	9.074	241	7.33159e-18	0	eQTLcatalogue/BrainSeq_ge_brain:DICE/Monocyte_classical:eQTLGen_cis_eQTLs:BIOSQTL/BIOS_eQTL_geneLevel:GTEx/v8/Esophagus_Gastroesophageal_Junction:GTEx/v8/Esophagus_Muscularis:GTEx/v8/Thyroid	-	Yes	Promoter_anchored_loops:Adult_Cortex:Fetal_Cortex:Aorta:Dorsolateral_Prefrontal_Cortex:Hippocampus:Left_Ventricle:Liver:Spleen:GM12878:IMR90:Mesenchymal_Stem_Cell:Mesendoderm:Neural_Progenitor_Cell:Trophoblast-like_Cell:hESC	9.4982e-34	rs8063565;rs7186852;rs11150596;rs7184567;rs12917712;rs4341759;rs11864054;rs11150604;rs2887799;rs11865499;rs8063565:rs7186852:rs7184567;rs11150596:rs7184567;rs11150596:rs3814883:rs11150604;rs11864054:rs11865499;rs8063565:rs8063565;rs7186852:rs8047664:rs11864054:rs11150596:rs8055138:rs12448482	197;198
ENSG00000103549	RNF40	16	30773066	30787628	0.999995	-1.91378	6	9.074	247	6.7566e-89	0	eQTLcatalogue/BLUEPRINT_ge_monocyte:eQTLcatalogue/BLUEPRINT_ge_neutrophil:eQTLcatalogue/BLUEPRINT_ge_T-cell:eQTLcatalogue/CEDAR_neutrophil_CD15:eQTLcatalogue/Fairfax_2014_LPS24:eQTLcatalogue/Fairfax_2014_naive:eQTLcatalogue/Kasela_2017_T-cell_CD4:eQTLcatalogue/Lepik_2017_ge_blood:eQTLcatalogue/Quach_2016_ge_monocyte_IAV:eQTLcatalogue/TwinsUK_ge_fat:eQTLcatalogue/TwinsUK_ge_LCL:PsychENCODE_eQTLs:e…	+	Yes	Promoter_anchored_loops:Adult_Cortex:Fetal_Cortex:Aorta:Dorsolateral_Prefrontal_Cortex:Hippocampus:Left_Ventricle:Liver:Spleen:GM12878:IMR90:Mesenchymal_Stem_Cell:Mesendoderm:Neural_Progenitor_Cell:Trophoblast-like_Cell:hESC	9.4982e-34	rs8063565;rs7186852;rs11150596;rs11865499;rs11150604;rs11864054;rs7184567;rs4341759;rs2230433;rs8047664;rs4787480:rs8063565:rs11864054:rs7184567;rs11150596:rs3814883:rs7186852:rs7184567;rs11150596:rs11150604;rs11864054:rs11865499;rs8063565:rs7184567;rs11865499:rs11150604:rs8063565;rs7186852:rs8047664:rs11150596:rs8055138:rs12448482	197;198
ENSG00000174938	SEZ6L2	16	29882480	29910868	0.130153	0.0113468	30	14.96	161	4.34649e-14	2.70527e-10	eQTLcatalogue/GENCORD_ge_T-cell:eQTLcatalogue/Nedelec_2016_ge_macrophage_Salmonella:eQTLcatalogue/TwinsUK_ge_fat:PsychENCODE_eQTLs:xQTLServer_eQTLs:GTEx/v8/Adipose_Subcutaneous:GTEx/v8/Adipose_Visceral_Omentum:GTEx/v8/Adrenal_Gland:GTEx/v8/Brain_Cerebellar_Hemisphere:GTEx/v8/Brain_Cerebellum:GTEx/v8/Esophagus_Muscularis:GTEx/v8/Heart_Atrial_Appendage:GTEx/v8/Heart_Left_Ventricle:GTEx/v8/Muscle_Sk…	+	Yes	EP_links_oneway:Promoter_anchored_loops:Adult_Cortex:Fetal_Cortex:IMR90:Mesenchymal_Stem_Cell:Mesendoderm:Trophoblast-like_Cell	9.4982e-34	rs12917712;rs4787480;rs4787491;rs3814883;rs2005219;rs7201780;rs2887799;rs4787491:rs3814883:rs8055138:rs4787480:rs4787491:rs12448482:rs7186852	197;198
ENSG00000149930	TAOK2	16	29984962	30003582	0.998764	-1.19163	35	18.16	61	2.3482e-07	0.000334627	PsychENCODE_eQTLs:GTEx/v8/Adrenal_Gland:GTEx/v8/Skin_Not_Sun_Exposed_Suprapubic	-	Yes	Promoter_anchored_loops:Adult_Cortex:Fetal_Cortex:Left_Ventricle:Liver:GM12878:IMR90:Mesenchymal_Stem_Cell:Mesendoderm:Trophoblast-like_Cell:hESC	9.4982e-34	rs3814883;rs4787491;rs2005219;rs7201780;rs4787480:rs8055138:rs12448482:rs4787491:rs3814883;rs4787491:rs3814883:rs7186852:rs8063565:rs8063565;rs7186852:rs8047664	197;198
ENSG00000102870	ZNF629	16	30789778	30798523	0.992318	-1.86757	9	8.574	0	NA	NA	NA	NA	Yes	Adult_Cortex:Fetal_Cortex:Aorta:Dorsolateral_Prefrontal_Cortex:Hippocampus:Left_Ventricle:Liver:Spleen:GM12878:IMR90:Mesenchymal_Stem_Cell:Mesendoderm:Neural_Progenitor_Cell:Trophoblast-like_Cell:hESC	9.4982e-34	rs8063565;rs11150596;rs3814883:rs7186852:rs8063565:rs11864054:rs7184567;rs11150596:rs7184567;rs11150596:rs11150604;rs11864054:rs11865499;rs8063565:rs8063565;rs7186852:rs8047664:rs11150596:rs8055138:rs12448482	197;198
ENSG00000261832	CLN3	16	28477974	28503333	NA	NA	29	16.07	258	8.01819e-65	0	PsychENCODE_eQTLs:BIOSQTL/BIOS_eQTL_geneLevel	-	No	NA	1.12011e-33	rs8055138;rs151226;rs2726034;rs12448482;rs7500321	197
ENSG00000185928	PAGR1	16	29827285	29841948	NA	-0.375105	32	10.93	37	1.6427e-07	0.000550275	eQTLGen_cis_eQTLs	-	Yes	Promoter_anchored_loops:GM12878:IMR90:Mesenchymal_Stem_Cell:Mesendoderm	1.37269e-33	rs4787480;rs12917712;rs8055138:rs8055138;rs7500321:rs3814883:rs3814883;rs4787491:rs4787491:rs2005219:rs4787480:rs12448482:rs7500321:rs7186852:rs8063565	197;198
ENSG00000263136	PAGR1	16	29827832	29831438	0.500966	-0.375105	20	10.93	0	NA	NA	NA	NA	Yes	Promoter_anchored_loops:GM12878:IMR90:Mesenchymal_Stem_Cell:Mesendoderm	1.37269e-33	rs4787480;rs8055138:rs8055138;rs7500321:rs3814883:rs3814883;rs4787491:rs4787491:rs2005219:rs4787480:rs12448482:rs7500321:rs7186852:rs8063565	197;198
ENSG00000167371	PRRT2	16	29823177	29827201	0.301736	NA	18	10.93	90	3.53006e-10	2.46718e-56	GTEx/v8/Brain_Cerebellar_Hemisphere:GTEx/v8/Brain_Cerebellum:GTEx/v8/Breast_Mammary_Tissue:GTEx/v8/Nerve_Tibial:GTEx/v8/Cells_Cultured_fibroblasts:GTEx/v8/Skin_Not_Sun_Exposed_Suprapubic	-	Yes	Promoter_anchored_loops:GM12878:IMR90:Mesenchymal_Stem_Cell:Mesendoderm	1.37269e-33	rs4787480;rs12917712;rs3814883;rs7201780;rs2005219;rs2887799;rs8055138:rs8055138;rs7500321:rs3814883:rs3814883;rs4787491:rs4787491:rs2005219:rs4787480:rs12448482:rs7500321:rs7186852:rs8063565	197;198
ENSG00000146425	DYNLT1	6	159057506	159065771	0.039211	-0.150035	0	0	2	1.349e-06	0.0106472	eQTLGen_trans_eQTLs	-	No	NA	2.36124e-33	rs8055138	197
ENSG00000100473	COCH	14	31343720	31364271	0.000262849	-0.0296523	0	0	5	3.2731e-07	0.00298307	eQTLGen_trans_eQTLs	+	No	NA	3.32613e-33	rs8055138;rs151226	197
ENSG00000131016	AKAP12	6	151561134	151679692	0.372502	0.743186	0	0	6	7.6379e-07	0.00648985	eQTLGen_trans_eQTLs	-	No	NA	1.08072e-32	rs9644568;rs10096633	121
ENSG00000183336	BOLA2	16	29464914	29466285	NA	-0.742931	0	0	226	7.56363e-45	6.80217e-38	eQTLcatalogue/Fairfax_2014_naive:GTEx/v8/Adipose_Subcutaneous:GTEx/v8/Adipose_Visceral_Omentum:GTEx/v8/Adrenal_Gland:GTEx/v8/Cells_EBV-transformed_lymphocytes:GTEx/v8/Whole_Blood:GTEx/v8/Artery_Aorta:GTEx/v8/Artery_Coronary:GTEx/v8/Artery_Tibial:GTEx/v8/Brain_Amygdala:GTEx/v8/Brain_Anterior_cingulate_cortex_BA24:GTEx/v8/Brain_Caudate_basal_ganglia:GTEx/v8/Brain_Cerebellar_Hemisphere:GTEx/v8/Brain…	-	No	NA	7.26009e-31	rs12917712;rs7201780;rs2887799;rs4238961;rs3814883;rs2005219;rs4787491;rs11150582	198
ENSG00000102879	CORO1A	16	30194148	30200397	0.954491	NA	6	10.71	261	5.6623e-77	0	eQTLcatalogue/Fairfax_2014_IFN24:eQTLGen_cis_eQTLs:BIOSQTL/BIOS_eQTL_geneLevel:CMC_SVA_cis:GTEx/v8/Adipose_Subcutaneous:GTEx/v8/Adipose_Visceral_Omentum:GTEx/v8/Nerve_Tibial:GTEx/v8/Skin_Not_Sun_Exposed_Suprapubic:GTEx/v8/Skin_Sun_Exposed_Lower_leg:GTEx/v8/Thyroid	-	Yes	Promoter_anchored_loops	7.26009e-31	rs2887799;rs2005219;rs4238961;rs4787480;rs4787491;rs3814883;rs7201780;rs4341759;rs7186852;rs4787491:rs2005219:rs2887799:rs2005219	198
ENSG00000179958	DCTPP1	16	30434940	30441396	0.184698	-0.825962	2	1.098	216	2.336e-12	0	eQTLGen_cis_eQTLs	-	Yes	Promoter_anchored_loops:Left_Ventricle:Liver:GM12878:IMR90:Mesenchymal_Stem_Cell:Mesendoderm:Trophoblast-like_Cell:hESC	7.26009e-31	rs4238961;rs4787491;rs3814883;rs2005219;rs7201780;rs2887799;rs4787491:rs3814883:rs7186852:rs8063565:rs8063565;rs7186852:rs8047664	198
ENSG00000149927	DOC2A	16	30016830	30034591	0.0185536	NA	43	18.17	279	3.97658e-59	0	eQTLcatalogue/HipSci_ge_iPSC:PsychENCODE_eQTLs:BIOSQTL/BIOS_eQTL_geneLevel:CMC_SVA_cis:GTEx/v8/Adipose_Subcutaneous:GTEx/v8/Adipose_Visceral_Omentum:GTEx/v8/Adrenal_Gland:GTEx/v8/Artery_Aorta:GTEx/v8/Artery_Tibial:GTEx/v8/Colon_Transverse:GTEx/v8/Esophagus_Gastroesophageal_Junction:GTEx/v8/Esophagus_Mucosa:GTEx/v8/Esophagus_Muscularis:GTEx/v8/Heart_Atrial_Appendage:GTEx/v8/Heart_Left_Ventricle:GT…	-	Yes	Promoter_anchored_loops:GM12878:IMR90:Mesenchymal_Stem_Cell	7.26009e-31	rs3814883;rs4787491;rs11150582;rs2005219;rs7201780;rs4787480;rs12917712;rs2887799;rs4238961;rs4787480:rs3814883;rs4787491:rs11864054:rs11150596:rs8063565;rs11150596:rs7184567;rs11150596:rs11150604:rs4787491:rs3814883	198
ENSG00000102886	GDPD3	16	30116131	30125177	1.05165e-07	-0.375161	13	15.65	296	5.94373e-122	0	eQTLcatalogue/BLUEPRINT_ge_monocyte:eQTLcatalogue/BLUEPRINT_ge_neutrophil:eQTLcatalogue/BLUEPRINT_ge_T-cell:eQTLcatalogue/CEDAR_neutrophil_CD15:eQTLcatalogue/Fairfax_2012_B-cell_CD19:eQTLcatalogue/Fairfax_2014_naive:eQTLcatalogue/GENCORD_ge_LCL:eQTLcatalogue/GEUVADIS_ge_LCL:eQTLcatalogue/HipSci_ge_iPSC:eQTLcatalogue/Kasela_2017_T-cell_CD4:eQTLcatalogue/Kasela_2017_T-cell_CD8:eQTLcatalogue/Lepik_2…	-	No	NA	7.26009e-31	rs4787491;rs3814883;rs2005219;rs7201780;rs11150582;rs2887799;rs4238961;rs4787480;rs4341759;rs12917712;rs8063565	198
ENSG00000174943	KCTD13	16	29916333	29938356	0.791961	-0.595148	38	14.96	254	8.37e-31	0	PsychENCODE_eQTLs:eQTLGen_cis_eQTLs:BIOSQTL/BIOS_eQTL_geneLevel:GTEx/v8/Adipose_Subcutaneous:GTEx/v8/Adipose_Visceral_Omentum:GTEx/v8/Adrenal_Gland:GTEx/v8/Artery_Aorta:GTEx/v8/Artery_Tibial:GTEx/v8/Colon_Sigmoid:GTEx/v8/Esophagus_Mucosa:GTEx/v8/Esophagus_Muscularis:GTEx/v8/Lung:GTEx/v8/Muscle_Skeletal:GTEx/v8/Cells_Cultured_fibroblasts:GTEx/v8/Skin_Not_Sun_Exposed_Suprapubic:GTEx/v8/Skin_Sun_Exp…	+	Yes	Promoter_anchored_loops:IMR90:Mesenchymal_Stem_Cell:Mesendoderm:Trophoblast-like_Cell:hESC	7.26009e-31	rs12917712;rs4787491;rs3814883;rs2005219;rs4787480;rs7201780;rs2887799;rs4238961;rs4787480:rs3814883;rs4787491:rs3814883:rs4787491:rs7186852:rs8063565	198
ENSG00000102882	MAPK3	16	30125426	30134827	0.409692	NA	19	13.16	601	3.27170000000001e-310	0	eQTLcatalogue/BLUEPRINT_ge_monocyte:eQTLcatalogue/BLUEPRINT_ge_neutrophil:eQTLcatalogue/BrainSeq_ge_brain:eQTLcatalogue/CEDAR_B-cell_CD19:eQTLcatalogue/CEDAR_monocyte_CD14:eQTLcatalogue/CEDAR_neutrophil_CD15:eQTLcatalogue/CEDAR_platelet:eQTLcatalogue/CEDAR_T-cell_CD8:eQTLcatalogue/Fairfax_2012_B-cell_CD19:eQTLcatalogue/Fairfax_2014_IFN24:eQTLcatalogue/Fairfax_2014_LPS24:eQTLcatalogue/Fairfax_2014…	+	Yes	Promoter_anchored_loops:Adult_Cortex:Fetal_Cortex	7.26009e-31	rs3814883;rs4787491;rs2005219;rs7201780;rs11150582;rs4238961;rs2887799;rs12917712;rs7186852;rs4341759;rs4787480;rs2230433;rs8063565;rs8047664;rs11150596;rs11864054;rs11150604;rs7184567;rs11865499;rs4787491:rs3814883:rs2005219:rs3814883;rs4787491:rs7186852	198
ENSG00000013364	MVP	16	29831715	29859355	0.00744852	0.176123	43	10.93	265	1.2436e-121	0	eQTLcatalogue/CEDAR_T-cell_CD8:eQTLcatalogue/Fairfax_2014_IFN24:eQTLcatalogue/Fairfax_2014_LPS24:eQTLcatalogue/Fairfax_2014_LPS2:eQTLcatalogue/GEUVADIS_ge_LCL:eQTLcatalogue/Naranbhai_2015_neutrophil_CD16:eQTLcatalogue/Nedelec_2016_ge_macrophage_Listeria:eQTLcatalogue/Nedelec_2016_ge_macrophage_naive:eQTLcatalogue/Nedelec_2016_ge_macrophage_Salmonella:eQTLGen_cis_eQTLs:BIOSQTL/BIOS_eQTL_geneLevel:…	+	Yes	Adult_Cortex:Fetal_Cortex:GM12878:IMR90:Mesenchymal_Stem_Cell:Mesendoderm	7.26009e-31	rs4787480;rs12917712;rs4787491;rs3814883;rs2005219;rs7201780;rs2887799;rs7186852;rs11150582;rs4787491:rs3814883:rs3814883;rs4787491:rs7186852:rs4787480:rs12448482:rs7500321:rs8063565	197;198
ENSG00000149923	PPP4C	16	30087299	30096698	0.759586	-0.372627	14	21.7	332	0	0	eQTLcatalogue/Fairfax_2014_naive:PsychENCODE_eQTLs:eQTLGen_cis_eQTLs:BIOSQTL/BIOS_eQTL_geneLevel:xQTLServer_eQTLs:GTEx/v8/Adipose_Subcutaneous:GTEx/v8/Adipose_Visceral_Omentum:GTEx/v8/Nerve_Tibial:GTEx/v8/Cells_Cultured_fibroblasts:GTEx/v8/Skin_Not_Sun_Exposed_Suprapubic	-	Yes	Adult_Cortex:Fetal_Cortex:GM12878:IMR90:Mesenchymal_Stem_Cell	7.26009e-31	rs4787491;rs3814883;rs2005219;rs12917712;rs11150582;rs4238961;rs4787480;rs7201780;rs2887799;rs8063565;rs7186852;rs11150596;rs11865499;rs4787480:rs3814883;rs4787491:rs3814883:rs7186852:rs8063565:rs8063565;rs7186852:rs8047664	198
ENSG00000169203	RP11-231C14.4	16	29495010	29517320	NA	NA	0	0	367	1.9671e-103	0	eQTLcatalogue/BLUEPRINT_ge_monocyte:eQTLcatalogue/BLUEPRINT_ge_neutrophil:eQTLcatalogue/BLUEPRINT_ge_T-cell:eQTLcatalogue/BrainSeq_ge_brain:eQTLcatalogue/CEDAR_neutrophil_CD15:eQTLcatalogue/Fairfax_2012_B-cell_CD19:eQTLcatalogue/Fairfax_2014_naive:eQTLcatalogue/GEUVADIS_ge_LCL:eQTLcatalogue/Quach_2016_ge_monocyte_naive:eQTLcatalogue/TwinsUK_ge_fat:eQTLcatalogue/TwinsUK_ge_LCL:eQTLcatalogue/van_de…	+	No	NA	7.26009e-31	rs3814883;rs4787491;rs2005219;rs7201780;rs2887799;rs4238961;rs11150582;rs4341759;rs4787480;rs12917712;rs8055138;rs151226	197;198
ENSG00000181625	SLX1B	16	29465822	29469540	0.516792	NA	0	0	183	7.0268e-24	4.24816e-16	eQTLcatalogue/Fairfax_2014_naive:eQTLcatalogue/GENCORD_ge_T-cell:PsychENCODE_eQTLs:DICE/T_CD8_naive:xQTLServer_eQTLs:GTEx/v8/Adrenal_Gland:GTEx/v8/Whole_Blood:GTEx/v8/Brain_Cerebellum:GTEx/v8/Brain_Cortex:GTEx/v8/Breast_Mammary_Tissue:GTEx/v8/Colon_Transverse:GTEx/v8/Lung:GTEx/v8/Pituitary:GTEx/v8/Prostate:GTEx/v8/Spleen:GTEx/v8/Thyroid	+	No	NA	7.26009e-31	rs12917712;rs3814883;rs4787491;rs7201780;rs2005219;rs2887799;rs4238961	198
ENSG00000197471	SPN	16	29674300	29682187	0.0912714	-0.605206	0	0	31	0.000249165	0.04785	BRAINEAC/OCTX	NA	Yes	Promoter_anchored_loops	7.26009e-31	rs3814883;rs4787491;rs3814883:rs4787491:rs2005219	198
ENSG00000149922	TBX6	16	30097114	30103208	0.0291475	-0.69371	14	21.7	319	4.41612e-103	0	eQTLcatalogue/BLUEPRINT_ge_monocyte:eQTLcatalogue/BrainSeq_ge_brain:eQTLcatalogue/GENCORD_ge_T-cell:eQTLcatalogue/GEUVADIS_ge_LCL:eQTLcatalogue/Lepik_2017_ge_blood:eQTLcatalogue/TwinsUK_ge_blood:eQTLcatalogue/TwinsUK_ge_fat:eQTLcatalogue/TwinsUK_ge_LCL:eQTLcatalogue/TwinsUK_ge_skin:PsychENCODE_eQTLs:eQTLGen_cis_eQTLs:BIOSQTL/BIOS_eQTL_geneLevel:GTEx/v8/Adipose_Subcutaneous:GTEx/v8/Adipose_Viscera…	+	Yes	Promoter_anchored_loops:GM12878:IMR90:Mesenchymal_Stem_Cell	7.26009e-31	rs4787491;rs3814883;rs2005219;rs4238961;rs7201780;rs2887799;rs12917712;rs7186852;rs11150582;rs4787480;rs4787480:rs7201780:rs7186852:rs8063565:rs8063565;rs7186852:rs8047664	198
ENSG00000149932	TMEM219	16	29952206	29984373	0.00103536	-0.146993	48	18	199	4.09826e-08	2.59946e-05	eQTLcatalogue/Alasoo_2018_ge_macrophage_naive:eQTLcatalogue/Quach_2016_ge_monocyte_IAV:eQTLcatalogue/TwinsUK_ge_LCL:PsychENCODE_eQTLs:DICE/Monocyte_classical:CMC_SVA_cis:GTEx/v8/Adipose_Subcutaneous:GTEx/v8/Artery_Tibial:GTEx/v8/Brain_Cortex:GTEx/v8/Brain_Nucleus_accumbens_basal_ganglia:GTEx/v8/Lung:GTEx/v8/Pituitary:GTEx/v8/Cells_Cultured_fibroblasts:GTEx/v8/Thyroid	-	No	NA	7.26009e-31	rs3814883;rs4787491;rs8063565;rs11150596;rs2005219;rs4238961;rs7201780;rs2887799;rs4787480	198
ENSG00000090238	YPEL3	16	30103635	30108236	0.122709	NA	12	21.7	418	1.9221e-218	0	eQTLcatalogue/BLUEPRINT_ge_neutrophil:eQTLcatalogue/BLUEPRINT_ge_T-cell:eQTLcatalogue/Fairfax_2012_B-cell_CD19:eQTLcatalogue/Kasela_2017_T-cell_CD4:eQTLcatalogue/Kasela_2017_T-cell_CD8:eQTLcatalogue/Lepik_2017_ge_blood:eQTLcatalogue/Quach_2016_ge_monocyte_IAV:eQTLcatalogue/Quach_2016_ge_monocyte_LPS:eQTLcatalogue/Quach_2016_ge_monocyte_naive:eQTLcatalogue/Quach_2016_ge_monocyte_Pam3CSK4:eQTLcatal…	+	Yes	Promoter_anchored_loops:GM12878:IMR90:Mesenchymal_Stem_Cell	7.26009e-31	rs3814883;rs4787491;rs2005219;rs4238961;rs7201780;rs12917712;rs4787480;rs11150582;rs2887799;rs8063565;rs7186852;rs8047664;rs11150596;rs11865499;rs4341759;rs4787480:rs7201780:rs7186852:rs8063565:rs8063565;rs7186852:rs8047664	198
ENSG00000179965	ZNF771	16	30418618	30440920	0.295813	-1.29596	2	1.098	194	8.6825e-15	0	eQTLGen_cis_eQTLs:BIOSQTL/BIOS_eQTL_geneLevel:GTEx/v8/Whole_Blood:GTEx/v8/Artery_Aorta:GTEx/v8/Artery_Tibial:GTEx/v8/Esophagus_Mucosa	-	Yes	Promoter_anchored_loops:Adult_Cortex:Fetal_Cortex:Aorta:Left_Ventricle:Liver:Right_Ventricle:Spleen:GM12878:IMR90:Mesenchymal_Stem_Cell:Mesendoderm:Trophoblast-like_Cell:hESC	7.26009e-31	rs4238961;rs4787480;rs4787491;rs3814883;rs2005219;rs7201780;rs2887799;rs11150582;rs3814883:rs4787491:rs7186852:rs8063565:rs8055138:rs12448482:rs4787480:rs3814883;rs4787491:rs8063565;rs7186852:rs8047664:rs11150604;rs11864054:rs7184567;rs11150596:rs11865499;rs8063565:rs7500321:rs7184567;rs8063565;rs11150596:rs2005219:rs7201780:rs2887799	197;198
ENSG00000198064	RP11-347C12.1	16	30234258	30265831	NA	NA	0	0	174	4.31417e-241	0	eQTLcatalogue/CEDAR_neutrophil_CD15:eQTLcatalogue/CEDAR_transverse_colon:eQTLcatalogue/Fairfax_2012_B-cell_CD19:eQTLcatalogue/Fairfax_2014_LPS24:eQTLcatalogue/Fairfax_2014_naive:PsychENCODE_eQTLs:DICE/B_cell_naive:DICE/T_CD4_naive:DICE/T_CD8_naive:DICE/T_CD8_naive_activated:DICE/Monocyte_classical:DICE/Monocyte_non_classical:DICE/NK:DICE/T_CD4_TFH:DICE/T_CD4_TH1:DICE/T_CD4_TH17:DICE/T_CD4_TH1_17:…	+	No	NA	7.82226e-31	rs2887799;rs7201780;rs4238961;rs2005219;rs12917712;rs3814883;rs4787491;rs11150582	198
ENSG00000173369	C1QB	1	22979255	22988031	0.085881	0.026533	0	0	3	3.7074e-07	0.00336979	eQTLGen_trans_eQTLs	-	No	NA	7.23391e-30	rs8055138;rs151226	197
ENSG00000155363	MOV10	1	113215763	113243368	0.99809	-0.583157	0	0	3	5.7713e-06	0.0371531	eQTLGen_trans_eQTLs	-	No	NA	7.23391e-30	rs8055138;rs151226	197
ENSG00000004468	CD38	4	15779898	15854853	7.65671e-05	0.0901762	0	0	4	3.39e-08	0.000448885	eQTLGen_trans_eQTLs	-	No	NA	7.23391e-30	rs8055138;rs151226	197
ENSG00000188820	FAM26F	6	116782533	116784934	1.79932e-05	0.384834	0	0	2	2.5114e-06	0.0183948	eQTLGen_trans_eQTLs	-	No	NA	7.23391e-30	rs8055138;rs151226	197
ENSG00000086300	SNX10	7	26331541	26413949	0.00585751	-0.279272	20	10.55	27	1.06997e-100	0	eQTLcatalogue/TwinsUK_ge_fat:eQTLGen_cis_eQTLs:eQTLGen_trans_eQTLs:GTEx/v8/Adipose_Subcutaneous:GTEx/v8/Adipose_Visceral_Omentum:GTEx/v8/Adrenal_Gland:GTEx/v8/Artery_Coronary:GTEx/v8/Breast_Mammary_Tissue:GTEx/v8/Nerve_Tibial:GTEx/v8/Skin_Not_Sun_Exposed_Suprapubic:GTEx/v8/Skin_Sun_Exposed_Lower_leg	-	Yes	Liver:GM12878:IMR90:Mesenchymal_Stem_Cell:Mesendoderm:hESC	7.23391e-30	rs1534696;rs2698716;rs976346;rs8055138;rs151226;rs4722596	107;197
ENSG00000048405	ZNF800	7	126986844	127071978	0.997033	-0.105681	0	0	3	7.0784e-07	0.00608528	eQTLGen_trans_eQTLs	-	No	NA	7.23391e-30	rs8055138;rs151226	197
ENSG00000175073	VCPIP1	8	67540722	67579452	0.999341	-2.17055	0	0	2	8.7344e-07	0.00730049	eQTLGen_trans_eQTLs	-	Yes	Left_Ventricle:GM12878:IMR90:Mesenchymal_Stem_Cell:Mesendoderm:Trophoblast-like_Cell:hESC	7.23391e-30	rs8055138;rs151226;rs13275593	124;197
ENSG00000138119	MYOF	10	95066186	95242074	2.08401e-36	-0.140296	0	0	4	3.2312e-09	0.000104858	eQTLGen_trans_eQTLs	-	Yes	Mesenchymal_Stem_Cell	7.23391e-30	rs8055138;rs151226;rs11187845	142;197
ENSG00000183734	ASCL2	11	2289725	2292182	0.3889	NA	0	0	2	6.3387e-07	0.00558082	eQTLGen_trans_eQTLs	-	No	NA	7.23391e-30	rs8055138	197
ENSG00000134574	DDB2	11	47236493	47260767	0.00511791	0.677015	44	23	795	5.639e-181	0	eQTLcatalogue/BLUEPRINT_ge_monocyte:eQTLcatalogue/BrainSeq_ge_brain:eQTLcatalogue/CEDAR_monocyte_CD14:eQTLcatalogue/Fairfax_2014_naive:eQTLcatalogue/Quach_2016_ge_monocyte_IAV:eQTLcatalogue/Quach_2016_ge_monocyte_LPS:eQTLcatalogue/Quach_2016_ge_monocyte_naive:eQTLcatalogue/Quach_2016_ge_monocyte_R848:eQTLcatalogue/TwinsUK_ge_skin:DICE/Monocyte_classical:DICE/Monocyte_non_classical:eQTLGen_cis_eQT…	+	Yes	Promoter_anchored_loops	7.23391e-30	rs10838620;rs10769254;rs10838681;rs2305280;rs3136441;rs7928842;rs3781627;rs10838760;rs7941758;rs2697920;rs8055138;rs7118178;rs10838620:rs3136441:rs10838681:rs7118178:rs10838760	150;197
ENSG00000139410	SDSL	12	113860042	113876081	2.99136e-09	0.17536	0	0	2	8.0893e-07	0.00683087	eQTLGen_trans_eQTLs	-	No	NA	7.23391e-30	rs8055138	197
ENSG00000227051	C14orf132	14	96505661	96560417	NA	NA	0	0	5	1.0926e-07	0.00124407	eQTLGen_trans_eQTLs	+	No	NA	7.23391e-30	rs2726034;rs8055138;rs151226	197
ENSG00000100592	DAAM1	14	59655364	59838123	0.999991	1.58236	0	0	1	6.4462e-06	0.0406631	eQTLGen_trans_eQTLs	+	No	NA	7.23391e-30	rs8055138	197
ENSG00000092010	PSME1	14	24605367	24608176	0.0508808	NA	0	0	4	3.322e-07	0.00303641	eQTLGen_trans_eQTLs	-	No	NA	7.23391e-30	rs8055138;rs151226	197
ENSG00000100911	PSME2	14	24612574	24616779	0.108796	-0.280266	0	0	4	8.0893e-07	0.00683087	eQTLGen_trans_eQTLs	-	No	NA	7.23391e-30	rs8055138;rs151226	197
ENSG00000092098	RNF31	14	24615892	24629870	0.999719	-0.523643	0	0	1	3.5419e-06	0.024937	eQTLGen_trans_eQTLs	-	No	NA	7.23391e-30	rs8055138	197
ENSG00000140853	NLRC5	16	57023397	57117443	6.71794e-05	0.253522	1	3.547	24	1.2318e-16	0	eQTLGen_cis_eQTLs:eQTLGen_trans_eQTLs:BIOSQTL/BIOS_eQTL_geneLevel:GTEx/v8/Cells_Cultured_fibroblasts	+	Yes	EP_correlation_cell_type_oneway:GM12878:IMR90:Mesenchymal_Stem_Cell	7.23391e-30	rs4784745;rs4783962;rs8055138;rs6499861;rs2895432:rs12596776:rs12446275:rs1366544:rs4783962:rs6499861	197;200
ENSG00000126561	STAT5A	17	40439565	40463961	0.999866	-0.759016	0	0	9	2.8712e-09	2.59471e-05	eQTLGen_cis_eQTLs:eQTLGen_trans_eQTLs	-	Yes	Promoter_anchored_loops:Adult_Cortex:Adrenal:Aorta:Bladder:Left_Ventricle:Liver:Lung:Pancreas:Psoas:Right_Ventricle:Spleen:GM12878:IMR90:Mesenchymal_Stem_Cell:Mesendoderm:Neural_Progenitor_Cell:Trophoblast-like_Cell:hESC	7.23391e-30	rs676387;rs8055138;rs151226	197;211
ENSG00000261740	RP11-345J4.5	16	29454551	29465972	NA	NA	0	0	162	0	0	PsychENCODE_eQTLs:DICE/T_CD4_naive_activated:eQTLGen_cis_eQTLs:xQTLServer_eQTLs	-	No	NA	1.2119e-29	rs12917712;rs3814883;rs4787491;rs2005219;rs11150582;rs7201780;rs2887799;rs4238961	198
ENSG00000169221	TBC1D10B	16	30368423	30381585	0.981784	-0.103269	2	12.92	121	2.2851e-15	0	eQTLcatalogue/Nedelec_2016_ge_macrophage_Salmonella:DICE/Monocyte_classical:eQTLGen_cis_eQTLs:BIOSQTL/BIOS_eQTL_geneLevel:GTEx/v8/Brain_Cortex:GTEx/v8/Esophagus_Mucosa	-	Yes	Promoter_anchored_loops:Adult_Cortex:Fetal_Cortex:Left_Ventricle:Liver:Right_Ventricle:GM12878:IMR90:Mesenchymal_Stem_Cell:Mesendoderm:Trophoblast-like_Cell:hESC	1.52972e-29	rs4238961;rs3814883;rs4787491;rs2005219;rs7201780;rs2887799;rs4787491:rs3814883:rs12448482:rs3814883;rs4787491:rs7186852:rs8063565:rs8063565;rs7186852:rs8047664:rs7184567;rs8063565;rs11150596:rs8055138:rs11864054:rs7184567;rs11150596:rs11150604;rs11864054:rs11865499;rs8063565:rs7184567;rs11865499:rs11150604:rs4787480:rs2005219	197;198
ENSG00000184489	PTP4A3	8	142402093	142441620	0.12767	-0.840871	0	0	2	2.8437e-06	0.0207148	eQTLGen_trans_eQTLs	-	No	NA	1.70366e-29	rs3814883;rs4787491	198
ENSG00000189045	ANKDD1B	5	74907284	74967671	NA	0.593695	107	45	819	1.9508e-32	0	eQTLcatalogue/BLUEPRINT_ge_monocyte:eQTLcatalogue/BrainSeq_ge_brain:eQTLcatalogue/CEDAR_rectum:eQTLcatalogue/CEDAR_transverse_colon:eQTLcatalogue/TwinsUK_ge_LCL:eQTLcatalogue/TwinsUK_ge_skin:PsychENCODE_eQTLs:DICE/T_CD4_naive:DICE/T_CD8_naive:DICE/T_CD4_TH1:DICE/T_CD4_TH17:DICE/T_CD4_TH1_17:DICE/T_CD4_TH2:DICE/T_CD4_memory_TREG:DICE/T_CD4_naive_TREG:eQTLGen_cis_eQTLs:BIOSQTL/BIOS_eQTL_geneLevel:C…	+	Yes	Aorta:Left_Ventricle:Liver:Right_Ventricle:GM12878:IMR90:Mesenchymal_Stem_Cell:Mesendoderm:Neural_Progenitor_Cell:Trophoblast-like_Cell:hESC	4.40814e-29	rs6453133;rs13356670;rs4512110;rs2303647;rs34341;rs6871667;rs34344;rs17649350;rs2307111;rs10515214;rs2047059;rs888789;rs258496;rs4301212;rs9942407;rs7700719;rs7710706;rs7708899;rs11957690;rs6453133:rs2047059:rs2307111;rs34341:rs6453133:rs34341;rs6871667:rs34341;rs6871667:rs4512110;rs2303647:rs7700719:rs6453106;rs7700719:rs11957690:rs7708899;rs11957690:rs7708899:rs7710706:rs9942407:rs6453133;rs343…	78
ENSG00000176928	GCNT4	5	74323289	74326724	0.021235	1.25008	18	18.72	704	9.94407e-65	0	eQTLcatalogue/Lepik_2017_ge_blood:eQTLcatalogue/Quach_2016_ge_monocyte_naive:eQTLcatalogue/Quach_2016_ge_monocyte_Pam3CSK4:eQTLcatalogue/Quach_2016_ge_monocyte_R848:eQTLGen_cis_eQTLs:BRAINEAC/THAL:GTEx/v8/Adrenal_Gland:GTEx/v8/Whole_Blood:GTEx/v8/Artery_Aorta:GTEx/v8/Artery_Coronary:GTEx/v8/Artery_Tibial:GTEx/v8/Colon_Transverse:GTEx/v8/Esophagus_Mucosa:GTEx/v8/Esophagus_Muscularis:GTEx/v8/Heart_…	+	No	NA	4.40814e-29	rs11957690;rs7708899;rs4301212;rs7700719;rs6453106;rs9942407;rs6871667;rs34341;rs6453133;rs34344;rs2307111;rs2047059;rs7710706;rs4512110;rs2303647;rs13356670;rs888789;rs258496;rs17649350	78
ENSG00000113161	HMGCR	5	74632154	74657929	0.999837	-0.514442	35	12.4	606	1.2137e-50	0	eQTLcatalogue/TwinsUK_ge_skin:PsychENCODE_eQTLs:eQTLGen_cis_eQTLs:BIOSQTL/BIOS_eQTL_geneLevel:CMC_SVA_cis:GTEx/v8/Muscle_Skeletal	-	Yes	Promoter_anchored_loops:GM12878	4.40814e-29	rs34341;rs6871667;rs13356670;rs6453133;rs4512110;rs2303647;rs7700719;rs6453106;rs7708899;rs11957690;rs7710706;rs9942407;rs34344;rs17649350;rs2307111;rs2047059;rs888789;rs258496;rs2303647:rs2047059:rs2307111	78
ENSG00000152359	POC5	5	74969949	75013313	0.00213816	0.193562	185	45	874	3.27170000000001e-310	0	eQTLcatalogue/Alasoo_2018_ge_macrophage_naive:eQTLcatalogue/BLUEPRINT_ge_monocyte:eQTLcatalogue/BLUEPRINT_ge_neutrophil:eQTLcatalogue/BLUEPRINT_ge_T-cell:eQTLcatalogue/BrainSeq_ge_brain:eQTLcatalogue/CEDAR_B-cell_CD19:eQTLcatalogue/CEDAR_neutrophil_CD15:eQTLcatalogue/Fairfax_2012_B-cell_CD19:eQTLcatalogue/Fairfax_2014_LPS2:eQTLcatalogue/Fairfax_2014_naive:eQTLcatalogue/GENCORD_ge_LCL:eQTLcatalogu…	-	Yes	Aorta:Left_Ventricle:Liver:GM12878:IMR90:Mesenchymal_Stem_Cell:Mesendoderm:Trophoblast-like_Cell:hESC	4.40814e-29	rs34344;rs17649350;rs2307111;rs2047059;rs10515214;rs34341;rs4512110;rs2303647;rs888789;rs4301212;rs6453133;rs258496;rs6453106;rs7700719;rs7708899;rs11957690;rs6871667;rs13356670;rs7710706;rs9942407;rs6453133:rs7700719:rs9942407:rs4512110;rs2303647:rs6453133:rs34341;rs6871667:rs34341;rs6871667:rs11957690:rs7708899:rs7710706:rs2047059:rs2307111;rs34341:rs6453106;rs7700719:rs7708899;rs11957690:rs430…	78
ENSG00000122008	POLK	5	74807581	74896969	5.99896e-07	-0.474863	71	14.51	707	4.0249e-13	3.23786e-09	eQTLcatalogue/TwinsUK_ge_LCL:BIOSQTL/BIOS_eQTL_geneLevel:GTEx/v8/Adipose_Subcutaneous:GTEx/v8/Adipose_Visceral_Omentum:GTEx/v8/Artery_Aorta:GTEx/v8/Artery_Tibial:GTEx/v8/Brain_Caudate_basal_ganglia:GTEx/v8/Brain_Cerebellar_Hemisphere:GTEx/v8/Brain_Cerebellum:GTEx/v8/Esophagus_Muscularis:GTEx/v8/Heart_Left_Ventricle:GTEx/v8/Lung:GTEx/v8/Nerve_Tibial:GTEx/v8/Pancreas:GTEx/v8/Pituitary:GTEx/v8/Prost…	-	Yes	Promoter_anchored_loops:Adult_Cortex:Fetal_Cortex:Left_Ventricle:Liver:GM12878:IMR90:Mesenchymal_Stem_Cell:Mesendoderm:Trophoblast-like_Cell:hESC	4.40814e-29	rs4512110;rs2303647;rs13356670;rs6453133;rs34341;rs6871667;rs11957690;rs9942407;rs2307111;rs10515214;rs34344;rs17649350;rs2047059;rs4301212;rs6453106;rs7700719;rs7708899;rs7710706;rs888789;rs2303647:rs4512110:rs9942407:rs2047059:rs2307111;rs34341:rs13356670;rs6453133:rs17649350:rs2303647:rs6453133:rs34341;rs6871667:rs7700719:rs6453133;rs34344:rs34344;rs17649350:rs34344:rs11957690:rs7708899:rs7710…	78
ENSG00000180096	SEPT1	16	30389454	30407312	0.00293747	NA	1	12.92	133	8.69183e-25	9.51604e-31	eQTLcatalogue/Fairfax_2014_LPS24:eQTLcatalogue/Nedelec_2016_ge_macrophage_naive:eQTLcatalogue/TwinsUK_ge_fat:eQTLcatalogue/TwinsUK_ge_skin:eQTLGen_cis_eQTLs:BIOSQTL/BIOS_eQTL_geneLevel:xQTLServer_eQTLs:CMC_SVA_cis:GTEx/v8/Adipose_Subcutaneous:GTEx/v8/Adipose_Visceral_Omentum:GTEx/v8/Artery_Aorta:GTEx/v8/Artery_Tibial:GTEx/v8/Brain_Anterior_cingulate_cortex_BA24:GTEx/v8/Brain_Caudate_basal_ganglia…	-	Yes	Adult_Cortex:Fetal_Cortex:Aorta:Left_Ventricle:Liver:Right_Ventricle:Spleen:GM12878:IMR90:Mesenchymal_Stem_Cell:Mesendoderm:Trophoblast-like_Cell:hESC	4.65387e-29	rs4238961;rs2887799;rs7201780;rs2005219;rs4787480;rs3814883;rs4787491;rs11150604;rs11864054;rs3814883:rs4787491:rs7186852:rs8063565:rs3814883;rs4787491:rs8063565;rs7186852:rs8047664:rs8055138:rs12448482:rs7500321:rs7184567;rs8063565;rs11150596:rs7184567;rs11150596:rs2005219:rs7201780:rs2887799	197;198
ENSG00000167194	C16orf92	16	30034655	30039057	0.0189254	0.293839	31	15.67	2	4.4573e-05	0.0262841	BIOSQTL/BIOS_eQTL_geneLevel	+	Yes	Promoter_anchored_loops:GM12878:IMR90:Mesenchymal_Stem_Cell	4.65387e-29	rs3814883;rs4787491;rs11150582;rs7201780;rs4787480:rs3814883;rs4787491:rs11864054:rs11150596:rs8063565;rs11150596:rs7184567;rs11150596:rs11150604:rs4787491:rs3814883	198
ENSG00000080603	SRCAP	16	30709530	30755602	1	-0.382912	20	7.962	40	2.9974e-06	0.00869066	eQTLGen_cis_eQTLs:GTEx/v8/Esophagus_Mucosa	+	Yes	Promoter_anchored_loops:Adult_Cortex:Fetal_Cortex:Left_Ventricle:Liver:Spleen:GM12878:IMR90:Mesenchymal_Stem_Cell:Mesendoderm:Trophoblast-like_Cell:hESC	4.65387e-29	rs8063565;rs7186852;rs8047664;rs11150596;rs11865499;rs11150604;rs11864054;rs8063565:rs3814883:rs7186852:rs11864054:rs7184567;rs11150596:rs4787480:rs3814883;rs4787491:rs7184567;rs11150596:rs11865499;rs8063565:rs11150604;rs11864054:rs8055138:rs12448482:rs7500321:rs4787491:rs2005219	197;198
ENSG00000156860	FBRS	16	30669752	30682135	0.981525	NA	9	22.9	63	2.44247e-07	0.000261032	BIOSQTL/BIOS_eQTL_geneLevel:GTEx/v8/Nerve_Tibial:GTEx/v8/Uterus	-	Yes	Promoter_anchored_loops:Adult_Cortex:Fetal_Cortex:Left_Ventricle:Liver:GM12878:IMR90:Mesenchymal_Stem_Cell:Mesendoderm:Trophoblast-like_Cell:hESC	7.5586e-29	rs7186852;rs8063565;rs8047664;rs11150596;rs4341759;rs7186852:rs8047664:rs8063565:rs7184567;rs11150596:rs3814883:rs3814883;rs4787491:rs4787491:rs7186852:rs7184567;rs11150596:rs7184567;rs11865499:rs11150604:rs11864054:rs11150604;rs11864054:rs11865499;rs8063565:rs12448482:rs7500321	197;198
ENSG00000180209	MYLPF	16	30382255	30389312	0.602001	-0.35594	2	12.92	35	5.25161e-07	0.000251076	GTEx/v8/Thyroid	+	Yes	Promoter_anchored_loops:Adult_Cortex:Fetal_Cortex:Left_Ventricle:Liver:Right_Ventricle:GM12878:IMR90:Mesenchymal_Stem_Cell:Mesendoderm:Trophoblast-like_Cell:hESC	7.5586e-29	rs4238961;rs2887799;rs7201780;rs4787491:rs3814883:rs12448482:rs3814883;rs4787491:rs7186852:rs8063565:rs8063565;rs7186852:rs8047664:rs7184567;rs8063565;rs11150596:rs8055138:rs11864054:rs7184567;rs11150596:rs11150604;rs11864054:rs11865499;rs8063565:rs7184567;rs11865499:rs11150604:rs4787480:rs2005219	197;198
ENSG00000156858	PRR14	16	30662038	30667761	0.258591	NA	8	22.9	315	4.1841e-39	0	eQTLGen_cis_eQTLs:BIOSQTL/BIOS_eQTL_geneLevel:GTEx/v8/Adipose_Subcutaneous:GTEx/v8/Adipose_Visceral_Omentum:GTEx/v8/Artery_Tibial:GTEx/v8/Colon_Sigmoid:GTEx/v8/Esophagus_Gastroesophageal_Junction:GTEx/v8/Esophagus_Mucosa:GTEx/v8/Esophagus_Muscularis:GTEx/v8/Skin_Not_Sun_Exposed_Suprapubic:GTEx/v8/Thyroid	-	Yes	Promoter_anchored_loops:Adult_Cortex:Fetal_Cortex:Left_Ventricle:Liver:GM12878:IMR90:Mesenchymal_Stem_Cell:Mesendoderm:Trophoblast-like_Cell:hESC	7.5586e-29	rs7186852;rs8063565;rs11150596;rs11864054;rs11150604;rs7184567;rs11865499;rs7186852:rs8047664:rs8063565:rs7184567;rs11150596:rs3814883:rs3814883;rs4787491:rs4787491:rs7186852:rs7184567;rs11150596:rs7184567;rs11865499:rs11150604:rs11864054:rs11150604;rs11864054:rs11865499;rs8063565:rs12448482:rs7500321	197;198
ENSG00000179918	SEPHS2	16	30454952	30457502	0.00178605	-0.240134	0	0	139	9.69321e-39	0	eQTLcatalogue/Alasoo_2018_ge_macrophage_IFNg:eQTLcatalogue/Fairfax_2012_B-cell_CD19:eQTLcatalogue/Fairfax_2014_IFN24:eQTLGen_cis_eQTLs:BIOSQTL/BIOS_eQTL_geneLevel	-	Yes	Adult_Cortex:Fetal_Cortex:Left_Ventricle:Liver:GM12878:IMR90:Mesenchymal_Stem_Cell:Mesendoderm:Trophoblast-like_Cell:hESC	1.14603e-28	rs4341759;rs2005219;rs7201780;rs2887799;rs4238961;rs2230433;rs7186852;rs12917712;rs4787491;rs3814883:rs7186852:rs8063565:rs7184567;rs8063565;rs11150596:rs8055138:rs151226:rs4787491:rs8063565;rs7186852:rs8047664:rs11864054	197;198
ENSG00000104518	GSDMD	8	144635377	144645232	4.80695e-07	NA	0	0	1	5.679e-06	0.0366292	eQTLGen_trans_eQTLs	-	No	NA	1.79614e-28	rs8055138	197
ENSG00000167081	PBX3	9	128509624	128729656	0.592665	-0.360121	0	0	1	2.6583e-06	0.0195641	eQTLGen_trans_eQTLs	-	No	NA	1.79614e-28	rs8055138	197
ENSG00000178573	MAF	16	79619740	79634611	0.429001	NA	0	0	4	9.1449e-07	0.00757249	eQTLGen_trans_eQTLs	-	No	NA	1.79614e-28	rs2726034;rs8055138	197
ENSG00000268863	AC135048.1	16	30996808	30997533	NA	NA	18	19.75	223	1.06007e-50	0	BIOSQTL/BIOS_eQTL_geneLevel	-	Yes	Promoter_anchored_loops	3.91021e-28	rs7184567;rs11150596;rs11150604;rs11864054;rs8063565;rs11865499;rs17708638;rs1052352;rs4889649;rs4787491:rs11150604:rs7184567:rs11865499	198
ENSG00000140691	ARMC5	16	31469401	31478487	0.0462925	-1.06105	0	0	290	1.9062e-14	0	eQTLGen_cis_eQTLs:BIOSQTL/BIOS_eQTL_geneLevel:GTEx/v8/Nerve_Tibial:GTEx/v8/Cells_Cultured_fibroblasts	+	Yes	Promoter_anchored_loops:EP_correlation_cell_type_oneway:Adult_Cortex:Fetal_Cortex:Left_Ventricle:Liver:Spleen:GM12878:IMR90:Mesenchymal_Stem_Cell:Mesendoderm:Trophoblast-like_Cell:hESC	3.91021e-28	rs11150596;rs11864054;rs11150604;rs7184567;rs8063565;rs11865499;rs17708638;rs1052352;rs4889649;rs11150604:rs7184567:rs7184567;rs11865499:rs17708638:rs1052352:rs7184567;rs11150596:rs4889649:rs7184567;rs11150596:rs11150604;rs11864054:rs11865499;rs8063565:rs8063565	198
ENSG00000103507	BCKDK	16	31117428	31124110	0.00580436	-0.219605	35	13.16	474	1.7301e-210	0	eQTLcatalogue/BLUEPRINT_ge_monocyte:eQTLcatalogue/CEDAR_monocyte_CD14:eQTLcatalogue/Fairfax_2014_naive:eQTLcatalogue/Lepik_2017_ge_blood:eQTLGen_cis_eQTLs:BIOSQTL/BIOS_eQTL_geneLevel:BRAINEAC/HIPP:GTEx/v8/Whole_Blood:GTEx/v8/Esophagus_Mucosa:GTEx/v8/Muscle_Skeletal:GTEx/v8/Pancreas:GTEx/v8/Skin_Sun_Exposed_Lower_leg	-	Yes	GM12878:IMR90	3.91021e-28	rs11150604;rs7184567;rs11865499;rs11864054;rs11150596;rs8063565;rs17708638;rs1052352;rs4889649;rs2887799;rs4341759;rs7186852;rs8047664;rs4889649:rs17708638:rs7184567:rs11150604	198
ENSG00000099385	BCL7C	16	30844947	30906281	0.150444	NA	58	9.983	313	3.7648e-17	0	eQTLGen_cis_eQTLs:BIOSQTL/BIOS_eQTL_geneLevel:GTEx/v8/Brain_Cerebellum:GTEx/v8/Muscle_Skeletal:GTEx/v8/Nerve_Tibial:GTEx/v8/Cells_Cultured_fibroblasts:GTEx/v8/Skin_Sun_Exposed_Lower_leg:GTEx/v8/Thyroid	-	Yes	Promoter_anchored_loops:Adult_Cortex:Fetal_Cortex:Aorta:Dorsolateral_Prefrontal_Cortex:Hippocampus:Left_Ventricle:Liver:Spleen:GM12878:IMR90:Mesenchymal_Stem_Cell:Mesendoderm:Neural_Progenitor_Cell:Trophoblast-like_Cell:hESC	3.91021e-28	rs11150596;rs8063565;rs8047664;rs11864054;rs11150604;rs7184567;rs11865499;rs7186852;rs2887799;rs2230433;rs17708638;rs8063565:rs3814883:rs7186852:rs11864054:rs7184567;rs11150596:rs11150604;rs11864054:rs11865499;rs8063565:rs7184567;rs11865499:rs11150604:rs17708638:rs1052352:rs8063565;rs7186852:rs8047664:rs11150596:rs8063565	198
ENSG00000099377	HSD3B7	16	30996519	31000473	4.64185e-06	-0.867417	18	19.75	493	1.1373e-128	0	eQTLcatalogue/BLUEPRINT_ge_monocyte:eQTLcatalogue/CEDAR_ileum:eQTLcatalogue/CEDAR_transverse_colon:eQTLcatalogue/Fairfax_2014_LPS24:eQTLcatalogue/Fairfax_2014_naive:eQTLcatalogue/HipSci_ge_iPSC:eQTLcatalogue/Lepik_2017_ge_blood:eQTLcatalogue/Quach_2016_ge_monocyte_IAV:eQTLcatalogue/Quach_2016_ge_monocyte_LPS:eQTLcatalogue/Quach_2016_ge_monocyte_naive:eQTLcatalogue/Quach_2016_ge_monocyte_Pam3CSK4:…	+	Yes	Promoter_anchored_loops	3.91021e-28	rs7184567;rs11150596;rs11150604;rs11864054;rs1052352;rs11865499;rs8063565;rs17708638;rs4889649;rs7186852;rs3814883;rs4341759;rs2887799;rs4787491:rs11150604:rs7184567:rs11865499	198
ENSG00000156886	ITGAD	16	31404633	31437826	6.33152e-12	0.44487	0	0	391	1.4978e-271	0	eQTLcatalogue/BLUEPRINT_ge_neutrophil:eQTLcatalogue/Lepik_2017_ge_blood:eQTLcatalogue/Naranbhai_2015_neutrophil_CD16:eQTLGen_cis_eQTLs:BIOSQTL/BIOS_eQTL_geneLevel:GTEx/v8/Whole_Blood	-	No	NA	3.91021e-28	rs17708638;rs4341759;rs8063565;rs8047664;rs7186852;rs11150596;rs11864054;rs11150604;rs7184567;rs11865499;rs1052352;rs4889649	198
ENSG00000005844	ITGAL	16	30483979	30534506	0.43034	-1.03162	5	11.58	355	1.4513e-47	0	eQTLcatalogue/Fairfax_2014_IFN24:eQTLcatalogue/Lepik_2017_ge_blood:eQTLGen_cis_eQTLs:CMC_SVA_cis:CMC_NoSVA_cis:GTEx/v8/Cells_Cultured_fibroblasts	+	Yes	Promoter_anchored_loops:IMR90:Mesenchymal_Stem_Cell	3.91021e-28	rs4341759;rs2230433;rs3814883;rs7201780;rs2005219;rs2887799;rs4238961;rs7186852;rs11150596;rs11864054;rs11150604;rs7184567;rs8063565;rs11865499;rs17708638;rs1052352;rs4889649;rs2887799:rs8063565;rs11150596:rs11150596:rs7186852:rs8063565	198
ENSG00000169896	ITGAM	16	31271311	31344213	1.33564e-08	0.286497	61	10.8	443	6.2932e-95	0	eQTLcatalogue/CEDAR_monocyte_CD14:eQTLcatalogue/CEDAR_platelet:eQTLcatalogue/Fairfax_2014_IFN24:eQTLcatalogue/Fairfax_2014_LPS24:eQTLcatalogue/Fairfax_2014_LPS2:eQTLcatalogue/Fairfax_2014_naive:eQTLcatalogue/TwinsUK_ge_blood:DICE/B_cell_naive:eQTLGen_cis_eQTLs:GTEx/v8/Adipose_Subcutaneous:GTEx/v8/Artery_Aorta:GTEx/v8/Breast_Mammary_Tissue:GTEx/v8/Skin_Not_Sun_Exposed_Suprapubic:GTEx/v8/Skin_Sun_E…	-	Yes	Left_Ventricle:Liver:GM12878:IMR90:Mesenchymal_Stem_Cell:Mesendoderm:Trophoblast-like_Cell:hESC	3.91021e-28	rs17708638;rs4889649;rs11150596;rs7184567;rs8063565;rs11150604;rs11865499;rs1052352;rs7186852;rs11864054;rs9939450:rs4889649:rs17708638:rs1052352	197;198
ENSG00000140678	ITGAX	16	31366455	31394318	6.11157e-05	0.796194	20	24.3	460	3.27167000000001e-310	0	eQTLcatalogue/BLUEPRINT_ge_monocyte:eQTLcatalogue/BLUEPRINT_ge_neutrophil:eQTLcatalogue/CEDAR_monocyte_CD14:eQTLcatalogue/CEDAR_neutrophil_CD15:eQTLcatalogue/Fairfax_2014_IFN24:eQTLcatalogue/Fairfax_2014_LPS24:eQTLcatalogue/Fairfax_2014_LPS2:eQTLcatalogue/Fairfax_2014_naive:eQTLcatalogue/Kasela_2017_T-cell_CD8:eQTLcatalogue/Lepik_2017_ge_blood:eQTLcatalogue/Naranbhai_2015_neutrophil_CD16:eQTLcata…	-	Yes	Promoter_anchored_loops:GM12878:IMR90:Mesenchymal_Stem_Cell:Mesendoderm:hESC	3.91021e-28	rs4889649;rs17708638;rs1052352;rs7184567;rs11150596;rs11865499;rs11150604;rs11864054;rs8063565;rs4341759;rs7186852;rs8047664;rs11150604:rs7184567:rs17708638:rs4889649	198
ENSG00000103510	KAT8	16	31127075	31142714	0.912576	0.0373929	37	13.16	490	2.142e-152	0	eQTLcatalogue/Alasoo_2018_ge_macrophage_IFNg:eQTLcatalogue/BrainSeq_ge_brain:eQTLcatalogue/CEDAR_B-cell_CD19:eQTLcatalogue/CEDAR_T-cell_CD4:eQTLcatalogue/CEDAR_T-cell_CD8:eQTLcatalogue/Fairfax_2012_B-cell_CD19:eQTLcatalogue/Fairfax_2014_LPS2:eQTLcatalogue/Fairfax_2014_naive:eQTLcatalogue/GENCORD_ge_fibroblast:eQTLcatalogue/GENCORD_ge_LCL:eQTLcatalogue/GEUVADIS_ge_LCL:eQTLcatalogue/HipSci_ge_iPSC:…	+	No	NA	3.91021e-28	rs11150604;rs11865499;rs7184567;rs8063565;rs17708638;rs11150596;rs11864054;rs1052352;rs4889649;rs7186852;rs2887799;rs7201780;rs2005219;rs4238961;rs4341759;rs2230433;rs8047664	198
ENSG00000175938	ORAI3	16	30960387	30967782	0.0109507	-0.705291	11	14.58	129	7.5754e-07	0.000849814	eQTLGen_cis_eQTLs:BIOSQTL/BIOS_eQTL_geneLevel:GTEx/v8/Adipose_Visceral_Omentum	+	Yes	Adult_Cortex:Fetal_Cortex:GM12878:IMR90:Mesenchymal_Stem_Cell:Mesendoderm:Trophoblast-like_Cell	3.91021e-28	rs11150604;rs11864054;rs7184567;rs11150596;rs11865499;rs8063565;rs4889649;rs1052352;rs7186852:rs8063565:rs11864054:rs7184567;rs11150596:rs7184567;rs11865499:rs11150604:rs17708638:rs1052352:rs3814883:rs8063565;rs7186852:rs8047664	198
ENSG00000178226	PRSS36	16	31150246	31161415	4.42359e-13	-0.151363	17	14.24	422	9.7144e-49	0	eQTLcatalogue/BrainSeq_ge_brain:eQTLcatalogue/Lepik_2017_ge_blood:eQTLcatalogue/Nedelec_2016_ge_macrophage_Listeria:eQTLcatalogue/Nedelec_2016_ge_macrophage_naive:eQTLcatalogue/Nedelec_2016_ge_macrophage_Salmonella:PsychENCODE_eQTLs:eQTLGen_cis_eQTLs:BIOSQTL/BIOS_eQTL_geneLevel:GTEx/v8/Adipose_Subcutaneous:GTEx/v8/Adipose_Visceral_Omentum:GTEx/v8/Adrenal_Gland:GTEx/v8/Artery_Aorta:GTEx/v8/Artery_…	+	No	NA	3.91021e-28	rs11150604;rs11865499;rs17708638;rs1052352;rs8063565;rs7186852;rs11150596;rs7184567;rs2230433;rs11864054;rs4889649	198
ENSG00000151006	PRSS53	16	31094746	31100949	7.27162e-11	-0.0562692	21	20.3	437	6.619e-83	0	eQTLcatalogue/CEDAR_ileum:eQTLcatalogue/CEDAR_T-cell_CD4:eQTLcatalogue/Fairfax_2012_B-cell_CD19:eQTLcatalogue/Fairfax_2014_naive:PsychENCODE_eQTLs:eQTLGen_cis_eQTLs:BIOSQTL/BIOS_eQTL_geneLevel:GTEx/v8/Adipose_Subcutaneous:GTEx/v8/Whole_Blood:GTEx/v8/Artery_Aorta:GTEx/v8/Artery_Tibial:GTEx/v8/Brain_Caudate_basal_ganglia:GTEx/v8/Breast_Mammary_Tissue:GTEx/v8/Colon_Sigmoid:GTEx/v8/Esophagus_Mucosa:G…	-	No	NA	3.91021e-28	rs11150604;rs7184567;rs11865499;rs11864054;rs8063565;rs11150596;rs4889649;rs7186852;rs17708638;rs1052352;rs8047664	198
ENSG00000169900	PYDC1	16	31227283	31228680	0.46527	-0.622103	5	18.74	267	5.86471e-40	1.38705e-33	PsychENCODE_eQTLs:CMC_SVA_cis:GTEx/v8/Brain_Cerebellum:GTEx/v8/Brain_Frontal_Cortex_BA9:GTEx/v8/Brain_Nucleus_accumbens_basal_ganglia:GTEx/v8/Muscle_Skeletal:GTEx/v8/Skin_Not_Sun_Exposed_Suprapubic:GTEx/v8/Skin_Sun_Exposed_Lower_leg	-	Yes	GM12878:Mesendoderm:hESC	3.91021e-28	rs1052352;rs17708638;rs4889649;rs11150604;rs11864054;rs11150596;rs7184567;rs8063565;rs11865499;rs4889649:rs17708638	198
ENSG00000255439	RP11-196G11.1	16	31094760	31106277	NA	NA	27	20.3	281	2.60261e-30	0	BIOSQTL/BIOS_eQTL_geneLevel	-	Yes	Promoter_anchored_loops:GM12878:IMR90	3.91021e-28	rs11150604;rs7184567;rs11865499;rs11150596;rs8063565;rs11864054;rs17708638;rs1052352;rs4889649;rs7186852:rs11150604:rs7184567:rs7184567;rs11150596:rs4889649:rs17708638	198
ENSG00000099381	SETD1A	16	30968615	30996437	0.999996	-0.894969	36	19.75	367	1.963e-44	0	eQTLcatalogue/GEUVADIS_ge_LCL:eQTLGen_cis_eQTLs:BIOSQTL/BIOS_eQTL_geneLevel:GTEx/v8/Adipose_Visceral_Omentum:GTEx/v8/Whole_Blood:GTEx/v8/Brain_Cerebellum:GTEx/v8/Esophagus_Gastroesophageal_Junction:GTEx/v8/Esophagus_Mucosa:GTEx/v8/Heart_Left_Ventricle:GTEx/v8/Lung:GTEx/v8/Muscle_Skeletal:GTEx/v8/Cells_Cultured_fibroblasts:GTEx/v8/Spleen:GTEx/v8/Stomach	+	Yes	Promoter_anchored_loops	3.91021e-28	rs7184567;rs11150596;rs11865499;rs8063565;rs11150604;rs11864054;rs4341759;rs7186852;rs17708638;rs1052352;rs4889649;rs7184567:rs7184567;rs11865499:rs11150604	198
ENSG00000099365	STX1B	16	31000577	31021949	0.944475	-1.61045	32	19.75	462	1.19113e-47	0	eQTLcatalogue/Fairfax_2014_IFN24:eQTLcatalogue/Fairfax_2014_LPS24:eQTLcatalogue/TwinsUK_ge_skin:DICE/Monocyte_classical:eQTLGen_cis_eQTLs:BIOSQTL/BIOS_eQTL_geneLevel:xQTLServer_eQTLs:GTEx/v8/Adipose_Subcutaneous:GTEx/v8/Adipose_Visceral_Omentum:GTEx/v8/Adrenal_Gland:GTEx/v8/Whole_Blood:GTEx/v8/Artery_Aorta:GTEx/v8/Artery_Coronary:GTEx/v8/Artery_Tibial:GTEx/v8/Brain_Cerebellar_Hemisphere:GTEx/v8/B…	+	Yes	Promoter_anchored_loops	3.91021e-28	rs11150604;rs7184567;rs11150596;rs11864054;rs8063565;rs11865499;rs4889649;rs7186852;rs17708638;rs1052352;rs4341759	198
ENSG00000103496	STX4	16	31044210	31054296	9.66202e-05	-0.421868	33	21.6	461	3.27170000000001e-310	0	eQTLcatalogue/BLUEPRINT_ge_monocyte:eQTLcatalogue/BLUEPRINT_ge_T-cell:eQTLcatalogue/BrainSeq_ge_brain:eQTLcatalogue/GENCORD_ge_LCL:eQTLcatalogue/GENCORD_ge_T-cell:eQTLcatalogue/GEUVADIS_ge_LCL:eQTLcatalogue/Lepik_2017_ge_blood:eQTLcatalogue/Quach_2016_ge_monocyte_LPS:eQTLcatalogue/Quach_2016_ge_monocyte_naive:eQTLcatalogue/Quach_2016_ge_monocyte_Pam3CSK4:eQTLcatalogue/Quach_2016_ge_monocyte_R848:…	+	Yes	EP_correlation_cell_type_oneway:Adult_Cortex:Fetal_Cortex:GM12878:IMR90	3.91021e-28	rs7184567;rs11150604;rs11150596;rs11865499;rs17708638;rs8063565;rs11864054;rs1052352;rs7186852;rs4341759;rs2230433;rs8047664;rs4889649;rs17708638:rs4889649:rs8063565:rs7184567;rs11150596:rs7184567;rs11150596:rs11150604;rs11864054:rs11865499;rs8063565:rs7184567;rs11865499:rs11150604:rs1052352:rs7186852:rs7184567	198
ENSG00000167397	VKORC1	16	31102163	31107301	0.0818031	-0.611113	21	14.35	489	7.73338e-51	0	eQTLcatalogue/CEDAR_ileum:eQTLcatalogue/Fairfax_2014_LPS24:eQTLcatalogue/Fairfax_2014_LPS2:eQTLcatalogue/Fairfax_2014_naive:eQTLcatalogue/GENCORD_ge_fibroblast:eQTLcatalogue/Nedelec_2016_ge_macrophage_Listeria:PsychENCODE_eQTLs:eQTLGen_cis_eQTLs:BIOSQTL/BIOS_eQTL_geneLevel:GTEx/v8/Adipose_Subcutaneous:GTEx/v8/Adipose_Visceral_Omentum:GTEx/v8/Adrenal_Gland:GTEx/v8/Whole_Blood:GTEx/v8/Artery_Aorta:…	-	No	NA	3.91021e-28	rs7184567;rs11865499;rs11150604;rs7186852;rs8063565;rs11150596;rs11864054;rs17708638;rs1052352;rs4889649;rs8047664	198
ENSG00000167395	ZNF646	16	31085743	31095517	0.00556536	0.564564	29	20.3	392	5.4208e-37	0	PsychENCODE_eQTLs:eQTLGen_cis_eQTLs:BIOSQTL/BIOS_eQTL_geneLevel:CMC_SVA_cis:GTEx/v8/Adipose_Subcutaneous:GTEx/v8/Adrenal_Gland:GTEx/v8/Artery_Tibial:GTEx/v8/Brain_Caudate_basal_ganglia:GTEx/v8/Brain_Frontal_Cortex_BA9:GTEx/v8/Brain_Hippocampus:GTEx/v8/Brain_Putamen_basal_ganglia:GTEx/v8/Breast_Mammary_Tissue:GTEx/v8/Colon_Transverse:GTEx/v8/Esophagus_Gastroesophageal_Junction:GTEx/v8/Esophagus_Mu…	+	Yes	Promoter_anchored_loops:EP_correlation_cell_type_oneway:Adult_Cortex:Fetal_Cortex:GM12878:IMR90	3.91021e-28	rs7184567;rs11150604;rs11865499;rs11864054;rs11150596;rs8063565;rs17708638;rs4889649;rs1052352;rs7186852;rs17708638:rs1052352:rs4889649:rs7186852:rs11864054:rs8063565:rs7184567;rs11150596:rs7184567;rs11150596:rs11150604;rs11864054:rs11865499;rs8063565:rs11150604:rs7184567:rs3814883	198
ENSG00000167394	ZNF668	16	31072164	31085641	0.268892	-0.544055	44	20.3	498	3.27170000000001e-310	0	eQTLcatalogue/BLUEPRINT_ge_neutrophil:eQTLcatalogue/CEDAR_T-cell_CD4:eQTLcatalogue/Fairfax_2012_B-cell_CD19:eQTLcatalogue/Fairfax_2014_IFN24:eQTLcatalogue/Fairfax_2014_naive:eQTLcatalogue/GENCORD_ge_LCL:eQTLcatalogue/GEUVADIS_ge_LCL:eQTLcatalogue/HipSci_ge_iPSC:eQTLcatalogue/Lepik_2017_ge_blood:eQTLcatalogue/Nedelec_2016_ge_macrophage_naive:PsychENCODE_eQTLs:DICE/T_CD4_TH17:eQTLGen_cis_eQTLs:BIOS…	-	Yes	Promoter_anchored_loops:EP_correlation_cell_type_oneway:Adult_Cortex:Fetal_Cortex:GM12878:IMR90	3.91021e-28	rs11150604;rs7184567;rs11865499;rs11864054;rs7186852;rs11150596;rs8063565;rs1052352;rs17708638;rs4889649;rs3814883;rs7201780;rs2005219;rs2887799;rs4238961;rs4341759;rs8047664;rs17708638:rs1052352:rs4889649:rs7186852:rs11864054:rs8063565:rs7184567;rs11150596:rs7184567;rs11150596:rs11150604;rs11864054:rs11865499;rs8063565:rs11150604:rs7184567:rs3814883	198
ENSG00000232748	ZNF668	16	31072813	31073451	NA	-0.544055	31	17.64	314	3.36115e-42	0	BIOSQTL/BIOS_eQTL_geneLevel:GTEx/v8/Adrenal_Gland:GTEx/v8/Whole_Blood:GTEx/v8/Esophagus_Mucosa:GTEx/v8/Heart_Atrial_Appendage:GTEx/v8/Liver:GTEx/v8/Nerve_Tibial:GTEx/v8/Pancreas:GTEx/v8/Pituitary:GTEx/v8/Thyroid	-	No	NA	3.91021e-28	rs11150604;rs7184567;rs11865499;rs11864054;rs11150596;rs8063565;rs17708638;rs1052352;rs4889649;rs7186852	198
ENSG00000229809	ZNF688	16	30580667	30584055	7.08656e-05	-0.833034	2	0.903	108	4.5164e-12	0	PsychENCODE_eQTLs:eQTLGen_cis_eQTLs:BIOSQTL/BIOS_eQTL_geneLevel:GTEx/v8/Artery_Tibial	-	Yes	Promoter_anchored_loops:Adult_Cortex:Fetal_Cortex	3.91021e-28	rs7186852;rs2005219;rs7201780;rs2887799;rs4238961;rs4341759;rs11864054;rs11150604;rs7186852:rs3814883:rs8063565:rs7184567;rs11150596	198
ENSG00000156853	ZNF689	16	30613879	30635333	0.318737	-1.6843	26	7.636	232	6.2506e-64	0	eQTLcatalogue/CEDAR_T-cell_CD4:eQTLGen_cis_eQTLs:xQTLServer_eQTLs	-	No	NA	3.91021e-28	rs8063565;rs7186852;rs2230433;rs4787491;rs2887799;rs7201780;rs4341759;rs11150596;rs11864054;rs11150604;rs1052352	198
ENSG00000169957	ZNF768	16	30535325	30538142	0.579306	NA	0	0	274	3.81919e-07	1.14279e-06	eQTLGen_cis_eQTLs:GTEx/v8/Esophagus_Mucosa:GTEx/v8/Heart_Atrial_Appendage:GTEx/v8/Muscle_Skeletal:GTEx/v8/Nerve_Tibial:GTEx/v8/Prostate:GTEx/v8/Skin_Sun_Exposed_Lower_leg:GTEx/v8/Thyroid	+	Yes	Promoter_anchored_loops:Fetal_Cortex:GM12878:IMR90:Mesenchymal_Stem_Cell:Mesendoderm:Trophoblast-like_Cell:hESC	3.91021e-28	rs4341759;rs11864054;rs11150604;rs2230433;rs8063565;rs7186852;rs11150596;rs7184567;rs11865499;rs4889649;rs4787480:rs4787491:rs2005219:rs7186852:rs8063565:rs8063565;rs7186852:rs8047664	198
ENSG00000177238	TRIM72	16	31225342	31236510	0.000530648	-0.338908	7	18.74	192	6.86459e-39	1.00278e-35	eQTLcatalogue/BrainSeq_ge_brain:PsychENCODE_eQTLs:GTEx/v8/Brain_Anterior_cingulate_cortex_BA24:GTEx/v8/Brain_Caudate_basal_ganglia:GTEx/v8/Brain_Cerebellar_Hemisphere:GTEx/v8/Brain_Cerebellum:GTEx/v8/Brain_Cortex:GTEx/v8/Brain_Frontal_Cortex_BA9:GTEx/v8/Brain_Nucleus_accumbens_basal_ganglia:GTEx/v8/Brain_Putamen_basal_ganglia:GTEx/v8/Skin_Not_Sun_Exposed_Suprapubic:GTEx/v8/Skin_Sun_Exposed_Lower_…	-	Yes	GM12878:Mesendoderm:hESC	7.35377e-28	rs17708638;rs1052352;rs11150596;rs8063565;rs7184567;rs11150604;rs11865499;rs4889649;rs4889649:rs17708638	198
ENSG00000176723	ZNF843	16	31445569	31454346	NA	-1.39005	0	0	140	2.05034e-08	5.86911e-16	GTEx/v8/Adipose_Subcutaneous:GTEx/v8/Adipose_Visceral_Omentum:GTEx/v8/Brain_Cerebellum:GTEx/v8/Esophagus_Muscularis:GTEx/v8/Muscle_Skeletal:GTEx/v8/Nerve_Tibial:GTEx/v8/Pituitary:GTEx/v8/Prostate:GTEx/v8/Cells_Cultured_fibroblasts	+	Yes	Promoter_anchored_loops:Left_Ventricle:Liver:Spleen:GM12878:IMR90:Mesenchymal_Stem_Cell:Mesendoderm:Trophoblast-like_Cell:hESC	7.35377e-28	rs17708638;rs8047664;rs7184567;rs11150596;rs4889649;rs11865499;rs11150596:rs7184567:rs7184567;rs11865499:rs11150604:rs17708638:rs4889649:rs1052352	198
ENSG00000140688	C16orf58	16	31500792	31520630	1.17705e-10	-0.980067	0	0	33	8.2145e-07	0.00258959	eQTLGen_cis_eQTLs:GTEx/v8/Lung	+	Yes	Promoter_anchored_loops:Mesenchymal_Stem_Cell	9.39851e-28	rs17708638;rs11864054;rs11150604;rs7184567:rs17708638	198
ENSG00000071967	CYBRD1	2	172378757	172414643	0.351788	2.29122	0	0	145	3.3117e-62	0	PsychENCODE_eQTLs:eQTLGen_cis_eQTLs:eQTLGen_trans_eQTLs:BIOSQTL/BIOS_eQTL_geneLevel:GTEx/v8/Adipose_Subcutaneous:GTEx/v8/Whole_Blood:GTEx/v8/Artery_Tibial:GTEx/v8/Muscle_Skeletal:GTEx/v8/Spleen	+	Yes	GM12878:IMR90:Mesenchymal_Stem_Cell:Mesendoderm	1.89281e-27	rs10930502;rs3800227;rs2253310;rs11150604;rs11864054;rs7184567;rs11150596	41;97;198
ENSG00000164512	ANKRD55	5	55395507	55529186	2.43501e-07	0.294496	0	0	10	7.6564e-11	0	eQTLGen_trans_eQTLs	-	Yes	Left_Ventricle:Liver:IMR90:Mesenchymal_Stem_Cell:Mesendoderm:Trophoblast-like_Cell:hESC	1.89281e-27	rs7186852;rs11150604;rs11864054;rs7184567;rs11150596;rs9686661	77;198
ENSG00000167768	KRT1	12	53068520	53074191	0.973618	-0.237515	0	0	4	5.3532e-07	0.00470961	eQTLGen_trans_eQTLs	-	No	NA	1.89281e-27	rs7184567;rs11150604	198
ENSG00000100346	CACNA1I	22	39966758	40085742	0.999999	0.144812	0	0	34	4.4661e-10	2.10748e-05	eQTLGen_trans_eQTLs	+	No	NA	1.89281e-27	rs102275;rs11150604;rs11864054;rs7184567;rs11150596	151;198
ENSG00000052344	PRSS8	16	31142756	31147083	0.00338431	-0.481581	17	14.24	160	1.74039e-06	4.5473e-06	eQTLcatalogue/Quach_2016_ge_monocyte_IAV:GTEx/v8/Brain_Cerebellum:GTEx/v8/Colon_Sigmoid:GTEx/v8/Esophagus_Mucosa:GTEx/v8/Lung:GTEx/v8/Pituitary:GTEx/v8/Skin_Sun_Exposed_Lower_leg:GTEx/v8/Thyroid	-	Yes	Promoter_anchored_loops:Adult_Cortex	2.00896e-27	rs11865499;rs11150604;rs4889649;rs7184567;rs11150596;rs2887799;rs17708638;rs1052352;rs8063565;rs11150596:rs11150604:rs7184567	198
ENSG00000185947	ZNF267	16	31885079	31928668	NA	-0.312067	0	0	0	NA	NA	NA	NA	Yes	Promoter_anchored_loops	2.00896e-27	rs7184567;rs8063565;rs11150596:rs11150604	198
ENSG00000171840	NINJ2	12	673462	772945	0.0201389	0.878755	0	0	7	6.2026e-07	0.000680883	eQTLGen_trans_eQTLs:BIOSQTL/BIOS_eQTL_geneLevel	-	Yes	Liver:GM12878:IMR90:Mesenchymal_Stem_Cell:hESC	5.7477e-27	rs11150604;rs11611246	158;198
ENSG00000168646	AXIN2	17	63524681	63557765	0.119052	-0.429549	0	0	7	3.7823e-07	0.00339618	eQTLGen_trans_eQTLs	-	No	NA	5.7477e-27	rs7184567;rs11150596;rs11150604	198
ENSG00000178927	C17orf62	17	80400465	80408705	0.000955064	0.0100717	0	0	1	7.8293e-06	0.0476001	eQTLGen_trans_eQTLs	+	No	NA	5.7477e-27	rs11150604	198
ENSG00000089280	FUS	16	31191431	31203127	0.999964	-0.50984	11	16.87	40	1.80527e-07	0.000902635	eQTLcatalogue/Quach_2016_ge_monocyte_naive:BIOSQTL/BIOS_eQTL_geneLevel:GTEx/v8/Adipose_Subcutaneous:GTEx/v8/Nerve_Tibial	-	Yes	Promoter_anchored_loops:Adult_Cortex:Fetal_Cortex	6.2604e-27	rs17708638;rs4889649;rs1052352;rs8047664;rs7184567;rs11865499;rs11865499:rs11150604:rs7184567;rs8063565;rs11150596:rs7184567;rs11150596:rs11150604;rs11864054:rs11865499;rs8063565:rs17708638	198
ENSG00000156885	COX6A2	16	31439052	31439967	0.549091	-0.215325	0	0	39	1.97587e-05	0.0127749	BIOSQTL/BIOS_eQTL_geneLevel	-	Yes	Promoter_anchored_loops:Adult_Cortex:Fetal_Cortex:Left_Ventricle:Mesendoderm	6.26931e-27	rs17708638;rs7184567;rs11150596:rs17708638:rs1052352:rs7184567;rs11865499:rs11150604	198
ENSG00000150281	CTF1	16	30907928	30914881	0.138255	0.532031	14	9.983	17	1.33143e-06	0.00115576	GTEx/v8/Artery_Tibial:GTEx/v8/Muscle_Skeletal:GTEx/v8/Spleen	-	Yes	Promoter_anchored_loops:Adult_Cortex:Fetal_Cortex:Aorta:Dorsolateral_Prefrontal_Cortex:Hippocampus:Left_Ventricle:Liver:Spleen:GM12878:IMR90:Mesenchymal_Stem_Cell:Mesendoderm:Neural_Progenitor_Cell:Trophoblast-like_Cell:hESC	6.26931e-27	rs8063565;rs7184567;rs11150596;rs11865499;rs11150604;rs11864054;rs8047664;rs2230433;rs8063565:rs3814883:rs7186852:rs11864054:rs7184567;rs11150596:rs11150604;rs11864054:rs11865499;rs8063565:rs7184567;rs11865499:rs11150604:rs17708638:rs1052352:rs8063565;rs7186852:rs8047664:rs11150596:rs8063565	198
ENSG00000099364	FBXL19	16	30934376	30960104	0.982522	NA	36	23.1	8	5.42573e-07	0.00271287	eQTLcatalogue/Nedelec_2016_ge_macrophage_Salmonella:eQTLcatalogue/Quach_2016_ge_monocyte_LPS:BIOSQTL/BIOS_eQTL_geneLevel	-	Yes	Adult_Cortex:Fetal_Cortex:GM12878:IMR90:Mesenchymal_Stem_Cell:Mesendoderm:Trophoblast-like_Cell	6.26931e-27	rs11865499;rs8063565;rs11150604;rs11864054;rs7184567;rs11150596;rs3814883:rs7186852:rs8063565:rs11864054:rs7184567;rs11150596:rs7184567;rs11150596:rs11150604;rs11864054:rs11865499;rs8063565:rs7184567;rs11865499:rs11150604:rs17708638:rs1052352:rs8063565;rs7186852:rs8047664	198
ENSG00000140682	TGFB1I1	16	31482906	31489281	0.0749169	NA	0	0	60	1.32345e-06	9.53129e-18	eQTLcatalogue/TwinsUK_ge_LCL:BIOSQTL/BIOS_eQTL_geneLevel:GTEx/v8/Artery_Tibial	+	Yes	Promoter_anchored_loops	6.8301e-27	rs17708638;rs11865499;rs11864054:rs7184567;rs11150596:rs11865499;rs8063565:rs7184567:rs7184567;rs11865499:rs11150604	198
ENSG00000118402	ELOVL4	6	80624529	80657297	0.741051	0.380942	0	0	3	1.1251e-06	0.00898876	eQTLGen_trans_eQTLs	+	Yes	hESC	1.00571e-26	rs11150604;rs11864054;rs1507153	95;198
ENSG00000179526	SHARPIN	8	145153536	145163027	0.0198873	NA	0	0	4	1.5367e-06	0.011935	eQTLGen_trans_eQTLs	+	No	NA	1.00571e-26	rs7184567;rs11150596;rs11150604	198
ENSG00000005379	BZRAP1	17	56378592	56406152	0.0566264	-0.283683	0	0	3	1.63e-06	0.0127101	eQTLGen_trans_eQTLs	-	No	NA	1.00571e-26	rs11150604;rs11864054	198
ENSG00000126458	RRAS	19	50138549	50143458	0.287257	-0.530932	0	0	2	3.7064e-06	0.0258802	eQTLGen_trans_eQTLs	+	No	NA	1.00571e-26	rs11150604;rs11864054	198
ENSG00000196821	C6orf106	6	34555065	34664636	0.45403	-1.13555	152	15.78	548	0	0	eQTLcatalogue/BLUEPRINT_ge_monocyte:eQTLcatalogue/BLUEPRINT_ge_neutrophil:eQTLcatalogue/BLUEPRINT_ge_T-cell:eQTLcatalogue/BrainSeq_ge_brain:eQTLcatalogue/CEDAR_transverse_colon:eQTLcatalogue/Fairfax_2014_IFN24:eQTLcatalogue/Fairfax_2014_LPS24:eQTLcatalogue/Fairfax_2014_naive:eQTLcatalogue/HipSci_ge_iPSC:eQTLcatalogue/Lepik_2017_ge_blood:eQTLcatalogue/TwinsUK_ge_LCL:PsychENCODE_eQTLs:DICE/T_CD4_TF…	+	Yes	Promoter_anchored_loops:Fetal_Cortex:GM12878:IMR90:Mesenchymal_Stem_Cell	1.03148e-26	rs2814982;rs2814944;rs6457796;rs6939345;rs7742443;rs3822921;rs11754548;rs3798548;rs12525532;rs1150781;rs7742369;rs11754548:rs2814944:rs6939345:rs3822921	90
ENSG00000112039	FANCE	6	35420138	35434880	0.0031389	NA	0	0	406	7.1651e-10	6.58718e-06	eQTLGen_cis_eQTLs:GTEx/v8/Brain_Caudate_basal_ganglia	-	No	NA	1.03148e-26	rs11754548;rs3798548;rs2814944;rs6939345;rs6457796	90
ENSG00000124507	PACSIN1	6	34433916	34503006	0.991339	-1.5939	36	18.95	106	7.6746e-36	0	eQTLGen_cis_eQTLs:eQTLGen_trans_eQTLs:CMC_SVA_cis:GTEx/v8/Esophagus_Muscularis:GTEx/v8/Thyroid	+	Yes	Promoter_anchored_loops:Adult_Cortex:Fetal_Cortex:Left_Ventricle:Liver:Lung:Right_Ventricle:Spleen:GM12878:IMR90:Mesenchymal_Stem_Cell:Mesendoderm:Neural_Progenitor_Cell:Trophoblast-like_Cell:hESC	1.03148e-26	rs11754548;rs3798548;rs7742369;rs6754311;rs2814982;rs2814944;rs6939345;rs3822921;rs6457796;rs3798548:rs2814944:rs11754548:rs6939345:rs3822921:rs1150781:rs6457796:rs2814944;rs6939345:rs7742443	37;90
ENSG00000124562	SNRPC	6	34725183	34741571	0.727262	-0.35112	94	15.81	592	1.633e-262	0	eQTLcatalogue/BLUEPRINT_ge_monocyte:eQTLcatalogue/BLUEPRINT_ge_T-cell:eQTLcatalogue/BrainSeq_ge_brain:eQTLcatalogue/CEDAR_monocyte_CD14:eQTLcatalogue/CEDAR_T-cell_CD4:eQTLcatalogue/CEDAR_T-cell_CD8:eQTLcatalogue/Fairfax_2012_B-cell_CD19:eQTLcatalogue/Fairfax_2014_naive:eQTLcatalogue/HipSci_ge_iPSC:eQTLcatalogue/Kasela_2017_T-cell_CD4:eQTLcatalogue/Kasela_2017_T-cell_CD8:eQTLcatalogue/Lepik_2017_g…	-	Yes	Promoter_anchored_loops:Mesenchymal_Stem_Cell	1.03148e-26	rs6457796;rs2814944;rs6939345;rs2814982;rs3822921;rs7742443;rs7742369;rs11754548;rs3798548;rs12525532;rs6939345:rs2814944:rs3822921	90
ENSG00000124664	SPDEF	6	34505579	34524110	0.711825	-0.40704	23	10.65	81	2.75336e-06	0.000896609	eQTLcatalogue/CEDAR_transverse_colon:PsychENCODE_eQTLs:GTEx/v8/Brain_Cerebellum:GTEx/v8/Brain_Cortex:GTEx/v8/Muscle_Skeletal	-	Yes	Promoter_anchored_loops:Spleen:IMR90:Mesenchymal_Stem_Cell:Mesendoderm:hESC	1.03148e-26	rs11754548;rs3798548;rs2814944;rs2814982;rs6939345;rs1150781:rs7742369:rs11754548:rs6457796:rs2814944:rs3798548:rs3822921	90
ENSG00000124678	TCP11	6	35085848	35116387	4.00945e-05	-0.413536	5	2.993	88	9.51016e-10	6.00508e-38	eQTLcatalogue/TwinsUK_ge_skin:GTEx/v8/Adipose_Subcutaneous:GTEx/v8/Artery_Coronary:GTEx/v8/Artery_Tibial:GTEx/v8/Brain_Putamen_basal_ganglia:GTEx/v8/Breast_Mammary_Tissue:GTEx/v8/Esophagus_Mucosa:GTEx/v8/Esophagus_Muscularis:GTEx/v8/Lung:GTEx/v8/Prostate:GTEx/v8/Skin_Not_Sun_Exposed_Suprapubic:GTEx/v8/Skin_Sun_Exposed_Lower_leg:GTEx/v8/Stomach:GTEx/v8/Testis	-	No	NA	1.03148e-26	rs7742443;rs3822921;rs12525532;rs11754548;rs2814944;rs6939345	90
ENSG00000065060	UHRF1BP1	6	34759857	34850915	2.46541e-07	-0.830354	170	16.17	607	3.27167000000001e-310	0	eQTLcatalogue/BLUEPRINT_ge_monocyte:eQTLcatalogue/BLUEPRINT_ge_neutrophil:eQTLcatalogue/BLUEPRINT_ge_T-cell:eQTLcatalogue/BrainSeq_ge_brain:eQTLcatalogue/CEDAR_monocyte_CD14:eQTLcatalogue/CEDAR_T-cell_CD4:eQTLcatalogue/CEDAR_T-cell_CD8:eQTLcatalogue/CEDAR_transverse_colon:eQTLcatalogue/Fairfax_2014_IFN24:eQTLcatalogue/Fairfax_2014_LPS24:eQTLcatalogue/Fairfax_2014_LPS2:eQTLcatalogue/Fairfax_2014_n…	+	Yes	Promoter_anchored_loops:Adult_Cortex:Fetal_Cortex:GM12878:IMR90:Mesenchymal_Stem_Cell	1.03148e-26	rs6457796;rs2814944;rs6939345;rs7742443;rs2814982;rs3822921;rs11754548;rs3798548;rs12525532;rs7742369;rs1150781;rs7742369:rs6457796:rs3822921:rs6939345:rs2814944:rs7742443	90
ENSG00000135318	NT5E	6	86159809	86205500	2.33634e-06	-0.469731	0	0	2	3.535e-06	0.0248976	eQTLGen_trans_eQTLs	+	No	NA	1.07172e-26	rs11150604;rs11864054	198
ENSG00000113163	COL4A3BP	5	74664311	74807963	0.979474	-1.64811	131	14.51	411	1.14009e-19	0	eQTLcatalogue/BLUEPRINT_ge_T-cell:DICE/T_CD4_TH2:DICE/T_CD4_naive_TREG:eQTLGen_cis_eQTLs:BIOSQTL/BIOS_eQTL_geneLevel:GTEx/v8/Esophagus_Mucosa:GTEx/v8/Esophagus_Muscularis:GTEx/v8/Muscle_Skeletal:GTEx/v8/Nerve_Tibial:GTEx/v8/Cells_Cultured_fibroblasts:GTEx/v8/Thyroid	+	Yes	Promoter_anchored_loops:Adult_Cortex:Fetal_Cortex:Left_Ventricle:Liver:GM12878:IMR90:Mesenchymal_Stem_Cell:Mesendoderm:Trophoblast-like_Cell:hESC	1.20972e-26	rs34341;rs6871667;rs4512110;rs13356670;rs6453133;rs2303647;rs9942407;rs10515214;rs7710706;rs34344;rs17649350;rs2307111;rs2047059;rs888789;rs7700719;rs4301212;rs2303647:rs4512110:rs9942407:rs2047059:rs2307111;rs34341:rs13356670;rs6453133:rs17649350:rs2303647:rs6453133:rs34341;rs6871667:rs7700719:rs6453133;rs34344:rs34344;rs17649350:rs34344:rs11957690:rs7708899:rs7710706	78
ENSG00000164252	AGGF1	5	76325076	76361059	6.09963e-05	-0.704749	0	0	0	NA	NA	NA	NA	Yes	Left_Ventricle:IMR90:Mesenchymal_Stem_Cell:Mesendoderm	4.32029e-26	rs6453133:rs4512110;rs2303647:rs34341;rs6453133;rs6871667:rs13356670;rs6453133:rs7700719:rs2047059:rs2307111;rs34341:rs17649350:rs2303647	78
ENSG00000145708	CRHBP	5	76248538	76276983	0.989594	-0.435834	0	0	0	NA	NA	NA	NA	Yes	Left_Ventricle:IMR90:Mesenchymal_Stem_Cell:Mesendoderm:hESC	4.32029e-26	rs11957690:rs7708899:rs7710706:rs9942407:rs17649350:rs2303647:rs7700719:rs4301212:rs13356670;rs6453133:rs6453133:rs4512110;rs2303647:rs34341;rs6453133;rs6871667:rs2047059:rs2307111;rs34341	78
ENSG00000181104	F2R	5	76011868	76031606	0.0412385	-0.795911	0	0	0	NA	NA	NA	NA	Yes	GM12878:IMR90:Mesenchymal_Stem_Cell:Mesendoderm:hESC	4.32029e-26	rs13356670;rs6453133:rs17649350:rs2303647:rs7700719:rs11957690:rs7708899:rs7710706:rs9942407:rs6453133:rs34341;rs6871667:rs34341;rs6453133;rs6871667:rs4512110;rs2303647:rs2047059:rs2307111;rs34341	78
ENSG00000198780	FAM169A	5	74073399	74162776	0.998576	-1.16357	0	0	15	NA	0.009	CMC_SVA_cis	-	Yes	Adult_Cortex:IMR90:Mesenchymal_Stem_Cell:Mesendoderm:hESC	4.32029e-26	rs7700719;rs7710706;rs2047059:rs2307111;rs34341:rs7700719:rs11957690:rs7708899:rs7710706:rs9942407:rs13356670;rs6453133:rs17649350:rs2303647	78
ENSG00000164347	GFM2	5	74017029	74063196	1.22849e-08	0.221147	0	0	0	NA	NA	NA	NA	Yes	Aorta:Left_Ventricle:Liver:IMR90:Mesenchymal_Stem_Cell:Mesendoderm:Trophoblast-like_Cell:hESC	4.32029e-26	rs2047059:rs2307111;rs34341:rs13356670;rs6453133:rs7700719:rs6453106;rs7700719:rs11957690:rs7708899;rs11957690:rs7708899:rs7710706:rs9942407:rs6453133:rs4512110;rs2303647:rs34341;rs6453133;rs6871667:rs17649350:rs2303647	78
ENSG00000145703	IQGAP2	5	75699074	76003957	4.10295e-15	-0.157179	0	0	9	4.3109e-06	0.0123269	eQTLGen_cis_eQTLs	+	Yes	Liver:IMR90:Mesenchymal_Stem_Cell:Mesendoderm:Trophoblast-like_Cell:hESC	4.32029e-26	rs34344;rs34341;rs2307111;rs17649350:rs2303647:rs6453106;rs7700719:rs11957690:rs7708899;rs11957690:rs9942407:rs7700719:rs7708899:rs7710706:rs13356670;rs6453133:rs6453133:rs34341;rs6871667:rs34341;rs6453133;rs6871667:rs4512110;rs2303647	78
ENSG00000164346	NSA2	5	74062817	74072737	0.686235	-0.0931996	0	0	3	5.32699e-05	4.96562e-127	GTEx/v8/Thyroid	NA	Yes	Aorta:Left_Ventricle:Liver:IMR90:Mesenchymal_Stem_Cell:Mesendoderm:Trophoblast-like_Cell:hESC	4.32029e-26	rs17649350;rs2047059:rs2307111;rs34341:rs13356670;rs6453133:rs7700719:rs6453106;rs7700719:rs11957690:rs7708899;rs11957690:rs7708899:rs7710706:rs9942407:rs6453133:rs4512110;rs2303647:rs34341;rs6453133;rs6871667:rs17649350:rs2303647	78
ENSG00000145700	ANKRD31	5	74364100	74532703	NA	NA	284	15.63	623	1.53145e-24	1.13216e-21	PsychENCODE_eQTLs:eQTLGen_cis_eQTLs:BIOSQTL/BIOS_eQTL_geneLevel:CMC_SVA_cis:CMC_NoSVA_cis:GTEx/v8/Cells_Cultured_fibroblasts:GTEx/v8/Testis	+	Yes	Adult_Cortex:Left_Ventricle	4.3612e-26	rs9942407;rs4301212;rs7700719;rs6453106;rs11957690;rs7710706;rs7708899;rs6871667;rs34341;rs13356670;rs6453133;rs4512110;rs2303647;rs34344;rs2307111;rs17649350;rs2047059;rs10515214;rs888789;rs258496;rs6453133:rs17649350:rs2303647	78
ENSG00000254206	NPIPB11	16	29392675	29415350	NA	NA	0	0	93	3.5034e-16	0	eQTLcatalogue/CEDAR_neutrophil_CD15:eQTLcatalogue/Fairfax_2014_naive:eQTLGen_cis_eQTLs:GTEx/v8/Adipose_Visceral_Omentum:GTEx/v8/Whole_Blood:GTEx/v8/Artery_Aorta:GTEx/v8/Nerve_Tibial	+	No	NA	4.37816e-26	rs2887799;rs7201780;rs3814883;rs2005219;rs4238961	198
ENSG00000137656	BUD13	11	116618886	116643704	0.00229543	NA	51	14.87	330	3.2331e-74	0	eQTLcatalogue/Fairfax_2014_LPS24:eQTLcatalogue/Fairfax_2014_naive:eQTLGen_cis_eQTLs:BIOSQTL/BIOS_eQTL_geneLevel:BRAINEAC/FCTX:BRAINEAC/aveALL:GTEx/v8/Whole_Blood:GTEx/v8/Artery_Coronary	+	Yes	Adult_Cortex:Fetal_Cortex:Aorta:Hippocampus:Left_Ventricle:Liver:Pancreas:Right_Ventricle:Spleen:GM12878:IMR90:Mesenchymal_Stem_Cell:Mesendoderm:Trophoblast-like_Cell:hESC	6.06856e-26	rs664059;rs180360;rs619054;rs10892019;rs10488698;rs180326;rs1263056;rs7117145;rs17119878;rs11826999;rs2000571;rs2846012;rs11601584;rs10892063;rs10047459;rs10892063:rs6589574:rs664059:rs2000571:rs180360;rs10892019:rs10488698:rs180326	155
ENSG00000160613	PCSK7	11	117075053	117103241	0.19137	NA	9	4.526	370	3.27170000000001e-310	0	eQTLcatalogue/CEDAR_monocyte_CD14:eQTLcatalogue/CEDAR_T-cell_CD4:eQTLcatalogue/CEDAR_T-cell_CD8:eQTLcatalogue/Fairfax_2014_IFN24:eQTLcatalogue/Fairfax_2014_LPS24:eQTLcatalogue/Fairfax_2014_LPS2:eQTLcatalogue/Lepik_2017_ge_blood:eQTLcatalogue/Quach_2016_ge_monocyte_naive:eQTLcatalogue/Quach_2016_ge_monocyte_Pam3CSK4:eQTLcatalogue/Quach_2016_ge_monocyte_R848:eQTLcatalogue/TwinsUK_ge_skin:PsychENCOD…	+	Yes	EP_correlation_cell_type_oneway:Liver:Spleen:IMR90:Mesenchymal_Stem_Cell:Mesendoderm:Trophoblast-like_Cell:hESC	6.06856e-26	rs10047459;rs6589574;rs10892063;rs480823;rs11826999;rs2000571;rs2846012;rs1263056;rs11601584;rs10892019;rs664059;rs180360;rs619054;rs180326;rs5110;rs10892063:rs6589574:rs664059:rs10488698:rs619054:rs2000571:rs180360;rs10892019:rs180326	155
ENSG00000149577	SIDT2	11	117049449	117068160	0.0025724	-0.315318	12	7.83	430	3.27170000000001e-310	0	eQTLcatalogue/BLUEPRINT_ge_monocyte:eQTLcatalogue/BLUEPRINT_ge_T-cell:eQTLcatalogue/CEDAR_monocyte_CD14:eQTLcatalogue/CEDAR_T-cell_CD4:eQTLcatalogue/Fairfax_2012_B-cell_CD19:eQTLcatalogue/Fairfax_2014_IFN24:eQTLcatalogue/Fairfax_2014_LPS24:eQTLcatalogue/Fairfax_2014_LPS2:eQTLcatalogue/Fairfax_2014_naive:eQTLcatalogue/GENCORD_ge_LCL:eQTLcatalogue/Kasela_2017_T-cell_CD4:eQTLcatalogue/Kasela_2017_T-…	-	Yes	Promoter_anchored_loops:Adult_Cortex:Fetal_Cortex:Left_Ventricle:Liver:Spleen:GM12878:IMR90:Mesenchymal_Stem_Cell:Mesendoderm:Trophoblast-like_Cell:hESC	6.06856e-26	rs10892063;rs6589574;rs10047459;rs2000571;rs11826999;rs664059;rs1263056;rs480823;rs17119878;rs2846012;rs11601584;rs10892019;rs180360;rs619054;rs10488698;rs180326;rs5110;rs6589574:rs664059:rs10488698:rs10892063:rs619054:rs2000571:rs180360;rs10892019:rs180326	155
ENSG00000149591	TAGLN	11	117070037	117075498	0.241538	-0.64579	5	6.935	404	3.27167000000001e-310	0	eQTLcatalogue/BLUEPRINT_ge_monocyte:eQTLcatalogue/BLUEPRINT_ge_neutrophil:eQTLcatalogue/BLUEPRINT_ge_T-cell:eQTLcatalogue/CEDAR_B-cell_CD19:eQTLcatalogue/CEDAR_monocyte_CD14:eQTLcatalogue/Fairfax_2012_B-cell_CD19:eQTLcatalogue/Fairfax_2014_IFN24:eQTLcatalogue/Fairfax_2014_LPS24:eQTLcatalogue/Fairfax_2014_LPS2:eQTLcatalogue/Fairfax_2014_naive:eQTLcatalogue/GENCORD_ge_LCL:eQTLcatalogue/GENCORD_ge_T…	+	Yes	Promoter_anchored_loops:Adult_Cortex:Left_Ventricle:Liver:Spleen:GM12878:IMR90:Mesenchymal_Stem_Cell:Mesendoderm:Trophoblast-like_Cell:hESC	6.06856e-26	rs6589574;rs10047459;rs2000571;rs11826999;rs664059;rs1263056;rs10892063;rs180326;rs619054;rs11601584;rs480823;rs2846012;rs17119878;rs10892019;rs180360;rs10488698;rs5110;rs664059:rs10488698:rs6589574:rs10892063:rs619054:rs2000571:rs180360;rs10892019:rs180326	155
ENSG00000109917	ZNF259	11	116648436	116658766	0.0193035	0.00239464	21	13.99	110	7.30454e-13	2.00639e-08	PsychENCODE_eQTLs:eQTLGen_cis_eQTLs:BIOSQTL/BIOS_eQTL_geneLevel:CMC_SVA_cis:GTEx/v8/Adipose_Subcutaneous:GTEx/v8/Whole_Blood:GTEx/v8/Brain_Anterior_cingulate_cortex_BA24:GTEx/v8/Brain_Caudate_basal_ganglia:GTEx/v8/Brain_Cerebellar_Hemisphere:GTEx/v8/Brain_Cerebellum:GTEx/v8/Brain_Cortex:GTEx/v8/Brain_Hippocampus:GTEx/v8/Brain_Nucleus_accumbens_basal_ganglia:GTEx/v8/Brain_Putamen_basal_ganglia:GTE…	-	Yes	EP_links_oneway:Promoter_anchored_loops:Adult_Cortex:Fetal_Cortex:Aorta:Hippocampus:Left_Ventricle:Liver:Pancreas:Right_Ventricle:Spleen:GM12878:IMR90:Mesenchymal_Stem_Cell:Mesendoderm:Trophoblast-like_Cell:hESC	6.06856e-26	rs10488698;rs664059;rs1263056;rs619054;rs17119878;rs11826999;rs2000571;rs180360;rs2846012;rs10892019;rs10892063;rs180326;rs6589574:rs10892063:rs664059:rs2000571:rs180360;rs10892019:rs10488698:rs180326	155
ENSG00000180425	C11orf71	11	114262165	114271139	0.00842482	-0.124749	0	0	0	NA	NA	NA	NA	Yes	Left_Ventricle:IMR90:Mesenchymal_Stem_Cell	7.23921e-26	rs6589574:rs10892063:rs480823:rs7117145:rs2846012:rs17119878:rs11826999:rs11826999;rs17119878;rs2000571:rs11826999;rs2000571:rs1263056:rs10488698;rs7117145:rs11601584:rs10892019;rs2846012:rs2000571;rs11601584:rs10892019:rs2000571:rs10488698:rs180360;rs619054;rs10892019:rs180360:rs664059:rs180326:rs619054	155
ENSG00000182985	CADM1	11	115039938	115375675	0.994386	-1.27628	0	0	0	NA	NA	NA	NA	Yes	Fetal_Cortex:Left_Ventricle:IMR90:Mesenchymal_Stem_Cell:Trophoblast-like_Cell	7.23921e-26	rs480823:rs7117145:rs2846012:rs17119878:rs11826999:rs11826999;rs17119878;rs2000571:rs11826999;rs2000571	155
ENSG00000076053	RBM7	11	114270752	114284925	0.769935	-0.240423	0	0	0	NA	NA	NA	NA	Yes	Left_Ventricle:IMR90:Mesenchymal_Stem_Cell	7.23921e-26	rs6589574:rs10892063:rs480823:rs7117145:rs2846012:rs17119878:rs11826999:rs11826999;rs17119878;rs2000571:rs11826999;rs2000571:rs1263056:rs10488698;rs7117145:rs11601584:rs10892019;rs2846012:rs2000571;rs11601584:rs10892019:rs2000571:rs10488698:rs180360;rs619054;rs10892019:rs180360:rs664059:rs180326:rs619054	155
ENSG00000255663	RP11-212D19.4	11	114271404	114314654	NA	NA	0	0	0	NA	NA	NA	NA	Yes	Left_Ventricle:IMR90:Mesenchymal_Stem_Cell	7.23921e-26	rs6589574:rs10892063:rs480823:rs7117145:rs2846012:rs17119878:rs11826999:rs11826999;rs17119878;rs2000571:rs11826999;rs2000571:rs1263056:rs10488698;rs7117145:rs11601584:rs10892019;rs2846012:rs2000571;rs11601584:rs10892019:rs2000571:rs10488698:rs180360;rs619054;rs10892019:rs180360:rs664059:rs180326:rs619054	155
ENSG00000109906	ZBTB16	11	113930315	114121398	0.980087	NA	0	0	0	NA	NA	NA	NA	Yes	IMR90:Mesenchymal_Stem_Cell	7.23921e-26	rs480823:rs7117145:rs2846012:rs17119878:rs11826999:rs11826999;rs17119878;rs2000571:rs11826999;rs2000571:rs664059:rs2000571:rs180360;rs619054;rs10892019:rs10488698:rs180326	155
ENSG00000008196	TFAP2B	6	50786436	50815326	0.990904	0.192212	38	19.87	157	1.22489e-09	2.84433e-06	GTEx/v8/Colon_Sigmoid:GTEx/v8/Nerve_Tibial:GTEx/v8/Skin_Sun_Exposed_Lower_leg:GTEx/v8/Testis	-	Yes	Fetal_Cortex:Liver:IMR90:Mesenchymal_Stem_Cell:Mesendoderm:Neural_Progenitor_Cell:Trophoblast-like_Cell:hESC	7.81375e-26	rs9473932;rs9395633;rs12528998;rs987237;rs2635727;rs4082052;rs17540418;rs12527048:rs9382044:rs6907923;rs9382044:rs4082052	93;94
ENSG00000186635	ARAP1	11	72396114	72504644	1.50378e-05	-0.377897	0	0	1	5.2535e-06	0.0343422	eQTLGen_trans_eQTLs	+	No	NA	7.81375e-26	rs987237	93
ENSG00000186184	POLR1D	13	28194903	28241548	0.257869	NA	0	0	1	8.1502e-06	0.0492291	eQTLGen_trans_eQTLs	-	No	NA	7.81375e-26	rs987237	93
ENSG00000151806	GUF1	4	44680444	44702943	2.3678e-11	0.593355	0	0	6	2.5486e-06	0.00738003	eQTLGen_cis_eQTLs	-	No	NA	8.14195e-26	rs10938397	70
ENSG00000064999	ANKS1A	6	34857042	35059179	0.84686	0.260683	22	14.05	91	6.3682e-17	0	eQTLcatalogue/Fairfax_2014_IFN24:eQTLcatalogue/Fairfax_2014_LPS24:eQTLcatalogue/Fairfax_2014_LPS2:PsychENCODE_eQTLs:eQTLGen_cis_eQTLs:xQTLServer_eQTLs:CMC_SVA_cis:CMC_NoSVA_cis:GTEx/v8/Adipose_Subcutaneous:GTEx/v8/Artery_Aorta:GTEx/v8/Brain_Cortex:GTEx/v8/Brain_Frontal_Cortex_BA9	-	Yes	Promoter_anchored_loops:Fetal_Cortex:Left_Ventricle:Liver:Right_Ventricle:GM12878:IMR90:Mesenchymal_Stem_Cell:Mesendoderm:Trophoblast-like_Cell:hESC	8.4838e-26	rs7742443;rs12525532;rs3822921;rs6457796;rs6939345;rs2814982;rs2814944;rs6457796:rs2814944;rs6939345:rs3822921:rs7742443:rs2814944:rs6939345:rs11754548:rs3798548:rs12525532:rs1150781	90
ENSG00000161904	LEMD2	6	33738979	33756913	0.302373	0.39292	0	0	0	NA	NA	NA	NA	Yes	Promoter_anchored_loops:IMR90:Mesenchymal_Stem_Cell	8.4838e-26	rs6457796:rs2814944;rs6939345:rs2814944	90
ENSG00000272325	NUDT3	6	34247456	34360451	0.876817	0.134938	5	5.305	27	4.36165e-08	4.49141e-16	eQTLcatalogue/BLUEPRINT_ge_T-cell:GTEx/v8/Adipose_Subcutaneous:GTEx/v8/Muscle_Skeletal:GTEx/v8/Cells_Cultured_fibroblasts:GTEx/v8/Skin_Sun_Exposed_Lower_leg	+	Yes	Promoter_anchored_loops:Adult_Cortex:Fetal_Cortex:Left_Ventricle:Liver:Spleen:GM12878:IMR90:Mesenchymal_Stem_Cell:Mesendoderm:Trophoblast-like_Cell:hESC	8.4838e-26	rs7742369;rs1150781;rs7742443;rs1150781:rs7742369:rs11754548:rs6457796:rs2814944:rs6939345:rs2814944;rs6939345:rs3822921:rs3798548:rs12525532:rs7742443	90
ENSG00000146197	SCUBE3	6	35182190	35220856	0.999984	-0.692415	1	13	23	9.04974e-06	5.07429e-26	GTEx/v8/Cells_Cultured_fibroblasts	-	Yes	Promoter_anchored_loops:Adult_Cortex:Fetal_Cortex:Left_Ventricle:Liver:IMR90:Mesenchymal_Stem_Cell:Mesendoderm:Trophoblast-like_Cell:hESC	8.4838e-26	rs3822921;rs6457796;rs7742443;rs12525532;rs2814944;rs6939345:rs6457796:rs1150781:rs7742369:rs11754548:rs12525532:rs7742443:rs2814944:rs6939345:rs3798548:rs3822921	90
ENSG00000064995	TAF11	6	34845555	34855866	0.875432	-0.232569	0	0	325	6.0021e-07	2.38801e-10	eQTLcatalogue/BLUEPRINT_ge_monocyte:eQTLcatalogue/Quach_2016_ge_monocyte_IAV:BIOSQTL/BIOS_eQTL_geneLevel:GTEx/v8/Muscle_Skeletal:GTEx/v8/Nerve_Tibial:GTEx/v8/Thyroid	+	Yes	Promoter_anchored_loops:Fetal_Cortex:Left_Ventricle:Liver:Right_Ventricle:GM12878:IMR90:Mesenchymal_Stem_Cell:Mesendoderm:Trophoblast-like_Cell:hESC	8.4838e-26	rs6457796;rs6939345;rs2814944;rs1150781;rs12525532;rs7742443;rs6457796:rs2814944;rs6939345:rs3822921:rs7742443:rs2814944:rs6939345:rs11754548:rs3798548:rs12525532:rs1150781	90
ENSG00000092199	HNRNPC	14	21677295	21737653	0.985848	-0.920276	0	0	354	0	0	xQTLServer_eQTLs	NA	No	NA	8.4838e-26	rs6457796;rs6939345;rs2814944	90
ENSG00000244274	DBNDD2	20	44034697	44039250	0.0506089	-0.14216	0	0	3	3.0474e-06	0.021854	eQTLGen_trans_eQTLs	-	No	NA	1.81464e-25	rs2814944	90
ENSG00000137392	CLPS	6	35762759	35765088	0.0562748	0.768245	0	0	2	0.000530555	0.0346904	PsychENCODE_eQTLs	-	Yes	Adult_Cortex	3.56433e-25	rs2814944;rs6939345;rs6457796	90
ENSG00000156011	PSD3	8	18384811	18942240	0.851706	1.35431	0	0	1	6.74437e-06	0.000710978	GTEx/v8/Brain_Substantia_nigra	+	No	NA	5.81505e-25	rs894210	121
ENSG00000213057	C1orf220	1	178511887	178518024	NA	NA	0	0	54	1.2639e-07	0.000426306	eQTLGen_cis_eQTLs	-	Yes	Mesenchymal_Stem_Cell:Mesendoderm	7.97405e-25	rs12135579;rs4081366;rs1854288;rs12760319;rs545608;rs8030	21
ENSG00000184909	C1ORF220	1	178511950	178517579	NA	NA	0	0	0	NA	NA	NA	NA	Yes	Mesenchymal_Stem_Cell:Mesendoderm	7.97405e-25	rs8030	21
ENSG00000116218	NPHS2	1	179519674	179545087	0.00896414	0.52971	0	0	0	NA	NA	NA	NA	Yes	IMR90:Mesenchymal_Stem_Cell	7.97405e-25	rs8030:rs12135579:rs4081366:rs1854288:rs12760319	21
ENSG00000162782	TDRD5	1	179560748	179660407	0.975819	-0.680997	0	0	0	NA	NA	NA	NA	Yes	IMR90:Mesenchymal_Stem_Cell	7.97405e-25	rs8030:rs12135579:rs4081366:rs1854288:rs12760319	21
ENSG00000151353	TMEM18	2	667335	677439	0.0536351	-0.434029	24	10.47	191	3.14274e-16	0	eQTLcatalogue/BLUEPRINT_ge_monocyte:eQTLcatalogue/Fairfax_2014_naive:eQTLcatalogue/TwinsUK_ge_fat:eQTLGen_cis_eQTLs:BIOSQTL/BIOS_eQTL_geneLevel:CMC_SVA_cis:GTEx/v8/Adipose_Subcutaneous:GTEx/v8/Adipose_Visceral_Omentum:GTEx/v8/Artery_Aorta:GTEx/v8/Artery_Tibial:GTEx/v8/Esophagus_Mucosa:GTEx/v8/Esophagus_Muscularis:GTEx/v8/Heart_Atrial_Appendage:GTEx/v8/Heart_Left_Ventricle:GTEx/v8/Muscle_Skeletal:…	+	No	NA	7.06664e-24	rs1317005;rs13029479;rs12999373;rs10185713;rs12996547;rs10188118;rs10209658;rs4611674;rs7571872	26
ENSG00000176697	BDNF	11	27676440	27743605	0.946719	0.108206	66	22.5	32	5.34778e-06	0.00241281	eQTLcatalogue/HipSci_ge_iPSC:PsychENCODE_eQTLs:GTEx/v8/Heart_Left_Ventricle:GTEx/v8/Thyroid	+	Yes	Adult_Cortex:Fetal_Cortex:Left_Ventricle:IMR90:Mesenchymal_Stem_Cell:Mesendoderm:Neural_Progenitor_Cell:Trophoblast-like_Cell:hESC	1.33998e-23	rs6265;rs4923456;rs11030086;rs1013402;rs6484314;rs12288512;rs10501086;rs17309825;rs11030086:rs6265;rs11030086:rs11030086:rs17309825:rs1013402:rs6265:rs1222220:rs6484478:rs6484314:rs4923456:rs2065418:rs564832:rs1013402	147;148
ENSG00000148943	LIN7C	11	27516123	27528320	0.0300652	-0.643347	26	9.721	207	5.619e-42	0	eQTLcatalogue/Lepik_2017_ge_blood:eQTLcatalogue/Quach_2016_ge_monocyte_naive:eQTLcatalogue/TwinsUK_ge_fat:eQTLcatalogue/TwinsUK_ge_LCL:PsychENCODE_eQTLs:eQTLGen_cis_eQTLs:BIOSQTL/BIOS_eQTL_geneLevel:GTEx/v8/Adipose_Subcutaneous:GTEx/v8/Adipose_Visceral_Omentum:GTEx/v8/Artery_Aorta:GTEx/v8/Artery_Tibial:GTEx/v8/Breast_Mammary_Tissue:GTEx/v8/Colon_Sigmoid:GTEx/v8/Colon_Transverse:GTEx/v8/Esophagus_…	+	Yes	Spleen:IMR90:Mesenchymal_Stem_Cell:Mesendoderm:Trophoblast-like_Cell:hESC	1.33998e-23	rs4923456;rs6484314;rs11030026;rs17309825;rs10501086;rs4514364;rs1013402;rs12288512;rs12807253;rs6265;rs11030086;rs4923456:rs6484314:rs6265;rs11030086:rs11030086:rs17309825:rs1013402:rs6265:rs1013402;rs12288512:rs6265;rs11030086:rs1222220:rs6484478:rs2065418:rs564832	147;148
ENSG00000152219	ARL14EP	11	30344598	30359774	0.151697	-0.308298	36	11.51	205	1.21958e-91	0	eQTLcatalogue/Alasoo_2018_ge_macrophage_IFNg_Salmonella:eQTLcatalogue/Alasoo_2018_ge_macrophage_IFNg:eQTLcatalogue/Alasoo_2018_ge_macrophage_Salmonella:eQTLcatalogue/BLUEPRINT_ge_T-cell:eQTLcatalogue/BrainSeq_ge_brain:eQTLcatalogue/CEDAR_T-cell_CD4:eQTLcatalogue/CEDAR_T-cell_CD8:eQTLcatalogue/Fairfax_2012_B-cell_CD19:eQTLcatalogue/Fairfax_2014_IFN24:eQTLcatalogue/Fairfax_2014_LPS24:eQTLcatalogue/…	-	Yes	Left_Ventricle:Liver:GM12878:IMR90:Mesenchymal_Stem_Cell:Mesendoderm:Neural_Progenitor_Cell:Trophoblast-like_Cell:hESC	1.90055e-23	rs1222220;rs6484478;rs564832;rs2065418;rs6265;rs4923456;rs11030086:rs11030086:rs17309825:rs1013402:rs6265:rs1013402;rs6484314;rs12288512:rs6265;rs11030086:rs6484478:rs4923456:rs6484314:rs2065418:rs564832:rs11030026:rs4514364:rs12807253:rs6484314;rs4514364	147;148
ENSG00000182255	KCNA4	11	30031288	30038570	0.946234	-1.24615	0	0	68	7.09805e-08	0.000172695	GTEx/v8/Brain_Cerebellar_Hemisphere:GTEx/v8/Brain_Cerebellum	-	Yes	Left_Ventricle:IMR90:Mesenchymal_Stem_Cell:Mesendoderm:Neural_Progenitor_Cell:Trophoblast-like_Cell:hESC	1.90055e-23	rs6484478;rs2065418;rs4514364:rs12807253:rs6484314;rs4514364:rs6484314:rs4923456:rs6265;rs4923456;rs11030086:rs11030086:rs17309825:rs1013402:rs6265:rs2065418:rs564832:rs1222220:rs6484478:rs1013402;rs6484314;rs12288512:rs6265;rs11030086	147;148
ENSG00000121621	KIF18A	11	28042167	28129855	0.149441	-0.472005	0	0	0	NA	NA	NA	NA	Yes	Aorta:Left_Ventricle:IMR90:Mesenchymal_Stem_Cell:Mesendoderm:Neural_Progenitor_Cell:hESC	1.90055e-23	rs6265;rs11030086:rs1222220:rs6484478:rs6265;rs4923456;rs11030086:rs11030086:rs17309825:rs1013402:rs6265:rs1013402;rs6484314;rs12288512	147;148
ENSG00000169519	METTL15	11	28129795	28355054	0.000155431	-1.29305	0	0	8	0.000110393	2.59562e-06	GTEx/v8/Spleen	+	Yes	Aorta:Left_Ventricle:IMR90:Mesenchymal_Stem_Cell:Mesendoderm:Neural_Progenitor_Cell:hESC	1.90055e-23	rs6265;rs4923456;rs11030086;rs11030086:rs1222220:rs6484478:rs6265;rs11030086:rs11030086:rs17309825:rs1013402:rs6265:rs1013402;rs6484314;rs12288512	147;148
ENSG00000124614	RPS10	6	34385231	34393902	0.946463	0.204718	0	0	403	7.16142e-17	0	eQTLcatalogue/CEDAR_transverse_colon:eQTLGen_cis_eQTLs:BIOSQTL/BIOS_eQTL_geneLevel:CMC_SVA_cis:CMC_NoSVA_cis:GTEx/v8/Adipose_Subcutaneous:GTEx/v8/Adipose_Visceral_Omentum:GTEx/v8/Artery_Aorta:GTEx/v8/Artery_Tibial:GTEx/v8/Breast_Mammary_Tissue:GTEx/v8/Esophagus_Mucosa:GTEx/v8/Esophagus_Muscularis:GTEx/v8/Muscle_Skeletal:GTEx/v8/Nerve_Tibial:GTEx/v8/Pancreas:GTEx/v8/Cells_Cultured_fibroblasts:GTEx…	+	Yes	Promoter_anchored_loops:Left_Ventricle:IMR90:Mesenchymal_Stem_Cell:Mesendoderm:Trophoblast-like_Cell:hESC	5.59651e-23	rs7742369;rs1150781;rs3822921;rs6457796;rs6939345;rs2814944;rs11754548;rs7742369:rs1150781:rs2814944:rs3822921	90
ENSG00000065029	ZNF76	6	35226686	35263762	5.07289e-16	0.397539	1	0.016	23	1.5337e-13	0	eQTLGen_cis_eQTLs:BIOSQTL/BIOS_eQTL_geneLevel:GTEx/v8/Muscle_Skeletal:GTEx/v8/Skin_Not_Sun_Exposed_Suprapubic	-	Yes	Promoter_anchored_loops:IMR90:Mesenchymal_Stem_Cell	6.84456e-23	rs7742443;rs12525532;rs7742369;rs2814944;rs6939345:rs6457796:rs7742443:rs3822921:rs2814944	90
ENSG00000077063	CTTNBP2	7	117350705	117514193	2.59916e-06	-0.293653	0	0	1	5.8262e-06	0.0374408	eQTLGen_trans_eQTLs	-	No	NA	6.942e-23	rs1013402	147
ENSG00000066382	MPPED2	11	30406040	30608419	0.970565	0.0216018	43	16.99	116	0	0	PsychENCODE_eQTLs:eQTLGen_cis_eQTLs:xQTLServer_eQTLs:CMC_SVA_cis	-	Yes	Aorta:Left_Ventricle:Liver:Right_Ventricle:IMR90:Mesenchymal_Stem_Cell:Mesendoderm:Neural_Progenitor_Cell:Trophoblast-like_Cell:hESC	7.5332e-23	rs564832;rs2065418;rs1222220;rs1222220:rs6484478:rs2065418:rs564832:rs6265;rs4923456;rs11030086:rs11030086:rs17309825:rs1013402:rs6265:rs6265;rs11030086:rs6484314:rs4923456	147;148
ENSG00000023892	DEF6	6	35265595	35289548	0.976824	0.153811	0	0	80	1.1458e-55	0	DICE/Monocyte_classical:eQTLGen_cis_eQTLs:BIOSQTL/BIOS_eQTL_geneLevel:GTEx/v8/Whole_Blood	-	Yes	Promoter_anchored_loops	1.17906e-22	rs3822921;rs11754548;rs2814982;rs6939345;rs6457796;rs7742443;rs2814944;rs12525532	90
ENSG00000145020	AMT	3	49454211	49460186	0.000569475	-0.0226371	12	13.86	658	4.7043e-285	0	eQTLcatalogue/Fairfax_2012_B-cell_CD19:eQTLcatalogue/Fairfax_2014_naive:PsychENCODE_eQTLs:DICE/B_cell_naive:DICE/T_CD8_naive:DICE/Monocyte_classical:DICE/Monocyte_non_classical:DICE/NK:DICE/T_CD4_TFH:DICE/T_CD4_TH1_17:DICE/T_CD4_TH2:DICE/T_CD4_memory_TREG:DICE/T_CD4_naive_TREG:eQTLGen_cis_eQTLs:BIOSQTL/BIOS_eQTL_geneLevel:GTEx/v8/Adipose_Subcutaneous:GTEx/v8/Adipose_Visceral_Omentum:GTEx/v8/Whole…	+	Yes	Promoter_anchored_loops:Adult_Cortex:Fetal_Cortex	5.97774e-22	rs11720264;rs12631248;rs4768;rs13100903;rs7648987;rs6446298;rs2526754;rs11712056;rs2014830;rs2624847;rs2188151;rs2280405;rs11720264:rs12631248:rs7648987:rs2526754:rs2188151:rs11712056:rs4768:rs2526754	54
ENSG00000164062	APEH	3	49711435	49721396	0.0132157	-0.271805	15	19.76	554	2.1618e-184	0	eQTLcatalogue/Fairfax_2012_B-cell_CD19:eQTLcatalogue/Fairfax_2014_LPS24:eQTLcatalogue/Fairfax_2014_naive:eQTLcatalogue/Lepik_2017_ge_blood:eQTLGen_cis_eQTLs:BIOSQTL/BIOS_eQTL_geneLevel:GTEx/v8/Adipose_Subcutaneous:GTEx/v8/Adipose_Visceral_Omentum:GTEx/v8/Artery_Aorta:GTEx/v8/Artery_Coronary:GTEx/v8/Artery_Tibial:GTEx/v8/Breast_Mammary_Tissue:GTEx/v8/Esophagus_Mucosa:GTEx/v8/Esophagus_Muscularis:G…	-	Yes	Left_Ventricle:Liver:Spleen:IMR90:Mesenchymal_Stem_Cell:Mesendoderm:Trophoblast-like_Cell:hESC	5.97774e-22	rs11720264;rs12631248;rs7648987;rs4768;rs2280405;rs2526754;rs11712056;rs2014830;rs6446298;rs2624847;rs13100903;rs2188151;rs12631248:rs11720264	54
ENSG00000007402	CACNA2D2	3	50400233	50541675	0.999693	NA	4	4.131	215	2.8745e-10	0	eQTLGen_cis_eQTLs:GTEx/v8/Liver:GTEx/v8/Pancreas:GTEx/v8/Thyroid	-	Yes	Promoter_anchored_loops:Fetal_Cortex	5.97774e-22	rs12631248;rs13100903;rs2188151;rs11712056;rs2526754;rs7648987;rs12631248:rs2188151:rs11712056	54
ENSG00000164076	CAMKV	3	49895421	49907655	0.996846	-0.638323	32	18.51	534	1.65033e-18	1.46639e-13	eQTLcatalogue/CEDAR_ileum:eQTLcatalogue/HipSci_ge_iPSC:PsychENCODE_eQTLs:BRAINEAC/FCTX:BRAINEAC/aveALL:GTEx/v8/Brain_Cortex:GTEx/v8/Small_Intestine_Terminal_Ileum:GTEx/v8/Stomach:GTEx/v8/Testis	+	Yes	Promoter_anchored_loops:Adult_Cortex:Fetal_Cortex:Spleen:IMR90:Mesenchymal_Stem_Cell	5.97774e-22	rs7648987;rs4768;rs2280405;rs12631248;rs2526754;rs11712056;rs2188151;rs6446298;rs13100903;rs2014830;rs2624847;rs11712056:rs2526754;rs11712056:rs12631248:rs7648987:rs4768:rs2526754:rs2188151:rs11712056:rs11720264	54
ENSG00000173421	CCDC36	3	49235861	49295537	0.509349	-0.452713	1	2.087	416	5.42579e-29	1.27126e-36	eQTLcatalogue/TwinsUK_ge_fat:GTEx/v8/Adipose_Subcutaneous:GTEx/v8/Adipose_Visceral_Omentum:GTEx/v8/Artery_Aorta:GTEx/v8/Artery_Coronary:GTEx/v8/Artery_Tibial:GTEx/v8/Colon_Sigmoid:GTEx/v8/Colon_Transverse:GTEx/v8/Esophagus_Gastroesophageal_Junction:GTEx/v8/Esophagus_Mucosa:GTEx/v8/Esophagus_Muscularis:GTEx/v8/Heart_Atrial_Appendage:GTEx/v8/Heart_Left_Ventricle:GTEx/v8/Lung:GTEx/v8/Muscle_Skeletal…	+	Yes	Promoter_anchored_loops	5.97774e-22	rs11720264;rs4768;rs2526754;rs7648987;rs11712056;rs2624847;rs12631248;rs13100903;rs11712056:rs2526754;rs11712056:rs2188151:rs2526754:rs12631248	54
ENSG00000187492	CDHR4	3	49828165	49837268	0.0134739	0.0436097	27	12.38	613	1.37251e-78	3.60667e-66	eQTLcatalogue/Quach_2016_ge_monocyte_IAV:eQTLcatalogue/TwinsUK_ge_skin:GTEx/v8/Artery_Aorta:GTEx/v8/Artery_Tibial:GTEx/v8/Colon_Sigmoid:GTEx/v8/Esophagus_Mucosa:GTEx/v8/Skin_Not_Sun_Exposed_Suprapubic:GTEx/v8/Skin_Sun_Exposed_Lower_leg:GTEx/v8/Testis:GTEx/v8/Thyroid	+	No	NA	5.97774e-22	rs7648987;rs4768;rs12631248;rs6446298;rs11720264;rs2624847;rs2526754;rs11712056;rs2188151;rs13100903;rs2280405;rs2014830	54
ENSG00000228008	CTD-2330K9.3	3	49941278	49954370	NA	NA	32	15.79	485	6.92195e-11	2.36031e-07	GTEx/v8/Artery_Aorta:GTEx/v8/Colon_Sigmoid:GTEx/v8/Colon_Transverse:GTEx/v8/Esophagus_Muscularis:GTEx/v8/Lung:GTEx/v8/Pituitary:GTEx/v8/Small_Intestine_Terminal_Ileum:GTEx/v8/Stomach:GTEx/v8/Testis:GTEx/v8/Thyroid	+	Yes	Promoter_anchored_loops	5.97774e-22	rs2526754;rs7648987;rs11712056;rs12631248;rs6446298;rs4768;rs2280405;rs13100903;rs2014830;rs2624847;rs2188151;rs7648987:rs2526754;rs11712056:rs12631248:rs2188151	54
ENSG00000088538	DOCK3	3	50712672	51421629	1	-0.836765	12	13.42	403	2.66215e-11	1.06288e-80	eQTLcatalogue/TwinsUK_ge_fat:DICE/T_CD8_naive:DICE/T_CD4_memory_TREG:DICE/T_CD4_naive_TREG:GTEx/v8/Adipose_Subcutaneous:GTEx/v8/Lung:GTEx/v8/Muscle_Skeletal:GTEx/v8/Nerve_Tibial:GTEx/v8/Skin_Not_Sun_Exposed_Suprapubic:GTEx/v8/Skin_Sun_Exposed_Lower_leg:GTEx/v8/Thyroid	+	Yes	Spleen	5.97774e-22	rs12631248;rs2526754;rs7648987;rs11712056;rs2014830;rs6446298;rs11720264;rs2280405;rs13100903;rs2188151	54
ENSG00000185614	FAM212A	3	49840687	49842463	0.000589161	NA	16	13.02	659	6.9165e-54	0	eQTLcatalogue/CEDAR_B-cell_CD19:eQTLcatalogue/Fairfax_2012_B-cell_CD19:eQTLcatalogue/TwinsUK_ge_skin:PsychENCODE_eQTLs:eQTLGen_cis_eQTLs:BIOSQTL/BIOS_eQTL_geneLevel:GTEx/v8/Artery_Aorta:GTEx/v8/Artery_Tibial:GTEx/v8/Brain_Cerebellar_Hemisphere:GTEx/v8/Brain_Cerebellum:GTEx/v8/Brain_Nucleus_accumbens_basal_ganglia:GTEx/v8/Esophagus_Mucosa:GTEx/v8/Muscle_Skeletal:GTEx/v8/Ovary:GTEx/v8/Cells_Culture…	+	Yes	Promoter_anchored_loops:Spleen	5.97774e-22	rs4768;rs7648987;rs12631248;rs11720264;rs6446298;rs2280405;rs2526754;rs11712056;rs2014830;rs13100903;rs2624847;rs2188151;rs7648987:rs2188151:rs11712056:rs12631248:rs2526754;rs11712056:rs2526754	54
ENSG00000173540	GMPPB	3	49754277	49761384	8.24536e-05	-0.659554	28	15.82	504	4.55485e-35	0	eQTLcatalogue/BLUEPRINT_ge_monocyte:eQTLcatalogue/BLUEPRINT_ge_neutrophil:eQTLcatalogue/BLUEPRINT_ge_T-cell:eQTLcatalogue/BrainSeq_ge_brain:eQTLcatalogue/GENCORD_ge_fibroblast:eQTLcatalogue/GENCORD_ge_T-cell:eQTLcatalogue/Lepik_2017_ge_blood:eQTLcatalogue/TwinsUK_ge_fat:eQTLcatalogue/TwinsUK_ge_skin:PsychENCODE_eQTLs:BIOSQTL/BIOS_eQTL_geneLevel:GTEx/v8/Adipose_Subcutaneous:GTEx/v8/Adipose_Viscera…	+	Yes	Promoter_anchored_loops:Adult_Cortex:Fetal_Cortex:GM12878:IMR90:Mesenchymal_Stem_Cell	5.97774e-22	rs7648987;rs4768;rs12631248;rs11712056;rs2526754;rs6446298;rs2014830;rs11720264;rs13100903;rs2188151;rs2280405;rs2624847;rs7648987:rs4768:rs2526754;rs11712056:rs12631248:rs2526754;rs11712056:rs2526754:rs2188151:rs11712056:rs11720264	54
ENSG00000233276	GPX1	3	49394609	49396033	0.00693165	-0.616399	4	7.094	577	3.12059e-35	0	PsychENCODE_eQTLs:eQTLGen_cis_eQTLs:BIOSQTL/BIOS_eQTL_geneLevel:xQTLServer_eQTLs:CMC_SVA_cis:GTEx/v8/Adipose_Subcutaneous:GTEx/v8/Adrenal_Gland:GTEx/v8/Brain_Cerebellum:GTEx/v8/Brain_Cortex:GTEx/v8/Brain_Nucleus_accumbens_basal_ganglia:GTEx/v8/Colon_Transverse:GTEx/v8/Esophagus_Mucosa:GTEx/v8/Pancreas:GTEx/v8/Prostate:GTEx/v8/Cells_Cultured_fibroblasts:GTEx/v8/Skin_Not_Sun_Exposed_Suprapubic:GTEx…	-	Yes	Promoter_anchored_loops	5.97774e-22	rs11720264;rs7648987;rs2526754;rs11712056;rs13100903;rs2188151;rs4768;rs2280405;rs12631248;rs2624847;rs11720264:rs12631248:rs11712056:rs2188151	54
ENSG00000114735	HEMK1	3	50606583	50622366	8.23153e-05	-2.53452	0	0	381	1.0401e-22	0	eQTLcatalogue/BrainSeq_ge_brain:eQTLcatalogue/HipSci_ge_iPSC:PsychENCODE_eQTLs:eQTLGen_cis_eQTLs:GTEx/v8/Whole_Blood:GTEx/v8/Esophagus_Muscularis:GTEx/v8/Heart_Atrial_Appendage:GTEx/v8/Lung:GTEx/v8/Muscle_Skeletal:GTEx/v8/Nerve_Tibial:GTEx/v8/Skin_Sun_Exposed_Lower_leg	-	Yes	Promoter_anchored_loops	5.97774e-22	rs12631248;rs2526754;rs11712056;rs7648987;rs2280405;rs13100903;rs2188151;rs4768;rs2624847;rs11720264;rs2188151:rs11712056:rs12631248	54
ENSG00000114378	HYAL1	3	50337320	50349812	0.00553671	0.476164	0	0	294	1.5913e-17	8.73518e-21	xQTLServer_eQTLs:GTEx/v8/Adipose_Subcutaneous:GTEx/v8/Adipose_Visceral_Omentum:GTEx/v8/Adrenal_Gland:GTEx/v8/Artery_Tibial:GTEx/v8/Heart_Left_Ventricle:GTEx/v8/Lung:GTEx/v8/Muscle_Skeletal:GTEx/v8/Nerve_Tibial:GTEx/v8/Pancreas:GTEx/v8/Cells_Cultured_fibroblasts:GTEx/v8/Skin_Not_Sun_Exposed_Suprapubic:GTEx/v8/Skin_Sun_Exposed_Lower_leg:GTEx/v8/Spleen:GTEx/v8/Thyroid	+	Yes	Promoter_anchored_loops	5.97774e-22	rs2188151;rs11712056;rs2526754;rs7648987;rs13100903;rs2014830;rs6446298;rs4768;rs7648987:rs4768:rs11712056	54
ENSG00000186792	HYAL3	3	50330262	50336899	1.52466e-05	-0.35315	0	0	621	3.27170000000001e-310	0	eQTLcatalogue/BrainSeq_ge_brain:eQTLcatalogue/CEDAR_B-cell_CD19:eQTLcatalogue/CEDAR_monocyte_CD14:eQTLcatalogue/CEDAR_platelet:eQTLcatalogue/Fairfax_2012_B-cell_CD19:eQTLcatalogue/Fairfax_2014_IFN24:eQTLcatalogue/Fairfax_2014_LPS24:eQTLcatalogue/Fairfax_2014_LPS2:eQTLcatalogue/Fairfax_2014_naive:eQTLcatalogue/GENCORD_ge_fibroblast:eQTLcatalogue/HipSci_ge_iPSC:eQTLcatalogue/Lepik_2017_ge_blood:eQT…	-	Yes	Promoter_anchored_loops	5.97774e-22	rs2188151;rs2014830;rs6446298;rs11720264;rs13100903;rs11712056;rs7648987;rs2280405;rs2526754;rs12631248;rs4768;rs2624847;rs7648987:rs4768:rs2526754	54
ENSG00000214706	IFRD2	3	50325163	50330349	5.5261e-06	-0.616738	1	1.434	331	2.10874e-62	0	eQTLGen_cis_eQTLs:BIOSQTL/BIOS_eQTL_geneLevel:GTEx/v8/Muscle_Skeletal:GTEx/v8/Stomach	-	Yes	Promoter_anchored_loops	5.97774e-22	rs12631248;rs11720264;rs2526754;rs11712056;rs2014830;rs6446298;rs2188151;rs13100903;rs2624847;rs7648987:rs4768:rs2526754:rs13100903:rs2526754;rs11712056:rs11712056:rs2188151	54
ENSG00000176095	IP6K1	3	49761727	49823975	0.23518	-2.10343	92	17.96	443	9.67983e-09	4.83991e-05	eQTLcatalogue/Nedelec_2016_ge_macrophage_Salmonella:eQTLcatalogue/Quach_2016_ge_monocyte_IAV:GTEx/v8/Adipose_Visceral_Omentum:GTEx/v8/Artery_Tibial:GTEx/v8/Brain_Cerebellar_Hemisphere:GTEx/v8/Esophagus_Mucosa:GTEx/v8/Nerve_Tibial:GTEx/v8/Skin_Sun_Exposed_Lower_leg:GTEx/v8/Thyroid	+	Yes	Promoter_anchored_loops:Adult_Cortex	5.97774e-22	rs4768;rs7648987;rs12631248;rs6446298;rs11720264;rs11712056;rs2526754;rs2280405;rs13100903;rs2014830;rs7648987:rs4768:rs2188151:rs11712056	54
ENSG00000185909	KLHDC8B	3	49209044	49213917	0.0104214	-0.0773522	0	0	592	8.1989e-58	0	eQTLcatalogue/TwinsUK_ge_LCL:eQTLGen_cis_eQTLs:eQTLGen_trans_eQTLs:GTEx/v8/Whole_Blood:GTEx/v8/Artery_Tibial:GTEx/v8/Brain_Cerebellum:GTEx/v8/Colon_Sigmoid:GTEx/v8/Esophagus_Mucosa:GTEx/v8/Esophagus_Muscularis:GTEx/v8/Lung:GTEx/v8/Nerve_Tibial:GTEx/v8/Cells_Cultured_fibroblasts:GTEx/v8/Skin_Not_Sun_Exposed_Suprapubic:GTEx/v8/Skin_Sun_Exposed_Lower_leg:GTEx/v8/Thyroid	-	Yes	Promoter_anchored_loops:Adult_Cortex:Fetal_Cortex	5.97774e-22	rs11720264;rs7638388;rs12631248;rs7648987;rs6446298;rs2280405;rs2526754;rs11712056;rs13100903;rs2624847;rs2188151;rs17162333;rs4768;rs12631248:rs11720264	53;54
ENSG00000114738	MAPKAPK3	3	50648951	50686720	2.71041e-06	0.0772686	1	11.47	393	1.3114e-42	0	eQTLcatalogue/Fairfax_2014_LPS24:eQTLcatalogue/Fairfax_2014_naive:eQTLcatalogue/Lepik_2017_ge_blood:PsychENCODE_eQTLs:eQTLGen_cis_eQTLs:GTEx/v8/Muscle_Skeletal:GTEx/v8/Thyroid	-	No	NA	5.97774e-22	rs12631248;rs7648987;rs4768;rs11712056;rs2526754;rs6446298;rs2280405;rs2014830;rs13100903;rs2188151	54
ENSG00000164077	MON1A	3	49946302	49967606	0.00636811	-0.629673	44	15.79	639	1.2173e-88	0	eQTLcatalogue/Fairfax_2012_B-cell_CD19:eQTLcatalogue/Fairfax_2014_IFN24:eQTLcatalogue/Fairfax_2014_LPS24:eQTLcatalogue/Fairfax_2014_naive:eQTLGen_cis_eQTLs:GTEx/v8/Adrenal_Gland:GTEx/v8/Whole_Blood:GTEx/v8/Artery_Aorta:GTEx/v8/Artery_Tibial:GTEx/v8/Esophagus_Muscularis:GTEx/v8/Pituitary:GTEx/v8/Testis:GTEx/v8/Thyroid	-	Yes	Promoter_anchored_loops:Adult_Cortex:Fetal_Cortex	5.97774e-22	rs12631248;rs2526754;rs7648987;rs11712056;rs13100903;rs2624847;rs11720264;rs4768;rs6446298;rs2280405;rs2014830;rs2188151;rs11712056:rs11720264:rs7648987:rs4768:rs2526754;rs11712056:rs12631248:rs2526754;rs11712056:rs2526754:rs2188151	54
ENSG00000164078	MST1R	3	49924435	49941299	1.69349e-20	-0.377645	34	18.51	617	4.4181e-21	3.12618e-16	eQTLcatalogue/BrainSeq_ge_brain:eQTLcatalogue/TwinsUK_ge_fat:BIOSQTL/BIOS_eQTL_geneLevel:GTEx/v8/Adipose_Subcutaneous:GTEx/v8/Adipose_Visceral_Omentum:GTEx/v8/Whole_Blood:GTEx/v8/Artery_Aorta:GTEx/v8/Artery_Tibial:GTEx/v8/Brain_Anterior_cingulate_cortex_BA24:GTEx/v8/Brain_Caudate_basal_ganglia:GTEx/v8/Brain_Cerebellar_Hemisphere:GTEx/v8/Brain_Cerebellum:GTEx/v8/Brain_Cortex:GTEx/v8/Brain_Hypothal…	+	Yes	Promoter_anchored_loops	5.97774e-22	rs2526754;rs7648987;rs11712056;rs12631248;rs4768;rs6446298;rs2280405;rs2188151;rs2014830;rs11720264;rs13100903;rs2624847;rs7648987:rs2526754;rs11712056:rs12631248:rs2188151	54
ENSG00000243477	NAT6	3	50333833	50336852	0.402945	-0.113189	0	0	405	1.6341e-43	0	PsychENCODE_eQTLs:eQTLGen_cis_eQTLs:BIOSQTL/BIOS_eQTL_geneLevel:GTEx/v8/Adipose_Subcutaneous:GTEx/v8/Adipose_Visceral_Omentum:GTEx/v8/Artery_Aorta:GTEx/v8/Artery_Tibial:GTEx/v8/Brain_Anterior_cingulate_cortex_BA24:GTEx/v8/Brain_Caudate_basal_ganglia:GTEx/v8/Brain_Cortex:GTEx/v8/Brain_Frontal_Cortex_BA9:GTEx/v8/Brain_Hypothalamus:GTEx/v8/Breast_Mammary_Tissue:GTEx/v8/Colon_Sigmoid:GTEx/v8/Colon_Tr…	+	Yes	Promoter_anchored_loops	5.97774e-22	rs2526754;rs11712056;rs13100903;rs2188151;rs11720264;rs12631248;rs6446298;rs2280405;rs7648987;rs2014830;rs7648987:rs4768:rs2526754	54
ENSG00000145029	NICN1	3	49460379	49466759	0.257246	-1.08729	13	13.86	627	3.3965e-157	0	eQTLcatalogue/CEDAR_T-cell_CD4:eQTLcatalogue/CEDAR_T-cell_CD8:eQTLcatalogue/Fairfax_2012_B-cell_CD19:eQTLcatalogue/Fairfax_2014_LPS2:eQTLcatalogue/Kasela_2017_T-cell_CD4:eQTLcatalogue/Kasela_2017_T-cell_CD8:eQTLcatalogue/Naranbhai_2015_neutrophil_CD16:PsychENCODE_eQTLs:DICE/T_CD8_naive:DICE/Monocyte_classical:DICE/T_CD4_TH1_17:eQTLGen_cis_eQTLs:CMC_SVA_cis:CMC_NoSVA_cis:GTEx/v8/Adipose_Subcutaneo…	-	No	NA	5.97774e-22	rs11720264;rs12631248;rs13100903;rs4768;rs2526754;rs11712056;rs2014830;rs6446298;rs2624847;rs2188151;rs7648987;rs2280405	54
ENSG00000068028	RASSF1	3	50367219	50378411	4.8582e-08	-0.411947	0	0	205	2.60828e-05	2.70638e-09	GTEx/v8/Adipose_Subcutaneous:GTEx/v8/Brain_Cerebellum:GTEx/v8/Skin_Not_Sun_Exposed_Suprapubic:GTEx/v8/Spleen	+	Yes	Promoter_anchored_loops:Adult_Cortex:Fetal_Cortex:IMR90:Mesendoderm:hESC	5.97774e-22	rs2280405;rs2526754;rs7648987;rs11712056;rs2624847;rs13100903;rs2188151;rs7648987:rs2188151:rs11712056:rs12631248:rs2526754	54
ENSG00000003756	RBM5	3	50126341	50156454	0.999999	-0.605889	57	18.47	261	6.26038e-08	5.63793e-05	eQTLGen_cis_eQTLs:BIOSQTL/BIOS_eQTL_geneLevel:GTEx/v8/Adipose_Visceral_Omentum:GTEx/v8/Esophagus_Mucosa:GTEx/v8/Nerve_Tibial	-	Yes	Promoter_anchored_loops:Adult_Cortex:Fetal_Cortex:Liver:Spleen:GM12878:IMR90:Mesenchymal_Stem_Cell:Mesendoderm:Trophoblast-like_Cell:hESC	5.97774e-22	rs2526754;rs12631248;rs13100903;rs11712056;rs7648987;rs2280405;rs2014830;rs6446298;rs2188151;rs7648987:rs12631248:rs2526754:rs2188151:rs11712056:rs4768:rs2526754	54
ENSG00000004534	RBM6	3	49977440	50137478	1	-0.685653	279	17.77	719	0	0	eQTLcatalogue/Alasoo_2018_ge_macrophage_IFNg:eQTLcatalogue/Alasoo_2018_ge_macrophage_naive:eQTLcatalogue/BLUEPRINT_ge_monocyte:eQTLcatalogue/BLUEPRINT_ge_neutrophil:eQTLcatalogue/BLUEPRINT_ge_T-cell:eQTLcatalogue/BrainSeq_ge_brain:eQTLcatalogue/CEDAR_neutrophil_CD15:eQTLcatalogue/Fairfax_2012_B-cell_CD19:eQTLcatalogue/Fairfax_2014_naive:eQTLcatalogue/GENCORD_ge_fibroblast:eQTLcatalogue/GENCORD_ge…	-	Yes	Promoter_anchored_loops	5.97774e-22	rs12631248;rs2526754;rs11712056;rs13100903;rs2014830;rs6446298;rs2624847;rs7648987;rs2280405;rs4768;rs2188151;rs11720264;rs10838760;rs7648987:rs2526754:rs2188151:rs11712056:rs12631248	54;150
ENSG00000067560	RHOA	3	49396578	49450431	0.804698	-0.430263	34	13.86	324	1.54061e-07	2.138e-14	CMC_SVA_cis:GTEx/v8/Adipose_Visceral_Omentum:GTEx/v8/Muscle_Skeletal:GTEx/v8/Nerve_Tibial	+	Yes	Promoter_anchored_loops:Adult_Cortex:Fetal_Cortex	5.97774e-22	rs11720264;rs12631248;rs2188151;rs7648987;rs2526754;rs11712056;rs13100903;rs11720264:rs12631248:rs2526754;rs11712056:rs2526754;rs11712056:rs7648987:rs2526754:rs2188151:rs11712056:rs4768	54
ENSG00000164068	RNF123	3	49726932	49758962	0.969715	-0.461991	38	15.82	577	4.55485e-35	0	eQTLcatalogue/BLUEPRINT_ge_monocyte:eQTLcatalogue/BrainSeq_ge_brain:eQTLcatalogue/GEUVADIS_ge_LCL:eQTLcatalogue/Quach_2016_ge_monocyte_IAV:eQTLcatalogue/Quach_2016_ge_monocyte_naive:eQTLcatalogue/Quach_2016_ge_monocyte_Pam3CSK4:eQTLcatalogue/Quach_2016_ge_monocyte_R848:eQTLcatalogue/TwinsUK_ge_fat:eQTLcatalogue/TwinsUK_ge_skin:PsychENCODE_eQTLs:eQTLGen_cis_eQTLs:BIOSQTL/BIOS_eQTL_geneLevel:CMC_SV…	+	Yes	Promoter_anchored_loops	5.97774e-22	rs12631248;rs11720264;rs4768;rs7648987;rs2280405;rs6446298;rs2526754;rs11712056;rs2624847;rs2014830;rs13100903;rs2188151;rs11720264:rs12631248:rs2526754;rs11712056:rs2526754	54
ENSG00000001617	SEMA3F	3	50192478	50226508	0.999918	NA	38	19.09	448	7.03104e-14	8.517e-09	eQTLcatalogue/Quach_2016_ge_monocyte_IAV:eQTLcatalogue/Quach_2016_ge_monocyte_LPS:eQTLcatalogue/Quach_2016_ge_monocyte_naive:eQTLcatalogue/Quach_2016_ge_monocyte_R848:PsychENCODE_eQTLs:BIOSQTL/BIOS_eQTL_geneLevel:xQTLServer_eQTLs:CMC_SVA_cis:GTEx/v8/Adipose_Subcutaneous:GTEx/v8/Adipose_Visceral_Omentum:GTEx/v8/Artery_Aorta:GTEx/v8/Brain_Cortex:GTEx/v8/Brain_Hippocampus:GTEx/v8/Esophagus_Musculari…	-	Yes	Promoter_anchored_loops	5.97774e-22	rs11712056;rs2188151;rs2526754;rs12631248;rs2624847;rs7648987;rs2280405;rs13100903;rs4768;rs11720264;rs12631248:rs2526754:rs2188151:rs11712056	54
ENSG00000145022	TCTA	3	49449639	49453908	0.0132648	-0.595941	8	13.86	537	7.1049e-15	0	eQTLGen_cis_eQTLs:BIOSQTL/BIOS_eQTL_geneLevel:GTEx/v8/Whole_Blood:GTEx/v8/Artery_Aorta:GTEx/v8/Colon_Transverse:GTEx/v8/Esophagus_Gastroesophageal_Junction:GTEx/v8/Esophagus_Mucosa:GTEx/v8/Muscle_Skeletal:GTEx/v8/Cells_Cultured_fibroblasts:GTEx/v8/Skin_Not_Sun_Exposed_Suprapubic:GTEx/v8/Skin_Sun_Exposed_Lower_leg:GTEx/v8/Thyroid	+	Yes	Promoter_anchored_loops:Adult_Cortex:Fetal_Cortex	5.97774e-22	rs11720264;rs12631248;rs13100903;rs4768;rs2624847;rs7648987;rs2526754;rs11712056;rs2188151;rs11720264:rs12631248:rs2526754;rs11712056:rs2526754;rs11712056:rs7648987:rs2526754:rs2188151:rs11712056:rs4768	54
ENSG00000183763	TRAIP	3	49866034	49894007	0.125104	-0.132255	41	17.61	353	7.23953e-11	1.80825e-07	CMC_SVA_cis:GTEx/v8/Cells_Cultured_fibroblasts:GTEx/v8/Skin_Not_Sun_Exposed_Suprapubic:GTEx/v8/Testis	+	Yes	Promoter_anchored_loops:Adult_Cortex:Fetal_Cortex:Spleen:IMR90:Mesenchymal_Stem_Cell	5.97774e-22	rs7648987;rs4768;rs6446298;rs2280405;rs12631248;rs2526754;rs11712056;rs2188151;rs13100903;rs11720264;rs2624847;rs2188151:rs11712056:rs7648987:rs4768:rs12631248:rs2526754	54
ENSG00000182179	UBA7	3	49842640	49851379	2.68228e-14	-0.315381	20	13.02	726	3.27170000000001e-310	0	eQTLcatalogue/BLUEPRINT_ge_monocyte:eQTLcatalogue/BLUEPRINT_ge_neutrophil:eQTLcatalogue/BLUEPRINT_ge_T-cell:eQTLcatalogue/CEDAR_B-cell_CD19:eQTLcatalogue/CEDAR_ileum:eQTLcatalogue/CEDAR_monocyte_CD14:eQTLcatalogue/CEDAR_neutrophil_CD15:eQTLcatalogue/CEDAR_rectum:eQTLcatalogue/CEDAR_T-cell_CD4:eQTLcatalogue/CEDAR_T-cell_CD8:eQTLcatalogue/CEDAR_transverse_colon:eQTLcatalogue/Fairfax_2012_B-cell_CD1…	-	Yes	Promoter_anchored_loops:Spleen	5.97774e-22	rs12631248;rs4768;rs7648987;rs6446298;rs2526754;rs11712056;rs11720264;rs2280405;rs2014830;rs13100903;rs2188151;rs2624847;rs7648987:rs12631248:rs4768:rs2188151:rs11712056:rs2526754;rs11712056:rs2526754	54
ENSG00000176020	AMIGO3	3	49754267	49761349	7.50516e-06	NA	28	15.82	173	4.55485e-35	0	BIOSQTL/BIOS_eQTL_geneLevel	+	Yes	Promoter_anchored_loops:Adult_Cortex:Fetal_Cortex:GM12878:IMR90:Mesenchymal_Stem_Cell	6.83164e-22	rs7648987;rs4768;rs12631248;rs11720264;rs6446298;rs2280405;rs2526754;rs11712056;rs2014830;rs13100903;rs7648987:rs4768:rs2526754;rs11712056:rs12631248:rs2526754;rs11712056:rs2526754:rs2188151:rs11712056:rs11720264	54
ENSG00000177479	ARIH2	3	48956254	49023815	0.987412	-1.69992	0	0	245	1.7943e-46	0	eQTLcatalogue/TwinsUK_ge_skin:PsychENCODE_eQTLs:DICE/Monocyte_non_classical:eQTLGen_cis_eQTLs:BIOSQTL/BIOS_eQTL_geneLevel:GTEx/v8/Adipose_Subcutaneous:GTEx/v8/Adrenal_Gland:GTEx/v8/Colon_Transverse:GTEx/v8/Esophagus_Mucosa:GTEx/v8/Heart_Atrial_Appendage:GTEx/v8/Lung:GTEx/v8/Nerve_Tibial:GTEx/v8/Pancreas:GTEx/v8/Cells_Cultured_fibroblasts:GTEx/v8/Skin_Not_Sun_Exposed_Suprapubic:GTEx/v8/Skin_Sun_Ex…	+	No	NA	6.83164e-22	rs11720264;rs12631248;rs4768;rs7648987;rs2280405;rs2526754;rs11712056	54
ENSG00000178467	P4HTM	3	49027319	49044587	0.0232749	NA	0	0	383	2.6412e-101	0	eQTLcatalogue/CEDAR_T-cell_CD4:eQTLcatalogue/Fairfax_2014_naive:eQTLcatalogue/GEUVADIS_ge_LCL:eQTLcatalogue/Lepik_2017_ge_blood:PsychENCODE_eQTLs:DICE/Monocyte_classical:eQTLGen_cis_eQTLs:BIOSQTL/BIOS_eQTL_geneLevel:CMC_SVA_cis:GTEx/v8/Adrenal_Gland:GTEx/v8/Whole_Blood:GTEx/v8/Brain_Cerebellum:GTEx/v8/Brain_Cortex:GTEx/v8/Brain_Hypothalamus:GTEx/v8/Brain_Spinal_cord_cervical_c-1:GTEx/v8/Breast_Ma…	+	Yes	Promoter_anchored_loops	6.83164e-22	rs11720264;rs4768;rs7638388;rs12631248;rs7648987;rs2280405;rs2526754;rs11712056;rs13100903;rs11720264:rs7648987	53;54
ENSG00000178252	WDR6	3	49044495	49053386	9.19648e-07	-0.0589495	0	0	504	3.27170000000001e-310	0	eQTLcatalogue/Alasoo_2018_ge_macrophage_IFNg:eQTLcatalogue/Alasoo_2018_ge_macrophage_naive:eQTLcatalogue/Alasoo_2018_ge_macrophage_Salmonella:eQTLcatalogue/BLUEPRINT_ge_monocyte:eQTLcatalogue/BLUEPRINT_ge_neutrophil:eQTLcatalogue/BrainSeq_ge_brain:eQTLcatalogue/CEDAR_ileum:eQTLcatalogue/CEDAR_monocyte_CD14:eQTLcatalogue/CEDAR_neutrophil_CD15:eQTLcatalogue/CEDAR_rectum:eQTLcatalogue/CEDAR_transver…	-	Yes	Adult_Cortex:Fetal_Cortex	6.83164e-22	rs11720264;rs4768;rs2280405;rs2526754;rs7648987;rs11712056;rs6446298;rs12631248;rs7638388;rs2014830;rs13100903;rs2624847;rs11720264:rs7648987:rs4768:rs12631248:rs2526754:rs2188151:rs11712056	53;54
ENSG00000164061	BSN	3	49591922	49708978	1	-1.28511	41	19.76	423	4.84343e-18	0	eQTLGen_cis_eQTLs:BIOSQTL/BIOS_eQTL_geneLevel:xQTLServer_eQTLs:GTEx/v8/Artery_Tibial:GTEx/v8/Liver:GTEx/v8/Thyroid	-	Yes	Promoter_anchored_loops:Adult_Cortex:Fetal_Cortex:Left_Ventricle:Liver:Spleen:IMR90:Mesenchymal_Stem_Cell:Mesendoderm:Trophoblast-like_Cell:hESC	7.29053e-22	rs11720264;rs12631248;rs4768;rs7648987;rs2526754;rs11712056;rs13100903;rs2188151;rs2280405;rs11720264:rs12631248:rs7648987:rs4768	54
ENSG00000177352	CCDC71	3	49199968	49203754	0.0169896	NA	1	1.246	212	7.4528e-28	0	eQTLcatalogue/Fairfax_2014_LPS2:eQTLcatalogue/Quach_2016_ge_monocyte_IAV:eQTLcatalogue/TwinsUK_ge_LCL:eQTLcatalogue/TwinsUK_ge_skin:eQTLGen_cis_eQTLs:BIOSQTL/BIOS_eQTL_geneLevel:GTEx/v8/Whole_Blood:GTEx/v8/Brain_Caudate_basal_ganglia:GTEx/v8/Brain_Cerebellar_Hemisphere:GTEx/v8/Brain_Cerebellum:GTEx/v8/Brain_Frontal_Cortex_BA9:GTEx/v8/Brain_Nucleus_accumbens_basal_ganglia:GTEx/v8/Brain_Putamen_bas…	-	Yes	Promoter_anchored_loops:Adult_Cortex:Fetal_Cortex	7.29053e-22	rs12631248;rs11720264;rs4768;rs2526754;rs2624847;rs12631248:rs11720264	54
ENSG00000205213	LGR4	11	27387508	27494322	0.994113	0.243578	21	18.27	146	7.3419e-51	0	eQTLcatalogue/BLUEPRINT_ge_monocyte:eQTLcatalogue/Nedelec_2016_ge_macrophage_naive:eQTLGen_cis_eQTLs:BIOSQTL/BIOS_eQTL_geneLevel:CMC_SVA_cis	-	Yes	Left_Ventricle:Mesenchymal_Stem_Cell:hESC	8.69613e-22	rs4514364;rs12807253;rs4923456;rs6484314;rs10501086;rs6265;rs11030086;rs6484478:rs1222220:rs4514364:rs12807253:rs6484314	147;148
ENSG00000173531	MST1	3	49721380	49726934	1.72736e-10	0.158165	12	15.38	513	2.70954e-19	0	eQTLcatalogue/BrainSeq_ge_brain:eQTLcatalogue/TwinsUK_ge_skin:PsychENCODE_eQTLs:eQTLGen_cis_eQTLs:BIOSQTL/BIOS_eQTL_geneLevel:CMC_SVA_cis:BRAINEAC/SNIG:GTEx/v8/Adipose_Subcutaneous:GTEx/v8/Adipose_Visceral_Omentum:GTEx/v8/Artery_Aorta:GTEx/v8/Artery_Coronary:GTEx/v8/Artery_Tibial:GTEx/v8/Brain_Amygdala:GTEx/v8/Brain_Anterior_cingulate_cortex_BA24:GTEx/v8/Brain_Caudate_basal_ganglia:GTEx/v8/Brain_…	-	Yes	Promoter_anchored_loops	1.02569e-21	rs11720264;rs12631248;rs4768;rs7648987;rs6446298;rs2014830;rs2526754;rs11712056;rs2188151;rs2624847;rs11720264:rs12631248:rs2526754;rs11712056:rs2526754	54
ENSG00000143340	FAM163A	1	179712298	179785333	0.579851	-0.258215	0	0	0	NA	NA	NA	NA	Yes	Mesenchymal_Stem_Cell	1.37646e-21	rs12135579:rs4081366:rs1854288:rs12760319	21
ENSG00000114349	GNAT1	3	50229045	50233949	2.50523e-06	-0.274733	13	14.65	42	6.26752e-05	0.0214064	GTEx/v8/Lung	-	Yes	EP_links_oneway:Promoter_anchored_loops:Adult_Cortex:Fetal_Cortex:Liver:Spleen:IMR90:Mesenchymal_Stem_Cell:Mesendoderm:Trophoblast-like_Cell:hESC	1.52963e-21	rs2188151;rs11712056;rs7648987;rs2526754;rs11712056:rs12631248:rs11712056:rs2188151:rs2526754:rs11720264:rs7648987:rs4768:rs2526754	54
ENSG00000114353	GNAI2	3	50263724	50296787	0.86116	-0.965006	1	9.243	195	6.9049e-06	1.00215e-05	eQTLGen_cis_eQTLs:GTEx/v8/Whole_Blood:GTEx/v8/Skin_Sun_Exposed_Lower_leg	-	Yes	Promoter_anchored_loops:Adult_Cortex:Fetal_Cortex:IMR90:Mesenchymal_Stem_Cell:Trophoblast-like_Cell	1.89127e-21	rs12631248;rs2188151;rs11712056;rs2526754;rs13100903:rs2526754:rs2526754;rs11712056:rs2188151:rs11720264:rs7648987:rs4768:rs12631248:rs11712056	54
ENSG00000172037	LAMB2	3	49158547	49170551	7.45007e-11	-0.451082	0	0	174	3.1511e-16	0	eQTLGen_cis_eQTLs:BIOSQTL/BIOS_eQTL_geneLevel:GTEx/v8/Adipose_Visceral_Omentum	-	Yes	Promoter_anchored_loops:Adult_Cortex:Fetal_Cortex	1.89127e-21	rs12631248;rs11720264;rs4768;rs13100903;rs11720264:rs7648987:rs13100903:rs2526754:rs2526754;rs11712056:rs12631248:rs2188151:rs11712056	54
ENSG00000172046	USP19	3	49145479	49158371	0.999992	-0.429633	1	20.1	1	0.000403265	0.0159096	GTEx/v8/Muscle_Skeletal	NA	Yes	Promoter_anchored_loops:Adult_Cortex:Fetal_Cortex:Left_Ventricle:GM12878:IMR90:Mesenchymal_Stem_Cell:Trophoblast-like_Cell	1.89127e-21	rs12631248;rs11720264;rs13100903:rs2526754:rs2526754;rs11712056:rs11720264:rs12631248	54
ENSG00000174482	LINGO2	9	27948076	28670283	0.807167	-0.935732	56	17.45	0	NA	NA	NA	NA	No	NA	2.39049e-21	rs1412239;rs10757740;rs1929812;rs7848314	132
ENSG00000173402	DAG1	3	49506146	49573048	0.940922	-0.838742	42	19.42	291	1.9206e-26	0	eQTLcatalogue/Fairfax_2014_LPS2:eQTLcatalogue/Quach_2016_ge_monocyte_Pam3CSK4:eQTLGen_cis_eQTLs:BIOSQTL/BIOS_eQTL_geneLevel:GTEx/v8/Whole_Blood:GTEx/v8/Esophagus_Mucosa:GTEx/v8/Heart_Left_Ventricle:GTEx/v8/Cells_Cultured_fibroblasts:GTEx/v8/Thyroid	-	No	NA	2.89344e-21	rs11720264;rs12631248;rs4768;rs7648987;rs2526754;rs2624847;rs13100903;rs2188151	54
ENSG00000154065	ANKRD29	18	21178890	21242849	2.59982e-05	0.183713	0	0	87	1.6305e-08	5.24033e-20	PsychENCODE_eQTLs:CMC_SVA_cis:GTEx/v8/Cells_Cultured_fibroblasts	+	Yes	IMR90	3.25308e-21	rs1788785;rs891387;rs4800452:rs891387:rs1788785	216
ENSG00000141452	C18orf8	18	21083473	21111746	0.999882	NA	69	22.5	245	1.6303e-255	0	eQTLcatalogue/BLUEPRINT_ge_monocyte:eQTLcatalogue/BLUEPRINT_ge_neutrophil:eQTLcatalogue/BrainSeq_ge_brain:eQTLcatalogue/CEDAR_B-cell_CD19:eQTLcatalogue/CEDAR_monocyte_CD14:eQTLcatalogue/CEDAR_neutrophil_CD15:eQTLcatalogue/CEDAR_platelet:eQTLcatalogue/Fairfax_2012_B-cell_CD19:eQTLcatalogue/Fairfax_2014_LPS24:eQTLcatalogue/Fairfax_2014_naive:eQTLcatalogue/Lepik_2017_ge_blood:eQTLcatalogue/Quach_201…	-	Yes	Promoter_anchored_loops:Adult_Cortex:Fetal_Cortex:Hippocampus:Left_Ventricle:Liver:Pancreas:Spleen:GM12878:IMR90:Mesenchymal_Stem_Cell:Mesendoderm:Trophoblast-like_Cell:hESC	3.25308e-21	rs1788785;rs891387;rs11663645;rs7228616;rs11082402;rs11662237;rs4800452;rs891387:rs1788785:rs11663645;rs7228616:rs11663645:rs4800452:rs11663645;rs11082402:rs11662237:rs11663645	216
ENSG00000134508	CABLES1	18	20714528	20840431	0.445044	-1.36023	64	20.2	34	9.0003e-10	2.7463e-06	eQTLcatalogue/TwinsUK_ge_fat:eQTLGen_cis_eQTLs:GTEx/v8/Muscle_Skeletal	+	Yes	Promoter_anchored_loops:Adult_Cortex:Fetal_Cortex:Aorta:Left_Ventricle:Liver:Spleen:GM12878:IMR90:Mesenchymal_Stem_Cell:Mesendoderm:Neural_Progenitor_Cell:Trophoblast-like_Cell:hESC	3.25308e-21	rs4800452;rs12327104;rs11663645;rs11662237;rs7228616;rs11082402:rs11663645;rs11082402:rs12327104:rs11663645;rs11082402:rs7228616:rs11663645;rs11662237:rs891387:rs1788785:rs11663645;rs11082402:rs11662237:rs11663645;rs7228616:rs11663645:rs4800452:rs11082402	216
ENSG00000154040	CABYR	18	21718942	21741567	0.000210501	0.358483	0	0	6	0.000118106	0.0097312	PsychENCODE_eQTLs	NA	Yes	Left_Ventricle:Liver:Spleen:GM12878:IMR90:Mesenchymal_Stem_Cell:Mesendoderm:Neural_Progenitor_Cell:Trophoblast-like_Cell:hESC	3.25308e-21	rs4800452;rs11662237;rs891387:rs1788785:rs4800452:rs11663645;rs11082402:rs11662237:rs11663645;rs11662237:rs11663645;rs7228616:rs11663645	216
ENSG00000053747	LAMA3	18	21269407	21535030	4.40817e-24	0.0689523	0	0	5	0.0001013	8.93997e-05	GTEx/v8/Cells_Cultured_fibroblasts	-	Yes	IMR90	3.25308e-21	rs891387;rs4800452:rs891387:rs1788785	216
ENSG00000141458	NPC1	18	21086148	21166862	0.000213375	-0.263911	111	22.5	228	6.977e-68	0	eQTLcatalogue/Alasoo_2018_ge_macrophage_IFNg_Salmonella:eQTLcatalogue/Alasoo_2018_ge_macrophage_IFNg:eQTLcatalogue/BLUEPRINT_ge_neutrophil:eQTLcatalogue/CEDAR_T-cell_CD8:eQTLcatalogue/Fairfax_2012_B-cell_CD19:eQTLcatalogue/Fairfax_2014_LPS24:eQTLcatalogue/GENCORD_ge_fibroblast:eQTLcatalogue/HipSci_ge_iPSC:eQTLcatalogue/Kasela_2017_T-cell_CD4:eQTLcatalogue/Nedelec_2016_ge_macrophage_Salmonella:eQT…	-	Yes	Promoter_anchored_loops:Adult_Cortex:Fetal_Cortex:Hippocampus:Left_Ventricle:Liver:Pancreas:Spleen:GM12878:IMR90:Mesenchymal_Stem_Cell:Mesendoderm:Trophoblast-like_Cell:hESC	3.25308e-21	rs891387;rs1788785;rs11663645;rs11662237;rs7228616;rs11082402;rs4800452;rs12327104;rs1788785:rs891387:rs11663645;rs11662237:rs11663645;rs7228616:rs11663645:rs4800452:rs11663645;rs11082402:rs11662237	216
ENSG00000101782	RIOK3	18	21032787	21066567	0.000146775	-0.732724	42	13.39	173	4.9033e-18	0	eQTLcatalogue/Fairfax_2012_B-cell_CD19:eQTLcatalogue/Fairfax_2014_IFN24:eQTLcatalogue/Fairfax_2014_LPS24:eQTLcatalogue/Fairfax_2014_LPS2:eQTLcatalogue/Fairfax_2014_naive:eQTLcatalogue/Kasela_2017_T-cell_CD8:PsychENCODE_eQTLs:DICE/NK:eQTLGen_cis_eQTLs:BIOSQTL/BIOS_eQTL_geneLevel:CMC_SVA_cis:GTEx/v8/Artery_Aorta:GTEx/v8/Artery_Tibial:GTEx/v8/Muscle_Skeletal:GTEx/v8/Cells_Cultured_fibroblasts	-	Yes	Promoter_anchored_loops:Adult_Cortex:Aorta:Left_Ventricle:Liver:Spleen:GM12878:IMR90:Mesenchymal_Stem_Cell:Mesendoderm:Neural_Progenitor_Cell:Trophoblast-like_Cell:hESC	3.25308e-21	rs11663645;rs11662237;rs11082402;rs7228616;rs1788785;rs891387;rs4800452;rs1788785:rs891387:rs11663645;rs7228616:rs11663645:rs4800452:rs12327104:rs11663645	216
ENSG00000134490	TMEM241	18	20777108	21017925	7.76288e-05	0.555791	97	17.96	262	8.0261e-182	0	eQTLcatalogue/CEDAR_rectum:eQTLcatalogue/Fairfax_2012_B-cell_CD19:eQTLcatalogue/Fairfax_2014_IFN24:eQTLcatalogue/HipSci_ge_iPSC:eQTLcatalogue/Lepik_2017_ge_blood:eQTLcatalogue/Schwartzentruber_2018_ge_sensory_neuron:eQTLcatalogue/TwinsUK_ge_fat:PsychENCODE_eQTLs:DICE/B_cell_naive:DICE/NK:eQTLGen_cis_eQTLs:BIOSQTL/BIOS_eQTL_geneLevel:CMC_SVA_cis:CMC_NoSVA_cis:GTEx/v8/Adipose_Subcutaneous:GTEx/v8/A…	-	Yes	Adult_Cortex:Fetal_Cortex:Aorta:Left_Ventricle:Liver:Spleen:GM12878:IMR90:Mesenchymal_Stem_Cell:Mesendoderm:Neural_Progenitor_Cell:Trophoblast-like_Cell:hESC	3.25308e-21	rs12327104;rs11663645;rs7228616;rs11082402;rs11662237;rs1788785;rs891387;rs4800452;rs891387:rs4800452:rs12327104:rs11663645;rs11662237:rs11663645;rs7228616:rs11663645:rs1788785	216
ENSG00000087237	CETP	16	56995762	57017757	5.18057e-12	0.0439088	27	9.431	23	1.1943e-42	0	eQTLcatalogue/TwinsUK_ge_LCL:eQTLGen_cis_eQTLs:BIOSQTL/BIOS_eQTL_geneLevel:GTEx/v8/Lung	+	No	NA	4.00212e-21	rs6499861;rs4783962;rs4784745;rs12596776	200
ENSG00000172775	FAM192A	16	57186378	57220028	0.944099	-0.529182	0	0	0	NA	NA	NA	NA	Yes	Adult_Cortex:Aorta:Hippocampus:Left_Ventricle:Liver:Pancreas:Right_Ventricle:Spleen:GM12878:IMR90:Mesenchymal_Stem_Cell:Mesendoderm:Neural_Progenitor_Cell:Trophoblast-like_Cell:hESC	4.00212e-21	rs4783962:rs6499861:rs2895432:rs12596776:rs1366544:rs12446275:rs4784745	200
ENSG00000051108	HERPUD1	16	56965960	56977798	0.821043	-0.272869	18	16.8	123	1.6162e-42	0	eQTLcatalogue/Fairfax_2014_IFN24:eQTLcatalogue/GENCORD_ge_fibroblast:eQTLcatalogue/GEUVADIS_ge_LCL:eQTLcatalogue/TwinsUK_ge_fat:eQTLcatalogue/TwinsUK_ge_LCL:eQTLcatalogue/TwinsUK_ge_skin:eQTLGen_cis_eQTLs:BIOSQTL/BIOS_eQTL_geneLevel:CMC_SVA_cis:GTEx/v8/Esophagus_Mucosa:GTEx/v8/Esophagus_Muscularis:GTEx/v8/Testis	+	Yes	Adult_Cortex:Aorta:Left_Ventricle:Liver:Pancreas:Right_Ventricle:Spleen:GM12878:IMR90:Mesenchymal_Stem_Cell:Mesendoderm:Trophoblast-like_Cell:hESC	4.00212e-21	rs1366544;rs12596776;rs6499861;rs4783962;rs12446275;rs2895432;rs4784745;rs4783962:rs6499861:rs2895432:rs12596776:rs12446275:rs1366544:rs4784745	200
ENSG00000159579	RSPRY1	16	57220049	57274387	0.999778	-0.337763	0	0	0	NA	NA	NA	NA	Yes	Adult_Cortex:Aorta:Hippocampus:Left_Ventricle:Liver:Pancreas:Right_Ventricle:Spleen:GM12878:IMR90:Mesenchymal_Stem_Cell:Mesendoderm:Neural_Progenitor_Cell:Trophoblast-like_Cell:hESC	4.00212e-21	rs4783962:rs6499861:rs2895432:rs12596776:rs1366544:rs12446275:rs4784745	200
ENSG00000070915	SLC12A3	16	56899119	56949762	5.54411e-18	1.05829	106	15.56	71	1.1958e-09	1.188e-05	eQTLcatalogue/GEUVADIS_ge_LCL:eQTLcatalogue/TwinsUK_ge_LCL:eQTLGen_cis_eQTLs:eQTLGen_trans_eQTLs:BIOSQTL/BIOS_eQTL_geneLevel:GTEx/v8/Pancreas	+	No	NA	4.00212e-21	rs2895432;rs12596776;rs12446275;rs1138429;rs1366544;rs6754311;rs4784745	37;200
ENSG00000168092	PAFAH1B2	11	117014983	117047610	0.962029	3.35677	30	18.4	270	2.1331e-94	0	eQTLcatalogue/BLUEPRINT_ge_monocyte:eQTLcatalogue/BLUEPRINT_ge_T-cell:eQTLcatalogue/Fairfax_2014_IFN24:eQTLcatalogue/Fairfax_2014_LPS2:eQTLcatalogue/Lepik_2017_ge_blood:eQTLcatalogue/Quach_2016_ge_monocyte_IAV:eQTLcatalogue/Quach_2016_ge_monocyte_LPS:eQTLcatalogue/Quach_2016_ge_monocyte_naive:eQTLcatalogue/Quach_2016_ge_monocyte_Pam3CSK4:eQTLcatalogue/Quach_2016_ge_monocyte_R848:PsychENCODE_eQTLs…	-	Yes	Promoter_anchored_loops:Adult_Cortex:Fetal_Cortex:Left_Ventricle:Liver:GM12878:IMR90:Mesenchymal_Stem_Cell:Mesendoderm:Trophoblast-like_Cell:hESC	6.17929e-21	rs10892063;rs6589574;rs10047459;rs17119878;rs2000571;rs664059;rs180360;rs619054;rs10892019;rs10488698:rs619054:rs6589574:rs10892063:rs664059:rs2000571:rs180360;rs10892019:rs180326	155
ENSG00000167257	RNF214	11	117103341	117157161	0.830018	NA	2	3.119	154	6.4835e-12	0	PsychENCODE_eQTLs:DICE/T_CD4_naive_TREG:eQTLGen_cis_eQTLs:GTEx/v8/Nerve_Tibial	-	Yes	EP_correlation_cell_type_oneway:Liver:Spleen:IMR90:Mesenchymal_Stem_Cell:Mesendoderm:Trophoblast-like_Cell:hESC	6.17929e-21	rs10892063;rs664059;rs10047459;rs6589574;rs10892063:rs6589574:rs664059:rs10488698:rs619054:rs2000571:rs180360;rs619054;rs10892019:rs180326	155
ENSG00000160584	SIK3	11	116714118	116969153	0.999883	0.278236	159	19.16	121	2.9941e-12	0	eQTLcatalogue/Fairfax_2014_naive:eQTLcatalogue/GEUVADIS_ge_LCL:eQTLGen_cis_eQTLs:GTEx/v8/Esophagus_Mucosa:GTEx/v8/Heart_Left_Ventricle:GTEx/v8/Nerve_Tibial:GTEx/v8/Cells_Cultured_fibroblasts:GTEx/v8/Skin_Not_Sun_Exposed_Suprapubic:GTEx/v8/Skin_Sun_Exposed_Lower_leg	-	Yes	EP_links_oneway:Promoter_anchored_loops:Adult_Cortex:Fetal_Cortex:Aorta:Dorsolateral_Prefrontal_Cortex:Hippocampus:Left_Ventricle:Liver:Pancreas:Right_Ventricle:Spleen:GM12878:IMR90:Mesenchymal_Stem_Cell:Mesendoderm:Neural_Progenitor_Cell:Trophoblast-like_Cell:hESC	6.17929e-21	rs6589574;rs10892063;rs10047459;rs11826999;rs2000571;rs6589574:rs10892063:rs664059:rs10488698:rs619054:rs2000571:rs180360;rs619054;rs10892019:rs180326	155
ENSG00000188315	C3orf62	3	49306035	49315342	0.00712466	-1.95031	2	2.087	189	4.0173e-27	0	eQTLcatalogue/Quach_2016_ge_monocyte_LPS:eQTLcatalogue/Quach_2016_ge_monocyte_naive:eQTLcatalogue/Quach_2016_ge_monocyte_Pam3CSK4:eQTLcatalogue/Quach_2016_ge_monocyte_R848:eQTLcatalogue/TwinsUK_ge_fat:eQTLGen_cis_eQTLs:BIOSQTL/BIOS_eQTL_geneLevel:CMC_SVA_cis:GTEx/v8/Adipose_Subcutaneous:GTEx/v8/Adipose_Visceral_Omentum:GTEx/v8/Adrenal_Gland:GTEx/v8/Colon_Sigmoid:GTEx/v8/Lung	+	Yes	Promoter_anchored_loops:Adult_Cortex:Fetal_Cortex:IMR90:Mesenchymal_Stem_Cell	6.53556e-21	rs11720264;rs7648987;rs12631248;rs4768;rs13100903;rs11712056;rs2014830;rs6446298;rs11720264:rs12631248:rs2526754;rs11712056:rs2188151:rs2526754	54
ENSG00000198218	QRICH1	3	49067140	49131796	0.99607	-0.279294	2	20.1	251	4.9977e-47	0	PsychENCODE_eQTLs:eQTLGen_cis_eQTLs:BIOSQTL/BIOS_eQTL_geneLevel:GTEx/v8/Adipose_Subcutaneous:GTEx/v8/Adipose_Visceral_Omentum:GTEx/v8/Whole_Blood:GTEx/v8/Brain_Cerebellar_Hemisphere:GTEx/v8/Brain_Cerebellum:GTEx/v8/Brain_Frontal_Cortex_BA9:GTEx/v8/Breast_Mammary_Tissue:GTEx/v8/Colon_Transverse:GTEx/v8/Esophagus_Muscularis:GTEx/v8/Heart_Atrial_Appendage:GTEx/v8/Lung:GTEx/v8/Nerve_Tibial:GTEx/v8/Sk…	-	Yes	EP_links_oneway:Promoter_anchored_loops:Adult_Cortex:Left_Ventricle:GM12878:IMR90:Mesenchymal_Stem_Cell:Trophoblast-like_Cell	6.53556e-21	rs12631248;rs11720264;rs4768;rs6446298;rs2014830;rs13100903;rs2526754;rs11712056;rs12631248:rs11720264:rs2526754;rs7648987;rs11712056:rs2526754	54
ENSG00000084674	APOB	2	21224301	21266945	5.49085e-16	-0.346892	17	24.9	28	1.25586e-11	8.9197e-51	eQTLcatalogue/TwinsUK_ge_fat:PsychENCODE_eQTLs:CMC_SVA_cis:CMC_NoSVA_cis:GTEx/v8/Adipose_Subcutaneous:GTEx/v8/Artery_Tibial:GTEx/v8/Colon_Sigmoid:GTEx/v8/Heart_Left_Ventricle:GTEx/v8/Nerve_Tibial:GTEx/v8/Skin_Not_Sun_Exposed_Suprapubic:GTEx/v8/Skin_Sun_Exposed_Lower_leg	-	Yes	Liver:IMR90:Mesenchymal_Stem_Cell:Mesendoderm:Trophoblast-like_Cell:hESC	7.06823e-21	rs13392272;rs1042034	27
ENSG00000163939	PBRM1	3	52579368	52719933	1	NA	0	0	0	NA	NA	NA	NA	Yes	Mesenchymal_Stem_Cell	8.81299e-21	rs2526754:rs2526754;rs11712056:rs12631248	54
ENSG00000174564	IL20RB	3	136665072	136729927	0.000354183	0.165775	2	7.133	169	1.251e-11	0	eQTLcatalogue/BLUEPRINT_ge_neutrophil:eQTLcatalogue/HipSci_ge_iPSC:eQTLcatalogue/TwinsUK_ge_fat:eQTLGen_cis_eQTLs:BIOSQTL/BIOS_eQTL_geneLevel:GTEx/v8/Whole_Blood:GTEx/v8/Esophagus_Mucosa:GTEx/v8/Nerve_Tibial:GTEx/v8/Cells_Cultured_fibroblasts:GTEx/v8/Skin_Not_Sun_Exposed_Suprapubic:GTEx/v8/Skin_Sun_Exposed_Lower_leg	-	No	NA	1.31445e-20	rs13075615;rs503973;rs11717974;rs6773440;rs9845457;rs645040;rs7650071;rs2655008	62
ENSG00000174579	MSL2	3	135867764	135916083	0.889664	-1.74205	12	22.4	73	9.20622e-17	0	eQTLGen_cis_eQTLs:BIOSQTL/BIOS_eQTL_geneLevel:GTEx/v8/Brain_Substantia_nigra:GTEx/v8/Liver:GTEx/v8/Thyroid	-	Yes	Promoter_anchored_loops:Adult_Cortex:Aorta:Hippocampus:Left_Ventricle:Liver:Spleen:GM12878:IMR90:Mesenchymal_Stem_Cell:Mesendoderm:Trophoblast-like_Cell:hESC	1.31445e-20	rs645040;rs503973;rs7650071;rs13075615;rs9845457;rs11717974;rs2655008;rs7650071:rs13075615;rs7650071:rs6773440:rs11717974:rs503973;rs11717974:rs645040:rs645040;rs503973:rs645040;rs2655008:rs13075615	62
ENSG00000158092	NCK1	3	136581050	136668665	0.00103503	-0.568989	18	9.865	193	5.2704e-37	0	eQTLcatalogue/BLUEPRINT_ge_neutrophil:eQTLcatalogue/CEDAR_neutrophil_CD15:eQTLcatalogue/Fairfax_2012_B-cell_CD19:eQTLcatalogue/Fairfax_2014_LPS2:eQTLcatalogue/GEUVADIS_ge_LCL:eQTLcatalogue/Kasela_2017_T-cell_CD4:PsychENCODE_eQTLs:eQTLGen_cis_eQTLs:BIOSQTL/BIOS_eQTL_geneLevel:CMC_SVA_cis:GTEx/v8/Brain_Caudate_basal_ganglia:GTEx/v8/Brain_Hypothalamus:GTEx/v8/Esophagus_Mucosa:GTEx/v8/Cells_Cultured_…	+	Yes	IMR90:Mesenchymal_Stem_Cell	1.31445e-20	rs503973;rs11717974;rs13075615;rs7650071;rs6773440;rs645040;rs2655008;rs503973:rs645040:rs13075615;rs7650071:rs645040;rs503973:rs645040;rs2655008:rs7650071:rs6773440	62
ENSG00000114054	PCCB	3	135969148	136056738	0.000735839	-0.38516	35	9.137	202	3.27170000000001e-310	0	eQTLcatalogue/Alasoo_2018_ge_macrophage_Salmonella:eQTLcatalogue/BLUEPRINT_ge_monocyte:eQTLcatalogue/BrainSeq_ge_brain:eQTLcatalogue/CEDAR_platelet:eQTLcatalogue/CEDAR_T-cell_CD4:eQTLcatalogue/CEDAR_T-cell_CD8:eQTLcatalogue/Fairfax_2012_B-cell_CD19:eQTLcatalogue/Fairfax_2014_IFN24:eQTLcatalogue/Fairfax_2014_LPS24:eQTLcatalogue/Fairfax_2014_naive:eQTLcatalogue/GEUVADIS_ge_LCL:eQTLcatalogue/HipSci_…	+	Yes	EP_links_oneway:Promoter_anchored_loops:Adult_Cortex:Fetal_Cortex:Left_Ventricle:GM12878:IMR90:Mesenchymal_Stem_Cell:Mesendoderm:Trophoblast-like_Cell:hESC	1.31445e-20	rs645040;rs2655008;rs503973;rs7650071;rs13075615;rs6773440;rs9845457;rs11717974;rs7650071:rs645040:rs7650071:rs645040;rs503973:rs13075615:rs6773440	62
ENSG00000168917	SLC35G2	3	136537489	136574734	0.0663953	-0.300343	11	9.865	174	6.55388e-12	0	eQTLcatalogue/GENCORD_ge_T-cell:eQTLcatalogue/Nedelec_2016_ge_macrophage_Listeria:eQTLcatalogue/TwinsUK_ge_blood:eQTLcatalogue/TwinsUK_ge_skin:PsychENCODE_eQTLs:eQTLGen_cis_eQTLs:CMC_SVA_cis:CMC_NoSVA_cis:GTEx/v8/Artery_Aorta:GTEx/v8/Brain_Caudate_basal_ganglia:GTEx/v8/Brain_Putamen_basal_ganglia:GTEx/v8/Esophagus_Mucosa:GTEx/v8/Muscle_Skeletal:GTEx/v8/Spleen:GTEx/v8/Testis	-	Yes	Promoter_anchored_loops:GM12878:IMR90:Mesenchymal_Stem_Cell	1.31445e-20	rs503973;rs11717974;rs13075615;rs645040;rs2655008;rs7650071;rs9845457;rs6773440;rs7650071:rs645040;rs503973:rs645040:rs13075615;rs503973:rs645040;rs2655008:rs6773440	62
ENSG00000118007	STAG1	3	136055077	136471220	1	-0.647638	103	11.32	8	5.1548e-23	0	eQTLGen_cis_eQTLs:BRAINEAC/WHMT	-	Yes	Promoter_anchored_loops:Adult_Cortex:Fetal_Cortex:Aorta:Hippocampus:Left_Ventricle:Liver:Spleen:GM12878:IMR90:Mesenchymal_Stem_Cell:Mesendoderm:Neural_Progenitor_Cell:Trophoblast-like_Cell:hESC	1.31445e-20	rs645040;rs2655008;rs503973;rs13075615;rs7650071;rs11717974;rs9845457;rs2655008:rs13075615;rs7650071:rs645040:rs7650071:rs13075615:rs11717974:rs645040;rs503973:rs645040;rs503973:rs6773440	62
ENSG00000134575	ACP2	11	47260853	47270457	0.000525977	-0.370782	41	23	731	3.27170000000001e-310	0	eQTLcatalogue/BLUEPRINT_ge_monocyte:eQTLcatalogue/BLUEPRINT_ge_neutrophil:eQTLcatalogue/BLUEPRINT_ge_T-cell:eQTLcatalogue/CEDAR_monocyte_CD14:eQTLcatalogue/CEDAR_T-cell_CD4:eQTLcatalogue/CEDAR_T-cell_CD8:eQTLcatalogue/CEDAR_transverse_colon:eQTLcatalogue/Fairfax_2012_B-cell_CD19:eQTLcatalogue/Fairfax_2014_IFN24:eQTLcatalogue/Fairfax_2014_LPS24:eQTLcatalogue/Fairfax_2014_LPS2:eQTLcatalogue/Fairfax…	+	Yes	Promoter_anchored_loops:Adult_Cortex:Fetal_Cortex:Left_Ventricle:GM12878:IMR90:Mesenchymal_Stem_Cell:Mesendoderm:Trophoblast-like_Cell:hESC	2.30376e-20	rs10838681;rs10769254;rs2305280;rs3136441;rs10838620;rs7928842;rs3781627;rs7118178;rs2697920;rs7941758;rs10838760;rs10838620:rs7928842;rs3781627:rs7941758:rs3136441:rs10769254:rs10838681:rs10769254;rs2305280:rs7118178:rs10838760:rs2305280:rs2697920	150
ENSG00000149179	C11orf49	11	46958240	47185936	5.45468e-07	0.564558	92	17.02	679	3.9681e-28	0	eQTLcatalogue/BLUEPRINT_ge_monocyte:eQTLcatalogue/Lepik_2017_ge_blood:eQTLGen_cis_eQTLs:BIOSQTL/BIOS_eQTL_geneLevel:CMC_SVA_cis:BRAINEAC/THAL:GTEx/v8/Artery_Aorta:GTEx/v8/Artery_Coronary:GTEx/v8/Artery_Tibial:GTEx/v8/Colon_Transverse:GTEx/v8/Esophagus_Mucosa:GTEx/v8/Liver:GTEx/v8/Muscle_Skeletal:GTEx/v8/Nerve_Tibial:GTEx/v8/Pancreas:GTEx/v8/Cells_Cultured_fibroblasts:GTEx/v8/Skin_Not_Sun_Exposed_…	+	Yes	Promoter_anchored_loops:Adult_Cortex:Left_Ventricle:Liver:Spleen:GM12878:IMR90:Mesenchymal_Stem_Cell:Mesendoderm:Neural_Progenitor_Cell:Trophoblast-like_Cell:hESC	2.30376e-20	rs3136441;rs10838620;rs10769254;rs10838681;rs2305280;rs7928842;rs3781627;rs7118178;rs10838760;rs7941758;rs2697920;rs10838620:rs10838681:rs3136441:rs10769254;rs2305280:rs10769254:rs2305280	150
ENSG00000172247	C1QTNF4	11	47611216	47616211	0.679081	NA	19	14.54	816	3.27170000000001e-310	0	eQTLcatalogue/Fairfax_2014_naive:eQTLcatalogue/GENCORD_ge_LCL:eQTLcatalogue/GENCORD_ge_T-cell:eQTLcatalogue/Kasela_2017_T-cell_CD4:eQTLcatalogue/Nedelec_2016_ge_macrophage_Listeria:eQTLcatalogue/Nedelec_2016_ge_macrophage_naive:eQTLcatalogue/Nedelec_2016_ge_macrophage_Salmonella:eQTLcatalogue/TwinsUK_ge_blood:eQTLcatalogue/TwinsUK_ge_fat:eQTLcatalogue/TwinsUK_ge_LCL:eQTLcatalogue/TwinsUK_ge_skin:…	-	Yes	Adult_Cortex:Fetal_Cortex:GM12878:IMR90:Mesenchymal_Stem_Cell:Mesendoderm:Trophoblast-like_Cell:hESC	2.30376e-20	rs7928842;rs3781627;rs7941758;rs7118178;rs10769254;rs10838760;rs10838681;rs3136441;rs2305280;rs2697920;rs10838681:rs7941758:rs7928842;rs3781627:rs7118178:rs10838760:rs10769254:rs10769254;rs2305280:rs2305280:rs10838620:rs2697920	150
ENSG00000149187	CELF1	11	47487496	47587121	0.998617	-0.376216	70	20.9	437	7.28118e-19	3.64059e-15	eQTLcatalogue/Quach_2016_ge_monocyte_LPS:eQTLcatalogue/Quach_2016_ge_monocyte_Pam3CSK4:eQTLcatalogue/Quach_2016_ge_monocyte_R848:PsychENCODE_eQTLs:eQTLGen_cis_eQTLs:BIOSQTL/BIOS_eQTL_geneLevel:GTEx/v8/Whole_Blood:GTEx/v8/Artery_Aorta:GTEx/v8/Artery_Tibial:GTEx/v8/Esophagus_Gastroesophageal_Junction:GTEx/v8/Lung:GTEx/v8/Nerve_Tibial:GTEx/v8/Cells_Cultured_fibroblasts:GTEx/v8/Thyroid	+	Yes	Promoter_anchored_loops:Liver:GM12878:IMR90:Mesenchymal_Stem_Cell:Mesendoderm:Trophoblast-like_Cell	2.30376e-20	rs7941758;rs10838760;rs7928842;rs3781627;rs7118178;rs10769254;rs2305280;rs10838681;rs3136441;rs7118178:rs10769254:rs10838760:rs7941758:rs7928842	150
ENSG00000196666	FAM180B	11	47608198	47610746	0.315838	NA	14	14.52	614	1.27218e-20	6.3609e-17	eQTLcatalogue/BrainSeq_ge_brain:eQTLcatalogue/TwinsUK_ge_skin:PsychENCODE_eQTLs:GTEx/v8/Adipose_Subcutaneous:GTEx/v8/Brain_Caudate_basal_ganglia:GTEx/v8/Brain_Cerebellar_Hemisphere:GTEx/v8/Brain_Cerebellum:GTEx/v8/Brain_Cortex:GTEx/v8/Brain_Frontal_Cortex_BA9:GTEx/v8/Brain_Nucleus_accumbens_basal_ganglia:GTEx/v8/Brain_Putamen_basal_ganglia:GTEx/v8/Esophagus_Gastroesophageal_Junction:GTEx/v8/Esoph…	+	No	NA	2.30376e-20	rs7118178;rs7928842;rs3781627;rs7941758;rs10769254;rs10838760;rs2305280	150
ENSG00000109920	FNBP4	11	47738072	47788995	0.999993	-0.713792	94	16.01	552	2.4903e-63	0	eQTLcatalogue/BLUEPRINT_ge_neutrophil:eQTLcatalogue/BLUEPRINT_ge_T-cell:eQTLcatalogue/Fairfax_2012_B-cell_CD19:eQTLcatalogue/Nedelec_2016_ge_macrophage_Salmonella:eQTLcatalogue/TwinsUK_ge_fat:PsychENCODE_eQTLs:scRNA_eQTLs/T_CD4:scRNA_eQTLs/PBMC:eQTLGen_cis_eQTLs:BIOSQTL/BIOS_eQTL_geneLevel:GTEx/v8/Whole_Blood:GTEx/v8/Esophagus_Mucosa:GTEx/v8/Muscle_Skeletal:GTEx/v8/Nerve_Tibial:GTEx/v8/Cells_Cult…	+	Yes	Promoter_anchored_loops:EP_correlation_organ_oneway:Left_Ventricle:Liver:GM12878:IMR90:Mesenchymal_Stem_Cell:Mesendoderm:Trophoblast-like_Cell:hESC	2.30376e-20	rs7928842;rs3781627;rs10838760;rs7118178;rs7941758;rs10769254;rs10838620;rs3781627:rs10838760:rs10838620:rs7118178:rs7941758	150
ENSG00000123444	KBTBD4	11	47593749	47600567	0.0180744	-0.492621	17	20.9	65	6.65082e-06	0.00146823	eQTLcatalogue/Quach_2016_ge_monocyte_LPS:eQTLcatalogue/Quach_2016_ge_monocyte_R848:PsychENCODE_eQTLs	+	Yes	EP_links_oneway:Promoter_anchored_loops:Adult_Cortex:Fetal_Cortex:Liver:GM12878:IMR90:Mesenchymal_Stem_Cell:Mesendoderm:Trophoblast-like_Cell:hESC	2.30376e-20	rs10838760;rs7928842;rs3781627;rs7941758;rs7118178;rs10769254;rs10838681;rs2305280;rs3781627:rs10838681:rs10769254:rs7118178:rs7941758:rs10838760:rs3136441:rs10838620:rs10769254;rs2305280:rs2305280:rs2697920	150
ENSG00000134569	LRP4	11	46878419	46940193	0.100209	0.314362	55	19.39	707	1.27588e-37	7.95622e-54	eQTLcatalogue/TwinsUK_ge_fat:PsychENCODE_eQTLs:CMC_SVA_cis:GTEx/v8/Brain_Caudate_basal_ganglia:GTEx/v8/Brain_Nucleus_accumbens_basal_ganglia:GTEx/v8/Brain_Putamen_basal_ganglia:GTEx/v8/Liver:GTEx/v8/Nerve_Tibial:GTEx/v8/Pancreas:GTEx/v8/Cells_Cultured_fibroblasts:GTEx/v8/Spleen:GTEx/v8/Thyroid	-	Yes	EP_links_oneway:Promoter_anchored_loops:Adult_Cortex:Fetal_Cortex:Left_Ventricle:Liver:Spleen:GM12878:IMR90:Mesenchymal_Stem_Cell:Mesendoderm:Neural_Progenitor_Cell:Trophoblast-like_Cell:hESC	2.30376e-20	rs10838620;rs3136441;rs10769254;rs2305280;rs10838681;rs10838760;rs2697920;rs7928842;rs3781627;rs7941758;rs10838620:rs3136441:rs7118178:rs10838681:rs10769254;rs2305280:rs10769254:rs2305280	150
ENSG00000110514	MADD	11	47290712	47351582	0.000901823	-0.37505	90	18.95	598	4.7637e-96	0	eQTLcatalogue/Fairfax_2014_naive:eQTLcatalogue/GENCORD_ge_LCL:eQTLcatalogue/Lepik_2017_ge_blood:eQTLcatalogue/Quach_2016_ge_monocyte_IAV:eQTLcatalogue/Quach_2016_ge_monocyte_LPS:eQTLcatalogue/Quach_2016_ge_monocyte_naive:eQTLcatalogue/Quach_2016_ge_monocyte_Pam3CSK4:eQTLcatalogue/Quach_2016_ge_monocyte_R848:PsychENCODE_eQTLs:eQTLGen_cis_eQTLs:BIOSQTL/BIOS_eQTL_geneLevel:CMC_SVA_cis:BRAINEAC/THAL:…	+	Yes	Promoter_anchored_loops:Adult_Cortex:Fetal_Cortex:Left_Ventricle:Liver:GM12878:IMR90:Mesenchymal_Stem_Cell:Mesendoderm:Trophoblast-like_Cell:hESC	2.30376e-20	rs10769254;rs10838681;rs2305280;rs7118178;rs10838620;rs3136441;rs2697920;rs7928842;rs3781627;rs10838760;rs7941758;rs10838620:rs10838681:rs10769254:rs7118178:rs7928842;rs3781627:rs7941758:rs10838760:rs10769254;rs2305280:rs2305280:rs3136441:rs2697920	150
ENSG00000109919	MTCH2	11	47638867	47664175	0.166788	0.0369336	32	25	638	0	0	eQTLcatalogue/Alasoo_2018_ge_macrophage_IFNg_Salmonella:eQTLcatalogue/BLUEPRINT_ge_T-cell:eQTLcatalogue/BrainSeq_ge_brain:eQTLcatalogue/Fairfax_2014_IFN24:eQTLcatalogue/Fairfax_2014_LPS2:eQTLcatalogue/Fairfax_2014_naive:eQTLcatalogue/Nedelec_2016_ge_macrophage_naive:eQTLcatalogue/Quach_2016_ge_monocyte_IAV:PsychENCODE_eQTLs:eQTLGen_cis_eQTLs:BIOSQTL/BIOS_eQTL_geneLevel:xQTLServer_eQTLs:BRAINEAC/C…	+	Yes	Adult_Cortex:Fetal_Cortex:IMR90:Mesenchymal_Stem_Cell	2.30376e-20	rs7941758;rs7928842;rs3781627;rs10838760;rs7118178;rs10769254;rs2697920;rs10838681;rs2305280;rs10769254:rs7118178:rs7928842;rs3781627:rs7941758:rs10838760	150
ENSG00000134571	MYBPC3	11	47352957	47374253	1.35054e-06	-0.432352	58	15.43	895	3.27170000000001e-310	0	eQTLcatalogue/Alasoo_2018_ge_macrophage_IFNg:eQTLcatalogue/Alasoo_2018_ge_macrophage_naive:eQTLcatalogue/BLUEPRINT_ge_monocyte:eQTLcatalogue/BLUEPRINT_ge_neutrophil:eQTLcatalogue/CEDAR_neutrophil_CD15:eQTLcatalogue/Fairfax_2014_LPS2:eQTLcatalogue/Fairfax_2014_naive:eQTLcatalogue/Lepik_2017_ge_blood:eQTLcatalogue/Naranbhai_2015_neutrophil_CD16:eQTLcatalogue/Nedelec_2016_ge_macrophage_naive:eQTLcat…	+	Yes	Promoter_anchored_loops:EP_correlation_cell_type_oneway:IMR90:Mesenchymal_Stem_Cell:Mesendoderm	2.30376e-20	rs10838681;rs10769254;rs2305280;rs2697920;rs7928842;rs3781627;rs7118178;rs10838760;rs3136441;rs10838620;rs7941758;rs10838620:rs7928842;rs3781627:rs3136441:rs10769254:rs10838681:rs2305280:rs10769254;rs2305280:rs7118178:rs10838760:rs7941758	150
ENSG00000213619	NDUFS3	11	47586888	47606114	0.047137	-0.0123446	23	20.9	541	4.13453e-13	2.74832e-09	eQTLcatalogue/GEUVADIS_ge_LCL:eQTLcatalogue/Quach_2016_ge_monocyte_LPS:eQTLcatalogue/Quach_2016_ge_monocyte_Pam3CSK4:eQTLcatalogue/Quach_2016_ge_monocyte_R848:PsychENCODE_eQTLs:BIOSQTL/BIOS_eQTL_geneLevel:GTEx/v8/Adipose_Subcutaneous:GTEx/v8/Brain_Cerebellar_Hemisphere:GTEx/v8/Brain_Cerebellum:GTEx/v8/Esophagus_Mucosa:GTEx/v8/Heart_Atrial_Appendage:GTEx/v8/Cells_Cultured_fibroblasts:GTEx/v8/Thyro…	+	Yes	Promoter_anchored_loops:Liver:GM12878:IMR90:Mesenchymal_Stem_Cell:Mesendoderm:Trophoblast-like_Cell	2.30376e-20	rs7118178;rs7928842;rs3781627;rs7941758;rs10838760;rs10769254;rs10838681;rs7118178:rs10769254:rs10838760:rs7941758:rs7928842	150
ENSG00000025434	NR1H3	11	47269851	47290396	0.856186	0.657584	54	23	869	3.27170000000001e-310	0	eQTLcatalogue/BLUEPRINT_ge_monocyte:eQTLcatalogue/BLUEPRINT_ge_neutrophil:eQTLcatalogue/BLUEPRINT_ge_T-cell:eQTLcatalogue/CEDAR_T-cell_CD4:eQTLcatalogue/Fairfax_2012_B-cell_CD19:eQTLcatalogue/Fairfax_2014_naive:eQTLcatalogue/GENCORD_ge_LCL:eQTLcatalogue/GEUVADIS_ge_LCL:eQTLcatalogue/Lepik_2017_ge_blood:eQTLcatalogue/TwinsUK_ge_blood:eQTLcatalogue/TwinsUK_ge_fat:eQTLcatalogue/TwinsUK_ge_LCL:eQTLca…	-	Yes	Promoter_anchored_loops:Adult_Cortex:Fetal_Cortex:Left_Ventricle:GM12878:IMR90:Mesenchymal_Stem_Cell:Mesendoderm:Trophoblast-like_Cell:hESC	2.30376e-20	rs2305280;rs10838681;rs10769254;rs3136441;rs7928842;rs3781627;rs10838760;rs2697920;rs10838620;rs7118178;rs7941758;rs10838620:rs7928842;rs3781627:rs7941758:rs3136441:rs10769254:rs10838681:rs10769254;rs2305280:rs7118178:rs10838760:rs2305280:rs2697920	150
ENSG00000030066	NUP160	11	47799639	47870107	0.0239792	-0.345694	122	16.15	791	1.7265e-55	0	eQTLcatalogue/Alasoo_2018_ge_macrophage_IFNg:eQTLcatalogue/Alasoo_2018_ge_macrophage_naive:eQTLcatalogue/BLUEPRINT_ge_monocyte:eQTLcatalogue/Fairfax_2014_naive:eQTLcatalogue/GEUVADIS_ge_LCL:eQTLcatalogue/HipSci_ge_iPSC:eQTLcatalogue/Nedelec_2016_ge_macrophage_naive:eQTLcatalogue/Quach_2016_ge_monocyte_naive:DICE/B_cell_naive:DICE/Monocyte_classical:DICE/Monocyte_non_classical:eQTLGen_cis_eQTLs:BI…	+	Yes	Promoter_anchored_loops:Adult_Cortex:Fetal_Cortex:GM12878:IMR90:Mesenchymal_Stem_Cell:Mesendoderm:Trophoblast-like_Cell:hESC	2.30376e-20	rs10838760;rs7941758;rs7928842;rs3781627;rs7118178;rs10769254;rs10838620;rs3136441;rs2305280;rs2697920;rs10838760:rs7941758:rs7928842;rs3781627:rs7118178:rs10769254:rs10838620:rs10838681:rs10769254;rs2305280:rs2305280	150
ENSG00000165916	PSMC3	11	47440320	47447993	0.9792	-0.404697	39	14.02	611	5.9835e-40	0	eQTLcatalogue/BLUEPRINT_ge_monocyte:eQTLcatalogue/Fairfax_2014_naive:eQTLcatalogue/Quach_2016_ge_monocyte_LPS:eQTLcatalogue/Quach_2016_ge_monocyte_naive:eQTLcatalogue/Quach_2016_ge_monocyte_Pam3CSK4:PsychENCODE_eQTLs:eQTLGen_cis_eQTLs:BIOSQTL/BIOS_eQTL_geneLevel:CMC_SVA_cis:GTEx/v8/Adipose_Subcutaneous:GTEx/v8/Adipose_Visceral_Omentum:GTEx/v8/Adrenal_Gland:GTEx/v8/Artery_Aorta:GTEx/v8/Artery_Tibi…	+	Yes	Promoter_anchored_loops:IMR90:Mesenchymal_Stem_Cell	2.30376e-20	rs7928842;rs3781627;rs7118178;rs7941758;rs10769254;rs10838760;rs10838620;rs10838681;rs3136441;rs2305280;rs2697920;rs10838681:rs10769254:rs2305280:rs7928842;rs3781627:rs7118178:rs10838760:rs7941758	150
ENSG00000110536	PTPMT1	11	47586982	47595013	0.459152	NA	14	20.9	672	2.2247e-27	0	eQTLcatalogue/Fairfax_2014_LPS2:eQTLcatalogue/Fairfax_2014_naive:eQTLcatalogue/Quach_2016_ge_monocyte_LPS:eQTLcatalogue/Quach_2016_ge_monocyte_Pam3CSK4:eQTLcatalogue/Quach_2016_ge_monocyte_R848:PsychENCODE_eQTLs:DICE/B_cell_naive:eQTLGen_cis_eQTLs:BIOSQTL/BIOS_eQTL_geneLevel:BRAINEAC/OCTX:GTEx/v8/Adipose_Subcutaneous:GTEx/v8/Artery_Coronary:GTEx/v8/Artery_Tibial:GTEx/v8/Colon_Sigmoid:GTEx/v8/Colo…	+	Yes	Promoter_anchored_loops:Liver:GM12878:IMR90:Mesenchymal_Stem_Cell:Mesendoderm:Trophoblast-like_Cell	2.30376e-20	rs7118178;rs7928842;rs3781627;rs7941758;rs10838760;rs10769254;rs2305280;rs3136441;rs10838620;rs10838681;rs7118178:rs10769254:rs10838760:rs7941758:rs7928842	150
ENSG00000149177	PTPRJ	11	48002113	48189670	2.38654e-05	NA	17	12.6	717	6.2292e-59	0	eQTLcatalogue/BLUEPRINT_ge_monocyte:eQTLcatalogue/BLUEPRINT_ge_neutrophil:eQTLcatalogue/BLUEPRINT_ge_T-cell:eQTLcatalogue/Lepik_2017_ge_blood:eQTLcatalogue/Quach_2016_ge_monocyte_IAV:eQTLcatalogue/Quach_2016_ge_monocyte_LPS:eQTLcatalogue/Quach_2016_ge_monocyte_Pam3CSK4:PsychENCODE_eQTLs:DICE/Monocyte_non_classical:eQTLGen_cis_eQTLs:BIOSQTL/BIOS_eQTL_geneLevel:CMC_SVA_cis:GTEx/v8/Adipose_Subcutane…	-	Yes	Promoter_anchored_loops:Adult_Cortex:Liver:GM12878:IMR90:Mesenchymal_Stem_Cell:Mesendoderm:Trophoblast-like_Cell:hESC	2.30376e-20	rs7941758;rs2305280;rs10769254;rs7928842;rs3781627;rs3136441;rs10838620;rs10838681;rs2697920;rs7118178;rs10838760;rs7941758:rs10838760:rs7928842;rs3781627:rs7118178	150
ENSG00000165917	RAPSN	11	47459308	47470730	0.0326445	0.0487816	25	10.14	709	6.25851e-22	0	eQTLcatalogue/BLUEPRINT_ge_neutrophil:eQTLcatalogue/Quach_2016_ge_monocyte_LPS:eQTLcatalogue/Quach_2016_ge_monocyte_Pam3CSK4:eQTLcatalogue/Quach_2016_ge_monocyte_R848:PsychENCODE_eQTLs:eQTLGen_cis_eQTLs:BIOSQTL/BIOS_eQTL_geneLevel:GTEx/v8/Adipose_Subcutaneous:GTEx/v8/Adipose_Visceral_Omentum:GTEx/v8/Brain_Caudate_basal_ganglia:GTEx/v8/Brain_Cortex:GTEx/v8/Brain_Frontal_Cortex_BA9:GTEx/v8/Brain_Pu…	-	Yes	Adult_Cortex:IMR90:Mesenchymal_Stem_Cell	2.30376e-20	rs7941758;rs7928842;rs3781627;rs7118178;rs10769254;rs10838760;rs2305280;rs2697920;rs10838681;rs3136441;rs10838620;rs10838620:rs3136441:rs10769254:rs10838681:rs2305280:rs10769254;rs2305280:rs7928842;rs3781627:rs7118178:rs7941758:rs10838760	150
ENSG00000165915	SLC39A13	11	47428683	47438047	0.011852	-0.332419	54	21.7	515	4.13876e-17	0	eQTLcatalogue/Alasoo_2018_ge_macrophage_Salmonella:eQTLcatalogue/BLUEPRINT_ge_T-cell:eQTLcatalogue/Nedelec_2016_ge_macrophage_naive:eQTLcatalogue/Nedelec_2016_ge_macrophage_Salmonella:eQTLcatalogue/Quach_2016_ge_monocyte_IAV:eQTLcatalogue/Quach_2016_ge_monocyte_LPS:eQTLcatalogue/Quach_2016_ge_monocyte_naive:eQTLcatalogue/Quach_2016_ge_monocyte_Pam3CSK4:eQTLcatalogue/Quach_2016_ge_monocyte_R848:Ps…	+	Yes	Promoter_anchored_loops:EP_correlation_cell_type_oneway:Adult_Cortex:Fetal_Cortex:IMR90:Mesenchymal_Stem_Cell	2.30376e-20	rs7118178;rs7928842;rs3781627;rs10769254;rs7941758;rs10838760;rs10838681;rs3781627:rs7118178:rs10838620:rs10769254:rs10838681:rs2305280:rs10769254;rs2305280:rs7941758:rs10838760:rs3136441:rs2697920	150
ENSG00000066336	SPI1	11	47376411	47400127	0.897231	NA	71	14.21	737	8.1761e-94	0	eQTLcatalogue/CEDAR_B-cell_CD19:eQTLcatalogue/CEDAR_monocyte_CD14:eQTLcatalogue/CEDAR_neutrophil_CD15:eQTLcatalogue/Fairfax_2012_B-cell_CD19:eQTLcatalogue/Fairfax_2014_IFN24:eQTLcatalogue/Fairfax_2014_LPS24:eQTLcatalogue/Fairfax_2014_LPS2:eQTLcatalogue/Fairfax_2014_naive:eQTLcatalogue/Naranbhai_2015_neutrophil_CD16:eQTLGen_cis_eQTLs:GTEx/v8/Thyroid	+	Yes	EP_links_oneway:Promoter_anchored_loops:EP_correlation_cell_type_oneway:EP_correlation_organ_oneway:Adult_Cortex:IMR90:Mesenchymal_Stem_Cell:Mesendoderm	2.30376e-20	rs10769254;rs2697920;rs7928842;rs3781627;rs7118178;rs7941758;rs10838760;rs10838681;rs2305280;rs10838620;rs3136441;rs7941758:rs10838620:rs10769254:rs7118178:rs7928842;rs3781627:rs10838681:rs10838760:rs3136441:rs2305280:rs10769254;rs2305280:rs2697920	150
ENSG00000165923	AGBL2	11	47681143	47736941	6.81051e-12	-0.765874	87	14.46	392	5.6938e-17	0	eQTLcatalogue/Quach_2016_ge_monocyte_IAV:PsychENCODE_eQTLs:DICE/T_CD4_TFH:DICE/T_CD4_naive_TREG:eQTLGen_cis_eQTLs:BIOSQTL/BIOS_eQTL_geneLevel:GTEx/v8/Cells_EBV-transformed_lymphocytes:GTEx/v8/Artery_Aorta:GTEx/v8/Colon_Sigmoid:GTEx/v8/Colon_Transverse:GTEx/v8/Esophagus_Mucosa:GTEx/v8/Nerve_Tibial:GTEx/v8/Pituitary:GTEx/v8/Small_Intestine_Terminal_Ileum:GTEx/v8/Thyroid:GTEx/v8/Vagina	-	Yes	Adult_Cortex:Left_Ventricle:Liver:GM12878:IMR90:Mesenchymal_Stem_Cell:Mesendoderm:Trophoblast-like_Cell:hESC	2.6225e-20	rs7941758;rs10838760;rs7928842;rs3781627;rs10769254;rs7118178;rs10838620;rs3136441;rs2305280;rs10838681;rs7941758:rs7928842;rs3781627:rs7118178:rs10769254:rs10838760:rs10838620	150
ENSG00000180423	HARBI1	11	46624411	46639459	0.00570134	-0.629323	0	0	149	9.3224e-10	1.30625e-05	eQTLGen_cis_eQTLs:BIOSQTL/BIOS_eQTL_geneLevel	-	Yes	Promoter_anchored_loops	2.6225e-20	rs10838620;rs7928842;rs3781627;rs7118178;rs10838681:rs10769254:rs2305280	150
ENSG00000231880	KBTBD4	11	47599277	47599823	NA	-0.492621	14	9.124	0	NA	NA	NA	NA	Yes	EP_links_oneway:Adult_Cortex:Fetal_Cortex:Liver:GM12878:IMR90:Mesenchymal_Stem_Cell:Mesendoderm:Trophoblast-like_Cell	2.6225e-20	rs7928842;rs3781627;rs7941758;rs7118178;rs10769254;rs10838760;rs3781627:rs10838681:rs10769254:rs7118178:rs7941758:rs10838760:rs3136441	150
ENSG00000118961	C2orf43	2	20883788	21022882	0.000647485	-0.605069	0	0	8	5.8756e-31	0	eQTLGen_cis_eQTLs:GTEx/v8/Adipose_Visceral_Omentum	+	Yes	Left_Ventricle:Liver:IMR90:Mesenchymal_Stem_Cell:Mesendoderm:Trophoblast-like_Cell:hESC	5.88397e-20	rs13392272;rs1042034	27
ENSG00000143869	GDF7	2	20866424	20873418	0.778067	0.171954	0	0	3	2.95229e-06	1.25923e-07	GTEx/v8/Esophagus_Muscularis	+	Yes	Liver:GM12878:IMR90:Mesenchymal_Stem_Cell:Mesendoderm:Trophoblast-like_Cell:hESC	5.88397e-20	rs13392272;rs1042034	27
ENSG00000118960	HS1BP3	2	20760208	20850849	0.000353325	2.11433	0	0	0	NA	NA	NA	NA	Yes	Liver:GM12878:IMR90:Mesenchymal_Stem_Cell:Mesendoderm:Trophoblast-like_Cell:hESC	5.88397e-20	rs1042034	27
ENSG00000119771	KLHL29	2	23608088	23931481	NA	-0.399832	0	0	0	NA	NA	NA	NA	Yes	IMR90:Mesenchymal_Stem_Cell	5.88397e-20	rs1042034	27
ENSG00000055917	PUM2	2	20448452	20551995	0.999923	-1.03263	0	0	0	NA	NA	NA	NA	Yes	Mesendoderm:Trophoblast-like_Cell	5.88397e-20	rs1042034	27
ENSG00000240857	RDH14	2	18735989	18741946	0.232943	-0.659488	0	0	0	NA	NA	NA	NA	Yes	IMR90:hESC	5.88397e-20	rs1042034	27
ENSG00000143878	RHOB	2	20646835	20649200	0.245031	-0.338453	0	0	0	NA	NA	NA	NA	Yes	Mesendoderm:Trophoblast-like_Cell	5.88397e-20	rs1042034	27
ENSG00000073711	PPP2R3A	3	135684515	135866733	0.920488	-0.863679	9	8.061	66	2.0058e-07	2.26052e-08	eQTLGen_cis_eQTLs:BIOSQTL/BIOS_eQTL_geneLevel:GTEx/v8/Nerve_Tibial:GTEx/v8/Stomach	-	Yes	IMR90:Mesenchymal_Stem_Cell:Mesendoderm:Trophoblast-like_Cell:hESC	6.32706e-20	rs645040;rs2655008;rs503973;rs11717974;rs13075615;rs7650071:rs6773440	62
ENSG00000145833	DDX46	5	134094469	134190823	0.999998	-0.551107	0	0	2	3.7208e-06	0.0259519	eQTLGen_trans_eQTLs	+	No	NA	6.48676e-20	rs6457796	90
ENSG00000163660	CCNL1	3	156864297	156878549	0.942873	-0.738927	0	0	19	1.4904e-09	1.30634e-05	eQTLGen_cis_eQTLs:BIOSQTL/BIOS_eQTL_geneLevel	-	Yes	Liver:GM12878:IMR90:Mesenchymal_Stem_Cell:Mesendoderm:hESC	6.59582e-20	rs13322435;rs9822326	63
ENSG00000169282	KCNAB1	3	155755490	156256545	0.0665503	-0.389326	0	0	16	3.8337e-06	0.0111098	eQTLGen_cis_eQTLs	+	Yes	Adult_Cortex:Fetal_Cortex:Left_Ventricle:IMR90:Mesenchymal_Stem_Cell:Mesendoderm:Neural_Progenitor_Cell:Trophoblast-like_Cell:hESC	6.59582e-20	rs13322435	63
ENSG00000197980	LEKR1	3	156543270	156763918	NA	-0.0298329	0	0	0	NA	NA	NA	NA	Yes	Adult_Cortex:Aorta:Hippocampus:Left_Ventricle:Liver:Spleen:GM12878:IMR90:Mesenchymal_Stem_Cell:Mesendoderm:Neural_Progenitor_Cell:Trophoblast-like_Cell:hESC	6.59582e-20	rs13322435	63
ENSG00000169359	SLC33A1	3	155538813	155572218	0.100521	-1.12125	0	0	0	NA	NA	NA	NA	Yes	Fetal_Cortex	6.59582e-20	rs13322435	63
ENSG00000114850	SSR3	3	156257929	156272973	0.301906	0.990106	0	0	0	NA	NA	NA	NA	Yes	Adult_Cortex:Fetal_Cortex:Aorta:Left_Ventricle:Liver:GM12878:IMR90:Mesenchymal_Stem_Cell:Mesendoderm:Neural_Progenitor_Cell:Trophoblast-like_Cell:hESC	6.59582e-20	rs13322435	63
ENSG00000163659	TIPARP	3	156391024	156424559	0.997752	-1.24771	0	0	20	1.23646e-53	6.1823e-50	eQTLcatalogue/TwinsUK_ge_fat:GTEx/v8/Adipose_Subcutaneous:GTEx/v8/Adipose_Visceral_Omentum:GTEx/v8/Artery_Tibial	-	Yes	Adult_Cortex:Aorta:Hippocampus:Left_Ventricle:Liver:Pancreas:Right_Ventricle:Spleen:GM12878:IMR90:Mesenchymal_Stem_Cell:Mesendoderm:Neural_Progenitor_Cell:Trophoblast-like_Cell:hESC	6.59582e-20	rs13322435;rs9822326	63
ENSG00000169217	CD2BP2	16	30362087	30366682	0.000336174	-1.35975	1	1.531	64	1.62079e-07	6.34029e-09	eQTLGen_cis_eQTLs:GTEx/v8/Adipose_Subcutaneous:GTEx/v8/Esophagus_Mucosa:GTEx/v8/Liver:GTEx/v8/Nerve_Tibial:GTEx/v8/Pituitary:GTEx/v8/Cells_Cultured_fibroblasts:GTEx/v8/Testis:GTEx/v8/Thyroid	+	Yes	Promoter_anchored_loops:Adult_Cortex:Fetal_Cortex:Left_Ventricle:Liver:Right_Ventricle:GM12878:IMR90:Mesenchymal_Stem_Cell:Mesendoderm:Trophoblast-like_Cell:hESC	9.53996e-20	rs4238961;rs7201780;rs2887799;rs2005219;rs7186852:rs3814883:rs7184567;rs8063565;rs11150596:rs8063565:rs8063565;rs7186852:rs8047664:rs4787480:rs4787491:rs2005219:rs7184567;rs11150596	198
ENSG00000109881	CCDC34	11	27352374	27385415	4.91355e-07	-0.41837	0	0	10	2.8078e-06	0.00819365	eQTLGen_cis_eQTLs	-	Yes	Adult_Cortex:Liver:IMR90:Mesenchymal_Stem_Cell:Mesendoderm:Neural_Progenitor_Cell:Trophoblast-like_Cell:hESC	1.09169e-19	rs4923456;rs12807253;rs6484314:rs4923456:rs11030026:rs4514364:rs12807253:rs6484314;rs4514364:rs1222220:rs6484478	147;148
ENSG00000112033	PPARD	6	35310335	35395968	0.966868	0.253949	0	0	1	0.000307597	0.0117555	GTEx/v8/Thyroid	-	Yes	Promoter_anchored_loops	1.53968e-19	rs12525532;rs6457796	90
ENSG00000139970	RTN1	14	60062694	60337684	0.959599	-0.243476	0	0	6	1.0377e-26	0	eQTLGen_trans_eQTLs	-	No	NA	2.40402e-19	rs3808436;rs10838760;rs7118178;rs7928842;rs3781627	128;150
ENSG00000198795	ZNF521	18	22641890	22932154	0.999979	NA	0	0	0	NA	NA	NA	NA	Yes	Left_Ventricle:IMR90:Mesenchymal_Stem_Cell:Mesendoderm:Trophoblast-like_Cell:hESC	3.52878e-19	rs891387:rs11660335	216;217
ENSG00000169627	BOLA2B	16	30204255	30205627	NA	-0.742931	2	10.71	5	2.23719e-05	0.0141412	BIOSQTL/BIOS_eQTL_geneLevel	+	No	NA	5.00705e-19	rs2887799;rs3814883;rs4787491;rs2005219	198
ENSG00000132207	SLX1A	16	30205208	30208882	0.625454	-0.393538	1	10.71	15	7.01608e-06	0.00490384	DICE/Monocyte_classical:DICE/T_CD4_TH17:BIOSQTL/BIOS_eQTL_geneLevel	+	No	NA	5.00705e-19	rs2887799;rs3814883;rs4787491;rs2005219	198
ENSG00000261052	SULT1A3	16	30205754	30215631	0.372332	-1.23078	1	10.71	16	7.01608e-06	0.00490384	BIOSQTL/BIOS_eQTL_geneLevel:GTEx/v8/Skin_Sun_Exposed_Lower_leg	+	Yes	Promoter_anchored_loops	5.00705e-19	rs2887799;rs3814883;rs4787491;rs2005219;rs7186852;rs4787491:rs2005219:rs2887799:rs2005219;rs4238961	198
ENSG00000164961	KIAA0196	8	126036502	126104082	4.81025e-13	-0.762157	0	0	14	7.70252e-06	0.0111019	GTEx/v8/Skin_Not_Sun_Exposed_Suprapubic	+	Yes	Left_Ventricle:Liver:Pancreas:GM12878:IMR90:Mesenchymal_Stem_Cell:Mesendoderm:Trophoblast-like_Cell:hESC	5.61728e-19	rs4871603;rs10808546:rs4871603	129
ENSG00000136997	MYC	8	128747680	128753674	NA	-0.253125	0	0	0	NA	NA	NA	NA	Yes	Left_Ventricle:IMR90	5.61728e-19	rs10808546:rs4871603	129
ENSG00000147684	NDUFB9	8	125551344	125580751	0.0428894	-0.0165872	0	0	0	NA	NA	NA	NA	Yes	Liver:GM12878	5.61728e-19	rs10808546:rs4871603	129
ENSG00000156831	NSMCE2	8	126103921	126379362	0.0724507	-0.471934	0	0	0	NA	NA	NA	NA	Yes	Left_Ventricle:Liver:Pancreas:GM12878:IMR90:Mesenchymal_Stem_Cell:Mesendoderm:Trophoblast-like_Cell:hESC	5.61728e-19	rs10808546:rs4871603	129
ENSG00000104549	SQLE	8	126010739	126034525	0.912971	1.17169	0	0	28	7.3356e-16	0	eQTLGen_trans_eQTLs	+	Yes	IMR90:Mesenchymal_Stem_Cell:Trophoblast-like_Cell:hESC	5.61728e-19	rs2275543;rs102275;rs10808546:rs4871603	129;133;151
ENSG00000147687	TATDN1	8	125500726	125551699	1.72641e-08	0.357863	0	0	0	NA	NA	NA	NA	Yes	Liver:GM12878	5.61728e-19	rs10808546:rs4871603	129
ENSG00000180938	ZNF572	8	125985540	125991631	0.000651451	-0.137914	0	0	1	9.90349e-05	0.00408065	GTEx/v8/Skin_Sun_Exposed_Lower_leg	NA	Yes	Liver	5.61728e-19	rs10808546;rs10808546:rs4871603	129
ENSG00000198755	RPL10A	6	35436185	35438562	0.302379	-0.217537	0	0	43	1.2881e-14	0	PsychENCODE_eQTLs:eQTLGen_cis_eQTLs:BIOSQTL/BIOS_eQTL_geneLevel:CMC_SVA_cis:GTEx/v8/Esophagus_Gastroesophageal_Junction:GTEx/v8/Lung:GTEx/v8/Muscle_Skeletal:GTEx/v8/Nerve_Tibial	+	No	NA	1.10899e-18	rs2814944;rs2814982;rs12525532;rs3822921;rs7742443;rs11754548	90
ENSG00000101773	RBBP8	18	20378224	20606451	0.000108379	-0.338766	0	0	30	6.1031e-18	0	eQTLGen_cis_eQTLs:BIOSQTL/BIOS_eQTL_geneLevel	+	Yes	Promoter_anchored_loops:GM12878:IMR90:Mesenchymal_Stem_Cell:Mesendoderm:Trophoblast-like_Cell	1.22546e-18	rs4800452;rs11663645;rs11662237;rs7228616;rs11082402:rs11663645;rs11082402:rs11662237:rs11663645;rs11662237:rs4800452:rs11663645;rs7228616:rs11663645:rs1788785:rs891387	216
ENSG00000090861	AARS	16	70286198	70323446	4.67832e-05	NA	0	0	269	2.0005e-26	0	eQTLcatalogue/CEDAR_rectum:PsychENCODE_eQTLs:eQTLGen_cis_eQTLs:GTEx/v8/Brain_Caudate_basal_ganglia:GTEx/v8/Brain_Cerebellum:GTEx/v8/Brain_Putamen_basal_ganglia:GTEx/v8/Brain_Spinal_cord_cervical_c-1:GTEx/v8/Muscle_Skeletal:GTEx/v8/Nerve_Tibial:GTEx/v8/Pituitary:GTEx/v8/Cells_Cultured_fibroblasts	+	Yes	Adult_Cortex:Left_Ventricle	1.52126e-18	rs904810;rs2270842;rs6499240;rs11866219;rs7196917;rs7200764	202
ENSG00000157322	CLEC18A	16	69984810	69998141	0.144114	-0.618371	25	8.631	377	3.27167000000001e-310	0	eQTLcatalogue/BLUEPRINT_ge_neutrophil:eQTLcatalogue/TwinsUK_ge_blood:PsychENCODE_eQTLs:DICE/Monocyte_classical:DICE/Monocyte_non_classical:DICE/T_CD4_TFH:DICE/T_CD4_TH1:DICE/T_CD4_TH1_17:DICE/T_CD4_memory_TREG:eQTLGen_cis_eQTLs:BIOSQTL/BIOS_eQTL_geneLevel:xQTLServer_eQTLs:GTEx/v8/Adipose_Subcutaneous:GTEx/v8/Adipose_Visceral_Omentum:GTEx/v8/Adrenal_Gland:GTEx/v8/Cells_EBV-transformed_lymphocytes:…	-	No	NA	1.52126e-18	rs2270842;rs904810;rs11866219;rs6499240;rs889400;rs7200764;rs7196917	202
ENSG00000157335	CLEC18C	16	70207225	70221264	0.876992	-0.678231	0	0	342	3.27167000000001e-310	0	PsychENCODE_eQTLs:eQTLGen_cis_eQTLs:BIOSQTL/BIOS_eQTL_geneLevel:GTEx/v8/Adrenal_Gland:GTEx/v8/Whole_Blood:GTEx/v8/Artery_Aorta:GTEx/v8/Artery_Coronary:GTEx/v8/Artery_Tibial:GTEx/v8/Brain_Cortex:GTEx/v8/Lung:GTEx/v8/Nerve_Tibial:GTEx/v8/Pituitary:GTEx/v8/Minor_Salivary_Gland:GTEx/v8/Spleen:GTEx/v8/Testis:GTEx/v8/Thyroid	+	No	NA	1.52126e-18	rs904810;rs2270842;rs11866219;rs6499240;rs889400;rs7196917;rs7200764	202
ENSG00000103051	COG4	16	70514471	70557468	4.38858e-06	-0.355868	0	0	308	2.2245e-43	0	eQTLcatalogue/BLUEPRINT_ge_neutrophil:eQTLcatalogue/Fairfax_2014_IFN24:eQTLcatalogue/HipSci_ge_iPSC:PsychENCODE_eQTLs:eQTLGen_cis_eQTLs:CMC_SVA_cis:GTEx/v8/Adipose_Subcutaneous:GTEx/v8/Adipose_Visceral_Omentum:GTEx/v8/Adrenal_Gland:GTEx/v8/Whole_Blood:GTEx/v8/Artery_Aorta:GTEx/v8/Artery_Coronary:GTEx/v8/Artery_Tibial:GTEx/v8/Brain_Cortex:GTEx/v8/Brain_Frontal_Cortex_BA9:GTEx/v8/Brain_Hippocampus:…	-	Yes	Adult_Cortex:Fetal_Cortex	1.52126e-18	rs7196917;rs904810;rs6499240;rs11866219;rs2270842;rs889400;rs7200764:rs7196917:rs6499240	202
ENSG00000223496	EXOSC6	16	70284134	70285833	0.494174	-0.495643	0	0	354	3.27170000000001e-310	0	eQTLcatalogue/Alasoo_2018_ge_macrophage_IFNg_Salmonella:eQTLcatalogue/Alasoo_2018_ge_macrophage_IFNg:eQTLcatalogue/Alasoo_2018_ge_macrophage_naive:eQTLcatalogue/Alasoo_2018_ge_macrophage_Salmonella:eQTLcatalogue/BLUEPRINT_ge_monocyte:eQTLcatalogue/BLUEPRINT_ge_neutrophil:eQTLcatalogue/BLUEPRINT_ge_T-cell:eQTLcatalogue/BrainSeq_ge_brain:eQTLcatalogue/CEDAR_monocyte_CD14:eQTLcatalogue/CEDAR_neutrop…	-	No	NA	1.52126e-18	rs904810;rs2270842;rs6499240;rs11866219;rs889400;rs7200764;rs7196917	202
ENSG00000157368	IL34	16	70613798	70694585	0.114216	0.46409	0	0	80	5.00614e-06	0.00133278	GTEx/v8/Skin_Sun_Exposed_Lower_leg	+	No	NA	1.52126e-18	rs6499240;rs11866219;rs904810;rs2270842	202
ENSG00000102908	NFAT5	16	69598997	69738569	0.999991	-0.852026	45	15.6	341	4.72131e-23	0	eQTLGen_cis_eQTLs:BIOSQTL/BIOS_eQTL_geneLevel:GTEx/v8/Whole_Blood:GTEx/v8/Nerve_Tibial:GTEx/v8/Cells_Cultured_fibroblasts:GTEx/v8/Skin_Sun_Exposed_Lower_leg:GTEx/v8/Thyroid	+	Yes	EP_correlation_cell_type_oneway:Adult_Cortex:Fetal_Cortex:Left_Ventricle:Liver:GM12878:IMR90:Mesenchymal_Stem_Cell:Mesendoderm:Trophoblast-like_Cell:hESC	1.52126e-18	rs7200764;rs6499240;rs11866219;rs7196917;rs889400;rs904810;rs2270842;rs889400:rs11866219:rs7200764:rs6499240:rs6499240;rs11866219:rs7196917:rs11866219	202
ENSG00000141101	NOB1	16	69775770	69788843	8.61136e-08	-0.798436	9	15.75	268	4.71686e-14	7.11169e-12	PsychENCODE_eQTLs:eQTLGen_cis_eQTLs:BIOSQTL/BIOS_eQTL_geneLevel:xQTLServer_eQTLs:CMC_SVA_cis:GTEx/v8/Artery_Tibial:GTEx/v8/Brain_Anterior_cingulate_cortex_BA24:GTEx/v8/Brain_Caudate_basal_ganglia:GTEx/v8/Brain_Cerebellar_Hemisphere:GTEx/v8/Brain_Cerebellum:GTEx/v8/Brain_Cortex:GTEx/v8/Esophagus_Gastroesophageal_Junction:GTEx/v8/Esophagus_Mucosa:GTEx/v8/Heart_Atrial_Appendage:GTEx/v8/Liver:GTEx/v8…	-	Yes	Adult_Cortex:Fetal_Cortex:Left_Ventricle:Liver:GM12878:IMR90:Mesenchymal_Stem_Cell:Mesendoderm:hESC	1.52126e-18	rs6499240;rs7200764;rs11866219;rs7196917;rs904810;rs2270842;rs7201742:rs7198357;rs7201742:rs11866219:rs7200764:rs7196917:rs6499240:rs889400:rs6499240;rs11866219:rs11866219;rs7196917:rs904810:rs904810	201;202
ENSG00000181019	NQO1	16	69740899	69760854	4.52405e-11	-0.846834	12	15.6	319	3.9332e-61	0	eQTLcatalogue/BLUEPRINT_ge_monocyte:eQTLcatalogue/BrainSeq_ge_brain:eQTLcatalogue/CEDAR_monocyte_CD14:eQTLcatalogue/Fairfax_2014_naive:eQTLcatalogue/Lepik_2017_ge_blood:eQTLcatalogue/Quach_2016_ge_monocyte_LPS:PsychENCODE_eQTLs:eQTLGen_cis_eQTLs:BIOSQTL/BIOS_eQTL_geneLevel:GTEx/v8/Artery_Tibial:GTEx/v8/Brain_Nucleus_accumbens_basal_ganglia:GTEx/v8/Esophagus_Muscularis:GTEx/v8/Testis	+	Yes	Promoter_anchored_loops:Adult_Cortex:Fetal_Cortex:Left_Ventricle:Liver:GM12878:IMR90:Mesenchymal_Stem_Cell:Mesendoderm:Trophoblast-like_Cell:hESC	1.52126e-18	rs6499240;rs11866219;rs7200764;rs889400;rs7196917;rs904810;rs2270842;rs7200764:rs7196917:rs6499240:rs11866219:rs889400:rs6499240;rs11866219:rs11866219;rs7196917:rs904810:rs904810	202
ENSG00000198373	WWP2	16	69796209	69975644	0.977902	0.163311	215	21.6	390	1.7475e-63	0	eQTLcatalogue/CEDAR_B-cell_CD19:eQTLcatalogue/CEDAR_T-cell_CD4:eQTLcatalogue/CEDAR_T-cell_CD8:eQTLcatalogue/Fairfax_2014_IFN24:eQTLcatalogue/Fairfax_2014_naive:eQTLcatalogue/GEUVADIS_ge_LCL:eQTLcatalogue/Lepik_2017_ge_blood:eQTLcatalogue/Quach_2016_ge_monocyte_IAV:eQTLcatalogue/Quach_2016_ge_monocyte_R848:eQTLcatalogue/TwinsUK_ge_fat:eQTLGen_cis_eQTLs:BIOSQTL/BIOS_eQTL_geneLevel:CMC_SVA_cis:GTEx/…	+	Yes	Adult_Cortex:Fetal_Cortex:Left_Ventricle:Liver:GM12878:IMR90:Mesenchymal_Stem_Cell:Mesendoderm:hESC	1.52126e-18	rs7200764;rs6499240;rs7196917;rs11866219;rs904810;rs2270842;rs889400;rs11866219:rs7200764:rs7196917:rs6499240:rs889400:rs6499240;rs11866219:rs11866219;rs7196917:rs904810:rs904810	202
ENSG00000174574	AKIRIN1	1	39456895	39471731	0.672016	-0.504509	0	0	3	6.04301e-05	1.4346e-31	GTEx/v8/Cells_Cultured_fibroblasts:GTEx/v8/Skin_Not_Sun_Exposed_Suprapubic	+	Yes	Adult_Cortex:Left_Ventricle:GM12878:IMR90:Mesenchymal_Stem_Cell:Mesendoderm:Trophoblast-like_Cell:hESC	2.84445e-18	rs4660208;rs2695319;rs4660208:rs11205802:rs4660208;rs11205802:rs11206430:rs2695319:rs4660808	7
ENSG00000183682	BMP8A	1	39957318	39991607	0.456963	NA	27	20.4	407	2.72699e-76	0	eQTLcatalogue/Alasoo_2018_ge_macrophage_Salmonella:eQTLcatalogue/GENCORD_ge_LCL:eQTLcatalogue/GEUVADIS_ge_LCL:eQTLcatalogue/HipSci_ge_iPSC:eQTLcatalogue/Quach_2016_ge_monocyte_naive:eQTLcatalogue/Quach_2016_ge_monocyte_Pam3CSK4:eQTLcatalogue/Schwartzentruber_2018_ge_sensory_neuron:eQTLcatalogue/TwinsUK_ge_fat:eQTLcatalogue/TwinsUK_ge_LCL:eQTLcatalogue/TwinsUK_ge_skin:PsychENCODE_eQTLs:eQTLGen_cis…	+	Yes	Adult_Cortex:Aorta:Left_Ventricle:Liver:Right_Ventricle:GM12878:IMR90:Mesenchymal_Stem_Cell:Mesendoderm:Neural_Progenitor_Cell:Trophoblast-like_Cell:hESC	2.84445e-18	rs11205802;rs11206430;rs4660808;rs4660208;rs2695319;rs7546735;rs11205802:rs4660208:rs4660208;rs11205802:rs2695319:rs4660808:rs11206430	7
ENSG00000134697	GNL2	1	38032417	38061536	0.453032	0.270727	0	0	0	NA	NA	NA	NA	Yes	Mesendoderm:hESC	2.84445e-18	rs4660208:rs4660208;rs11205802:rs11205802	7
ENSG00000163909	HEYL	1	40089825	40105617	6.80881e-07	-0.347854	7	5.348	2	3.48748e-06	1.21017e-16	GTEx/v8/Muscle_Skeletal	+	Yes	Adult_Cortex:Liver:Lung:Pancreas:Right_Ventricle:Spleen:GM12878:IMR90:Mesenchymal_Stem_Cell:Mesendoderm:Trophoblast-like_Cell:hESC	2.84445e-18	rs11206430;rs2695319;rs4660808;rs11205802:rs4660208:rs4660208;rs11205802:rs11206430:rs2695319:rs4660808	7
ENSG00000116983	HPCAL4	1	40144320	40157361	0.0184228	2.62482	0	0	348	5.7032e-135	0	eQTLcatalogue/CEDAR_T-cell_CD4:eQTLcatalogue/Lepik_2017_ge_blood:PsychENCODE_eQTLs:eQTLGen_cis_eQTLs:BIOSQTL/BIOS_eQTL_geneLevel:GTEx/v8/Whole_Blood:GTEx/v8/Lung	-	Yes	Aorta:Left_Ventricle:Liver:Lung:Pancreas:Spleen:GM12878:IMR90:Mesenchymal_Stem_Cell:Mesendoderm:Neural_Progenitor_Cell:Trophoblast-like_Cell:hESC	2.84445e-18	rs2695319;rs4660208;rs4660808;rs11206430;rs11205802;rs11206430:rs4660208:rs11205802:rs4660208;rs11205802:rs2695319:rs4660808	7
ENSG00000255103	KIAA0754	1	39876151	39882154	0.0210361	NA	18	14.68	14	1.55218e-06	0.049	DICE/T_CD4_TH1	+	Yes	Promoter_anchored_loops:Aorta:Left_Ventricle:Liver:Lung:Psoas:GM12878:IMR90:Mesenchymal_Stem_Cell:Mesendoderm:Trophoblast-like_Cell:hESC	2.84445e-18	rs4660208;rs11205802;rs11206430;rs4660208:rs4660208;rs11205802:rs2695319:rs11205802:rs11206430:rs4660808	7
ENSG00000127603	MACF1	1	39546988	39952849	1	-0.44543	299	19.78	376	3.27170000000001e-310	0	eQTLcatalogue/BLUEPRINT_ge_T-cell:eQTLcatalogue/Fairfax_2012_B-cell_CD19:eQTLcatalogue/Kasela_2017_T-cell_CD4:eQTLcatalogue/Kasela_2017_T-cell_CD8:eQTLcatalogue/TwinsUK_ge_fat:PsychENCODE_eQTLs:DICE/T_CD4_naive:DICE/T_CD4_naive_activated:DICE/T_CD8_naive:DICE/T_CD8_naive_activated:DICE/Monocyte_classical:DICE/Monocyte_non_classical:eQTLGen_cis_eQTLs:BIOSQTL/BIOS_eQTL_geneLevel:GTEx/v8/Esophagus_M…	+	Yes	Adult_Cortex:Fetal_Cortex:Aorta:Left_Ventricle:Liver:Spleen:GM12878:IMR90:Mesenchymal_Stem_Cell:Mesendoderm:Trophoblast-like_Cell:hESC	2.84445e-18	rs7546735;rs4660208;rs11205802;rs4660808;rs11206430;rs2695319;rs11205802:rs4660208:rs2695319:rs4660808:rs11206430	7
ENSG00000168653	NDUFS5	1	39491990	39500308	0.0982173	-0.0686821	0	0	259	5.8794e-25	0	PsychENCODE_eQTLs:eQTLGen_cis_eQTLs:CMC_SVA_cis:GTEx/v8/Artery_Tibial:GTEx/v8/Stomach:GTEx/v8/Thyroid	+	Yes	Adult_Cortex:Fetal_Cortex:Left_Ventricle:GM12878:IMR90:Mesenchymal_Stem_Cell:Mesendoderm:Trophoblast-like_Cell:hESC	2.84445e-18	rs4660208;rs7546735;rs11205802;rs4660808;rs11206430;rs2695319;rs4660208:rs11205802:rs4660208;rs11205802:rs2695319:rs4660808:rs11206430	7
ENSG00000116981	NT5C1A	1	40124793	40137710	8.15239e-05	-0.103966	0	0	2	NA	0.049	CMC_SVA_cis	NA	Yes	Aorta:Left_Ventricle:Liver:Lung:Pancreas:Spleen:GM12878:IMR90:Mesenchymal_Stem_Cell:Mesendoderm:Neural_Progenitor_Cell:Trophoblast-like_Cell:hESC	2.84445e-18	rs4660808;rs11206430:rs4660208:rs11205802:rs4660208;rs11205802:rs2695319:rs4660808	7
ENSG00000198754	OXCT2	1	40235195	40237020	NA	NA	0	0	207	1.50935e-11	2.74687e-22	PsychENCODE_eQTLs:GTEx/v8/Adipose_Subcutaneous:GTEx/v8/Artery_Coronary:GTEx/v8/Artery_Tibial:GTEx/v8/Esophagus_Mucosa:GTEx/v8/Esophagus_Muscularis:GTEx/v8/Heart_Atrial_Appendage:GTEx/v8/Heart_Left_Ventricle:GTEx/v8/Cells_Cultured_fibroblasts:GTEx/v8/Stomach:GTEx/v8/Testis:GTEx/v8/Thyroid	+	Yes	Bladder:Left_Ventricle:Liver:Spleen:GM12878:IMR90:Mesenchymal_Stem_Cell:Mesendoderm:Trophoblast-like_Cell:hESC	2.84445e-18	rs2695319;rs11206430;rs7546735;rs4660208;rs4660808;rs11205802;rs2695319:rs11206430:rs11205802:rs4660208:rs4660808	7
ENSG00000090621	PABPC4	1	40026488	40042462	0.992493	NA	45	20.9	400	1.273e-107	0	eQTLcatalogue/BLUEPRINT_ge_T-cell:eQTLcatalogue/CEDAR_T-cell_CD4:eQTLcatalogue/CEDAR_T-cell_CD8:eQTLcatalogue/Fairfax_2012_B-cell_CD19:eQTLcatalogue/Fairfax_2014_IFN24:eQTLcatalogue/GENCORD_ge_fibroblast:eQTLcatalogue/GENCORD_ge_LCL:eQTLcatalogue/GENCORD_ge_T-cell:eQTLcatalogue/GEUVADIS_ge_LCL:eQTLcatalogue/Kasela_2017_T-cell_CD4:eQTLcatalogue/Lepik_2017_ge_blood:eQTLcatalogue/TwinsUK_ge_fat:eQTL…	-	Yes	Adult_Cortex:Fetal_Cortex:Aorta:Left_Ventricle:Liver:Spleen:GM12878:IMR90:Mesenchymal_Stem_Cell:Mesendoderm:Trophoblast-like_Cell:hESC	2.84445e-18	rs4660808;rs2695319;rs11206430;rs4660208;rs11205802;rs7546735;rs4660208:rs4660208;rs11205802:rs11205802:rs2695319:rs11206430:rs4660808	7
ENSG00000185668	POU3F1	1	38509523	38512450	NA	NA	0	0	0	NA	NA	NA	NA	Yes	Left_Ventricle:GM12878:Mesendoderm:Trophoblast-like_Cell:hESC	2.84445e-18	rs4660208:rs4660208;rs11205802:rs11205802:rs11206430	7
ENSG00000084072	PPIE	1	40157854	40229586	0.98081	-0.248899	0	0	173	3.4987e-32	0	eQTLcatalogue/TwinsUK_ge_LCL:eQTLGen_cis_eQTLs:BIOSQTL/BIOS_eQTL_geneLevel:xQTLServer_eQTLs:GTEx/v8/Esophagus_Mucosa	-	Yes	Aorta:Left_Ventricle:Liver:Lung:Pancreas:Spleen:GM12878:IMR90:Mesenchymal_Stem_Cell:Mesendoderm:Neural_Progenitor_Cell:Trophoblast-like_Cell:hESC	2.84445e-18	rs4660208;rs11205802;rs11206430;rs2695319;rs4660808;rs11206430:rs4660208:rs11205802:rs4660208;rs11205802:rs2695319:rs4660808	7
ENSG00000117000	RLF	1	40627045	40706593	1	-0.364226	0	0	0	NA	NA	NA	NA	Yes	Left_Ventricle	2.84445e-18	rs4660208:rs11205802	7
ENSG00000116954	RRAGC	1	39303870	39325495	0.600078	0.00137479	0	0	0	NA	NA	NA	NA	Yes	Adult_Cortex:Fetal_Cortex:Left_Ventricle:Liver:GM12878:IMR90:Mesenchymal_Stem_Cell:Mesendoderm:Trophoblast-like_Cell:hESC	2.84445e-18	rs4660208:rs11205802:rs4660208;rs11205802:rs2695319:rs4660808:rs11206430	7
ENSG00000119866	BCL11A	2	60678302	60780702	0.829	-2.0339	0	0	2	6.9334e-10	2.04123e-05	eQTLGen_trans_eQTLs	+	Yes	Hippocampus:Left_Ventricle:Liver:GM12878:IMR90:Mesenchymal_Stem_Cell:Mesendoderm:Neural_Progenitor_Cell:Trophoblast-like_Cell:hESC	3.14581e-18	rs6754311;rs11125757:rs12612428:rs6545700:rs42829:rs6545714:rs17615638:rs13011109:rs4672255	33;37
ENSG00000115421	PAPOLG	2	60983365	61029220	0.989888	-0.98637	0	0	0	NA	NA	NA	NA	Yes	Left_Ventricle:IMR90:Mesenchymal_Stem_Cell:Mesendoderm:Trophoblast-like_Cell	3.14581e-18	rs17615638:rs13011109:rs4672255:rs6545714:rs11125757:rs12612428:rs6545700:rs42829	33
ENSG00000028116	VRK2	2	58134786	58387055	1.21621e-08	-0.188348	0	0	164	1.9652e-31	0	eQTLGen_cis_eQTLs:GTEx/v8/Adipose_Visceral_Omentum:GTEx/v8/Artery_Tibial:GTEx/v8/Nerve_Tibial	-	Yes	Fetal_Cortex:Aorta:Left_Ventricle:Liver:Right_Ventricle:Spleen:GM12878:IMR90:Mesenchymal_Stem_Cell:Mesendoderm:Neural_Progenitor_Cell:Trophoblast-like_Cell:hESC	3.14581e-18	rs12612428;rs11125757;rs7569678;rs17615638;rs7584990;rs17615638:rs13011109:rs4672255:rs11125757:rs12612428:rs42829:rs6545714:rs6545700	33
ENSG00000255833	TIFAB	5	134779908	134788089	1.15428e-06	2.25724	0	0	4	1.753e-20	0	eQTLGen_trans_eQTLs	-	No	NA	3.68124e-18	rs6754311;rs6499240;rs2270842	37;202
ENSG00000168802	CHTF8	16	69151913	69166487	0.275817	-0.491897	0	0	0	NA	NA	NA	NA	Yes	Adult_Cortex:Left_Ventricle:Liver:Right_Ventricle:GM12878:IMR90:Mesenchymal_Stem_Cell:Mesendoderm:Trophoblast-like_Cell:hESC	3.68124e-18	rs2863973:rs7200764:rs6499240:rs889400:rs6499240;rs11866219:rs11866219	201;202
ENSG00000141076	CIRH1A	16	69165194	69265033	0.0940277	NA	0	0	8	5.9997e-06	0.0170951	eQTLGen_cis_eQTLs	+	Yes	Adult_Cortex:Left_Ventricle:Liver:Right_Ventricle:GM12878:IMR90:Mesenchymal_Stem_Cell:Mesendoderm:Trophoblast-like_Cell:hESC	3.68124e-18	rs7198357;rs7201742;rs2863973:rs7200764:rs6499240:rs889400:rs6499240;rs11866219:rs11866219	201;202
ENSG00000213380	COG8	16	69354043	69373570	1.87304e-05	-0.173605	0	0	1	0.000500459	0.0330726	PsychENCODE_eQTLs	NA	Yes	Left_Ventricle:Liver:GM12878:IMR90:Mesenchymal_Stem_Cell:Mesendoderm:Trophoblast-like_Cell:hESC	3.68124e-18	rs904810;rs7200764:rs7201742:rs7198357;rs7201742:rs6499240:rs889400:rs6499240;rs11866219:rs11866219:rs7196917	201;202
ENSG00000103018	CYB5B	16	69458428	69500169	0.259578	0.0505453	0	0	11	4.3492e-07	0.00138408	eQTLGen_cis_eQTLs	+	Yes	Adult_Cortex:Left_Ventricle:Liver:Right_Ventricle:GM12878:IMR90:Mesenchymal_Stem_Cell:Mesendoderm:Trophoblast-like_Cell:hESC	3.68124e-18	rs11866219;rs6499240;rs7196917;rs7200764:rs6499240:rs889400:rs6499240;rs11866219:rs11866219:rs7196917:rs904810:rs904810;rs2270842	202
ENSG00000132603	NIP7	16	69373333	69377014	0.603152	1.12924	0	0	0	NA	NA	NA	NA	Yes	Left_Ventricle:Liver:GM12878:IMR90:Mesenchymal_Stem_Cell:Mesendoderm:Trophoblast-like_Cell:hESC	3.68124e-18	rs7200764:rs7201742:rs7198357;rs7201742:rs6499240:rs889400:rs6499240;rs11866219:rs11866219:rs7196917	201;202
ENSG00000258429	PDF	16	69362524	69364498	0.0503154	-0.0409593	0	0	4	9.44043e-05	1.44746e-12	PsychENCODE_eQTLs:GTEx/v8/Adipose_Subcutaneous	NA	Yes	Left_Ventricle:Liver:GM12878:IMR90:Mesenchymal_Stem_Cell:Mesendoderm:Trophoblast-like_Cell:hESC	3.68124e-18	rs7196917;rs889400;rs7200764:rs7201742:rs7198357;rs7201742:rs6499240:rs889400:rs6499240;rs11866219:rs11866219:rs7196917	201;202
ENSG00000259900	RP11-343C2.7	16	69369179	69385633	NA	NA	0	0	0	NA	NA	NA	NA	Yes	Left_Ventricle:Liver:GM12878:IMR90:Mesenchymal_Stem_Cell:Mesendoderm:Trophoblast-like_Cell:hESC	3.68124e-18	rs7200764:rs7201742:rs7198357;rs7201742:rs6499240:rs889400:rs6499240;rs11866219:rs11866219:rs7196917	201;202
ENSG00000157315	TMED6	16	69377151	69385712	0.000563599	-0.289729	0	0	238	3.6877e-20	0	DICE/T_CD4_memory_TREG:eQTLGen_cis_eQTLs:GTEx/v8/Whole_Blood	+	Yes	Left_Ventricle:Liver:GM12878:IMR90:Mesenchymal_Stem_Cell:Mesendoderm:Trophoblast-like_Cell:hESC	3.68124e-18	rs7196917;rs11866219;rs7200764;rs6499240;rs904810;rs2270842;rs7200764:rs7201742:rs7198357;rs7201742:rs6499240:rs889400:rs6499240;rs11866219:rs11866219:rs7196917	201;202
ENSG00000103591	AAGAB	15	67493371	67547533	0.00810207	0.196795	0	0	149	8.3441e-163	0	eQTLcatalogue/CEDAR_B-cell_CD19:eQTLcatalogue/CEDAR_ileum:eQTLcatalogue/CEDAR_neutrophil_CD15:eQTLcatalogue/CEDAR_T-cell_CD4:eQTLcatalogue/CEDAR_T-cell_CD8:eQTLcatalogue/CEDAR_transverse_colon:eQTLcatalogue/Fairfax_2012_B-cell_CD19:eQTLcatalogue/Fairfax_2014_IFN24:eQTLcatalogue/Fairfax_2014_LPS24:eQTLcatalogue/Fairfax_2014_LPS2:eQTLcatalogue/Fairfax_2014_naive:eQTLcatalogue/Kasela_2017_T-cell_CD4…	-	Yes	Fetal_Cortex:Liver:IMR90:Mesenchymal_Stem_Cell:Mesendoderm:Trophoblast-like_Cell:hESC	3.72302e-18	rs11632574;rs4261477;rs8025526;rs938875;rs4776361;rs4776981;rs11632574:rs4776981;rs4776361:rs4776981:rs8025526:rs4261477:rs938875;rs8025526:rs4261477;rs8025526:rs4776361:rs938875;rs11632574:rs938875	186
ENSG00000189227	C15orf61	15	67813406	67819628	NA	-0.166716	12	14.78	177	1.539e-39	0	eQTLcatalogue/Fairfax_2014_IFN24:eQTLcatalogue/Fairfax_2014_naive:eQTLcatalogue/Nedelec_2016_ge_macrophage_naive:DICE/T_CD4_TFH:eQTLGen_cis_eQTLs:CMC_SVA_cis:GTEx/v8/Adipose_Subcutaneous:GTEx/v8/Artery_Aorta:GTEx/v8/Brain_Cerebellar_Hemisphere:GTEx/v8/Brain_Cerebellum:GTEx/v8/Muscle_Skeletal:GTEx/v8/Nerve_Tibial:GTEx/v8/Pituitary:GTEx/v8/Cells_Cultured_fibroblasts:GTEx/v8/Skin_Not_Sun_Exposed_Sup…	-	Yes	Promoter_anchored_loops:Adult_Cortex:Fetal_Cortex:Aorta:Left_Ventricle:Liver:Spleen:GM12878:IMR90:Mesenchymal_Stem_Cell:Mesendoderm:Neural_Progenitor_Cell:Trophoblast-like_Cell:hESC	3.72302e-18	rs11632574;rs4776981;rs4776361;rs4261477;rs938875;rs8025526;rs4776981:rs4776981;rs4776361:rs4261477;rs8025526:rs4261477:rs11632574:rs938875;rs11632574:rs938875;rs11632574:rs938875:rs8025526:rs938875;rs8025526:rs4776361	186
ENSG00000129007	CALML4	15	68483043	68498417	0.0102091	-0.263958	0	0	171	2.3148e-21	0	eQTLcatalogue/Fairfax_2014_LPS24:eQTLGen_cis_eQTLs	+	No	NA	3.72302e-18	rs4776981;rs4776361;rs11632574;rs938875;rs4261477;rs8025526	186
ENSG00000128973	CLN6	15	68499330	68549549	0.381706	-0.208506	0	0	175	6.3547e-39	0	DICE/T_CD4_memory_TREG:eQTLGen_cis_eQTLs	+	No	NA	3.72302e-18	rs4261477;rs4776361;rs11632574;rs4776981;rs938875;rs8025526	186
ENSG00000103599	IQCH	15	67547138	67794598	2.69347e-12	-1.05315	17	14.34	202	5.16591e-17	1.7656e-24	eQTLcatalogue/HipSci_ge_iPSC:PsychENCODE_eQTLs:DICE/T_CD4_TH2:BIOSQTL/BIOS_eQTL_geneLevel:CMC_SVA_cis:CMC_NoSVA_cis:GTEx/v8/Adipose_Subcutaneous:GTEx/v8/Artery_Aorta:GTEx/v8/Artery_Tibial:GTEx/v8/Brain_Caudate_basal_ganglia:GTEx/v8/Brain_Hypothalamus:GTEx/v8/Breast_Mammary_Tissue:GTEx/v8/Esophagus_Mucosa:GTEx/v8/Esophagus_Muscularis:GTEx/v8/Heart_Atrial_Appendage:GTEx/v8/Lung:GTEx/v8/Muscle_Skele…	+	Yes	Fetal_Cortex:Liver:IMR90:Mesenchymal_Stem_Cell:Mesendoderm:Trophoblast-like_Cell:hESC	3.72302e-18	rs4776361;rs11632574;rs4776981;rs938875;rs4261477;rs8025526;rs11632574:rs4776981;rs4776361:rs4776981:rs8025526:rs4261477:rs938875;rs8025526:rs4261477;rs8025526:rs4776361:rs938875;rs11632574:rs938875	186
ENSG00000137764	MAP2K5	15	67835047	68099461	0.475918	NA	155	21.5	211	3.27170000000001e-310	0	eQTLcatalogue/Alasoo_2018_ge_macrophage_IFNg:eQTLcatalogue/Alasoo_2018_ge_macrophage_naive:eQTLcatalogue/BLUEPRINT_ge_monocyte:eQTLcatalogue/BLUEPRINT_ge_neutrophil:eQTLcatalogue/BLUEPRINT_ge_T-cell:eQTLcatalogue/BrainSeq_ge_brain:eQTLcatalogue/CEDAR_neutrophil_CD15:eQTLcatalogue/CEDAR_T-cell_CD4:eQTLcatalogue/CEDAR_T-cell_CD8:eQTLcatalogue/Fairfax_2012_B-cell_CD19:eQTLcatalogue/Fairfax_2014_IFN2…	+	Yes	Fetal_Cortex:Aorta:Left_Ventricle:Liver:Spleen:GM12878:IMR90:Mesenchymal_Stem_Cell:Mesendoderm:Neural_Progenitor_Cell:Trophoblast-like_Cell:hESC	3.72302e-18	rs4776981;rs4776361;rs11632574;rs938875;rs4261477;rs8025526;rs4776361:rs4776981:rs8025526:rs11632574:rs938875;rs11632574:rs938875;rs11632574:rs938875:rs4261477:rs4261477;rs8025526:rs938875;rs8025526:rs4776361	186
ENSG00000033800	PIAS1	15	68346517	68483096	0.997024	-0.402984	0	0	108	3.4351e-11	0	eQTLGen_cis_eQTLs:GTEx/v8/Adipose_Visceral_Omentum:GTEx/v8/Artery_Aorta:GTEx/v8/Muscle_Skeletal:GTEx/v8/Nerve_Tibial	+	Yes	GM12878:IMR90:Mesenchymal_Stem_Cell:Mesendoderm:hESC	3.72302e-18	rs4776361;rs4776981;rs8025526;rs938875;rs4261477;rs11632574;rs11632574:rs4776981:rs4776981;rs4776361:rs4261477;rs8025526:rs4261477:rs4776361:rs938875;rs11632574:rs938875;rs11632574:rs938875:rs8025526:rs938875	186
ENSG00000188779	SKOR1	15	68112042	68126899	NA	-0.128486	45	21.9	201	2.241e-32	0	eQTLcatalogue/BLUEPRINT_ge_monocyte:eQTLcatalogue/BLUEPRINT_ge_T-cell:eQTLcatalogue/TwinsUK_ge_fat:eQTLcatalogue/TwinsUK_ge_skin:eQTLcatalogue/van_de_Bunt_2015_ge_pancreatic_islet:PsychENCODE_eQTLs:eQTLGen_cis_eQTLs:BIOSQTL/BIOS_eQTL_geneLevel:GTEx/v8/Adipose_Subcutaneous:GTEx/v8/Adipose_Visceral_Omentum:GTEx/v8/Adrenal_Gland:GTEx/v8/Whole_Blood:GTEx/v8/Artery_Aorta:GTEx/v8/Artery_Coronary:GTEx/v…	+	Yes	Promoter_anchored_loops:Adult_Cortex:Fetal_Cortex:Aorta:Left_Ventricle:Liver:Pancreas:Spleen:GM12878:IMR90:Mesenchymal_Stem_Cell:Mesendoderm:Neural_Progenitor_Cell:Trophoblast-like_Cell:hESC	3.72302e-18	rs4261477;rs8025526;rs4776981;rs4776361;rs11632574;rs938875;rs4261477:rs4776981:rs11632574:rs938875;rs11632574:rs4776981;rs4776361:rs938875;rs11632574:rs938875:rs4776361:rs4261477;rs8025526:rs8025526	186
ENSG00000225940	AC022431.2	5	55807394	55902059	NA	NA	23	19.72	0	NA	NA	NA	NA	No	NA	4.64903e-18	rs16885714;rs11948950;rs9686661	77
ENSG00000248727	CTC-236F12.4	5	55753622	55777773	NA	NA	0	0	0	NA	NA	NA	NA	Yes	Left_Ventricle:Liver:IMR90:Mesenchymal_Stem_Cell:Mesendoderm:Trophoblast-like_Cell:hESC	4.64903e-18	rs9686661	77
ENSG00000134352	IL6ST	5	55230923	55290821	0.997843	-0.92204	0	0	0	NA	NA	NA	NA	Yes	IMR90	4.64903e-18	rs9686661	77
ENSG00000095015	MAP3K1	5	56111401	56191979	0.998072	-0.560268	0	0	0	NA	NA	NA	NA	Yes	Aorta:Left_Ventricle:IMR90:Mesenchymal_Stem_Cell:Mesendoderm:Neural_Progenitor_Cell:Trophoblast-like_Cell:hESC	4.64903e-18	rs9686661	77
ENSG00000155542	SETD9	5	56205087	56221359	0.000533498	0.0488662	0	0	0	NA	NA	NA	NA	Yes	IMR90:Mesenchymal_Stem_Cell	4.64903e-18	rs9686661	77
ENSG00000116985	BMP8B	1	40222854	40254533	0.77453	-0.688572	0	0	88	8.22708e-26	0	BIOSQTL/BIOS_eQTL_geneLevel:GTEx/v8/Thyroid	-	Yes	Adult_Cortex:GM12878:IMR90:Mesenchymal_Stem_Cell	5.72613e-18	rs2695319;rs11206430;rs4660208;rs4660808;rs4660208:rs11205802:rs11206430	7
ENSG00000146109	ABT1	6	26597180	26600278	0.0271056	0.104221	0	0	79	3.619e-14	0	eQTLGen_cis_eQTLs:GTEx/v8/Adipose_Subcutaneous:GTEx/v8/Brain_Hippocampus:GTEx/v8/Esophagus_Mucosa:GTEx/v8/Lung:GTEx/v8/Muscle_Skeletal:GTEx/v8/Skin_Not_Sun_Exposed_Suprapubic	+	Yes	Left_Ventricle:Liver:Spleen:GM12878:IMR90:Mesenchymal_Stem_Cell:Mesendoderm:Neural_Progenitor_Cell:Trophoblast-like_Cell:hESC	5.7329e-18	rs2066295;rs806794;rs2893843;rs6916289;rs707896;rs9379831;rs6916289:rs2893843:rs806794	88
ENSG00000124508	BTN2A2	6	26383324	26395102	0.000150288	1.01572	0	0	167	6.4567e-25	0	DICE/Monocyte_classical:eQTLGen_cis_eQTLs:BIOSQTL/BIOS_eQTL_geneLevel:GTEx/v8/Adipose_Subcutaneous:GTEx/v8/Adipose_Visceral_Omentum:GTEx/v8/Artery_Tibial:GTEx/v8/Colon_Sigmoid:GTEx/v8/Esophagus_Mucosa:GTEx/v8/Esophagus_Muscularis:GTEx/v8/Muscle_Skeletal:GTEx/v8/Cells_Cultured_fibroblasts:GTEx/v8/Skin_Not_Sun_Exposed_Suprapubic:GTEx/v8/Skin_Sun_Exposed_Lower_leg	+	Yes	GM12878:IMR90:Mesenchymal_Stem_Cell	5.7329e-18	rs4145878;rs6916289;rs707896;rs2066295;rs9379831;rs806794;rs2893843;rs1009181;rs806794:rs6916289:rs2893843	88
ENSG00000186470	BTN3A2	6	26365387	26378546	0.000124519	2.20791	0	0	176	6.5591e-165	0	eQTLcatalogue/Alasoo_2018_ge_macrophage_IFNg_Salmonella:eQTLcatalogue/Alasoo_2018_ge_macrophage_IFNg:eQTLcatalogue/Alasoo_2018_ge_macrophage_naive:eQTLcatalogue/Alasoo_2018_ge_macrophage_Salmonella:eQTLcatalogue/CEDAR_B-cell_CD19:eQTLcatalogue/CEDAR_monocyte_CD14:eQTLcatalogue/CEDAR_neutrophil_CD15:eQTLcatalogue/CEDAR_rectum:eQTLcatalogue/CEDAR_T-cell_CD4:eQTLcatalogue/CEDAR_T-cell_CD8:eQTLcatalo…	+	Yes	GM12878:IMR90:Mesenchymal_Stem_Cell	5.7329e-18	rs2893843;rs6916289;rs4145878;rs1009181;rs707896;rs2066295;rs9379831;rs806794;rs806794:rs6916289:rs2893843	88
ENSG00000187837	HIST1H1C	6	26055968	26056699	NA	0.137228	5	16.07	103	2.5821e-61	0	PsychENCODE_eQTLs:eQTLGen_cis_eQTLs:BIOSQTL/BIOS_eQTL_geneLevel:CMC_SVA_cis:CMC_NoSVA_cis:GTEx/v8/Brain_Cortex:GTEx/v8/Muscle_Skeletal	-	Yes	Left_Ventricle:Liver:Spleen:GM12878:IMR90:Mesenchymal_Stem_Cell:Mesendoderm:Neural_Progenitor_Cell:Trophoblast-like_Cell:hESC	5.7329e-18	rs707896;rs2066295;rs806794;rs4145878;rs6916289;rs2893843;rs1009181;rs9379831	88
ENSG00000158373	HIST1H2BD	6	26158349	26171577	0.000277979	-0.0152977	19	8.619	188	3.27170000000001e-310	0	eQTLcatalogue/CEDAR_B-cell_CD19:eQTLcatalogue/CEDAR_monocyte_CD14:eQTLcatalogue/CEDAR_neutrophil_CD15:eQTLcatalogue/CEDAR_platelet:eQTLcatalogue/CEDAR_T-cell_CD8:eQTLcatalogue/Fairfax_2014_IFN24:eQTLcatalogue/Fairfax_2014_LPS24:eQTLcatalogue/Fairfax_2014_LPS2:eQTLcatalogue/Fairfax_2014_naive:eQTLcatalogue/Lepik_2017_ge_blood:eQTLcatalogue/Naranbhai_2015_neutrophil_CD16:eQTLcatalogue/Nedelec_2016_…	+	Yes	Promoter_anchored_loops:Adult_Cortex:Fetal_Cortex:GM12878:IMR90:Neural_Progenitor_Cell	5.7329e-18	rs2066295;rs1009181;rs9379831;rs806794;rs4145878;rs6916289;rs2893843;rs707896;rs707896:rs806794:rs6916289:rs2893843	88
ENSG00000197846	HIST1H2BF	6	26199748	26200942	0.00030002	0.851063	9	21.1	155	4.1648e-167	0	eQTLGen_cis_eQTLs:BIOSQTL/BIOS_eQTL_geneLevel	+	Yes	Adult_Cortex:Fetal_Cortex:Left_Ventricle:Liver:GM12878:IMR90:Mesenchymal_Stem_Cell:Neural_Progenitor_Cell:Trophoblast-like_Cell:hESC	5.7329e-18	rs4145878;rs6916289;rs806794;rs707896;rs2066295;rs1009181;rs9379831;rs2893843;rs707896:rs2066295:rs6916289:rs806794:rs2893843:rs1009181:rs9379831	88
ENSG00000187990	HIST1H2BG	6	26216428	26216872	2.94452e-06	0.0253452	5	10.82	142	5.0953e-75	0	eQTLGen_cis_eQTLs:BIOSQTL/BIOS_eQTL_geneLevel:BRAINEAC/CRBL	-	Yes	Adult_Cortex:Fetal_Cortex:Left_Ventricle:Liver:GM12878:IMR90:Mesenchymal_Stem_Cell:Neural_Progenitor_Cell:Trophoblast-like_Cell:hESC	5.7329e-18	rs806794;rs4145878;rs2066295;rs1009181;rs9379831;rs6916289;rs2893843;rs707896;rs707896:rs2066295:rs6916289:rs2893843:rs806794:rs1009181:rs9379831	88
ENSG00000124635	HIST1H2BJ	6	27093676	27100541	0.478842	0.308582	0	0	47	1.7114e-13	0	eQTLGen_cis_eQTLs	-	Yes	Adult_Cortex:Fetal_Cortex:Aorta:Hippocampus:Left_Ventricle:Liver:Right_Ventricle:Spleen:GM12878:IMR90:Mesenchymal_Stem_Cell:Mesendoderm:Neural_Progenitor_Cell:Trophoblast-like_Cell:hESC	5.7329e-18	rs707896;rs2066295;rs1009181;rs9379831;rs806794;rs707896:rs2066295:rs806794:rs6916289:rs2893843:rs1009181:rs9379831	88
ENSG00000197903	HIST1H2BK	6	27106073	27114619	0.490754	-0.0430523	0	0	151	9.9725e-64	0	eQTLGen_cis_eQTLs:GTEx/v8/Artery_Tibial	-	Yes	Promoter_anchored_loops:Adult_Cortex:Fetal_Cortex:Aorta:Hippocampus:Left_Ventricle:Liver:Right_Ventricle:Spleen:GM12878:IMR90:Mesenchymal_Stem_Cell:Mesendoderm:Neural_Progenitor_Cell:Trophoblast-like_Cell:hESC	5.7329e-18	rs707896;rs2066295;rs1009181;rs9379831;rs806794;rs4145878;rs6916289;rs2893843;rs806794:rs6916289:rs2893843:rs707896:rs2066295:rs1009181:rs9379831	88
ENSG00000196532	HIST1H3C	6	26045639	26046097	0.215541	-0.193879	4	16.07	10	3.39589e-06	0.049	DICE/T_CD4_TH1_17	+	Yes	Promoter_anchored_loops:Left_Ventricle:Liver:Spleen:GM12878:IMR90:Mesenchymal_Stem_Cell:Mesendoderm:Neural_Progenitor_Cell:Trophoblast-like_Cell:hESC	5.7329e-18	rs707896;rs2066295	88
ENSG00000196966	HIST1H3E	6	26225383	26225844	0.000813429	-0.209795	3	3.863	122	4.2778e-31	0	PsychENCODE_eQTLs:eQTLGen_cis_eQTLs:BIOSQTL/BIOS_eQTL_geneLevel:BRAINEAC/HIPP:BRAINEAC/MEDU:BRAINEAC/PUTM:BRAINEAC/SNIG:BRAINEAC/TCTX:BRAINEAC/WHMT	-	Yes	Promoter_anchored_loops:Fetal_Cortex:Left_Ventricle:Liver:GM12878:IMR90:Mesenchymal_Stem_Cell:Neural_Progenitor_Cell:Trophoblast-like_Cell:hESC	5.7329e-18	rs806794;rs4145878;rs6916289;rs2893843;rs2066295;rs1009181;rs9379831;rs806794:rs6916289:rs707896:rs2066295:rs2893843:rs1009181:rs9379831	88
ENSG00000197061	HIST1H4C	6	26104104	26104518	8.85617e-05	0.852192	12	13.32	169	4.16519e-12	5.39101e-06	eQTLcatalogue/Fairfax_2014_IFN24:eQTLcatalogue/Fairfax_2014_LPS24:PsychENCODE_eQTLs:xQTLServer_eQTLs:CMC_SVA_cis	-	Yes	GM12878:IMR90:Neural_Progenitor_Cell	5.7329e-18	rs707896;rs2893843;rs806794;rs4145878;rs6916289;rs2066295;rs1009181;rs2066295:rs1009181:rs9379831:rs806794:rs6916289:rs2893843	88
ENSG00000198518	HIST1H4E	6	26204858	26206266	0.000642251	1.83578	11	21.1	155	2.0592e-79	0	eQTLGen_cis_eQTLs:BIOSQTL/BIOS_eQTL_geneLevel	+	Yes	Adult_Cortex:Fetal_Cortex:Left_Ventricle:Liver:GM12878:IMR90:Mesenchymal_Stem_Cell:Neural_Progenitor_Cell:Trophoblast-like_Cell:hESC	5.7329e-18	rs4145878;rs6916289;rs806794;rs707896;rs2066295;rs1009181;rs9379831;rs2893843;rs2066295:rs6916289:rs806794:rs2893843:rs1009181:rs9379831:rs707896	88
ENSG00000158406	HIST1H4H	6	26281283	26285762	0.00879033	1.05907	48	14.58	167	3.27170000000001e-310	0	eQTLcatalogue/BLUEPRINT_ge_neutrophil:eQTLcatalogue/BLUEPRINT_ge_T-cell:eQTLcatalogue/CEDAR_neutrophil_CD15:eQTLcatalogue/CEDAR_platelet:eQTLcatalogue/Lepik_2017_ge_blood:PsychENCODE_eQTLs:DICE/T_CD4_naive:eQTLGen_cis_eQTLs:BIOSQTL/BIOS_eQTL_geneLevel:CMC_SVA_cis:CMC_NoSVA_cis:GTEx/v8/Adipose_Subcutaneous:GTEx/v8/Whole_Blood:GTEx/v8/Artery_Tibial:GTEx/v8/Liver:GTEx/v8/Muscle_Skeletal:GTEx/v8/Skin…	+	Yes	Adult_Cortex:Fetal_Cortex:Aorta:Liver:Spleen:GM12878:IMR90:Mesenchymal_Stem_Cell:Neural_Progenitor_Cell:Trophoblast-like_Cell:hESC	5.7329e-18	rs6916289;rs2893843;rs4145878;rs2066295;rs9379831;rs806794;rs707896;rs1009181;rs806794:rs2893843:rs6916289:rs707896:rs2066295:rs1009181:rs9379831	88
ENSG00000182952	HMGN4	6	26538633	26546482	0.557082	-0.351003	0	0	110	1.0838e-27	0	eQTLGen_cis_eQTLs:BIOSQTL/BIOS_eQTL_geneLevel:GTEx/v8/Whole_Blood:GTEx/v8/Muscle_Skeletal:GTEx/v8/Pancreas	+	Yes	Aorta:Hippocampus:Left_Ventricle:Liver:Spleen:GM12878:IMR90:Mesenchymal_Stem_Cell:Mesendoderm:Neural_Progenitor_Cell:Trophoblast-like_Cell:hESC	5.7329e-18	rs707896;rs2066295;rs1009181;rs9379831;rs4145878;rs6916289;rs2893843;rs6916289:rs2893843:rs806794:rs2066295:rs1009181:rs9379831	88
ENSG00000124564	SLC17A3	6	25833294	25882514	9.88206e-14	-0.246503	0	0	136	3.638e-25	0	DICE/T_CD4_TH17:eQTLGen_cis_eQTLs:BIOSQTL/BIOS_eQTL_geneLevel:GTEx/v8/Testis	-	No	NA	5.7329e-18	rs1009181;rs707896;rs2066295;rs9379831;rs806794;rs4145878;rs6916289;rs2893843	88
ENSG00000112343	TRIM38	6	25963030	25987384	4.7513e-06	-0.220583	0	0	154	1.4882e-46	0	eQTLcatalogue/GENCORD_ge_fibroblast:eQTLGen_cis_eQTLs:BIOSQTL/BIOS_eQTL_geneLevel:GTEx/v8/Adipose_Subcutaneous:GTEx/v8/Adrenal_Gland:GTEx/v8/Whole_Blood:GTEx/v8/Colon_Transverse:GTEx/v8/Esophagus_Gastroesophageal_Junction:GTEx/v8/Esophagus_Mucosa:GTEx/v8/Esophagus_Muscularis:GTEx/v8/Heart_Atrial_Appendage:GTEx/v8/Muscle_Skeletal:GTEx/v8/Nerve_Tibial:GTEx/v8/Pancreas:GTEx/v8/Minor_Salivary_Gland:G…	+	No	NA	5.7329e-18	rs707896;rs2066295;rs1009181;rs9379831;rs806794;rs4145878;rs6916289;rs2893843	88
ENSG00000179564	LSMEM2	3	50316458	50325545	2.89144e-05	-0.548022	1	1.434	21	4.35483e-05	0.00239992	BIOSQTL/BIOS_eQTL_geneLevel:GTEx/v8/Muscle_Skeletal	-	No	NA	7.68565e-18	rs12631248;rs2014830;rs7648987;rs2526754	54
ENSG00000137259	HIST1H2AB	6	26033320	26033796	0.00531944	0.228135	1	1.758	16	NA	0.009	CMC_SVA_cis:CMC_NoSVA_cis	-	Yes	Adult_Cortex:Fetal_Cortex:Dorsolateral_Prefrontal_Cortex:Left_Ventricle:Liver:GM12878:IMR90:Mesenchymal_Stem_Cell:Trophoblast-like_Cell:hESC	8.27458e-18	rs707896;rs2066295;rs1009181;rs806794;rs4145878;rs6916289;rs2066295:rs806794:rs6916289:rs707896:rs1009181:rs9379831:rs2893843	88
ENSG00000068001	HYAL2	3	50355221	50360337	0.0206315	-1.37438	0	0	0	NA	NA	NA	NA	Yes	Promoter_anchored_loops:Adult_Cortex:Fetal_Cortex:IMR90:Mesendoderm:hESC	8.39429e-18	rs7648987:rs4768:rs12631248:rs2526754:rs11712056:rs2526754;rs11712056:rs2188151:rs11720264	54
ENSG00000114383	TUSC2	3	50357458	50365682	0.703033	-0.593776	0	0	0	NA	NA	NA	NA	Yes	Adult_Cortex:Fetal_Cortex:IMR90:Mesendoderm:hESC	8.39429e-18	rs7648987:rs4768:rs12631248:rs2526754:rs2526754;rs11712056:rs2188151:rs11712056:rs11720264	54
ENSG00000169018	FEM1B	15	68570141	68588203	0.540949	-0.524764	0	0	8	6.87615e-05	0.0108223	GTEx/v8/Colon_Transverse	-	Yes	Fetal_Cortex:Left_Ventricle:GM12878:IMR90:Mesenchymal_Stem_Cell:Mesendoderm	8.57297e-18	rs11632574;rs938875;rs11632574:rs4776981:rs4776981;rs4776361:rs938875;rs4261477;rs11632574:rs938875;rs11632574:rs938875:rs4261477:rs4776361:rs4261477;rs8025526:rs8025526	186
ENSG00000267985	AC005488.1	7	72459478	72464996	NA	NA	0	0	78	5.9347e-18	0	eQTLGen_cis_eQTLs	+	No	NA	9.16922e-18	rs11981190;rs13244268;rs7811265;rs13230514	109;110
ENSG00000009954	BAZ1B	7	72854728	72936608	1	-1.10698	36	8.812	24	9.3874e-08	1.08361e-07	eQTLGen_cis_eQTLs:GTEx/v8/Thyroid	-	Yes	Promoter_anchored_loops:Adult_Cortex:Fetal_Cortex:GM12878:IMR90:Mesenchymal_Stem_Cell:Mesendoderm:Trophoblast-like_Cell:hESC	9.16922e-18	rs13244268;rs7811265;rs7811265:rs13244268	110
ENSG00000106635	BCL7B	7	72950686	72972332	0.706637	-0.386261	14	14.54	143	9.0772e-27	0	eQTLcatalogue/BLUEPRINT_ge_T-cell:eQTLcatalogue/Kasela_2017_T-cell_CD4:eQTLcatalogue/Kasela_2017_T-cell_CD8:eQTLcatalogue/Quach_2016_ge_monocyte_IAV:eQTLcatalogue/Quach_2016_ge_monocyte_LPS:eQTLcatalogue/Quach_2016_ge_monocyte_Pam3CSK4:eQTLGen_cis_eQTLs:BIOSQTL/BIOS_eQTL_geneLevel:GTEx/v8/Adipose_Subcutaneous:GTEx/v8/Whole_Blood:GTEx/v8/Artery_Aorta:GTEx/v8/Artery_Tibial:GTEx/v8/Brain_Caudate_bas…	-	Yes	Promoter_anchored_loops:Adult_Cortex:Fetal_Cortex	9.16922e-18	rs7811265;rs13244268;rs13230514;rs7811265:rs13244268	110
ENSG00000009950	MLXIPL	7	73007524	73038873	0.676823	0.477224	69	19.09	127	5.2881e-56	2.92924e-48	eQTLcatalogue/TwinsUK_ge_fat:eQTLcatalogue/TwinsUK_ge_skin:CMC_SVA_cis:GTEx/v8/Adipose_Subcutaneous:GTEx/v8/Adipose_Visceral_Omentum:GTEx/v8/Breast_Mammary_Tissue:GTEx/v8/Colon_Sigmoid:GTEx/v8/Colon_Transverse:GTEx/v8/Esophagus_Gastroesophageal_Junction:GTEx/v8/Esophagus_Mucosa:GTEx/v8/Esophagus_Muscularis:GTEx/v8/Heart_Atrial_Appendage:GTEx/v8/Heart_Left_Ventricle:GTEx/v8/Lung:GTEx/v8/Ovary:GTEx…	-	Yes	Promoter_anchored_loops:Adult_Cortex	9.16922e-18	rs7811265;rs13244268;rs13230514;rs7811265:rs13244268	110
ENSG00000196313	POM121	7	72349936	72421979	NA	-1.37062	0	0	80	1.37629e-08	1.50688e-66	eQTLGen_cis_eQTLs:GTEx/v8/Adipose_Subcutaneous:GTEx/v8/Whole_Blood:GTEx/v8/Artery_Aorta:GTEx/v8/Artery_Tibial:GTEx/v8/Brain_Cerebellar_Hemisphere:GTEx/v8/Brain_Cerebellum:GTEx/v8/Brain_Frontal_Cortex_BA9:GTEx/v8/Colon_Transverse:GTEx/v8/Esophagus_Gastroesophageal_Junction:GTEx/v8/Esophagus_Mucosa:GTEx/v8/Esophagus_Muscularis:GTEx/v8/Heart_Atrial_Appendage:GTEx/v8/Lung:GTEx/v8/Muscle_Skeletal:GTEx…	-	Yes	Promoter_anchored_loops	9.16922e-18	rs7811265;rs13244268;rs13230514;rs13244268:rs7811265	110
ENSG00000106638	TBL2	7	72983262	72993121	0.00437651	8.9213	29	10.3	84	3.55546e-08	4.93874e-46	eQTLcatalogue/TwinsUK_ge_skin:eQTLGen_cis_eQTLs:BIOSQTL/BIOS_eQTL_geneLevel:GTEx/v8/Artery_Tibial:GTEx/v8/Heart_Atrial_Appendage:GTEx/v8/Cells_Cultured_fibroblasts:GTEx/v8/Skin_Not_Sun_Exposed_Suprapubic:GTEx/v8/Testis	-	No	NA	9.16922e-18	rs7811265;rs13244268;rs13230514	110
ENSG00000146755	TRIM50	7	72726535	72742085	2.72562e-06	-0.790239	0	0	76	2.1759e-08	3.4648e-05	BIOSQTL/BIOS_eQTL_geneLevel:GTEx/v8/Thyroid	-	No	NA	9.16922e-18	rs7811265;rs13244268	110
ENSG00000173334	TRIB1	8	126442563	126450647	0.606588	-0.456914	0	0	10	5.7895e-06	0.0289475	eQTLcatalogue/Alasoo_2018_ge_macrophage_Salmonella	+	No	NA	9.32259e-18	rs10808546	129
ENSG00000076043	REXO2	11	114310108	114321001	0.888429	-0.470637	0	0	0	NA	NA	NA	NA	Yes	IMR90:Mesenchymal_Stem_Cell	1.0076e-17	rs480823:rs664059:rs2000571:rs180360;rs619054;rs10892019:rs10488698:rs180326:rs1263056:rs10488698;rs7117145:rs11601584:rs10892019;rs2846012:rs2000571;rs11601584:rs10892019:rs17119878:rs11826999;rs2000571:rs180360:rs619054	155
ENSG00000138031	ADCY3	2	25042038	25142708	0.0013793	-0.638879	201	13.63	369	1.78951e-108	0	eQTLcatalogue/Alasoo_2018_ge_macrophage_naive:eQTLcatalogue/Alasoo_2018_ge_macrophage_Salmonella:eQTLcatalogue/BLUEPRINT_ge_monocyte:eQTLcatalogue/BLUEPRINT_ge_T-cell:eQTLcatalogue/BrainSeq_ge_brain:eQTLcatalogue/CEDAR_ileum:eQTLcatalogue/CEDAR_monocyte_CD14:eQTLcatalogue/CEDAR_neutrophil_CD15:eQTLcatalogue/CEDAR_platelet:eQTLcatalogue/CEDAR_rectum:eQTLcatalogue/CEDAR_T-cell_CD4:eQTLcatalogue/CED…	-	Yes	Promoter_anchored_loops:Adult_Cortex:Fetal_Cortex:GM12878:IMR90:Mesenchymal_Stem_Cell:Mesendoderm:hESC	1.04755e-17	rs13390269;rs1550116;rs11676272;rs6545812;rs7576788;rs6726261;rs493090;rs6749646;rs934778;rs6545975;rs1550116:rs13390269:rs11676272;rs7576788:rs11676272;rs493090:rs6545812;rs13390269:rs7576788:rs6545812:rs934778	28
ENSG00000138092	CENPO	2	25016005	25045245	6.62948e-06	0.226383	36	11.13	349	4.92438e-63	0	eQTLcatalogue/BrainSeq_ge_brain:PsychENCODE_eQTLs:eQTLGen_cis_eQTLs:BIOSQTL/BIOS_eQTL_geneLevel:CMC_SVA_cis:CMC_NoSVA_cis:GTEx/v8/Adipose_Subcutaneous:GTEx/v8/Adipose_Visceral_Omentum:GTEx/v8/Whole_Blood:GTEx/v8/Artery_Tibial:GTEx/v8/Lung:GTEx/v8/Nerve_Tibial:GTEx/v8/Testis	+	Yes	Promoter_anchored_loops:Fetal_Cortex:Aorta:Hippocampus:Left_Ventricle:Liver:GM12878:IMR90:Mesenchymal_Stem_Cell:Mesendoderm:Trophoblast-like_Cell:hESC	1.04755e-17	rs13390269;rs1550116;rs11676272;rs7576788;rs6726261;rs6545812;rs12991495;rs493090;rs6749646;rs934778;rs6545975;rs13390269:rs11676272;rs7576788:rs11676272;rs493090:rs6749646	28
ENSG00000115137	DNAJC27	2	25166505	25194963	0.0482582	-1.29261	30	9.092	346	2.9507e-68	0	eQTLcatalogue/HipSci_ge_iPSC:eQTLcatalogue/Quach_2016_ge_monocyte_IAV:eQTLcatalogue/Quach_2016_ge_monocyte_R848:PsychENCODE_eQTLs:eQTLGen_cis_eQTLs:BIOSQTL/BIOS_eQTL_geneLevel:CMC_SVA_cis:CMC_NoSVA_cis:GTEx/v8/Adipose_Subcutaneous:GTEx/v8/Adipose_Visceral_Omentum:GTEx/v8/Whole_Blood:GTEx/v8/Cells_Cultured_fibroblasts	+	Yes	Promoter_anchored_loops:Hippocampus:Left_Ventricle:Liver:GM12878:IMR90:Mesenchymal_Stem_Cell:Mesendoderm:Neural_Progenitor_Cell:Trophoblast-like_Cell:hESC	1.04755e-17	rs11676272;rs6726261;rs493090;rs6749646;rs6545812;rs12991495;rs7576788;rs1550116;rs13390269;rs934778;rs6749646:rs13390269:rs934778:rs11676272:rs11676272;rs7576788:rs6545812:rs11676272;rs493090:rs12991495:rs6545812;rs13390269:rs7576788:rs493090	28
ENSG00000084710	EFR3B	2	25264999	25378243	NA	-0.492151	68	16.38	203	1.32174e-13	3.91163e-09	eQTLcatalogue/CEDAR_transverse_colon:PsychENCODE_eQTLs:BIOSQTL/BIOS_eQTL_geneLevel:CMC_SVA_cis:GTEx/v8/Adipose_Visceral_Omentum:GTEx/v8/Adrenal_Gland:GTEx/v8/Brain_Putamen_basal_ganglia:GTEx/v8/Colon_Transverse:GTEx/v8/Esophagus_Muscularis:GTEx/v8/Heart_Atrial_Appendage:GTEx/v8/Nerve_Tibial:GTEx/v8/Skin_Not_Sun_Exposed_Suprapubic:GTEx/v8/Skin_Sun_Exposed_Lower_leg:GTEx/v8/Spleen:GTEx/v8/Stomach	+	Yes	Promoter_anchored_loops:EP_correlation_cell_type_oneway:Adult_Cortex:Fetal_Cortex:Hippocampus:Left_Ventricle:Liver:GM12878:IMR90:Mesenchymal_Stem_Cell:Mesendoderm:Trophoblast-like_Cell:hESC	1.04755e-17	rs11676272;rs493090;rs6749646;rs934778;rs6545812;rs12991495;rs6545975;rs13390269;rs6726261;rs7576788;rs493090:rs6545812:rs11676272;rs7576788:rs11676272:rs934778:rs13390269:rs493090:rs12991495	28
ENSG00000219626	FAM228B	2	24299396	24392509	NA	NA	0	0	0	NA	NA	NA	NA	Yes	Adult_Cortex:Fetal_Cortex:Left_Ventricle:Mesenchymal_Stem_Cell	1.04755e-17	rs13390269:rs11676272;rs7576788:rs11676272:rs6545812:rs934778:rs11676272;rs493090:rs6749646	28
ENSG00000198399	ITSN2	2	24425733	24583583	0.0244337	0.348013	0	0	14	2.09666e-05	0.00330583	GTEx/v8/Testis	-	Yes	Fetal_Cortex:Left_Ventricle:GM12878:IMR90:Mesenchymal_Stem_Cell:Mesendoderm:Trophoblast-like_Cell:hESC	1.04755e-17	rs12991495;rs13390269:rs11676272:rs11676272;rs7576788:rs6545812:rs6749646:rs6545812;rs13390269:rs7576788:rs11676272;rs493090:rs934778	28
ENSG00000084676	NCOA1	2	24714783	24993571	0.999077	-1.43882	32	16.62	255	5.4612e-22	0	eQTLcatalogue/TwinsUK_ge_fat:eQTLGen_cis_eQTLs:BIOSQTL/BIOS_eQTL_geneLevel:CMC_SVA_cis:GTEx/v8/Whole_Blood:GTEx/v8/Brain_Putamen_basal_ganglia:GTEx/v8/Breast_Mammary_Tissue:GTEx/v8/Esophagus_Muscularis:GTEx/v8/Heart_Atrial_Appendage:GTEx/v8/Lung:GTEx/v8/Nerve_Tibial:GTEx/v8/Pancreas:GTEx/v8/Skin_Not_Sun_Exposed_Suprapubic:GTEx/v8/Thyroid	+	Yes	Left_Ventricle:GM12878:IMR90:Mesenchymal_Stem_Cell:Mesendoderm:Trophoblast-like_Cell:hESC	1.04755e-17	rs13390269;rs1550116;rs11676272;rs6545812;rs7576788;rs6726261;rs493090;rs13390269:rs6545812;rs13390269:rs11676272;rs7576788:rs7576788:rs6545812:rs11676272;rs493090:rs934778:rs1550116:rs11676272:rs6749646:rs493090	28
ENSG00000115138	POMC	2	25383722	25391772	0.000689013	-0.589633	10	8.842	322	1.2293e-98	0	eQTLcatalogue/BrainSeq_ge_brain:eQTLcatalogue/Fairfax_2014_IFN24:eQTLcatalogue/Fairfax_2014_LPS2:eQTLcatalogue/Lepik_2017_ge_blood:eQTLcatalogue/Nedelec_2016_ge_macrophage_Listeria:eQTLcatalogue/Nedelec_2016_ge_macrophage_naive:eQTLcatalogue/Nedelec_2016_ge_macrophage_Salmonella:eQTLcatalogue/Quach_2016_ge_monocyte_naive:eQTLcatalogue/TwinsUK_ge_LCL:PsychENCODE_eQTLs:eQTLGen_cis_eQTLs:BIOSQTL/BIO…	-	Yes	Left_Ventricle:Liver:Spleen:GM12878:IMR90:Mesenchymal_Stem_Cell:Mesendoderm:Neural_Progenitor_Cell:Trophoblast-like_Cell:hESC	1.04755e-17	rs934778;rs12991495;rs6545975;rs6545812;rs493090;rs6749646;rs11676272;rs7576788;rs13390269;rs1550116;rs6726261;rs7581217;rs493090:rs493090:rs13390269:rs11676272:rs11676272;rs7576788:rs6545812:rs6749646	28
ENSG00000184924	PTRHD1	2	25012603	25016251	9.18017e-06	-0.352191	13	8.454	142	1.16384e-06	0.00144399	eQTLGen_cis_eQTLs:GTEx/v8/Whole_Blood	+	Yes	Promoter_anchored_loops:Fetal_Cortex:Aorta:Hippocampus:Left_Ventricle:Liver:GM12878:IMR90:Mesenchymal_Stem_Cell:Mesendoderm:Trophoblast-like_Cell:hESC	1.04755e-17	rs13390269;rs1550116;rs11676272;rs7576788;rs6726261;rs493090;rs13390269:rs11676272;rs7576788:rs11676272;rs493090:rs6749646	28
ENSG00000115128	SF3B14	2	24290454	24299313	0.881404	NA	0	0	0	NA	NA	NA	NA	Yes	Adult_Cortex:Fetal_Cortex:Left_Ventricle:Mesenchymal_Stem_Cell	1.04755e-17	rs13390269:rs11676272;rs7576788:rs11676272:rs6545812:rs934778:rs11676272;rs493090:rs6749646	28
ENSG00000115129	TP53I3	2	24300303	24308731	3.75804e-07	0.785513	0	0	139	7.2866e-14	0	eQTLcatalogue/Nedelec_2016_ge_macrophage_Listeria:eQTLcatalogue/Nedelec_2016_ge_macrophage_naive:eQTLcatalogue/Nedelec_2016_ge_macrophage_Salmonella:eQTLGen_cis_eQTLs:eQTLGen_trans_eQTLs:CMC_SVA_cis:GTEx/v8/Adipose_Subcutaneous	-	Yes	Left_Ventricle:Mesenchymal_Stem_Cell	1.04755e-17	rs6545812;rs13390269;rs1550116;rs11676272;rs7576788;rs6726261;rs493090;rs7198357;rs7201742;rs13390269:rs11676272	28;201
ENSG00000173960	UBXN2A	2	24150155	24227779	0.000588703	1.80835	0	0	137	1.8416e-10	0	eQTLGen_cis_eQTLs	+	Yes	Fetal_Cortex:Left_Ventricle	1.04755e-17	rs13390269;rs1550116;rs11676272;rs7576788;rs6726261;rs493090;rs13390269:rs11676272	28
ENSG00000155897	ADCY8	8	131792547	132054672	0.00298566	-1.07659	0	0	133	6.87196e-28	4.15455e-20	xQTLServer_eQTLs	NA	No	NA	1.04755e-17	rs11676272;rs7576788;rs6726261;rs493090	28
ENSG00000168298	HIST1H1E	6	26156559	26157343	NA	-0.396522	9	7.945	0	NA	NA	NA	NA	Yes	Promoter_anchored_loops:Adult_Cortex:Fetal_Cortex:GM12878:IMR90:Neural_Progenitor_Cell	1.13227e-17	rs1009181;rs2066295;rs707896:rs806794:rs6916289:rs2893843	88
ENSG00000166949	SMAD3	15	67356101	67487533	0.868268	-0.0916101	0	0	64	3.1654e-19	0	eQTLGen_cis_eQTLs:GTEx/v8/Adipose_Subcutaneous	-	Yes	Fetal_Cortex:Aorta:Left_Ventricle:Liver:GM12878:IMR90:Mesenchymal_Stem_Cell:Mesendoderm:Neural_Progenitor_Cell:Trophoblast-like_Cell:hESC	1.15763e-17	rs4776361;rs4776981;rs11632574;rs4776361:rs4776981:rs8025526:rs938875;rs4261477;rs11632574:rs938875;rs11632574:rs938875:rs4261477:rs4261477;rs8025526:rs11632574:rs938875;rs8025526:rs4776361	186
ENSG00000119772	DNMT3A	2	25455845	25565459	7.72788e-45	-0.66862	14	8.919	53	2.89914e-13	0	eQTLGen_cis_eQTLs:BIOSQTL/BIOS_eQTL_geneLevel:GTEx/v8/Esophagus_Mucosa	-	Yes	Promoter_anchored_loops	1.26891e-17	rs12991495;rs934778;rs7581217;rs6749646;rs6545975;rs934778:rs12991495:rs7581217	28
ENSG00000140350	ANP32A	15	69070874	69113236	0.97387	-0.320247	0	0	0	NA	NA	NA	NA	Yes	Mesenchymal_Stem_Cell	1.27569e-17	rs4776361:rs11632574:rs938875;rs4261477;rs11632574:rs4776981;rs4776361:rs938875;rs11632574:rs938875:rs4261477	186
ENSG00000166938	DIS3L	15	66585555	66626236	1.29328e-10	0.173205	0	0	0	NA	NA	NA	NA	Yes	Left_Ventricle:Mesenchymal_Stem_Cell:Mesendoderm:Trophoblast-like_Cell	1.27569e-17	rs11632574:rs4261477:rs938875;rs4261477;rs8025526:rs4776981:rs4776981;rs4776361:rs4261477;rs8025526:rs8025526:rs938875;rs11632574:rs938875	186
ENSG00000137809	ITGA11	15	68594050	68724501	0.000116169	0.0215282	0	0	0	NA	NA	NA	NA	Yes	Fetal_Cortex:Mesendoderm:Trophoblast-like_Cell	1.27569e-17	rs11632574:rs4776981;rs4776361:rs4776981:rs8025526:rs938875;rs4261477;rs11632574:rs938875;rs11632574:rs938875:rs4261477	186
ENSG00000169032	MAP2K1	15	66679155	66784650	0.994501	0.482243	0	0	0	NA	NA	NA	NA	Yes	IMR90:Mesenchymal_Stem_Cell	1.27569e-17	rs938875;rs4261477;rs11632574:rs4776981;rs4776361:rs938875;rs11632574:rs938875:rs4261477:rs11632574:rs4776981:rs4261477;rs8025526:rs8025526:rs938875;rs8025526	186
ENSG00000157890	MEGF11	15	66187417	66546085	2.51822e-24	-0.851967	0	0	0	NA	NA	NA	NA	Yes	Mesenchymal_Stem_Cell	1.27569e-17	rs938875;rs4261477;rs11632574:rs4776981;rs4776361:rs938875;rs11632574:rs938875:rs4261477	186
ENSG00000137819	PAQR5	15	69591286	69700119	0.153783	-0.800097	0	0	0	NA	NA	NA	NA	Yes	IMR90	1.27569e-17	rs938875;rs4261477;rs11632574:rs4776981;rs4776361:rs938875;rs11632574:rs938875:rs4261477	186
ENSG00000090470	PDCD7	15	65409717	65426174	0.0453748	-1.23262	0	0	0	NA	NA	NA	NA	Yes	Adult_Cortex:Left_Ventricle	1.27569e-17	rs4074448:rs938875;rs4261477;rs11632574:rs4776981;rs4776361:rs938875;rs11632574:rs938875:rs4261477	185;186
ENSG00000259471	RP11-321F6.1	15	66874528	66978132	NA	NA	0	0	0	NA	NA	NA	NA	Yes	Mesenchymal_Stem_Cell	1.27569e-17	rs4776361:rs11632574:rs938875;rs4261477;rs11632574:rs4776981;rs4776361:rs938875;rs11632574:rs938875:rs4261477	186
ENSG00000074621	SLC24A1	15	65903704	65953333	0.000127201	-0.294311	0	0	0	NA	NA	NA	NA	Yes	Trophoblast-like_Cell	1.27569e-17	rs938875;rs4261477;rs11632574:rs4776981;rs4776361:rs938875;rs11632574:rs938875:rs4261477	186
ENSG00000137834	SMAD6	15	66994566	67074338	6.96558e-06	NA	0	0	0	NA	NA	NA	NA	Yes	IMR90:Mesenchymal_Stem_Cell:Trophoblast-like_Cell	1.27569e-17	rs4776361:rs11632574:rs4776981;rs4776361:rs938875;rs4261477;rs11632574:rs938875;rs11632574:rs938875:rs4261477:rs4776981:rs4261477;rs8025526:rs8025526	186
ENSG00000174446	SNAPC5	15	66782473	66790151	1.40204e-05	-0.559813	0	0	0	NA	NA	NA	NA	Yes	Mesenchymal_Stem_Cell	1.27569e-17	rs938875;rs4261477;rs11632574:rs4776981;rs4776361:rs938875;rs11632574:rs938875:rs4261477	186
ENSG00000258484	SPESP1	15	69110560	69239150	1.97659e-05	-0.698005	0	0	0	NA	NA	NA	NA	Yes	Mesenchymal_Stem_Cell	1.27569e-17	rs4776361:rs11632574:rs938875;rs4261477;rs11632574:rs4776981;rs4776361:rs938875;rs11632574:rs938875:rs4261477	186
ENSG00000075131	TIPIN	15	66628544	66679084	0.00983208	0.173277	0	0	0	NA	NA	NA	NA	Yes	IMR90:Mesenchymal_Stem_Cell	1.27569e-17	rs938875;rs4261477;rs11632574:rs4776981;rs4776361:rs938875;rs11632574:rs938875:rs4261477:rs11632574:rs4776981:rs4261477;rs8025526:rs8025526:rs938875;rs8025526	186
ENSG00000138614	VWA9	15	65871091	65903627	0.00309381	0.512411	0	0	0	NA	NA	NA	NA	Yes	Trophoblast-like_Cell	1.27569e-17	rs938875;rs4261477;rs11632574:rs4776981;rs4776361:rs938875;rs11632574:rs938875:rs4261477	186
ENSG00000174442	ZWILCH	15	66797297	66842115	8.31164e-06	-0.145835	0	0	0	NA	NA	NA	NA	Yes	Mesenchymal_Stem_Cell	1.27569e-17	rs938875;rs4261477;rs11632574:rs4776981;rs4776361:rs938875;rs11632574:rs938875:rs4261477	186
ENSG00000188763	FZD9	7	72848109	72850450	NA	NA	5	3.057	20	0.000233767	1.64815e-07	PsychENCODE_eQTLs:CMC_SVA_cis:GTEx/v8/Nerve_Tibial	-	Yes	Promoter_anchored_loops:GM12878:IMR90:Mesenchymal_Stem_Cell:Mesendoderm:Trophoblast-like_Cell:hESC	1.37355e-17	rs13244268;rs7811265;rs13244268:rs7811265	110
ENSG00000130305	NSUN5	7	72716514	72722864	1.45415e-06	-0.276519	0	0	16	8.67626e-06	0.0433813	eQTLcatalogue/TwinsUK_ge_fat	+	Yes	Promoter_anchored_loops:Spleen:IMR90:Mesenchymal_Stem_Cell:Mesendoderm	1.37355e-17	rs7811265;rs13244268:rs7811265	110
ENSG00000163751	CPA3	3	148583043	148614983	1.28343e-12	0.0249414	0	0	10	7.2837e-10	2.03417e-05	eQTLGen_trans_eQTLs	-	No	NA	1.48274e-17	rs442177;rs13244268;rs7811265;rs10808546	71;110;129
ENSG00000176428	VPS37D	7	73082155	73086442	0.656347	NA	0	0	50	2.29153e-10	1.34286e-08	eQTLcatalogue/TwinsUK_ge_fat:GTEx/v8/Adipose_Subcutaneous:GTEx/v8/Adipose_Visceral_Omentum:GTEx/v8/Artery_Aorta	-	Yes	Promoter_anchored_loops:Adult_Cortex:Fetal_Cortex	1.48274e-17	rs7811265;rs13244268;rs13230514;rs7811265:rs13244268	110
ENSG00000071462	WBSCR22	7	73097355	73119491	0.521152	NA	0	0	80	4.7685e-57	0	eQTLcatalogue/CEDAR_neutrophil_CD15:eQTLcatalogue/Fairfax_2014_naive:eQTLGen_cis_eQTLs:BIOSQTL/BIOS_eQTL_geneLevel:GTEx/v8/Testis	-	No	NA	1.48274e-17	rs13244268;rs7811265;rs13230514	110
ENSG00000099331	MYO9B	19	17186591	17325346	0.999999	NA	0	0	3	1.5851e-06	0.012369	eQTLGen_trans_eQTLs	+	No	NA	1.48274e-17	rs7811265;rs13244268	110
ENSG00000124529	HIST1H4B	6	26027124	26027480	0.00854183	0.166119	0	0	63	2.23137e-05	0.00224233	PsychENCODE_eQTLs:CMC_SVA_cis	-	Yes	Fetal_Cortex:Dorsolateral_Prefrontal_Cortex:Left_Ventricle:Liver:GM12878:IMR90:Mesenchymal_Stem_Cell:Trophoblast-like_Cell:hESC	1.50354e-17	rs4145878;rs6916289;rs2893843;rs2066295;rs1009181;rs806794;rs707896:rs2066295:rs806794:rs6916289:rs1009181:rs9379831:rs2893843	88
ENSG00000100629	CEP128	14	80943330	81425861	4.0919e-18	0.575777	0	0	0	NA	NA	NA	NA	Yes	Left_Ventricle:IMR90:Mesenchymal_Stem_Cell:Mesendoderm:Trophoblast-like_Cell:hESC	1.71228e-17	rs7144011:rs8021408:rs2197990:rs17836226	176
ENSG00000021645	NRXN3	14	78708734	80330762	0.999856	-0.649548	152	18.29	0	NA	NA	NA	NA	No	NA	1.71228e-17	rs7144011;rs2197990;rs7141420;rs8021408;rs17836226	176
ENSG00000140022	STON2	14	81727000	81902809	0.568326	0.348034	0	0	0	NA	NA	NA	NA	Yes	IMR90:Mesenchymal_Stem_Cell:Mesendoderm:hESC	1.71228e-17	rs2197990:rs7144011:rs8021408:rs17836226	176
ENSG00000165409	TSHR	14	81421333	81612646	5.80342e-06	0.79987	0	0	0	NA	NA	NA	NA	Yes	Left_Ventricle:IMR90:Mesenchymal_Stem_Cell:Mesendoderm:Trophoblast-like_Cell:hESC	1.71228e-17	rs7144011:rs8021408:rs2197990:rs17836226	176
ENSG00000163879	DNALI1	1	38022520	38032458	6.82032e-08	1.00569	0	0	0	NA	NA	NA	NA	Yes	Adult_Cortex:Fetal_Cortex:Mesendoderm:hESC	1.73711e-17	rs4660208:rs11205802	7
ENSG00000163877	SNIP1	1	38000050	38019903	0.905058	-1.79424	0	0	0	NA	NA	NA	NA	Yes	Adult_Cortex:Fetal_Cortex:Mesendoderm:hESC	1.73711e-17	rs4660208:rs11205802	7
ENSG00000204084	INPP5B	1	38326369	38412729	7.4329e-09	0.0191111	0	0	0	NA	NA	NA	NA	Yes	Fetal_Cortex:hESC	1.90169e-17	rs4660208:rs11205802:rs2695319:rs4660808	7
ENSG00000178149	DALRD3	3	49052921	49059726	1.84814e-05	0.0723068	0	0	233	2.08678e-102	0	eQTLcatalogue/TwinsUK_ge_fat:PsychENCODE_eQTLs:DICE/Monocyte_non_classical:eQTLGen_cis_eQTLs:BIOSQTL/BIOS_eQTL_geneLevel:CMC_SVA_cis:GTEx/v8/Adipose_Subcutaneous:GTEx/v8/Adipose_Visceral_Omentum:GTEx/v8/Brain_Anterior_cingulate_cortex_BA24:GTEx/v8/Brain_Cerebellum:GTEx/v8/Brain_Cortex:GTEx/v8/Esophagus_Mucosa:GTEx/v8/Esophagus_Muscularis:GTEx/v8/Heart_Atrial_Appendage:GTEx/v8/Lung:GTEx/v8/Muscle_…	+	Yes	Promoter_anchored_loops:Adult_Cortex:Fetal_Cortex	1.95416e-17	rs11720264;rs12631248;rs4768;rs2280405;rs13100903;rs11720264:rs7648987:rs2526754;rs11712056:rs2526754:rs12631248:rs4768	54
ENSG00000178035	IMPDH2	3	49061758	49066841	0.00135317	-0.509343	0	0	0	NA	NA	NA	NA	Yes	Promoter_anchored_loops	1.95416e-17	rs7648987:rs12631248:rs4768	54
ENSG00000178057	NDUFAF3	3	49057892	49060928	4.85973e-05	-2.09007	0	0	127	1.8742e-15	0	eQTLGen_cis_eQTLs:GTEx/v8/Adipose_Subcutaneous:GTEx/v8/Esophagus_Gastroesophageal_Junction:GTEx/v8/Lung:GTEx/v8/Muscle_Skeletal:GTEx/v8/Cells_Cultured_fibroblasts	+	Yes	Promoter_anchored_loops:Adult_Cortex:Fetal_Cortex	1.95416e-17	rs11720264;rs4768;rs13100903;rs11720264:rs7648987:rs2526754;rs11712056:rs2526754:rs12631248:rs4768	54
ENSG00000131115	ZNF227	19	44711700	44741421	1.6916e-05	0.35023	0	0	2	2.5712e-06	0.0188531	eQTLGen_trans_eQTLs	+	No	NA	2.08573e-17	rs7144011	176
ENSG00000165417	GTF2A1	14	81641796	81687721	0.956765	-1.84204	0	0	0	NA	NA	NA	NA	Yes	Left_Ventricle:IMR90:Mesenchymal_Stem_Cell:Mesendoderm:Trophoblast-like_Cell:hESC	2.23162e-17	rs2197990:rs7144011:rs8021408	176
ENSG00000088543	C3orf18	3	50595462	50608458	0.014308	-1.53819	0	0	35	6.55687e-06	3.44882e-09	GTEx/v8/Artery_Tibial:GTEx/v8/Muscle_Skeletal:GTEx/v8/Thyroid	+	Yes	Promoter_anchored_loops	2.54776e-17	rs4768;rs2280405;rs2188151;rs2188151:rs11712056:rs12631248	54
ENSG00000114302	PRKAR2A	3	48782030	48885279	0.983251	-2.8684	0	0	17	9.74915e-05	0.000280163	PsychENCODE_eQTLs:GTEx/v8/Adipose_Subcutaneous:GTEx/v8/Breast_Mammary_Tissue	-	Yes	Adult_Cortex	2.54776e-17	rs11720264;rs4768	54
ENSG00000225399	RP11-3B7.1	3	49297518	49298744	NA	NA	1	2.087	233	3.88817e-13	8.04195e-19	eQTLcatalogue/TwinsUK_ge_fat:GTEx/v8/Adipose_Visceral_Omentum:GTEx/v8/Artery_Aorta:GTEx/v8/Artery_Coronary:GTEx/v8/Artery_Tibial:GTEx/v8/Brain_Anterior_cingulate_cortex_BA24:GTEx/v8/Colon_Sigmoid:GTEx/v8/Esophagus_Gastroesophageal_Junction:GTEx/v8/Esophagus_Mucosa:GTEx/v8/Esophagus_Muscularis:GTEx/v8/Heart_Atrial_Appendage:GTEx/v8/Heart_Left_Ventricle:GTEx/v8/Lung:GTEx/v8/Muscle_Skeletal:GTEx/v8/…	+	No	NA	2.54776e-17	rs11720264;rs4768;rs12631248;rs13100903;rs2624847;rs2014830;rs6446298	54
ENSG00000114316	USP4	3	49315264	49378145	6.20194e-07	NA	4	4.709	266	1.0462e-11	0	eQTLcatalogue/CEDAR_T-cell_CD4:eQTLcatalogue/Fairfax_2014_IFN24:eQTLcatalogue/Fairfax_2014_naive:eQTLcatalogue/Quach_2016_ge_monocyte_LPS:eQTLcatalogue/Quach_2016_ge_monocyte_Pam3CSK4:eQTLcatalogue/Quach_2016_ge_monocyte_R848:PsychENCODE_eQTLs:DICE/T_CD4_TH1_17:eQTLGen_cis_eQTLs:GTEx/v8/Muscle_Skeletal:GTEx/v8/Testis	+	Yes	Promoter_anchored_loops	2.54776e-17	rs11720264;rs7648987;rs2526754;rs11712056;rs13100903;rs2188151;rs4768;rs12631248	54
ENSG00000176014	TUBB6	18	12307668	12344319	0.000511267	NA	0	0	2	9.5124e-08	0.00108256	eQTLGen_trans_eQTLs	-	No	NA	2.74307e-17	rs3810291	228
ENSG00000142230	SAE1	19	47616531	47713886	0.988952	-1.11521	26	21	72	1.2026e-70	0	eQTLcatalogue/CEDAR_platelet:eQTLcatalogue/GEUVADIS_ge_LCL:eQTLcatalogue/Lepik_2017_ge_blood:eQTLcatalogue/TwinsUK_ge_fat:eQTLGen_cis_eQTLs:BIOSQTL/BIOS_eQTL_geneLevel:GTEx/v8/Adipose_Subcutaneous:GTEx/v8/Cells_EBV-transformed_lymphocytes:GTEx/v8/Whole_Blood:GTEx/v8/Artery_Tibial:GTEx/v8/Brain_Caudate_basal_ganglia:GTEx/v8/Heart_Atrial_Appendage:GTEx/v8/Heart_Left_Ventricle:GTEx/v8/Muscle_Skeleta…	-	Yes	EP_correlation_cell_type_oneway:EP_correlation_organ_oneway:Aorta:Left_Ventricle:Liver:Spleen:GM12878:IMR90:Mesenchymal_Stem_Cell:Mesendoderm:Neural_Progenitor_Cell:Trophoblast-like_Cell:hESC	2.74307e-17	rs3810291;rs309193;rs177918;rs3745615;rs309193:rs3745615:rs3810291	228
ENSG00000130749	ZC3H4	19	47567444	47617009	1	-0.85506	57	21	68	1.909e-40	0	eQTLcatalogue/Fairfax_2014_LPS24:eQTLGen_cis_eQTLs:GTEx/v8/Nerve_Tibial	-	Yes	EP_correlation_cell_type_oneway:EP_correlation_organ_oneway:Aorta:Left_Ventricle:Liver:Spleen:GM12878:IMR90:Mesenchymal_Stem_Cell:Mesendoderm:Neural_Progenitor_Cell:Trophoblast-like_Cell:hESC	2.74307e-17	rs3745615;rs3810291;rs177918;rs309193;rs309193:rs3745615:rs3810291	228
ENSG00000162104	ADCY9	16	4003388	4166186	0.97431	1.36489	39	6.062	36	1.3551e-48	0	eQTLcatalogue/Fairfax_2014_naive:PsychENCODE_eQTLs:eQTLGen_cis_eQTLs:BIOSQTL/BIOS_eQTL_geneLevel:CMC_SVA_cis:GTEx/v8/Adipose_Visceral_Omentum:GTEx/v8/Esophagus_Mucosa:GTEx/v8/Esophagus_Muscularis:GTEx/v8/Nerve_Tibial:GTEx/v8/Pancreas:GTEx/v8/Skin_Not_Sun_Exposed_Suprapubic:GTEx/v8/Skin_Sun_Exposed_Lower_leg:GTEx/v8/Testis:GTEx/v8/Thyroid	+	Yes	Aorta:Left_Ventricle:Liver:Spleen:GM12878:IMR90:Mesenchymal_Stem_Cell:Mesendoderm:Trophoblast-like_Cell:hESC	2.80443e-17	rs7189777;rs2531995;rs2240735;rs2444217;rs7189777:rs2531995:rs2444217:rs8056889	193;194
ENSG00000005339	CREBBP	16	3775055	3930727	1	NA	0	0	0	NA	NA	NA	NA	Yes	Adult_Cortex:IMR90:Mesenchymal_Stem_Cell:Mesendoderm	2.80443e-17	rs2531995:rs7189777:rs2444217	193
ENSG00000213918	DNASE1	16	3661729	3730144	1.00615e-11	0.676275	0	0	0	NA	NA	NA	NA	Yes	Left_Ventricle:Liver:GM12878:IMR90:Mesenchymal_Stem_Cell:hESC	2.80443e-17	rs7189777:rs2531995:rs2444217	193
ENSG00000126603	GLIS2	16	4364762	4389598	0.953068	-1.75727	0	0	6	4.00141e-06	0.00810282	GTEx/v8/Skin_Not_Sun_Exposed_Suprapubic	+	Yes	Promoter_anchored_loops:IMR90:Mesenchymal_Stem_Cell	2.80443e-17	rs7189777;rs2444217:rs7189777:rs2531995	193
ENSG00000262621	NAA60	16	3415099	3536960	NA	0.828474	0	0	0	NA	NA	NA	NA	Yes	Mesenchymal_Stem_Cell	2.80443e-17	rs7189777:rs2531995:rs2444217	193
ENSG00000188827	SLX4	16	3631182	3661599	8.9032e-08	-0.111653	0	0	0	NA	NA	NA	NA	Yes	Left_Ventricle:Liver:GM12878:IMR90:Mesenchymal_Stem_Cell:hESC	2.80443e-17	rs7189777:rs2531995:rs2444217	193
ENSG00000185739	SRL	16	4239375	4292081	0.00123343	1.16056	0	0	4	2.5666e-05	1.93401e-06	DICE/T_CD8_naive:GTEx/v8/Heart_Left_Ventricle	-	Yes	GM12878:IMR90:Mesenchymal_Stem_Cell:Mesendoderm:hESC	2.80443e-17	rs2444217;rs7189777;rs7189777:rs2531995:rs2444217	193
ENSG00000090447	TFAP4	16	4307187	4323076	0.978529	NA	0	0	0	NA	NA	NA	NA	Yes	Promoter_anchored_loops:IMR90:Mesenchymal_Stem_Cell	2.80443e-17	rs2444217:rs1876359:rs1876359;rs8056889:rs7189777:rs2531995	193;194
ENSG00000126602	TRAP1	16	3701640	3767598	1.62038e-17	NA	0	0	7	1.4141e-06	0.00425636	eQTLcatalogue/TwinsUK_ge_skin:eQTLGen_cis_eQTLs	+	Yes	IMR90:Mesenchymal_Stem_Cell	2.80443e-17	rs2444217;rs7189777:rs2531995:rs2444217	193
ENSG00000103343	ZNF174	16	3451235	3459370	0.0530329	-0.715143	0	0	0	NA	NA	NA	NA	Yes	Adult_Cortex	2.80443e-17	rs2531995	193
ENSG00000140987	ZSCAN32	16	3432085	3451065	1.15988e-05	0.299534	0	0	0	NA	NA	NA	NA	Yes	Adult_Cortex	2.80443e-17	rs2531995	193
ENSG00000122012	SV2C	5	75378997	75649764	6.35694e-05	0.60963	0	0	27	6.43176e-05	0.00572275	PsychENCODE_eQTLs	-	Yes	GM12878:IMR90:Mesenchymal_Stem_Cell:Mesendoderm:hESC	3.14139e-17	rs2307111;rs2047059;rs17649350;rs258496;rs17649350:rs2303647:rs11957690:rs7708899:rs7710706:rs9942407	78
ENSG00000124493	GRM4	6	33989628	34123399	0.97935	-0.635219	0	0	0	NA	NA	NA	NA	Yes	Adult_Cortex:Fetal_Cortex:Spleen:GM12878:IMR90:Mesenchymal_Stem_Cell:Mesendoderm:hESC	3.27368e-17	rs11754548:rs6457796:rs6939345:rs2814944:rs7742443:rs3822921	90
ENSG00000270800	RPS10-NUDT3	6	34256547	34393825	NA	NA	0	0	20	2.7904e-20	1.3952e-16	eQTLcatalogue/CEDAR_platelet:PsychENCODE_eQTLs	+	Yes	Promoter_anchored_loops:Left_Ventricle:IMR90:Mesenchymal_Stem_Cell:Mesendoderm:Trophoblast-like_Cell:hESC	3.27368e-17	rs7742369;rs7742443;rs7742369:rs1150781:rs2814944:rs3822921	90
ENSG00000168234	TTC39C	18	21572737	21715574	0.0146469	NA	0	0	23	2.1881e-07	2.58955e-24	eQTLGen_cis_eQTLs:GTEx/v8/Esophagus_Muscularis	-	No	NA	3.81828e-17	rs4800452;rs11662237;rs11663645;rs7228616;rs1788785;rs891387	216
ENSG00000171634	BPTF	17	65821640	65980494	1	0.115492	228	15.96	374	8.97981e-23	0	eQTLcatalogue/GENCORD_ge_LCL:eQTLcatalogue/GEUVADIS_ge_LCL:eQTLcatalogue/TwinsUK_ge_LCL:PsychENCODE_eQTLs:eQTLGen_cis_eQTLs:xQTLServer_eQTLs:CMC_SVA_cis:GTEx/v8/Cells_EBV-transformed_lymphocytes:GTEx/v8/Artery_Aorta:GTEx/v8/Brain_Caudate_basal_ganglia:GTEx/v8/Brain_Cerebellar_Hemisphere:GTEx/v8/Brain_Cerebellum:GTEx/v8/Esophagus_Muscularis:GTEx/v8/Heart_Atrial_Appendage:GTEx/v8/Heart_Left_Ventric…	-	No	NA	4.0479e-17	rs8079078;rs7212293	214
ENSG00000108950	FAM20A	17	66531254	66597530	0.00250112	NA	0	0	0	NA	NA	NA	NA	Yes	Left_Ventricle:Mesenchymal_Stem_Cell:Mesendoderm:Trophoblast-like_Cell	4.0479e-17	rs7212293:rs7212293;rs8079078	214
ENSG00000182481	KPNA2	17	66031635	66042958	0.72864	-0.336633	62	12.29	341	1.67485e-22	0	eQTLcatalogue/Lepik_2017_ge_blood:eQTLcatalogue/Quach_2016_ge_monocyte_IAV:eQTLcatalogue/Quach_2016_ge_monocyte_LPS:eQTLcatalogue/Quach_2016_ge_monocyte_naive:eQTLcatalogue/Quach_2016_ge_monocyte_Pam3CSK4:eQTLcatalogue/Quach_2016_ge_monocyte_R848:PsychENCODE_eQTLs:eQTLGen_cis_eQTLs:BIOSQTL/BIOS_eQTL_geneLevel:BRAINEAC/TCTX:GTEx/v8/Artery_Tibial:GTEx/v8/Brain_Amygdala:GTEx/v8/Brain_Anterior_cingul…	-	Yes	Adult_Cortex:Fetal_Cortex:GM12878:Mesenchymal_Stem_Cell:Mesendoderm:hESC	4.0479e-17	rs7212293;rs8079078;rs7212293:rs8079078:rs7212293	214
ENSG00000108946	PRKAR1A	17	66507921	66547460	0.999223	-0.526046	0	0	0	NA	NA	NA	NA	Yes	Left_Ventricle:IMR90:Mesenchymal_Stem_Cell:Mesendoderm:Trophoblast-like_Cell:hESC	4.0479e-17	rs7212293:rs7212293;rs8079078:rs8079078	214
ENSG00000070540	WIPI1	17	66417089	66453654	0.5235	NA	0	0	0	NA	NA	NA	NA	Yes	Aorta:Left_Ventricle:Liver:Spleen:GM12878:IMR90:Mesenchymal_Stem_Cell:Mesendoderm:Neural_Progenitor_Cell:Trophoblast-like_Cell:hESC	4.0479e-17	rs7212293:rs7212293;rs8079078:rs8079078	214
ENSG00000176410	DNAJC30	7	73095299	73097783	0.00479828	0.303308	0	0	47	4.5788e-09	3.2019e-13	eQTLGen_cis_eQTLs:GTEx/v8/Testis	-	No	NA	4.42553e-17	rs7811265;rs13230514	110
ENSG00000186665	C17orf58	17	65987217	65989765	0.0821564	0.225875	18	14.14	226	2.42789e-23	1.68126e-20	eQTLcatalogue/CEDAR_transverse_colon:PsychENCODE_eQTLs:CMC_SVA_cis:CMC_NoSVA_cis:GTEx/v8/Heart_Left_Ventricle	+	Yes	Adult_Cortex:Fetal_Cortex:Left_Ventricle:Liver:Right_Ventricle:GM12878:IMR90:Mesenchymal_Stem_Cell:Mesendoderm:Trophoblast-like_Cell:hESC	5.13497e-17	rs7212293;rs8079078;rs8079078:rs7212293	214
ENSG00000114388	NPRL2	3	50384761	50388522	0.345175	-0.107064	0	0	83	4.99068e-05	0.00173064	CMC_SVA_cis:GTEx/v8/Breast_Mammary_Tissue:GTEx/v8/Esophagus_Mucosa:GTEx/v8/Pituitary:GTEx/v8/Thyroid	+	Yes	Adult_Cortex:Fetal_Cortex:IMR90:Mesendoderm:hESC	1.32176e-16	rs4768;rs11720264;rs2624847;rs12631248;rs2526754;rs11712056;rs12631248:rs2526754:rs2188151:rs11712056	54
ENSG00000186577	C6orf1	6	34214157	34217247	0.298719	-0.834304	19	15.93	53	4.787e-14	0	PsychENCODE_eQTLs:eQTLGen_cis_eQTLs:CMC_SVA_cis:CMC_NoSVA_cis:GTEx/v8/Esophagus_Mucosa:GTEx/v8/Esophagus_Muscularis:GTEx/v8/Skin_Not_Sun_Exposed_Suprapubic:GTEx/v8/Skin_Sun_Exposed_Lower_leg:GTEx/v8/Thyroid	+	Yes	Promoter_anchored_loops:Adult_Cortex:Fetal_Cortex	1.42849e-16	rs7742369;rs1150781;rs1150781:rs7742369:rs3822921:rs11754548:rs6457796:rs2814944:rs6939345	90
ENSG00000007866	TEAD3	6	35441374	35464853	NA	0.0454437	0	0	31	4.98871e-07	6.67216e-51	GTEx/v8/Cells_Cultured_fibroblasts:GTEx/v8/Skin_Not_Sun_Exposed_Suprapubic	+	No	NA	1.42849e-16	rs7742443;rs12525532;rs3822921	90
ENSG00000114395	CYB561D2	3	50388126	50395891	0.0147105	-0.298456	0	0	46	1.1059e-06	2.37473e-28	eQTLGen_cis_eQTLs:GTEx/v8/Adipose_Subcutaneous:GTEx/v8/Adipose_Visceral_Omentum:GTEx/v8/Breast_Mammary_Tissue:GTEx/v8/Esophagus_Muscularis:GTEx/v8/Liver:GTEx/v8/Muscle_Skeletal:GTEx/v8/Pancreas:GTEx/v8/Stomach:GTEx/v8/Thyroid	-	Yes	Adult_Cortex:Fetal_Cortex:IMR90:Mesendoderm:hESC	1.50698e-16	rs2526754;rs11712056;rs4768;rs2624847;rs12631248:rs2526754:rs2188151:rs11712056	54
ENSG00000126062	TMEM115	3	50392180	50397041	0.876895	-0.780372	0	0	134	4.54338e-05	0.0203218	GTEx/v8/Adipose_Visceral_Omentum:GTEx/v8/Thyroid	-	Yes	Adult_Cortex:Fetal_Cortex:IMR90:Mesendoderm:hESC	1.79534e-16	rs12631248;rs12631248:rs2526754:rs2188151:rs11712056	54
ENSG00000272104	XXcos-LUCA11.5	3	50388323	50405354	NA	NA	0	0	0	NA	NA	NA	NA	Yes	Adult_Cortex:Fetal_Cortex:IMR90:Mesendoderm:hESC	1.79534e-16	rs12631248:rs2526754:rs2188151:rs11712056	54
ENSG00000106304	SPAM1	7	123565286	123611468	1.2437e-06	-0.131961	0	0	49	4.10805e-21	2.48359e-13	xQTLServer_eQTLs	NA	No	NA	1.81565e-16	rs6446298;rs13100903;rs2014830;rs2188151	54
ENSG00000102978	POLR2C	16	57496299	57505922	0.0470077	-0.594605	0	0	10	9.83594e-06	0.049	eQTLcatalogue/CEDAR_ileum:CMC_NoSVA_cis	-	No	NA	2.49188e-16	rs4783962;rs1366544	200
ENSG00000081189	MEF2C	5	88013975	88199922	0.00424617	-2.66223	7	5.726	506	8.0831e-31	0	eQTLcatalogue/Fairfax_2014_IFN24:eQTLGen_cis_eQTLs	+	Yes	GM12878:IMR90:Mesendoderm:hESC	2.54894e-16	rs2161228;rs7718514;rs6870983;rs2178270;rs992623;rs16903228;rs3814424;rs2161228:rs2178270:rs323781:rs6870983	79
ENSG00000077809	GTF2I	7	74071994	74175026	0.999349	NA	0	0	22	2.204e-190	0	eQTLGen_cis_eQTLs	+	No	NA	2.68221e-16	rs17207196;rs6944634	111
ENSG00000196275	GTF2IRD2	7	74210483	74267847	NA	NA	0	0	50	2.8939e-15	0	eQTLcatalogue/TwinsUK_ge_fat:PsychENCODE_eQTLs:eQTLGen_cis_eQTLs:GTEx/v8/Adipose_Subcutaneous:GTEx/v8/Adipose_Visceral_Omentum:GTEx/v8/Whole_Blood:GTEx/v8/Artery_Aorta:GTEx/v8/Artery_Coronary:GTEx/v8/Artery_Tibial:GTEx/v8/Esophagus_Mucosa:GTEx/v8/Esophagus_Muscularis:GTEx/v8/Heart_Atrial_Appendage:GTEx/v8/Heart_Left_Ventricle:GTEx/v8/Lung:GTEx/v8/Muscle_Skeletal:GTEx/v8/Nerve_Tibial:GTEx/v8/Cells…	+	No	NA	2.68221e-16	rs17207196;rs6944634;rs1167795	111
ENSG00000127946	HIP1	7	75162621	75368280	0.999681	-1.61205	16	7.862	44	3.3288e-79	0	eQTLcatalogue/Lepik_2017_ge_blood:PsychENCODE_eQTLs:eQTLGen_cis_eQTLs:BIOSQTL/BIOS_eQTL_geneLevel:GTEx/v8/Adrenal_Gland	-	Yes	Promoter_anchored_loops	2.68221e-16	rs17207196;rs6944634;rs1167795	111
ENSG00000158517	NCF1	7	74188309	74203659	0.92336	-0.356777	0	0	54	4.633e-163	0	eQTLcatalogue/Fairfax_2014_IFN24:eQTLGen_cis_eQTLs	+	No	NA	2.68221e-16	rs17207196;rs6944634;rs1167795	111
ENSG00000135213	POM121C	7	75046066	75115548	NA	-1.63114	37	13.88	61	0	0	PsychENCODE_eQTLs:DICE/Monocyte_classical:eQTLGen_cis_eQTLs:BIOSQTL/BIOS_eQTL_geneLevel:xQTLServer_eQTLs:CMC_SVA_cis	-	No	NA	2.68221e-16	rs17207196;rs6944634;rs1167795	111
ENSG00000178809	TRIM73	7	75024337	75040279	NA	-0.803456	8	11.29	57	9.4438e-204	0	eQTLGen_cis_eQTLs:BIOSQTL/BIOS_eQTL_geneLevel:GTEx/v8/Adipose_Subcutaneous:GTEx/v8/Adipose_Visceral_Omentum:GTEx/v8/Adrenal_Gland:GTEx/v8/Whole_Blood:GTEx/v8/Artery_Aorta:GTEx/v8/Brain_Cerebellar_Hemisphere:GTEx/v8/Breast_Mammary_Tissue:GTEx/v8/Colon_Sigmoid:GTEx/v8/Esophagus_Mucosa:GTEx/v8/Esophagus_Muscularis:GTEx/v8/Heart_Left_Ventricle:GTEx/v8/Lung:GTEx/v8/Nerve_Tibial:GTEx/v8/Pancreas:GTEx/v…	-	No	NA	2.68221e-16	rs6944634;rs17207196;rs1167795	111
ENSG00000268423	AC011551.3	19	47050313	47104118	NA	NA	0	0	0	NA	NA	NA	NA	Yes	Adult_Cortex:Fetal_Cortex	2.76397e-16	rs3810291:rs177918:rs309193	228
ENSG00000042753	AP2S1	19	47341393	47354249	0.919496	-0.48921	0	0	0	NA	NA	NA	NA	Yes	Adult_Cortex:Fetal_Cortex:IMR90:Mesenchymal_Stem_Cell:Trophoblast-like_Cell:hESC	2.76397e-16	rs3810291:rs177918:rs309193:rs3745615	228
ENSG00000105327	BBC3	19	47724081	47736023	0.0712435	-0.139575	0	0	50	2.78036e-13	0	eQTLcatalogue/BLUEPRINT_ge_T-cell:PsychENCODE_eQTLs:eQTLGen_cis_eQTLs:BIOSQTL/BIOS_eQTL_geneLevel	+	Yes	IMR90:Mesenchymal_Stem_Cell	2.76397e-16	rs3810291;rs309193;rs3745615;rs177918	228
ENSG00000160014	CALM3	19	47104331	47114050	0.580172	NA	0	0	5	5.66031e-06	0.0363405	GTEx/v8/Minor_Salivary_Gland	+	Yes	Adult_Cortex:Fetal_Cortex	2.76397e-16	rs309193;rs3810291:rs177918:rs309193	228
ENSG00000197380	DACT3	19	47150869	47164395	NA	0.23621	0	0	0	NA	NA	NA	NA	Yes	Adult_Cortex:Fetal_Cortex:IMR90:Mesenchymal_Stem_Cell:Trophoblast-like_Cell	2.76397e-16	rs3810291:rs177918:rs309193	228
ENSG00000134815	DHX34	19	47852538	47885961	2.87825e-08	0.238632	0	0	48	1.53733e-09	7.22844e-23	eQTLGen_cis_eQTLs:BIOSQTL/BIOS_eQTL_geneLevel:GTEx/v8/Adipose_Subcutaneous:GTEx/v8/Colon_Sigmoid:GTEx/v8/Skin_Not_Sun_Exposed_Suprapubic	-	Yes	EP_correlation_organ_oneway:Adult_Cortex:Fetal_Cortex	2.76397e-16	rs309193;rs3810291;rs3745615;rs309193:rs3810291:rs177918	228
ENSG00000181027	FKRP	19	47249303	47280245	0.0003828	-1.19601	0	0	0	NA	NA	NA	NA	Yes	Adult_Cortex:Fetal_Cortex:Aorta:Left_Ventricle:Liver:Spleen:GM12878:IMR90:Mesenchymal_Stem_Cell:Mesendoderm:Trophoblast-like_Cell:hESC	2.76397e-16	rs3810291:rs177918:rs309193:rs10423928:rs3745615	227;228
ENSG00000167414	GNG8	19	47137333	47137942	0.147001	NA	0	0	0	NA	NA	NA	NA	Yes	Adult_Cortex:Fetal_Cortex	2.76397e-16	rs3810291:rs177918:rs309193	228
ENSG00000087076	HSD17B14	19	49316274	49339935	0.00137252	0.796635	0	0	0	NA	NA	NA	NA	Yes	Fetal_Cortex:Left_Ventricle	2.76397e-16	rs3810291:rs177918:rs309193	228
ENSG00000130751	NPAS1	19	47523077	47549033	0.916473	NA	10	10.86	0	NA	NA	NA	NA	Yes	Adult_Cortex:Fetal_Cortex:Aorta:Left_Ventricle:Liver:GM12878:IMR90:Mesenchymal_Stem_Cell:Mesendoderm:Neural_Progenitor_Cell:Trophoblast-like_Cell:hESC	2.76397e-16	rs3745615;rs3810291:rs177918:rs309193	228
ENSG00000230510	PPP5D1	19	46984053	47104457	0.039345	NA	0	0	0	NA	NA	NA	NA	Yes	Adult_Cortex:Fetal_Cortex	2.76397e-16	rs3810291:rs177918:rs309193	228
ENSG00000105287	PRKD2	19	47177532	47220384	0.999696	NA	0	0	0	NA	NA	NA	NA	Yes	Adult_Cortex:Fetal_Cortex:Mesenchymal_Stem_Cell	2.76397e-16	rs3810291:rs177918:rs309193	228
ENSG00000257704	PRR24	19	47778142	47778979	NA	NA	0	0	46	3.0658e-33	0	PsychENCODE_eQTLs:eQTLGen_cis_eQTLs:BIOSQTL/BIOS_eQTL_geneLevel	-	Yes	Adult_Cortex	2.76397e-16	rs309193;rs3810291;rs3810291:rs177918	228
ENSG00000118160	SLC8A2	19	47931274	47975425	NA	-0.264691	0	0	0	NA	NA	NA	NA	Yes	Adult_Cortex:Fetal_Cortex	2.76397e-16	rs3810291:rs177918:rs309193	228
ENSG00000090372	STRN4	19	47222764	47250251	0.999575	-0.598775	0	0	0	NA	NA	NA	NA	Yes	Adult_Cortex:Fetal_Cortex:Aorta:Left_Ventricle:Liver:Spleen:GM12878:IMR90:Mesenchymal_Stem_Cell:Mesendoderm:Trophoblast-like_Cell:hESC	2.76397e-16	rs3810291:rs177918:rs309193:rs10423928:rs3745615	227;228
ENSG00000130748	TMEM160	19	47549165	47551888	0.654856	-0.358531	13	10.86	12	1.3238e-12	0	PsychENCODE_eQTLs:eQTLGen_cis_eQTLs	-	Yes	Adult_Cortex:Fetal_Cortex:Aorta:Left_Ventricle:Liver:GM12878:IMR90:Mesenchymal_Stem_Cell:Mesendoderm:Neural_Progenitor_Cell:Trophoblast-like_Cell:hESC	2.76397e-16	rs3745615;rs3810291;rs3810291:rs177918:rs309193	228
ENSG00000158865	SLC5A11	16	24857162	24922949	1.49641e-06	-0.589746	4	2.378	120	3.27167000000001e-310	0	eQTLcatalogue/Kasela_2017_T-cell_CD4:eQTLcatalogue/TwinsUK_ge_skin:eQTLcatalogue/van_de_Bunt_2015_ge_pancreatic_islet:DICE/B_cell_naive:DICE/T_CD4_naive:DICE/T_CD4_naive_activated:DICE/T_CD8_naive:DICE/T_CD8_naive_activated:DICE/Monocyte_classical:DICE/Monocyte_non_classical:DICE/NK:DICE/T_CD4_TFH:DICE/T_CD4_TH1:DICE/T_CD4_TH17:DICE/T_CD4_TH1_17:DICE/T_CD4_TH2:DICE/T_CD4_memory_TREG:DICE/T_CD4_na…	-	No	NA	3.03705e-16	rs189919;rs9302428;rs7186893	196
ENSG00000090905	TNRC6A	16	24741016	24838953	1	-0.954236	85	19.1	89	2.9631e-105	0	eQTLcatalogue/BLUEPRINT_ge_neutrophil:eQTLcatalogue/Fairfax_2014_naive:eQTLcatalogue/Lepik_2017_ge_blood:eQTLGen_cis_eQTLs:BIOSQTL/BIOS_eQTL_geneLevel:GTEx/v8/Whole_Blood:GTEx/v8/Breast_Mammary_Tissue:GTEx/v8/Nerve_Tibial:GTEx/v8/Testis:GTEx/v8/Thyroid	+	Yes	Left_Ventricle:Liver:IMR90:Mesenchymal_Stem_Cell:Mesendoderm:hESC	3.03705e-16	rs189919;rs7186893;rs9302428;rs7186893:rs189919:rs9302428	196
ENSG00000063180	CA11	19	49141199	49149569	0.976097	-0.946175	0	0	0	NA	NA	NA	NA	Yes	Left_Ventricle	3.05947e-16	rs3810291:rs177918:rs309193	228
ENSG00000105516	DBP	19	49133287	49140695	0.820194	-1.09161	0	0	0	NA	NA	NA	NA	Yes	Left_Ventricle	3.05947e-16	rs3810291:rs177918:rs309193	228
ENSG00000063177	RPL18	19	49118585	49122793	0.554781	-0.936372	0	0	0	NA	NA	NA	NA	Yes	Left_Ventricle	3.05947e-16	rs3810291:rs177918:rs309193	228
ENSG00000105281	SLC1A5	19	47278140	47291851	0.0518112	-0.14107	0	0	0	NA	NA	NA	NA	Yes	EP_correlation_cell_type_oneway:Fetal_Cortex:Left_Ventricle:IMR90:Mesenchymal_Stem_Cell:Trophoblast-like_Cell:hESC	3.05947e-16	rs309193:rs3810291:rs177918:rs3745615	228
ENSG00000063176	SPHK2	19	49122548	49133974	8.66424e-06	-1.64118	0	0	0	NA	NA	NA	NA	Yes	Left_Ventricle	3.05947e-16	rs3810291:rs177918:rs309193	228
ENSG00000204188	GGNBP1	6	33551515	33556803	NA	NA	0	0	0	NA	NA	NA	NA	Yes	Adult_Cortex:Fetal_Cortex	3.63409e-16	rs6939345:rs11754548:rs6457796	90
ENSG00000237649	KIFC1	6	33359313	33377701	0.015578	-0.29917	0	0	0	NA	NA	NA	NA	Yes	Fetal_Cortex:GM12878:IMR90	3.63409e-16	rs11754548:rs6457796:rs9277972	89;90
ENSG00000106077	ABHD11	7	73150424	73153197	9.03291e-06	0.148518	0	0	20	8.7372e-17	0	eQTLGen_cis_eQTLs:BIOSQTL/BIOS_eQTL_geneLevel:GTEx/v8/Prostate	-	Yes	Promoter_anchored_loops	4.45568e-16	rs13230514;rs13244268;rs7811265	110
ENSG00000106682	EIF4H	7	73588575	73611431	0.922545	-1.50043	0	0	0	NA	NA	NA	NA	Yes	Promoter_anchored_loops:Adult_Cortex	4.45568e-16	rs7811265:rs13244268	110
ENSG00000185905	C16orf54	16	29753784	29757327	0.668081	1.27091	0	0	116	7.1431e-37	0	eQTLcatalogue/CEDAR_neutrophil_CD15:eQTLcatalogue/CEDAR_T-cell_CD4:eQTLcatalogue/Fairfax_2014_naive:eQTLGen_cis_eQTLs	+	Yes	GM12878	4.93255e-16	rs12917712;rs4787480;rs2887799;rs7201780	198
ENSG00000258130	RP11-347C12.3	16	30215637	30220392	NA	NA	0	0	85	6.64733e-09	1.18504e-05	BIOSQTL/BIOS_eQTL_geneLevel:GTEx/v8/Adipose_Visceral_Omentum:GTEx/v8/Brain_Cortex:GTEx/v8/Skin_Sun_Exposed_Lower_leg	+	No	NA	4.93255e-16	rs2887799;rs7201780;rs4238961;rs4787480;rs11150604	198
ENSG00000180035	ZNF48	16	30389427	30411429	0.0324251	NA	1	12.92	46	4.30569e-09	5.98086e-06	BIOSQTL/BIOS_eQTL_geneLevel	-	Yes	Promoter_anchored_loops:Adult_Cortex:Fetal_Cortex:Left_Ventricle:Liver:Right_Ventricle:GM12878:IMR90:Mesenchymal_Stem_Cell:Mesendoderm:Trophoblast-like_Cell:hESC	4.93255e-16	rs4238961;rs2887799;rs7201780;rs4787491:rs12448482:rs3814883:rs7186852:rs8063565:rs7184567;rs8063565;rs11150596:rs8063565;rs7186852:rs8047664:rs4787480:rs2005219:rs7184567;rs11150596	197;198
ENSG00000143595	AQP10	1	154293566	154297801	0.0152783	-0.980404	0	0	15	1.9821e-180	0	eQTLGen_trans_eQTLs	-	No	NA	5.31474e-16	rs7075195	138
ENSG00000182795	C1orf116	1	207191866	207206101	0.371958	-0.290448	0	0	6	3.6815e-06	0.0257427	eQTLGen_trans_eQTLs	+	No	NA	5.31474e-16	rs7075195	138
ENSG00000119280	C1orf198	1	230972865	231005335	0.0273753	0.0384408	0	0	13	3.7679e-08	0.000500214	eQTLGen_trans_eQTLs	+	No	NA	5.31474e-16	rs7075195	138
ENSG00000162598	C1orf87	1	60452941	60539442	1.57688e-17	-0.34916	0	0	14	6.6049e-08	0.000854006	eQTLGen_trans_eQTLs	+	No	NA	5.31474e-16	rs7075195	138
ENSG00000162852	CNST	1	246729746	246831886	0.925063	-0.772185	0	0	14	3.8197e-13	0	eQTLGen_trans_eQTLs	+	No	NA	5.31474e-16	rs7075195	138
ENSG00000159348	CYB5R1	1	202930997	202936408	9.32777e-09	NA	0	0	15	1.0983e-11	0	eQTLGen_trans_eQTLs	-	Yes	IMR90	5.31474e-16	rs7075195;rs1032524:rs8024	23;138
ENSG00000162496	DHRS3	1	12627939	12677737	0.66136	1.37192	0	0	6	4.7896e-06	0.0317755	eQTLGen_trans_eQTLs	+	No	NA	5.31474e-16	rs7075195	138
ENSG00000197959	DNM3	1	171810621	172387606	0.028277	-0.434631	0	0	12	4.5898e-09	0.000121972	eQTLGen_trans_eQTLs	+	No	NA	5.31474e-16	rs7075195	138
ENSG00000117691	NENF	1	212606229	212619714	0.002991	-0.264492	0	0	15	1.8012e-10	0	eQTLGen_trans_eQTLs	-	No	NA	5.31474e-16	rs7075195	138
ENSG00000187800	PEAR1	1	156863490	156886226	1.18896e-14	0.0341063	0	0	13	4.2994e-07	0.00386243	eQTLGen_trans_eQTLs	-	No	NA	5.31474e-16	rs7075195	138
ENSG00000092621	PHGDH	1	120202421	120286838	0.000436999	-0.0590143	0	0	5	9.1822e-07	0.0076238	eQTLGen_trans_eQTLs	-	No	NA	5.31474e-16	rs7075195	138
ENSG00000142949	PTPRF	1	43990858	44089343	0.999998	-1.11692	0	0	15	6.1816e-12	0	eQTLGen_trans_eQTLs	+	No	NA	5.31474e-16	rs7075195	138
ENSG00000150681	RGS18	1	192127587	192154945	0.0908284	-0.786493	0	0	13	6.8897e-10	2.04165e-05	eQTLGen_trans_eQTLs	+	No	NA	5.31474e-16	rs7075195	138
ENSG00000174175	SELP	1	169558087	169599431	4.62465e-20	-0.517339	0	0	15	1.1461e-22	0	eQTLGen_trans_eQTLs	-	No	NA	5.31474e-16	rs7075195	138
ENSG00000134668	SPOCD1	1	32256023	32281652	8.799e-06	0.267641	0	0	15	4.4884e-48	0	eQTLGen_trans_eQTLs	+	No	NA	5.31474e-16	rs7075195	138
ENSG00000117586	TNFSF4	1	173152873	173176452	0.12523	0.177868	0	0	15	2.0522e-25	0	eQTLGen_trans_eQTLs	+	No	NA	5.31474e-16	rs7075195	138
ENSG00000115457	IGFBP2	2	217497551	217529159	0.844354	NA	0	0	15	8.8171e-12	0	eQTLGen_trans_eQTLs	-	No	NA	5.31474e-16	rs7075195	138
ENSG00000143995	MEIS1	2	66660584	66801001	0.990885	-1.50087	0	0	15	1.6263e-13	0	eQTLGen_trans_eQTLs	+	Yes	Aorta:Left_Ventricle:Liver:Lung:GM12878:IMR90:Mesenchymal_Stem_Cell:Mesendoderm:Neural_Progenitor_Cell:Trophoblast-like_Cell:hESC	5.31474e-16	rs7075195;rs2861688:rs2861688;rs4671193	34;138
ENSG00000228474	OST4	2	27293340	27294641	NA	NA	0	0	15	2.6429e-10	0	eQTLGen_trans_eQTLs	+	Yes	Adult_Cortex:Fetal_Cortex:Liver:GM12878:IMR90:Mesenchymal_Stem_Cell:Mesendoderm:Trophoblast-like_Cell:hESC	5.31474e-16	rs7075195;rs7586601	29;138
ENSG00000168497	SDPR	2	192699028	192711981	0.000704633	-0.634204	0	0	18	3.8301e-10	2.06996e-05	eQTLGen_trans_eQTLs	-	No	NA	5.31474e-16	rs7075195;rs4800452	138;216
ENSG00000138449	SLC40A1	2	190425305	190448484	0.977595	-0.0382238	0	0	15	2.8372e-08	0.000384218	eQTLGen_trans_eQTLs	+	No	NA	5.31474e-16	rs7075195	138
ENSG00000144677	CTDSPL	3	37903451	38025960	0.0888482	-0.619807	0	0	15	3.1084e-19	0	eQTLGen_trans_eQTLs	-	No	NA	5.31474e-16	rs7075195	138
ENSG00000113924	HGD	3	120347020	120401418	6.42452e-05	-0.551551	0	0	15	9.8179e-22	0	eQTLGen_trans_eQTLs	-	No	NA	5.31474e-16	rs7075195	138
ENSG00000082781	ITGB5	3	124480795	124620265	0.000480019	1.25334	0	0	15	1.1461e-22	0	eQTLGen_trans_eQTLs	-	No	NA	5.31474e-16	rs7075195	138
ENSG00000074416	MGLL	3	127407909	127542051	0.00459891	-0.852019	0	0	15	5.3861e-23	0	eQTLGen_trans_eQTLs	-	No	NA	5.31474e-16	rs7075195	138
ENSG00000065534	MYLK	3	123328896	123603178	9.3792e-06	0.303166	0	0	16	1.7487e-11	0	eQTLGen_trans_eQTLs:BIOSQTL/BIOS_eQTL_geneLevel	+	No	NA	5.31474e-16	rs7075195;rs1456116	60;138
ENSG00000180914	OXTR	3	8792094	8811314	5.74323e-05	0.437926	0	0	15	4.2978e-31	0	eQTLGen_trans_eQTLs	+	Yes	IMR90:Mesenchymal_Stem_Cell:Trophoblast-like_Cell	5.31474e-16	rs7075195;rs2596933	46;138
ENSG00000169313	P2RY12	3	151055168	151102600	0.107032	-0.130012	0	0	4	3.7064e-06	0.0258802	eQTLGen_trans_eQTLs	+	No	NA	5.31474e-16	rs7075195	138
ENSG00000184500	PROS1	3	93591881	93692910	0.000209234	-0.863077	0	0	174	3.0448e-14	0	PsychENCODE_eQTLs:eQTLGen_cis_eQTLs:eQTLGen_trans_eQTLs:CMC_SVA_cis:CMC_NoSVA_cis:GTEx/v8/Adipose_Subcutaneous:GTEx/v8/Heart_Atrial_Appendage:GTEx/v8/Heart_Left_Ventricle:GTEx/v8/Cells_Cultured_fibroblasts:GTEx/v8/Skin_Sun_Exposed_Lower_leg	-	Yes	Mesendoderm	5.31474e-16	rs1580099;rs17816812;rs7075195;rs33970442;rs33970442:rs1580099	59;138
ENSG00000154917	RAB6B	3	133543083	133614680	0.893311	-0.675105	0	0	15	2.7532e-11	0	eQTLGen_trans_eQTLs	-	No	NA	5.31474e-16	rs7075195	138
ENSG00000151789	ZNF385D	3	21459915	22414812	0.724322	0.203413	0	0	15	4.4834e-25	0	eQTLGen_trans_eQTLs	+	No	NA	5.31474e-16	rs7075195	138
ENSG00000163735	CXCL5	4	74861359	74864496	0.000222602	0.320595	0	0	15	2.1923e-98	0	eQTLGen_trans_eQTLs	-	No	NA	5.31474e-16	rs7075195	138
ENSG00000138798	EGF	4	110834040	110933422	7.01333e-12	-0.065199	0	0	12	2.2046e-07	0.00214547	eQTLGen_trans_eQTLs	-	No	NA	5.31474e-16	rs7075195	138
ENSG00000164116	GUCY1A3	4	156587863	156653501	1.41369e-06	1.52086	0	0	15	1.6232e-20	0	eQTLGen_trans_eQTLs	-	No	NA	5.31474e-16	rs7075195	138
ENSG00000061918	GUCY1B3	4	156680144	156728743	0.000916634	-0.241662	0	0	15	1.9162e-08	0.00024604	eQTLGen_trans_eQTLs	-	No	NA	5.31474e-16	rs7075195;rs4800452	138;216
ENSG00000198948	MFAP3L	4	170907748	170954182	0.91053	1.02991	0	0	15	6.8098e-13	0	eQTLGen_trans_eQTLs	+	No	NA	5.31474e-16	rs7075195	138
ENSG00000138722	MMRN1	4	90800683	90875780	9.35082e-17	0.246502	0	0	15	3.4866e-11	0	eQTLGen_trans_eQTLs	-	No	NA	5.31474e-16	rs7075195	138
ENSG00000109272	PF4V1	4	74718906	74719872	0.00689209	0.164677	0	0	15	1.5709e-17	0	eQTLGen_trans_eQTLs	-	No	NA	5.31474e-16	rs7075195	138
ENSG00000163736	PPBP	4	74852755	74853914	0.267236	-0.0732286	0	0	18	9.1936e-30	0	eQTLGen_trans_eQTLs	-	No	NA	5.31474e-16	rs7075195;rs4800452	138;216
ENSG00000173210	ABLIM3	5	148521046	148640105	0.0160253	-0.596093	0	0	15	4.8981e-11	0	eQTLGen_trans_eQTLs	-	No	NA	5.31474e-16	rs7075195	138
ENSG00000123505	AMD1	6	111195973	111216916	0.903414	-0.689405	0	0	15	1.0767e-09	3.93623e-05	eQTLGen_trans_eQTLs	+	No	NA	5.31474e-16	rs7075195	138
ENSG00000153162	BMP6	6	7727030	7881655	0.895082	-0.00516926	0	0	15	5.4751e-19	0	eQTLGen_trans_eQTLs	+	No	NA	5.31474e-16	rs7075195	138
ENSG00000124762	CDKN1A	6	36644305	36655116	0.0272026	-0.171688	0	0	11	9.2574e-07	0.00771563	eQTLGen_trans_eQTLs	-	No	NA	5.31474e-16	rs7075195	138
ENSG00000123500	COL10A1	6	116440086	116479910	6.3584e-05	-0.141903	0	0	5	1.0609e-06	0.0086005	eQTLGen_trans_eQTLs	-	No	NA	5.31474e-16	rs7075195	138
ENSG00000124491	F13A1	6	6144318	6321246	0.00102736	0.8944	0	0	15	1.1167e-11	0	eQTLGen_trans_eQTLs	-	No	NA	5.31474e-16	rs7075195	138
ENSG00000168274	HIST1H2AE	6	26217165	26217711	0.624124	-0.273878	5	10.82	156	1.7146e-86	0	eQTLGen_cis_eQTLs:eQTLGen_trans_eQTLs:BIOSQTL/BIOS_eQTL_geneLevel	-	Yes	Adult_Cortex:Fetal_Cortex:Left_Ventricle:Liver:GM12878:IMR90:Mesenchymal_Stem_Cell:Neural_Progenitor_Cell:Trophoblast-like_Cell:hESC	5.31474e-16	rs806794;rs4145878;rs707896;rs9379831;rs6916289;rs2893843;rs7075195;rs707896:rs2066295:rs6916289:rs2893843:rs806794:rs1009181:rs9379831	88;138
ENSG00000197459	HIST1H2BH	6	26251879	26252303	0.00029573	-0.173874	2	2.061	63	2.1715e-11	0	eQTLGen_cis_eQTLs:eQTLGen_trans_eQTLs	+	Yes	Adult_Cortex:Fetal_Cortex:Aorta:Left_Ventricle:Liver:GM12878:IMR90:Mesenchymal_Stem_Cell:Neural_Progenitor_Cell:Trophoblast-like_Cell:hESC	5.31474e-16	rs806794;rs2893843;rs7075195;rs6916289:rs707896:rs2066295:rs2893843:rs806794:rs1009181:rs9379831	88;138
ENSG00000172426	RSPH9	6	43612783	43640336	0.00490038	1.06309	0	0	13	6.177e-08	0.000817996	eQTLGen_trans_eQTLs	-	Yes	Promoter_anchored_loops	5.31474e-16	rs7075195;rs998584	92;138
ENSG00000198478	SH3BGRL2	6	80341000	80413372	7.16872e-06	0.561378	0	0	18	1.8931e-20	0	eQTLGen_trans_eQTLs	-	Yes	Fetal_Cortex:Left_Ventricle:Liver:GM12878:IMR90:Mesenchymal_Stem_Cell:Mesendoderm:Neural_Progenitor_Cell:Trophoblast-like_Cell:hESC	5.31474e-16	rs7075195;rs4800452;rs1507153	95;138;216
ENSG00000161911	TREML1	6	41117080	41122075	1.00255e-05	0.0579731	0	0	15	1.3472e-15	0	eQTLGen_trans_eQTLs	-	No	NA	5.31474e-16	rs7075195	138
ENSG00000105971	CAV2	7	115927434	116148595	0.00411638	0.222321	0	0	88	6.0936e-17	0	PsychENCODE_eQTLs:eQTLGen_cis_eQTLs:eQTLGen_trans_eQTLs:CMC_SVA_cis	+	No	NA	5.31474e-16	rs2237717;rs41741;rs7075195	116;138
ENSG00000180354	MTURN	7	30174426	30202378	0.306492	0.454226	0	0	15	4.1746e-38	0	eQTLGen_trans_eQTLs	-	No	NA	5.31474e-16	rs7075195	138
ENSG00000005249	PRKAR2B	7	106685094	106802256	0.995321	-0.709766	0	0	12	9.2357e-09	0.000164042	eQTLGen_trans_eQTLs	-	No	NA	5.31474e-16	rs7075195	138
ENSG00000122679	RAMP3	7	45197390	45225901	0.00952875	1.13215	0	0	15	4.4604e-10	2.02265e-05	eQTLGen_trans_eQTLs	-	No	NA	5.31474e-16	rs7075195	138
ENSG00000120885	CLU	8	27454434	27472548	NA	0.0733593	0	0	15	2.241e-12	0	eQTLGen_trans_eQTLs	-	No	NA	5.31474e-16	rs7075195	138
ENSG00000205038	PKHD1L1	8	110374706	110542559	9.12623e-65	-0.316581	0	0	14	2.3804e-08	0.000316313	eQTLGen_trans_eQTLs	-	No	NA	5.31474e-16	rs7075195	138
ENSG00000078668	VDAC3	8	42249142	42263415	0.970696	NA	0	0	8	7.8911e-08	0.000999201	eQTLGen_trans_eQTLs	+	No	NA	5.31474e-16	rs7075195	138
ENSG00000172159	FRMD3	9	85857905	86153461	0.195215	1.91952	0	0	15	3.3844e-22	0	eQTLGen_trans_eQTLs	+	No	NA	5.31474e-16	rs7075195	138
ENSG00000095303	PTGS1	9	125132824	125157982	6.41263e-06	0.939054	0	0	15	1.741e-12	0	eQTLGen_trans_eQTLs	-	No	NA	5.31474e-16	rs7075195	138
ENSG00000137076	TLN1	9	35696945	35732392	1	-0.393463	0	0	15	3.6151e-10	2.0496e-05	eQTLGen_trans_eQTLs	-	No	NA	5.31474e-16	rs7075195	138
ENSG00000095739	BAMBI	10	28966271	28971868	0.00217666	NA	0	0	15	3.6058e-10	2.05592e-05	eQTLGen_trans_eQTLs	+	No	NA	5.31474e-16	rs7075195	138
ENSG00000151023	ENKUR	10	25270908	25305089	9.60808e-06	0.547366	0	0	15	2.7248e-25	0	eQTLGen_trans_eQTLs	+	No	NA	5.31474e-16	rs7075195	138
ENSG00000171988	JMJD1C	10	64926981	65225722	1	-0.552974	182	20.3	372	8.6408e-11	0	eQTLcatalogue/Fairfax_2014_IFN24:PsychENCODE_eQTLs:eQTLGen_cis_eQTLs:CMC_SVA_cis:GTEx/v8/Esophagus_Mucosa:GTEx/v8/Lung:GTEx/v8/Nerve_Tibial:GTEx/v8/Cells_Cultured_fibroblasts:GTEx/v8/Skin_Not_Sun_Exposed_Suprapubic:GTEx/v8/Skin_Sun_Exposed_Lower_leg:GTEx/v8/Thyroid	+	Yes	Adult_Cortex:Fetal_Cortex:Aorta:Bladder:Dorsolateral_Prefrontal_Cortex:Hippocampus:Left_Ventricle:Liver:Right_Ventricle:GM12878:IMR90:Mesenchymal_Stem_Cell:Mesendoderm:Neural_Progenitor_Cell:Trophoblast-like_Cell:hESC	5.31474e-16	rs9804238;rs7075195;rs10822123;rs3858122;rs9804238:rs7075195:rs3858122	138
ENSG00000148572	NRBF2	10	64893050	64914783	0.0821062	-0.409713	22	13.93	415	0	0	eQTLcatalogue/CEDAR_B-cell_CD19:eQTLcatalogue/CEDAR_monocyte_CD14:eQTLcatalogue/CEDAR_neutrophil_CD15:eQTLcatalogue/CEDAR_rectum:eQTLcatalogue/CEDAR_T-cell_CD4:eQTLcatalogue/CEDAR_T-cell_CD8:eQTLcatalogue/Fairfax_2012_B-cell_CD19:eQTLcatalogue/Fairfax_2014_IFN24:eQTLcatalogue/Fairfax_2014_LPS24:eQTLcatalogue/Fairfax_2014_LPS2:eQTLcatalogue/Fairfax_2014_naive:eQTLcatalogue/Kasela_2017_T-cell_CD4:e…	-	Yes	Aorta:Left_Ventricle:Liver:GM12878:IMR90:Mesenchymal_Stem_Cell:Mesendoderm:hESC	5.31474e-16	rs9804238;rs7075195;rs3858122;rs10822123;rs7075195:rs9804238:rs3858122:rs10822123	138
ENSG00000107438	PDLIM1	10	96997329	97050781	1.38008e-05	NA	0	0	51	2.9121e-13	0	eQTLGen_cis_eQTLs:eQTLGen_trans_eQTLs	+	Yes	Left_Ventricle:IMR90:hESC	5.31474e-16	rs11187845;rs7075195	138;142
ENSG00000165476	REEP3	10	65281123	65384883	0.0129813	1.39842	122	15.42	419	8.9431e-57	0	eQTLcatalogue/BrainSeq_ge_brain:eQTLcatalogue/CEDAR_monocyte_CD14:eQTLcatalogue/CEDAR_T-cell_CD4:eQTLcatalogue/Fairfax_2014_naive:eQTLcatalogue/GENCORD_ge_fibroblast:eQTLcatalogue/GEUVADIS_ge_LCL:eQTLcatalogue/HipSci_ge_iPSC:eQTLcatalogue/TwinsUK_ge_LCL:PsychENCODE_eQTLs:DICE/NK:eQTLGen_cis_eQTLs:xQTLServer_eQTLs:CMC_SVA_cis:GTEx/v8/Adipose_Subcutaneous:GTEx/v8/Adipose_Visceral_Omentum:GTEx/v8/Wh…	-	Yes	Promoter_anchored_loops:Aorta:Left_Ventricle:Liver:Right_Ventricle:GM12878:IMR90:Mesenchymal_Stem_Cell:Mesendoderm:Trophoblast-like_Cell:hESC	5.31474e-16	rs7075195;rs9804238;rs3858122;rs10822123;rs7075195:rs9804238:rs3858122	138
ENSG00000177697	CD151	11	832843	839831	0.00164311	NA	0	0	15	3.6919e-13	0	eQTLGen_trans_eQTLs	-	No	NA	5.31474e-16	rs7075195	138
ENSG00000085733	CTTN	11	70244510	70282690	0.215777	NA	0	0	16	4.2002e-10	2.03832e-05	eQTLGen_trans_eQTLs	+	No	NA	5.31474e-16	rs7075195;rs4800452	138;216
ENSG00000149781	FERMT3	11	63974150	63991354	0.257005	-0.308938	0	0	2	5.0765e-06	0.0332473	eQTLGen_trans_eQTLs	-	No	NA	5.31474e-16	rs7075195	138
ENSG00000156689	GLYATL2	11	58601542	58671688	9.09625e-11	0.975784	0	0	5	3.6496e-06	0.0255579	eQTLGen_trans_eQTLs	+	No	NA	5.31474e-16	rs7075195	138
ENSG00000172927	MYEOV	11	69061605	69182494	0.00119291	4.04779	0	0	15	1.4505e-21	0	eQTLGen_trans_eQTLs	+	No	NA	5.31474e-16	rs7075195	138
ENSG00000154146	NRGN	11	124609742	124617106	0.536942	-0.467861	0	0	15	5.1205e-29	0	eQTLGen_trans_eQTLs	-	No	NA	5.31474e-16	rs7075195	138
ENSG00000019102	VSIG2	11	124617368	124622134	0.000163566	-0.399229	0	0	15	2.0098e-12	0	eQTLGen_trans_eQTLs	-	No	NA	5.31474e-16	rs7075195	138
ENSG00000177119	ANO6	12	45609770	45834187	4.52445e-20	0.260722	0	0	15	3.1646e-13	0	eQTLGen_trans_eQTLs	-	No	NA	5.31474e-16	rs7075195	138
ENSG00000111328	CDK2AP1	12	123745528	123756881	0.742361	NA	0	0	66	3.4405e-08	0.000146078	eQTLGen_cis_eQTLs:eQTLGen_trans_eQTLs	+	Yes	GM12878:IMR90:Mesenchymal_Stem_Cell	5.31474e-16	rs10734924;rs7075195;rs12824567:rs10734924	138;166;167
ENSG00000165682	CLEC1B	12	10138241	10166023	0.000104171	0.402766	0	0	15	1.2631e-11	0	eQTLGen_trans_eQTLs	-	No	NA	5.31474e-16	rs7075195	138
ENSG00000011105	TSPAN9	12	3186521	3395730	0.779778	1.65356	0	0	16	7.7847e-23	0	eQTLGen_trans_eQTLs	-	No	NA	5.31474e-16	rs7075195;rs4800452	138;216
ENSG00000110799	VWF	12	6058040	6233936	1.52411e-11	-0.3747	0	0	18	6.9007e-20	0	eQTLGen_trans_eQTLs	-	No	NA	5.31474e-16	rs7075195;rs4800452	138;216
ENSG00000102804	TSC22D1	13	45007655	45151283	0.941152	-0.0783322	0	0	15	9.7207e-25	0	eQTLGen_trans_eQTLs	+	No	NA	5.31474e-16	rs7075195	138
ENSG00000132970	WASF3	13	27131840	27263085	0.960588	0.379397	0	0	15	1.0373e-14	0	eQTLGen_trans_eQTLs	-	No	NA	5.31474e-16	rs7075195	138
ENSG00000166091	CMTM5	14	23846017	23848981	0.0600876	-0.0293343	0	0	18	6.6806e-14	0	eQTLGen_trans_eQTLs	-	No	NA	5.31474e-16	rs7075195;rs4800452	138;216
ENSG00000156206	C15orf26	15	81299374	81441516	0.835174	0.342015	0	0	15	6.8838e-24	0	eQTLGen_trans_eQTLs	-	No	NA	5.31474e-16	rs7075195	138
ENSG00000175746	C15orf54	15	39542885	39547046	0.000115196	1.74172	0	0	5	1.4779e-06	0.0115595	eQTLGen_trans_eQTLs	+	No	NA	5.31474e-16	rs7075195	138
ENSG00000103942	HOMER2	15	83509838	83654661	0.0545469	NA	0	0	24	3.2835e-07	0.00298307	eQTLcatalogue/Fairfax_2014_LPS2:eQTLGen_trans_eQTLs	-	Yes	Mesenchymal_Stem_Cell	5.31474e-16	rs6603004;rs7075195;rs715724:rs2062316	138;189;190
ENSG00000166963	MAP1A	15	43803156	43823818	0.999689	-0.820834	0	0	14	1.1517e-07	0.0012747	eQTLGen_trans_eQTLs	-	No	NA	5.31474e-16	rs7075195	138
ENSG00000166831	RBPMS2	15	65032091	65067786	0.323535	NA	0	0	15	3.0915e-32	0	eQTLGen_trans_eQTLs	-	No	NA	5.31474e-16	rs7075195	138
ENSG00000108387	SEPT4	17	56597611	56618179	0.0118369	-0.315891	0	0	15	2.0033e-17	0	eQTLGen_trans_eQTLs	-	No	NA	5.31474e-16	rs7075195	138
ENSG00000108846	ABCC3	17	48712138	48769613	2.61613e-14	-0.373436	0	0	15	4.8202e-17	0	eQTLGen_trans_eQTLs	-	No	NA	5.31474e-16	rs7075195	138
ENSG00000109089	CDR2L	17	72983727	73001895	0.00132718	0.499626	0	0	15	2.2678e-16	0	eQTLGen_trans_eQTLs	-	No	NA	5.31474e-16	rs7075195	138
ENSG00000005961	ITGA2B	17	42449548	42466873	4.07385e-05	-0.272815	0	0	15	1.3326e-52	0	eQTLGen_trans_eQTLs	-	No	NA	5.31474e-16	rs7075195	138
ENSG00000259207	ITGB3	17	45331212	45421658	0.1417	-0.214709	0	0	19	1.6222e-28	0	eQTLGen_trans_eQTLs:GTEx/v8/Esophagus_Muscularis	-	No	NA	5.31474e-16	rs7075195;rs4800452;rs208015	138;212;216
ENSG00000205309	NT5M	17	17206649	17250977	3.30165e-05	-0.102945	0	0	14	3.5437e-11	0	eQTLGen_trans_eQTLs	-	No	NA	5.31474e-16	rs7075195	138
ENSG00000132383	RPA1	17	1732996	1803376	0.308711	1.96191	0	0	31	9.0272e-30	0	eQTLGen_cis_eQTLs:eQTLGen_trans_eQTLs:GTEx/v8/Artery_Tibial	+	No	NA	5.31474e-16	rs4790292;rs3923783;rs7075195	138;207
ENSG00000167100	SAMD14	17	48187404	48207246	0.0202644	NA	0	0	15	5.8231e-14	0	eQTLGen_trans_eQTLs	-	No	NA	5.31474e-16	rs7075195	138
ENSG00000204323	SMIM5	17	73629514	73637484	NA	-0.871189	0	0	15	9.0003e-10	3.90396e-05	eQTLGen_trans_eQTLs	+	No	NA	5.31474e-16	rs7075195	138
ENSG00000124302	CHST8	19	34112861	34264414	0.00422202	-1.38273	0	0	13	1.3756e-08	0.000189964	eQTLGen_trans_eQTLs	-	No	NA	5.31474e-16	rs7075195	138
ENSG00000054793	ATP9A	20	50213053	50385173	0.999981	-0.515015	0	0	5	2.0161e-06	0.015533	eQTLGen_trans_eQTLs	+	No	NA	5.31474e-16	rs7075195	138
ENSG00000101447	FAM83D	20	37554955	37581703	2.5768e-05	0.373217	0	0	5	2.0809e-06	0.015991	eQTLGen_trans_eQTLs	+	No	NA	5.31474e-16	rs7075195	138
ENSG00000101335	MYL9	20	35169887	35178228	0.0660421	NA	0	0	15	1.1379e-39	0	eQTLGen_trans_eQTLs	-	No	NA	5.31474e-16	rs7075195	138
ENSG00000132819	RBM38	20	55966463	55984389	0.859283	-0.0950351	0	0	4	3.8411e-06	0.0266548	eQTLGen_trans_eQTLs	+	No	NA	5.31474e-16	rs7075195	138
ENSG00000185052	SLC24A3	20	19193290	19703581	0.959518	0.79591	0	0	14	8.7881e-09	0.000148392	eQTLGen_trans_eQTLs	-	No	NA	5.31474e-16	rs7075195	138
ENSG00000088826	SMOX	20	4101627	4168394	0.837564	NA	0	0	24	1.058e-09	3.94089e-05	eQTLGen_trans_eQTLs	+	No	NA	5.31474e-16	rs7075195;rs102275	138;151
ENSG00000184702	SEPT5	22	19701987	19712295	0.914632	NA	0	0	15	3.6904e-27	0	eQTLGen_trans_eQTLs	-	No	NA	5.31474e-16	rs7075195	138
ENSG00000128311	TST	22	37406900	37415681	0.000731843	NA	0	0	15	3.5782e-10	2.09074e-05	eQTLGen_trans_eQTLs	+	No	NA	5.31474e-16	rs7075195	138
ENSG00000183785	TUBA8	22	18593097	18629321	0.0032275	NA	0	0	5	4.365e-06	0.0294305	eQTLGen_trans_eQTLs	-	No	NA	5.31474e-16	rs7075195	138
ENSG00000163026	C2orf44	2	24252210	24272445	0.00144135	-0.476207	0	0	0	NA	NA	NA	NA	Yes	Adult_Cortex:Fetal_Cortex	5.53052e-16	rs11676272:rs11676272;rs7576788:rs6545812	28
ENSG00000119782	FKBP1B	2	24272571	24286551	0.00888533	NA	0	0	0	NA	NA	NA	NA	Yes	Adult_Cortex:Fetal_Cortex	5.53052e-16	rs11676272:rs11676272;rs7576788:rs6545812	28
ENSG00000121310	ECHDC2	1	53361656	53392884	1.18082e-07	0.192219	0	0	1	7.634e-06	0.0466232	eQTLGen_trans_eQTLs	+	No	NA	5.53754e-16	rs7212293	214
ENSG00000128656	CHN1	2	175664091	175870097	0.837424	NA	0	0	1	3.6993e-06	0.0258082	eQTLGen_trans_eQTLs	-	No	NA	5.53754e-16	rs7212293	214
ENSG00000102796	DHRS12	13	52342129	52378293	0.00725776	-0.134211	0	0	1	3.974e-07	0.00349436	eQTLGen_trans_eQTLs	-	No	NA	5.53754e-16	rs7212293	214
ENSG00000154262	ABCA6	17	67074843	67138029	1.83136e-16	0.0488739	0	0	0	NA	NA	NA	NA	Yes	Mesenchymal_Stem_Cell	5.53754e-16	rs7212293:rs7212293;rs8079078	214
ENSG00000141338	ABCA8	17	66863433	66951533	1.71937e-33	-0.722805	0	0	0	NA	NA	NA	NA	Yes	Left_Ventricle:Mesenchymal_Stem_Cell	5.53754e-16	rs7212293	214
ENSG00000100281	HMGXB4	22	35653445	35691800	0.218813	-0.309086	0	0	1	1.9973e-14	0	eQTLGen_trans_eQTLs	+	No	NA	5.53754e-16	rs7212293	214
ENSG00000237452	AC074212.3	19	46236509	46267792	0.376321	NA	0	0	0	NA	NA	NA	NA	Yes	Fetal_Cortex:Left_Ventricle:IMR90:Mesenchymal_Stem_Cell	5.83356e-16	rs10423928:rs3810291:rs177918:rs309193	227;228
ENSG00000105321	CCDC9	19	47759237	47775210	1.56832e-06	-0.331618	0	0	10	4.9028e-08	2.6643e-05	eQTLGen_cis_eQTLs:GTEx/v8/Esophagus_Muscularis	-	Yes	Adult_Cortex:Fetal_Cortex:IMR90:Mesenchymal_Stem_Cell	5.83356e-16	rs309193;rs3810291:rs177918:rs309193	228
ENSG00000177051	FBXO46	19	46213887	46234162	0.876437	0.0905437	0	0	7	9.452e-10	1.31397e-05	eQTLGen_cis_eQTLs:BIOSQTL/BIOS_eQTL_geneLevel	-	Yes	Fetal_Cortex:Left_Ventricle:IMR90:Mesenchymal_Stem_Cell	5.83356e-16	rs10423928;rs10423928:rs3810291:rs177918:rs309193	227;228
ENSG00000011478	QPCTL	19	46195741	46207247	0.00026154	-0.638079	3	2.74	8	5.67765e-08	0.000283883	eQTLcatalogue/HipSci_ge_iPSC	-	Yes	Adult_Cortex:Fetal_Cortex:IMR90:Mesenchymal_Stem_Cell	5.83356e-16	rs10423928;rs10423928:rs3810291:rs177918	227;228
ENSG00000125743	SNRPD2	19	46190712	46195827	0.747515	-0.475801	7	25.5	9	6.7998e-12	0	eQTLGen_cis_eQTLs:GTEx/v8/Cells_Cultured_fibroblasts:GTEx/v8/Skin_Sun_Exposed_Lower_leg	-	Yes	Adult_Cortex:Fetal_Cortex:IMR90:Mesenchymal_Stem_Cell	5.83356e-16	rs10423928;rs10423928:rs3810291:rs177918	227;228
ENSG00000106665	CLIP2	7	73703805	73820273	0.999882	0.252234	0	0	0	NA	NA	NA	NA	Yes	Adult_Cortex	6.22309e-16	rs7811265:rs13244268	110
ENSG00000106683	LIMK1	7	73497263	73536855	0.990896	-0.781218	0	0	1	1.0795e-05	0.030325	eQTLGen_cis_eQTLs	-	Yes	Adult_Cortex:Fetal_Cortex	6.22309e-16	rs13230514;rs13244268:rs7811265	110
ENSG00000049541	RFC2	7	73645829	73668774	4.04213e-05	-0.396976	0	0	0	NA	NA	NA	NA	Yes	Adult_Cortex:Fetal_Cortex	6.22309e-16	rs7811265:rs13244268	110
ENSG00000154265	ABCA5	17	67240452	67323385	2.52772e-15	-0.393171	0	0	0	NA	NA	NA	NA	Yes	Mesenchymal_Stem_Cell	6.41775e-16	rs7212293	214
ENSG00000196704	AMZ2	17	66243715	66253297	1.54653e-08	NA	0	0	3	4.8425e-08	0.000189873	DICE/T_CD4_TFH:eQTLGen_cis_eQTLs	+	Yes	Left_Ventricle:GM12878:IMR90:Mesenchymal_Stem_Cell:Mesendoderm:hESC	6.41775e-16	rs7212293;rs8079078	214
ENSG00000108878	CACNG1	17	65040706	65052909	4.77505e-07	0.123871	0	0	0	NA	NA	NA	NA	Yes	hESC	6.41775e-16	rs7212293	214
ENSG00000108932	SLC16A6	17	66263167	66287408	0.205129	0.544954	0	0	0	NA	NA	NA	NA	Yes	Mesenchymal_Stem_Cell	6.41775e-16	rs7212293	214
ENSG00000196866	HIST1H2AD	6	26199079	26199471	3.99677e-05	0.287759	10	21.1	3	3.96002e-05	0.023844	BIOSQTL/BIOS_eQTL_geneLevel	-	Yes	Adult_Cortex:Fetal_Cortex:Left_Ventricle:Liver:GM12878:IMR90:Mesenchymal_Stem_Cell:Neural_Progenitor_Cell:Trophoblast-like_Cell:hESC	6.94381e-16	rs4145878;rs6916289;rs806794;rs1009181;rs707896:rs2066295:rs6916289:rs806794:rs2893843:rs1009181:rs9379831	88
ENSG00000197409	HIST1H3D	6	26197068	26199521	0.0111951	NA	11	21.1	16	1.5431e-09	1.30779e-05	PsychENCODE_eQTLs:eQTLGen_cis_eQTLs:BIOSQTL/BIOS_eQTL_geneLevel	-	Yes	Adult_Cortex:Fetal_Cortex:Left_Ventricle:Liver:GM12878:IMR90:Mesenchymal_Stem_Cell:Neural_Progenitor_Cell:Trophoblast-like_Cell:hESC	6.94381e-16	rs4145878;rs6916289;rs806794;rs1009181;rs2893843;rs707896:rs2066295:rs6916289:rs806794:rs2893843:rs1009181:rs9379831	88
ENSG00000105507	CABP5	19	48533210	48547310	0.0042208	1.44858	0	0	2	8.8717e-09	0.00016469	eQTLGen_trans_eQTLs	+	No	NA	6.94381e-16	rs806794	88
ENSG00000119801	YPEL5	2	30369807	30383399	0.799401	0.0497779	0	0	6	9.9109e-07	0.00810759	eQTLGen_trans_eQTLs	+	No	NA	1.07858e-15	rs7075195	138
ENSG00000164331	ANKRA2	5	72848160	72861511	0.00350504	0.591154	0	0	0	NA	NA	NA	NA	Yes	Left_Ventricle:Trophoblast-like_Cell:hESC	1.22194e-15	rs17649350:rs2303647:rs7700719:rs13356670;rs6453133	78
ENSG00000214944	ARHGEF28	5	72921983	73237818	1.82695e-10	0.0745389	0	0	0	NA	NA	NA	NA	Yes	Left_Ventricle:Mesenchymal_Stem_Cell:Mesendoderm:Trophoblast-like_Cell	1.22194e-15	rs13356670;rs6453133:rs7700719	78
ENSG00000164251	F2RL1	5	76114758	76131140	0.00202252	-0.779082	0	0	0	NA	NA	NA	NA	Yes	Left_Ventricle:Mesenchymal_Stem_Cell	1.22194e-15	rs9942407:rs13356670;rs6453133	78
ENSG00000164338	UTP15	5	72861268	72877794	0.985836	1.05743	0	0	0	NA	NA	NA	NA	Yes	Left_Ventricle:Trophoblast-like_Cell:hESC	1.22194e-15	rs17649350:rs2303647:rs7700719:rs13356670;rs6453133	78
ENSG00000168748	CA7	16	66878282	66888056	0.775376	0.289238	0	0	0	NA	NA	NA	NA	Yes	IMR90	1.25602e-15	rs7196917:rs6499240:rs11866219;rs7196917	202
ENSG00000260537	RP11-529K1.3	16	70333097	70400163	NA	NA	0	0	0	NA	NA	NA	NA	Yes	Adult_Cortex:Fetal_Cortex:Left_Ventricle	1.36017e-15	rs7200764:rs7196917:rs6499240	202
ENSG00000189091	SF3B3	16	70557691	70608820	0.999963	-0.692592	0	0	73	1.6284e-15	0	eQTLcatalogue/Lepik_2017_ge_blood:eQTLGen_cis_eQTLs:GTEx/v8/Esophagus_Mucosa	+	Yes	Adult_Cortex:Fetal_Cortex	1.36017e-15	rs7196917;rs7200764;rs6499240;rs2270842;rs7200764:rs7196917:rs6499240	202
ENSG00000157429	ZNF19	16	71498453	71598992	1.78277e-05	-0.369655	0	0	0	NA	NA	NA	NA	Yes	Fetal_Cortex	1.36017e-15	rs7200764:rs7196917:rs6499240	202
ENSG00000112763	BTN2A1	6	26458150	26476849	1.07468e-18	0.260571	0	0	127	6.7781e-28	0	eQTLcatalogue/Lepik_2017_ge_blood:PsychENCODE_eQTLs:eQTLGen_cis_eQTLs:BIOSQTL/BIOS_eQTL_geneLevel	+	Yes	Liver:GM12878:IMR90:Mesenchymal_Stem_Cell:Mesendoderm:Trophoblast-like_Cell:hESC	1.46985e-15	rs707896;rs2066295;rs2893843;rs1009181;rs4145878;rs6916289;rs806794;rs6916289:rs806794:rs2893843	88
ENSG00000010704	HFE	6	26087509	26098571	8.49697e-07	0.210172	10	13.32	38	2.18796e-09	3.26102e-15	BIOSQTL/BIOS_eQTL_geneLevel:GTEx/v8/Artery_Tibial:GTEx/v8/Nerve_Tibial	-	Yes	GM12878:IMR90:Neural_Progenitor_Cell	1.46985e-15	rs707896;rs806794;rs2066295:rs1009181:rs9379831:rs806794:rs6916289:rs2893843	88
ENSG00000124575	HIST1H1D	6	26234440	26235216	NA	0.136123	5	4.068	17	3.7479e-08	6.3947e-06	PsychENCODE_eQTLs:DICE/T_CD4_memory_TREG:CMC_SVA_cis	-	Yes	Adult_Cortex:Fetal_Cortex:Left_Ventricle:Liver:GM12878:IMR90:Mesenchymal_Stem_Cell:Neural_Progenitor_Cell:Trophoblast-like_Cell:hESC	1.46985e-15	rs806794;rs4145878;rs6916289;rs2893843;rs9379831;rs806794:rs6916289:rs707896:rs2066295:rs2893843:rs1009181:rs9379831	88
ENSG00000198327	HIST1H4F	6	26240561	26240976	0.181985	1.06312	3	4.068	71	1.87741e-18	9.25535e-16	PsychENCODE_eQTLs:CMC_SVA_cis:CMC_NoSVA_cis:BRAINEAC/OCTX	-	Yes	Adult_Cortex:Fetal_Cortex:Aorta:Left_Ventricle:Liver:GM12878:IMR90:Mesenchymal_Stem_Cell:Neural_Progenitor_Cell:Trophoblast-like_Cell:hESC	1.46985e-15	rs806794;rs2893843;rs2066295;rs4145878;rs6916289;rs1009181;rs9379831;rs6916289:rs707896:rs2066295:rs2893843:rs806794:rs1009181:rs9379831	88
ENSG00000112812	PRSS16	6	27215480	27224403	2.23792e-06	0.00884812	0	0	65	2.7679e-09	3.974e-11	eQTLGen_cis_eQTLs:GTEx/v8/Brain_Cerebellum:GTEx/v8/Esophagus_Muscularis:GTEx/v8/Thyroid	-	No	NA	1.46985e-15	rs806794;rs2893843;rs6916289	88
ENSG00000148180	GSN	9	123970072	124095121	3.18618e-06	NA	0	0	2	5.4935e-06	0.0356177	eQTLGen_trans_eQTLs	+	No	NA	1.64249e-15	rs7075195	138
ENSG00000134480	CCNH	5	86687311	86708836	0.00472976	-0.279835	0	0	42	6.35708e-06	0.00295631	eQTLcatalogue/GENCORD_ge_LCL:GTEx/v8/Esophagus_Gastroesophageal_Junction	-	Yes	Hippocampus:IMR90:Mesenchymal_Stem_Cell:Mesendoderm:Neural_Progenitor_Cell:Trophoblast-like_Cell:hESC	1.65814e-15	rs2178270;rs6870983;rs3814424;rs2161228:rs323781:rs6870983:rs16903228:rs992623:rs3814424:rs2178270	79
ENSG00000153140	CETN3	5	89688078	89705603	0.0113208	-0.797954	0	0	0	NA	NA	NA	NA	Yes	Adult_Cortex:Fetal_Cortex:Aorta:Hippocampus:Left_Ventricle:Liver:GM12878:IMR90:Mesenchymal_Stem_Cell:Mesendoderm:Neural_Progenitor_Cell:Trophoblast-like_Cell:hESC	1.65814e-15	rs3814424;rs2161228:rs323781:rs2178270:rs16903228:rs992623:rs6870983:rs3814424	79
ENSG00000164180	TMEM161B	5	87485450	87565293	0.003685	0.0123156	27	16.58	175	2.90593e-12	0	BIOSQTL/BIOS_eQTL_geneLevel:CMC_SVA_cis:GTEx/v8/Artery_Tibial:GTEx/v8/Colon_Sigmoid:GTEx/v8/Muscle_Skeletal	+	Yes	Adult_Cortex:Fetal_Cortex:Aorta:Left_Ventricle:Liver:GM12878:IMR90:Mesenchymal_Stem_Cell:Mesendoderm:Neural_Progenitor_Cell:Trophoblast-like_Cell:hESC	1.65814e-15	rs6870983;rs992623;rs2178270;rs16903228;rs323781;rs3814424;rs2161228:rs323781:rs6870983:rs16903228:rs992623:rs3814424:rs2178270	79
ENSG00000181754	AMIGO1	1	110046797	110052360	0.888493	-0.212526	0	0	16	4.1675e-24	0	eQTLcatalogue/Lepik_2017_ge_blood:eQTLGen_cis_eQTLs:GTEx/v8/Lung:GTEx/v8/Skin_Not_Sun_Exposed_Suprapubic	+	Yes	IMR90:Mesenchymal_Stem_Cell	1.95859e-15	rs17024393	19
ENSG00000116337	AMPD2	1	110158726	110174673	0.0085425	-0.430988	4	6.551	0	NA	NA	NA	NA	No	NA	1.95859e-15	rs17024393	19
ENSG00000143126	CELSR2	1	109792641	109818372	0.999999	0.807304	0	0	11	1.96872e-06	1.2613e-66	eQTLGen_cis_eQTLs:GTEx/v8/Muscle_Skeletal	-	Yes	Adult_Cortex:Spleen:IMR90:Mesenchymal_Stem_Cell	1.95859e-15	rs17024393	19
ENSG00000134183	GNAT2	1	110145889	110155679	0.00815865	-0.0928283	3	10.04	0	NA	NA	NA	NA	No	NA	1.95859e-15	rs17024393	19
ENSG00000156097	GPR61	1	110082494	110091028	0.801489	-0.58687	4	16.07	15	5.19638e-10	1.74105e-06	GTEx/v8/Thyroid	-	No	NA	1.95859e-15	rs17024393	19
ENSG00000134184	GSTM1	1	110230436	110251661	0.345714	NA	2	0.887	18	3.27170000000001e-310	0	eQTLcatalogue/CEDAR_T-cell_CD4:eQTLcatalogue/CEDAR_T-cell_CD8:eQTLcatalogue/Fairfax_2014_naive:eQTLcatalogue/GEUVADIS_ge_LCL:eQTLcatalogue/Kasela_2017_T-cell_CD4:eQTLcatalogue/Kasela_2017_T-cell_CD8:eQTLcatalogue/Lepik_2017_ge_blood:PsychENCODE_eQTLs:eQTLGen_cis_eQTLs:GTEx/v8/Adipose_Subcutaneous:GTEx/v8/Adipose_Visceral_Omentum:GTEx/v8/Whole_Blood:GTEx/v8/Artery_Aorta:GTEx/v8/Artery_Tibial:GTEx/…	+	Yes	Promoter_anchored_loops	1.95859e-15	rs17024393	19
ENSG00000213366	GSTM2	1	110210644	110252171	0.008902	-0.190008	3	0.887	16	3.8303e-199	0	eQTLcatalogue/GEUVADIS_ge_LCL:eQTLcatalogue/Lepik_2017_ge_blood:eQTLGen_cis_eQTLs:GTEx/v8/Whole_Blood:GTEx/v8/Artery_Tibial:GTEx/v8/Muscle_Skeletal:GTEx/v8/Cells_Cultured_fibroblasts	+	No	NA	1.95859e-15	rs17024393	19
ENSG00000134202	GSTM3	1	110276554	110284384	0.000572589	0.168105	0	0	16	1.1254e-101	0	PsychENCODE_eQTLs:eQTLGen_cis_eQTLs:GTEx/v8/Adipose_Subcutaneous:GTEx/v8/Whole_Blood:GTEx/v8/Artery_Tibial:GTEx/v8/Brain_Cortex:GTEx/v8/Brain_Frontal_Cortex_BA9:GTEx/v8/Brain_Hippocampus:GTEx/v8/Brain_Nucleus_accumbens_basal_ganglia:GTEx/v8/Esophagus_Mucosa:GTEx/v8/Lung:GTEx/v8/Nerve_Tibial:GTEx/v8/Pituitary:GTEx/v8/Cells_Cultured_fibroblasts:GTEx/v8/Skin_Not_Sun_Exposed_Suprapubic:GTEx/v8/Skin_S…	+	No	NA	1.95859e-15	rs17024393	19
ENSG00000168765	GSTM4	1	110198703	110208118	0.000917345	0.373952	3	5.769	18	3.5396e-123	0	eQTLcatalogue/CEDAR_T-cell_CD4:eQTLcatalogue/CEDAR_T-cell_CD8:eQTLcatalogue/Fairfax_2014_naive:eQTLcatalogue/GEUVADIS_ge_LCL:eQTLcatalogue/Kasela_2017_T-cell_CD4:eQTLcatalogue/Kasela_2017_T-cell_CD8:eQTLcatalogue/Lepik_2017_ge_blood:PsychENCODE_eQTLs:eQTLGen_cis_eQTLs:GTEx/v8/Adipose_Subcutaneous:GTEx/v8/Whole_Blood:GTEx/v8/Artery_Aorta:GTEx/v8/Artery_Tibial:GTEx/v8/Esophagus_Mucosa:GTEx/v8/Muscl…	+	Yes	Promoter_anchored_loops:Adult_Cortex:Fetal_Cortex:IMR90:Mesenchymal_Stem_Cell:Mesendoderm:hESC	1.95859e-15	rs17024393	19
ENSG00000116299	KIAA1324	1	109656301	109749401	2.14865e-08	NA	0	0	17	9.8816e-17	0	eQTLcatalogue/Lepik_2017_ge_blood:eQTLGen_cis_eQTLs:eQTLGen_trans_eQTLs	-	Yes	Adult_Cortex:IMR90	1.95859e-15	rs17024393;rs3800227	19;97
ENSG00000134222	PSRC1	1	109822178	109825808	1.74718e-06	-0.20888	0	0	16	3.3138e-36	0	eQTLcatalogue/Lepik_2017_ge_blood:eQTLGen_cis_eQTLs:GTEx/v8/Nerve_Tibial:GTEx/v8/Thyroid	+	No	NA	1.95859e-15	rs17024393	19
ENSG00000134243	SORT1	1	109852192	109940573	0.999927	-1.34619	0	0	12	7.8766e-07	0.00252885	eQTLGen_cis_eQTLs	+	Yes	Adult_Cortex:Fetal_Cortex	1.95859e-15	rs17024393	19
ENSG00000090857	PDPR	16	70147529	70195203	4.85026e-08	2.68029	0	0	150	2.38742e-17	0	eQTLcatalogue/CEDAR_T-cell_CD8:eQTLGen_cis_eQTLs:BIOSQTL/BIOS_eQTL_geneLevel:GTEx/v8/Brain_Cerebellum:GTEx/v8/Stomach	-	Yes	Promoter_anchored_loops:Left_Ventricle:IMR90	2.21529e-15	rs2270842;rs904810;rs7200764;rs7200764:rs7196917:rs6499240:rs11866219;rs7196917	202
ENSG00000150347	ARID5B	10	63661059	63856703	0.99989	-1.13936	0	0	0	NA	NA	NA	NA	Yes	Adult_Cortex:Fetal_Cortex:Aorta:Left_Ventricle:Liver:GM12878:IMR90:Mesenchymal_Stem_Cell:Mesendoderm:Trophoblast-like_Cell:hESC	2.26852e-15	rs9804238:rs7075195:rs3858122:rs10822123	138
ENSG00000182010	RTKN2	10	63942794	64028466	1.30977e-14	2.54628	0	0	0	NA	NA	NA	NA	Yes	Adult_Cortex:Left_Ventricle:GM12878:IMR90:Mesenchymal_Stem_Cell:Mesendoderm:Trophoblast-like_Cell	2.26852e-15	rs9804238:rs7075195:rs10822123:rs3858122	138
ENSG00000140750	ARHGAP17	16	24930706	25026987	0.990466	-0.0199799	0	0	1	7.47323e-05	0.023623	GTEx/v8/Skin_Sun_Exposed_Lower_leg	NA	Yes	Left_Ventricle:Liver:GM12878:IMR90:Mesenchymal_Stem_Cell:Mesendoderm	2.62076e-15	rs189919;rs7186893:rs189919	196
ENSG00000185716	C16orf52	16	22018959	22098855	NA	-0.839598	0	0	0	NA	NA	NA	NA	Yes	IMR90	2.62076e-15	rs7186893:rs189919	196
ENSG00000006116	CACNG3	16	24266874	24374122	0.987801	-1.07669	0	0	0	NA	NA	NA	NA	Yes	Mesendoderm:Trophoblast-like_Cell:hESC	2.62076e-15	rs7186893:rs189919	196
ENSG00000166869	CHP2	16	23765948	23770272	0.00659126	-0.331842	0	0	0	NA	NA	NA	NA	Yes	Mesendoderm:hESC	2.62076e-15	rs7186893:rs189919	196
ENSG00000245888	CTD-3203P2.2	16	27279526	27301813	NA	NA	0	0	0	NA	NA	NA	NA	Yes	IMR90:Mesenchymal_Stem_Cell:Mesendoderm	2.62076e-15	rs7186893:rs189919	196
ENSG00000166847	DCTN5	16	23652713	23681195	0.0204374	0.0702276	0	0	0	NA	NA	NA	NA	Yes	IMR90:Mesenchymal_Stem_Cell:Mesendoderm:hESC	2.62076e-15	rs7186893:rs189919	196
ENSG00000103319	EEF2K	16	22217603	22298554	8.33829e-11	-0.731301	0	0	0	NA	NA	NA	NA	Yes	IMR90	2.62076e-15	rs7186893:rs189919	196
ENSG00000077235	GTF3C1	16	27470876	27561234	0.999996	-0.740966	0	0	0	NA	NA	NA	NA	Yes	IMR90:Mesenchymal_Stem_Cell:Mesendoderm:hESC	2.62076e-15	rs7186893:rs189919:rs9939450:rs9302428	196;197
ENSG00000103522	IL21R	16	27413483	27462115	0.846368	0.835963	0	0	0	NA	NA	NA	NA	Yes	Left_Ventricle:GM12878:IMR90:Mesenchymal_Stem_Cell:Mesendoderm:Trophoblast-like_Cell:hESC	2.62076e-15	rs7186893:rs189919:rs9302428	196
ENSG00000077238	IL4R	16	27324989	27376099	0.0317438	0.483669	0	0	0	NA	NA	NA	NA	Yes	IMR90	2.62076e-15	rs7186893:rs189919	196
ENSG00000047578	KIAA0556	16	27561454	27791690	1.30821e-17	-1.23016	0	0	0	NA	NA	NA	NA	Yes	IMR90:Mesenchymal_Stem_Cell:Mesendoderm:hESC	2.62076e-15	rs7186893:rs189919:rs9939450:rs9302428	196;197
ENSG00000205629	LCMT1	16	25123050	25189552	0.00155058	0.180531	0	0	0	NA	NA	NA	NA	Yes	Adult_Cortex:IMR90:Mesenchymal_Stem_Cell:Mesendoderm:Trophoblast-like_Cell	2.62076e-15	rs7186893:rs189919	196
ENSG00000004779	NDUFAB1	16	23592323	23607677	0.755255	0.2491	0	0	0	NA	NA	NA	NA	Yes	Left_Ventricle:IMR90:Mesenchymal_Stem_Cell:hESC	2.62076e-15	rs7186893:rs189919	196
ENSG00000169189	NSMCE1	16	27236312	27280115	0.0383884	-0.41829	0	0	0	NA	NA	NA	NA	Yes	IMR90:Mesenchymal_Stem_Cell:Mesendoderm	2.62076e-15	rs7186893:rs189919	196
ENSG00000083093	PALB2	16	23614488	23652631	1.32628e-10	-0.506599	0	0	0	NA	NA	NA	NA	Yes	IMR90:Mesenchymal_Stem_Cell:Mesendoderm:hESC	2.62076e-15	rs7186893:rs189919	196
ENSG00000122257	RBBP6	16	24549014	24584184	0.999999	-0.698528	0	0	0	NA	NA	NA	NA	Yes	Aorta:Left_Ventricle:Liver:Right_Ventricle:GM12878:IMR90:Mesenchymal_Stem_Cell:Mesendoderm:Neural_Progenitor_Cell:Trophoblast-like_Cell:hESC	2.62076e-15	rs7186893:rs189919:rs9302428	196
ENSG00000155592	ZKSCAN2	16	25247322	25269252	0.00293767	-0.193058	0	0	0	NA	NA	NA	NA	Yes	Adult_Cortex:Aorta:Left_Ventricle:Liver:IMR90:Mesenchymal_Stem_Cell:Mesendoderm:Trophoblast-like_Cell:hESC	2.62076e-15	rs7186893:rs189919:rs9302428	196
ENSG00000197170	PSMD12	17	65334032	65362743	0.997268	-1.24002	0	0	113	NA	0.009	CMC_SVA_cis:CMC_NoSVA_cis	-	No	NA	3.13613e-15	rs7212293;rs8079078	214
ENSG00000172554	SNTG2	2	946554	1371385	9.17609e-07	NA	0	0	5	2.5282e-07	9.32224e-32	DICE/T_CD4_naive_TREG:eQTLGen_cis_eQTLs:GTEx/v8/Nerve_Tibial	+	No	NA	4.2595e-15	rs4611674;rs1317005;rs12999373;rs12996547	26
ENSG00000065135	GNAI3	1	110091233	110136975	0.0388113	0.458884	6	16.07	0	NA	NA	NA	NA	Yes	IMR90:Mesenchymal_Stem_Cell:Mesendoderm:hESC	4.39768e-15	rs17024393	19
ENSG00000182674	KCNB2	8	73449626	73850584	0.954616	NA	57	14.68	54	1.07938e-17	5.01585e-13	PsychENCODE_eQTLs:GTEx/v8/Artery_Aorta:GTEx/v8/Artery_Tibial:GTEx/v8/Esophagus_Mucosa:GTEx/v8/Nerve_Tibial	-	Yes	Adult_Cortex:Fetal_Cortex:Left_Ventricle:Liver:Pancreas:Right_Ventricle:IMR90:Mesenchymal_Stem_Cell:Mesendoderm:Neural_Progenitor_Cell:Trophoblast-like_Cell:hESC	4.48189e-15	rs2017657;rs349367;rs1431659;rs1542709;rs6472696;rs2017657:rs1542709	126
ENSG00000270466	SEPT1	16	30389755	30393863	NA	NA	1	12.92	0	NA	NA	NA	NA	Yes	Adult_Cortex:Fetal_Cortex:Left_Ventricle:Liver:Right_Ventricle:GM12878:IMR90:Mesenchymal_Stem_Cell:Mesendoderm:Trophoblast-like_Cell:hESC	7.09011e-15	rs4238961;rs3814883:rs4787491:rs7186852:rs8063565:rs7184567;rs8063565;rs11150596:rs8063565;rs7186852:rs8047664:rs4787480:rs2005219:rs7184567;rs11150596	198
ENSG00000103485	QPRT	16	29674600	29710020	0.593366	-0.696242	0	0	8	9.06966e-05	0.00773447	PsychENCODE_eQTLs	+	Yes	Promoter_anchored_loops	7.09011e-15	rs4787491;rs2005219;rs3814883;rs2887799;rs3814883:rs4787491:rs2005219	198
ENSG00000161798	AQP5	12	50355653	50359464	0.00438548	NA	0	0	88	1.2769e-09	1.60466e-10	GTEx/v8/Lung:GTEx/v8/Thyroid	+	Yes	Promoter_anchored_loops:Adult_Cortex:Left_Ventricle:Liver:Spleen:GM12878:IMR90:Mesenchymal_Stem_Cell:Mesendoderm:Trophoblast-like_Cell:hESC	9.06931e-15	rs4898539;rs7973894;rs10875982;rs7132908;rs4898539:rs7132908:rs10875982:rs11836282:rs7973894	160
ENSG00000086159	AQP6	12	50360977	50370922	0.211428	-0.418669	0	0	0	NA	NA	NA	NA	Yes	EP_links_oneway:Promoter_anchored_loops:Fetal_Cortex:IMR90:Mesenchymal_Stem_Cell:Mesendoderm	9.06931e-15	rs7132908:rs4898539:rs11836282:rs7973894:rs10875982	160
ENSG00000134287	ARF3	12	49329506	49351334	0.622731	0.0507663	0	0	57	2.3061e-12	0	eQTLGen_cis_eQTLs	-	No	NA	9.06931e-15	rs11836282;rs10875982;rs7132908	160
ENSG00000110881	ASIC1	12	50451331	50477394	0.988325	-1.01808	0	0	0	NA	NA	NA	NA	Yes	EP_links_oneway:Promoter_anchored_loops:Adult_Cortex:Fetal_Cortex:Left_Ventricle:IMR90:Mesenchymal_Stem_Cell	9.06931e-15	rs7132908:rs4898539:rs11836282:rs10875982:rs7973894	160
ENSG00000186666	BCDIN3D	12	50231573	50236912	0.00503915	-0.475447	30	8.739	15	1.49865e-05	6.59708e-06	GTEx/v8/Cells_Cultured_fibroblasts:GTEx/v8/Thyroid	+	Yes	Promoter_anchored_loops:IMR90	9.06931e-15	rs7973894;rs4898539;rs10875982;rs7132908;rs11836282:rs10875982:rs4898539:rs7132908	160
ENSG00000186897	C1QL4	12	49726200	49730971	0.621177	-0.456915	0	0	60	3.29267e-07	8.1105e-79	GTEx/v8/Prostate:GTEx/v8/Thyroid	+	No	NA	9.06931e-15	rs7132908;rs11836282;rs7973894;rs10875982;rs4898539	160
ENSG00000135472	FAIM2	12	50260679	50298000	0.619353	-0.290991	77	19.54	110	5.7783e-16	4.49817e-53	eQTLcatalogue/GENCORD_ge_fibroblast:CMC_SVA_cis:GTEx/v8/Brain_Frontal_Cortex_BA9:GTEx/v8/Cells_Cultured_fibroblasts:GTEx/v8/Testis	-	Yes	Promoter_anchored_loops:IMR90	9.06931e-15	rs4898539;rs7132908;rs10875982;rs11836282;rs4898539:rs7132908:rs11836282:rs7973894:rs10875982	160
ENSG00000161791	FMNL3	12	50031724	50101948	0.3565	-0.73003	0	0	43	3.6496e-06	0.00267016	BIOSQTL/BIOS_eQTL_geneLevel:GTEx/v8/Artery_Coronary	-	Yes	Adult_Cortex:Fetal_Cortex:IMR90	9.06931e-15	rs11836282;rs7132908;rs10875982;rs11836282:rs10875982:rs7132908:rs4898539:rs7973894	160
ENSG00000167566	NCKAP5L	12	50184929	50222533	0.565619	-0.528308	60	16.57	91	4.5484e-12	0	eQTLcatalogue/TwinsUK_ge_LCL:eQTLGen_cis_eQTLs:CMC_SVA_cis:GTEx/v8/Pancreas:GTEx/v8/Thyroid	-	Yes	Adult_Cortex:Fetal_Cortex:IMR90	9.06931e-15	rs11836282;rs7973894;rs4898539;rs10875982;rs7132908;rs11836282:rs10875982:rs7132908:rs4898539	160
ENSG00000110844	PRPF40B	12	49962001	50038449	0.988653	NA	0	0	43	3.6496e-06	0.00267016	BIOSQTL/BIOS_eQTL_geneLevel	-	No	NA	9.06931e-15	rs11836282;rs7132908;rs10875982	160
ENSG00000161800	RACGAP1	12	50370706	50426919	0.786373	-0.813219	0	0	0	NA	NA	NA	NA	Yes	IMR90:Mesenchymal_Stem_Cell	9.06931e-15	rs11836282:rs7973894:rs10875982:rs4898539:rs7132908	160
ENSG00000066117	SMARCD1	12	50478755	50494495	0.999527	-1.11197	0	0	25	8.72925e-05	0.00748064	PsychENCODE_eQTLs	+	Yes	Left_Ventricle:IMR90:Mesenchymal_Stem_Cell	9.06931e-15	rs7973894;rs4898539;rs10875982;rs10875982:rs4898539:rs7132908:rs11836282:rs7973894	160
ENSG00000158315	RHBDL2	1	39351479	39407471	2.70128e-06	0.690584	0	0	15	4.33929e-05	0.0370909	GTEx/v8/Artery_Tibial	-	Yes	Mesenchymal_Stem_Cell	9.60541e-15	rs4660208;rs4660808;rs11206430	7
ENSG00000169908	TM4SF1	3	149086809	149095652	0.00085911	-0.218138	0	0	7	9.5837e-07	0.00784562	eQTLGen_trans_eQTLs	+	No	NA	1.06956e-14	rs7075195	138
ENSG00000113645	WWC1	5	167718656	167899308	0.0183845	NA	0	0	7	7.429e-07	0.00633014	eQTLGen_trans_eQTLs	+	No	NA	1.06956e-14	rs7075195	138
ENSG00000024862	CCDC28A	6	139094657	139114456	1.49778e-05	-0.12694	0	0	5	1.2945e-06	0.010286	eQTLGen_trans_eQTLs	-	No	NA	1.06956e-14	rs7075195	138
ENSG00000158457	TSPAN33	7	128784712	128808671	0.000103178	0.982621	0	0	6	3.5832e-06	0.0252436	eQTLGen_trans_eQTLs	-	No	NA	1.06956e-14	rs7075195	138
ENSG00000141854	hsa-mir-1199	19	14183348	14185874	NA	NA	0	0	7	8.5752e-07	0.00721344	eQTLGen_trans_eQTLs	+	No	NA	1.06956e-14	rs7075195	138
ENSG00000184792	OSBP2	22	31089769	31303811	0.0361487	0.0654215	0	0	7	5.8229e-07	0.00511025	eQTLGen_trans_eQTLs	-	No	NA	1.06956e-14	rs7075195	138
ENSG00000196353	CPNE4	3	131252399	132004254	0.775139	-1.1262	364	15.89	322	3.3262e-25	0	eQTLcatalogue/HipSci_ge_iPSC:PsychENCODE_eQTLs:eQTLGen_cis_eQTLs:BIOSQTL/BIOS_eQTL_geneLevel:CMC_SVA_cis:CMC_NoSVA_cis:GTEx/v8/Adipose_Subcutaneous:GTEx/v8/Artery_Aorta:GTEx/v8/Artery_Coronary:GTEx/v8/Artery_Tibial:GTEx/v8/Esophagus_Muscularis:GTEx/v8/Heart_Atrial_Appendage:GTEx/v8/Heart_Left_Ventricle:GTEx/v8/Pituitary:GTEx/v8/Cells_Cultured_fibroblasts:GTEx/v8/Skin_Sun_Exposed_Lower_leg:GTEx/v8…	+	No	NA	1.11546e-14	rs3749262;rs9876897;rs11918334;rs747501;rs1398766;rs876424;rs16838395;rs1320903	61
ENSG00000141448	GATA6	18	19749404	19782491	NA	-1.28443	0	0	0	NA	NA	NA	NA	Yes	IMR90	1.32925e-14	rs11663645;rs11662237;rs11082402:rs11662237:rs11663645	216
ENSG00000067900	ROCK1	18	18526867	18691812	0.999997	-0.720276	0	0	0	NA	NA	NA	NA	Yes	Left_Ventricle	1.32925e-14	rs11663645;rs11662237;rs11082402:rs11662237:rs11663645	216
ENSG00000102931	ARL2BP	16	57279010	57287516	0.000774156	-0.164113	0	0	0	NA	NA	NA	NA	Yes	Left_Ventricle:Liver:GM12878:IMR90:Mesenchymal_Stem_Cell:Mesendoderm:Trophoblast-like_Cell	1.33096e-14	rs2895432:rs12596776:rs1366544:rs4783962:rs6499861:rs12446275	200
ENSG00000125124	BBS2	16	56500748	56554195	1.85254e-10	0.988169	0	0	56	5.7357e-20	0	eQTLGen_cis_eQTLs	-	Yes	IMR90:Mesenchymal_Stem_Cell	1.33096e-14	rs2895432;rs12596776	200
ENSG00000140848	CPNE2	16	57126449	57181878	0.544003	NA	0	0	0	NA	NA	NA	NA	Yes	Adult_Cortex:GM12878:IMR90:Mesenchymal_Stem_Cell	1.33096e-14	rs4783962:rs6499861:rs1366544:rs2895432:rs12596776	200
ENSG00000006210	CX3CL1	16	57406370	57418960	0.963378	0.273053	0	0	0	NA	NA	NA	NA	Yes	Left_Ventricle:IMR90:Mesenchymal_Stem_Cell	1.33096e-14	rs2895432:rs12596776	200
ENSG00000087250	MT3	16	56622986	56625000	0.254133	NA	0	0	0	NA	NA	NA	NA	Yes	Left_Ventricle:IMR90:Mesenchymal_Stem_Cell:Mesendoderm:Trophoblast-like_Cell:hESC	1.33096e-14	rs2895432:rs12596776:rs1366544:rs4783962:rs6499861:rs12446275	200
ENSG00000181915	ADO	10	64564516	64568238	0.745073	-0.496919	0	0	0	NA	NA	NA	NA	Yes	Adult_Cortex:Left_Ventricle:IMR90:Mesendoderm	1.49245e-14	rs9804238:rs7075195:rs10822123	138
ENSG00000183346	C10orf107	10	63422719	63526524	0.00079093	-0.76989	0	0	0	NA	NA	NA	NA	Yes	Fetal_Cortex:Mesenchymal_Stem_Cell	1.49245e-14	rs9804238:rs7075195	138
ENSG00000170312	CDK1	10	62538089	62554610	0.970572	-0.363031	0	0	0	NA	NA	NA	NA	Yes	IMR90:Mesenchymal_Stem_Cell:Mesendoderm	1.49245e-14	rs10822123:rs7075195:rs9804238:rs3858122	138
ENSG00000072422	RHOBTB1	10	62629196	62761198	0.00183823	-0.452042	0	0	0	NA	NA	NA	NA	Yes	Aorta:Mesenchymal_Stem_Cell	1.49245e-14	rs10822123:rs9804238:rs7075195	138
ENSG00000196932	TMEM26	10	63166401	63213208	1.73428e-07	-0.427367	0	0	0	NA	NA	NA	NA	Yes	IMR90	1.49245e-14	rs7075195:rs9804238	138
ENSG00000138311	ZNF365	10	64133951	64431771	3.62115e-05	-0.151965	0	0	0	NA	NA	NA	NA	Yes	Aorta:Hippocampus:Left_Ventricle:GM12878:IMR90:Mesenchymal_Stem_Cell:Mesendoderm:hESC	1.49245e-14	rs7075195:rs9804238:rs10822123:rs3858122	138
ENSG00000170871	KIAA0232	4	6783102	6885897	0.994721	-1.33294	0	0	1	2.6739e-06	0.0197055	eQTLGen_trans_eQTLs	+	No	NA	1.89937e-14	rs17207196	111
ENSG00000165810	BTNL9	5	180467225	180488523	6.53404e-10	0.811765	0	0	1	6.3977e-06	0.0404696	eQTLGen_trans_eQTLs	+	No	NA	1.89937e-14	rs17207196	111
ENSG00000137845	ADAM10	15	58887403	59042177	0.999845	-1.0323	0	0	19	1.7838e-62	0	eQTLGen_cis_eQTLs:BIOSQTL/BIOS_eQTL_geneLevel:GTEx/v8/Thyroid	-	Yes	Left_Ventricle:Liver:GM12878:IMR90:Mesenchymal_Stem_Cell:Mesendoderm:Trophoblast-like_Cell:hESC	2.0732e-14	rs11635491;rs261336;rs17821316;rs17821316:rs11635491:rs261336	184
ENSG00000128918	ALDH1A2	15	58245622	58790065	0.51663	1.67145	26	15.67	5	3.66628e-08	4.07162e-05	GTEx/v8/Liver	+	No	NA	2.0732e-14	rs17821316;rs11635491;rs261336	184
ENSG00000128923	FAM63B	15	59063391	59154099	0.189061	-0.793709	0	0	14	7.7611e-19	0	eQTLGen_cis_eQTLs	-	Yes	Left_Ventricle:Liver:GM12878:IMR90:Mesenchymal_Stem_Cell:Mesendoderm:Trophoblast-like_Cell:hESC	2.0732e-14	rs11635491;rs261336;rs17821316:rs11635491:rs261336	184
ENSG00000166035	LIPC	15	58702768	58861151	0.000171127	0.201438	24	9.281	24	5.7366e-34	0	eQTLcatalogue/CEDAR_T-cell_CD4:eQTLcatalogue/CEDAR_T-cell_CD8:eQTLGen_cis_eQTLs:BIOSQTL/BIOS_eQTL_geneLevel:GTEx/v8/Adipose_Visceral_Omentum:GTEx/v8/Esophagus_Mucosa:GTEx/v8/Liver:GTEx/v8/Pancreas	-	Yes	Left_Ventricle:Liver:GM12878:IMR90:Mesenchymal_Stem_Cell:Mesendoderm:Neural_Progenitor_Cell:Trophoblast-like_Cell:hESC	2.0732e-14	rs17821316;rs11635491;rs261336;rs11635491:rs261336	184
ENSG00000149218	ENDOD1	11	94822974	94865809	1.42162e-06	0.667335	0	0	4	4.7668e-06	0.0316276	eQTLGen_trans_eQTLs	-	No	NA	2.21205e-14	rs7075195	138
ENSG00000143641	GALNT2	1	230193536	230417870	0.881986	4.22366	92	11.93	84	1.88688e-13	0	eQTLcatalogue/TwinsUK_ge_fat:eQTLGen_cis_eQTLs:BIOSQTL/BIOS_eQTL_geneLevel:GTEx/v8/Adipose_Subcutaneous:GTEx/v8/Muscle_Skeletal	-	Yes	Aorta:Left_Ventricle:Liver:Pancreas:GM12878:IMR90:Mesenchymal_Stem_Cell:Mesendoderm:Trophoblast-like_Cell:hESC	2.4523e-14	rs2296065;rs10779835;rs2296065:rs10779835	25
ENSG00000170927	PKHD1	6	51480098	51952423	2.88609e-23	0.0141288	181	21.1	163	3.68963e-11	1.29951e-13	GTEx/v8/Skin_Not_Sun_Exposed_Suprapubic:GTEx/v8/Skin_Sun_Exposed_Lower_leg:GTEx/v8/Testis	+	Yes	Liver:GM12878:IMR90:Mesenchymal_Stem_Cell:Mesendoderm:Neural_Progenitor_Cell:Trophoblast-like_Cell:hESC	2.72047e-14	rs9382044;rs6907923;rs9473932:rs9395633:rs987237:rs12527048:rs2635727:rs4082052	93;94
ENSG00000149084	HSD17B12	11	43577986	43878167	0.00555448	-0.701698	299	18.66	309	0	0	eQTLcatalogue/Alasoo_2018_ge_macrophage_IFNg_Salmonella:eQTLcatalogue/Alasoo_2018_ge_macrophage_IFNg:eQTLcatalogue/Alasoo_2018_ge_macrophage_naive:eQTLcatalogue/Alasoo_2018_ge_macrophage_Salmonella:eQTLcatalogue/BLUEPRINT_ge_monocyte:eQTLcatalogue/BLUEPRINT_ge_neutrophil:eQTLcatalogue/BLUEPRINT_ge_T-cell:eQTLcatalogue/BrainSeq_ge_brain:eQTLcatalogue/CEDAR_B-cell_CD19:eQTLcatalogue/CEDAR_ileum:eQT…	-	Yes	Left_Ventricle:GM12878:IMR90:Mesenchymal_Stem_Cell:Mesendoderm:Neural_Progenitor_Cell:Trophoblast-like_Cell:hESC	4.50422e-14	rs4755720;rs4755202;rs4359199;rs12800235;rs1061810;rs10768994;rs4359199:rs1061810:rs1061810;rs12800235:rs10768994:rs4755720;rs12800235:rs4755720;rs12800235:rs4359199:rs4755202	149
ENSG00000110455	ACCS	11	44087475	44105772	0.000171666	-0.629897	0	0	17	3.8223e-07	0.00119431	eQTLGen_cis_eQTLs	+	Yes	Adult_Cortex:Fetal_Cortex:IMR90:Mesenchymal_Stem_Cell:Mesendoderm:Trophoblast-like_Cell:hESC	4.53666e-14	rs4755720;rs1061810;rs12800235;rs10768994;rs10768994:rs4755202;rs4359199:rs1061810:rs1061810	149
ENSG00000151348	EXT2	11	44117099	44266979	2.46055e-07	-0.914841	0	0	102	6.1273e-11	0	eQTLGen_cis_eQTLs	+	Yes	IMR90:Mesenchymal_Stem_Cell:Mesendoderm:Trophoblast-like_Cell:hESC	4.53666e-14	rs4755720;rs1061810;rs12800235;rs10768994;rs4755202;rs4359199:rs1061810:rs1061810;rs12800235:rs10768994	149
ENSG00000034533	ASTE1	3	130732719	130746493	3.39139e-12	-0.467121	0	0	0	NA	NA	NA	NA	Yes	Left_Ventricle:Liver:Right_Ventricle:GM12878:IMR90:Mesenchymal_Stem_Cell:Mesendoderm:Trophoblast-like_Cell:hESC	4.6205e-14	rs1398766:rs3749262;rs1398766;rs9876897:rs3749262:rs3749262;rs1398766:rs747501:rs3749262;rs876424:rs1320903:rs1320903;rs16838395	61
ENSG00000138246	DNAJC13	3	132136370	132257876	1	-0.0697541	0	0	56	4.8099e-08	1.35462e-09	PsychENCODE_eQTLs:eQTLGen_cis_eQTLs:GTEx/v8/Colon_Transverse	+	Yes	Left_Ventricle:Mesendoderm:Trophoblast-like_Cell:hESC	4.6205e-14	rs16838395;rs3749262;rs9876897;rs1398766;rs876424;rs9876897:rs3749262:rs1398766	61
ENSG00000114686	MRPL3	3	131181056	131221827	2.80525e-08	-0.615493	0	0	0	NA	NA	NA	NA	Yes	Left_Ventricle:IMR90:Mesenchymal_Stem_Cell:Mesendoderm:Trophoblast-like_Cell:hESC	4.6205e-14	rs1398766:rs3749262;rs1398766;rs9876897:rs3749262:rs1320903:rs1320903;rs16838395:rs11918334:rs3749262;rs1398766:rs747501:rs3749262;rs876424	61
ENSG00000114670	NEK11	3	130745694	131069309	3.82253e-17	-1.03996	0	0	0	NA	NA	NA	NA	Yes	Left_Ventricle:Liver:Right_Ventricle:GM12878:IMR90:Mesenchymal_Stem_Cell:Mesendoderm:Trophoblast-like_Cell:hESC	4.6205e-14	rs1398766:rs3749262;rs1398766;rs9876897:rs3749262:rs3749262;rs1398766:rs747501:rs3749262;rs876424:rs1320903:rs1320903;rs16838395	61
ENSG00000254614	AP003068.23	11	64945077	64949305	NA	NA	0	0	123	3.4218e-56	0	eQTLcatalogue/Lepik_2017_ge_blood:eQTLGen_cis_eQTLs:GTEx/v8/Adipose_Visceral_Omentum:GTEx/v8/Artery_Tibial:GTEx/v8/Colon_Sigmoid:GTEx/v8/Colon_Transverse:GTEx/v8/Heart_Atrial_Appendage:GTEx/v8/Heart_Left_Ventricle:GTEx/v8/Muscle_Skeletal:GTEx/v8/Nerve_Tibial:GTEx/v8/Pituitary:GTEx/v8/Skin_Not_Sun_Exposed_Suprapubic:GTEx/v8/Skin_Sun_Exposed_Lower_leg	-	No	NA	5.91567e-14	rs687672;rs630303;rs10896012;rs7946115;rs557675;rs3814707;rs501630;rs801733	152
ENSG00000254470	AP5B1	11	65543364	65548273	6.97158e-06	0.442298	0	0	125	2.3066e-10	0	eQTLcatalogue/BLUEPRINT_ge_T-cell:eQTLcatalogue/Quach_2016_ge_monocyte_IAV:eQTLcatalogue/Quach_2016_ge_monocyte_R848:PsychENCODE_eQTLs:eQTLGen_cis_eQTLs:BIOSQTL/BIOS_eQTL_geneLevel:CMC_SVA_cis:GTEx/v8/Adipose_Subcutaneous:GTEx/v8/Artery_Tibial:GTEx/v8/Colon_Sigmoid:GTEx/v8/Esophagus_Gastroesophageal_Junction:GTEx/v8/Esophagus_Mucosa:GTEx/v8/Esophagus_Muscularis:GTEx/v8/Pancreas:GTEx/v8/Skin_Not_S…	+	Yes	EP_correlation_cell_type_oneway:Adult_Cortex:Fetal_Cortex:IMR90:Mesenchymal_Stem_Cell	5.91567e-14	rs3814707;rs10896012;rs7946115;rs501630;rs687672;rs557675;rs801733;rs630303;rs630303:rs687672:rs501630:rs801733:rs557675:rs3814707	152
ENSG00000175334	BANF1	11	65769550	65771620	0.739287	-0.489761	0	0	183	7.8538e-191	0	eQTLcatalogue/Fairfax_2014_IFN24:eQTLcatalogue/Fairfax_2014_LPS24:eQTLcatalogue/Fairfax_2014_LPS2:eQTLcatalogue/Fairfax_2014_naive:eQTLcatalogue/Lepik_2017_ge_blood:eQTLGen_cis_eQTLs:BIOSQTL/BIOS_eQTL_geneLevel:GTEx/v8/Adipose_Subcutaneous:GTEx/v8/Adipose_Visceral_Omentum:GTEx/v8/Whole_Blood:GTEx/v8/Artery_Aorta:GTEx/v8/Artery_Tibial:GTEx/v8/Brain_Cortex:GTEx/v8/Breast_Mammary_Tissue:GTEx/v8/Colo…	-	Yes	Promoter_anchored_loops	5.91567e-14	rs501630;rs687672;rs630303;rs801733;rs10896012;rs7946115;rs557675;rs3814707	152
ENSG00000175573	C11orf68	11	65684279	65686588	0.409499	NA	0	0	4	1.2066e-05	1.68474e-05	eQTLGen_cis_eQTLs:GTEx/v8/Esophagus_Mucosa	NA	Yes	Promoter_anchored_loops:EP_correlation_cell_type_oneway:Spleen	5.91567e-14	rs501630;rs630303;rs630303:rs501630:rs687672:rs10896012	152
ENSG00000014216	CAPN1	11	64948037	64979477	5.0044e-05	-0.856028	0	0	80	1.2768e-29	0	eQTLGen_cis_eQTLs	-	No	NA	5.91567e-14	rs10896012;rs7946115;rs687672;rs501630	152
ENSG00000175602	CCDC85B	11	65657875	65659105	0.49138	NA	20	12.51	28	9.50484e-09	4.75242e-05	eQTLcatalogue/Nedelec_2016_ge_macrophage_Salmonella:eQTLGen_cis_eQTLs:BIOSQTL/BIOS_eQTL_geneLevel	-	Yes	Promoter_anchored_loops:Adult_Cortex:Fetal_Cortex	5.91567e-14	rs687672;rs501630;rs630303:rs501630:rs801733:rs10896012:rs687672	152
ENSG00000172757	CFL1	11	65590493	65629497	0.73105	-1.41934	63	22.9	138	2.3837e-135	0	eQTLcatalogue/BLUEPRINT_ge_neutrophil:eQTLcatalogue/BLUEPRINT_ge_T-cell:PsychENCODE_eQTLs:eQTLGen_cis_eQTLs:BIOSQTL/BIOS_eQTL_geneLevel:CMC_SVA_cis:GTEx/v8/Adipose_Subcutaneous:GTEx/v8/Whole_Blood:GTEx/v8/Artery_Tibial:GTEx/v8/Breast_Mammary_Tissue:GTEx/v8/Colon_Sigmoid:GTEx/v8/Esophagus_Muscularis:GTEx/v8/Lung:GTEx/v8/Nerve_Tibial:GTEx/v8/Cells_Cultured_fibroblasts:GTEx/v8/Testis:GTEx/v8/Thyroid	-	Yes	Promoter_anchored_loops:Adult_Cortex:Fetal_Cortex	5.91567e-14	rs687672;rs630303;rs501630;rs801733;rs10896012;rs7946115;rs479315;rs687672:rs501630:rs801733	152
ENSG00000174871	CNIH2	11	66045661	66052772	0.89454	NA	3	9.83	1	3.84898e-05	1.8316e-05	GTEx/v8/Spleen	NA	Yes	Promoter_anchored_loops:Adult_Cortex:Fetal_Cortex:GM12878:IMR90:Mesenchymal_Stem_Cell:Trophoblast-like_Cell	5.91567e-14	rs801733;rs687672:rs630303:rs501630:rs479315:rs10896012	152
ENSG00000174080	CTSF	11	66330934	66336312	1.32811e-13	0.919673	0	0	62	1.6258e-108	0	eQTLcatalogue/Lepik_2017_ge_blood:eQTLGen_cis_eQTLs:BIOSQTL/BIOS_eQTL_geneLevel:GTEx/v8/Whole_Blood:GTEx/v8/Artery_Aorta:GTEx/v8/Artery_Tibial:GTEx/v8/Esophagus_Gastroesophageal_Junction:GTEx/v8/Esophagus_Mucosa:GTEx/v8/Esophagus_Muscularis:GTEx/v8/Nerve_Tibial:GTEx/v8/Cells_Cultured_fibroblasts:GTEx/v8/Thyroid	+	No	NA	5.91567e-14	rs479315;rs10896012;rs7946115;rs501630;rs687672;rs801733	152
ENSG00000172543	CTSW	11	65647280	65651212	2.6259e-07	0.389375	26	14.23	207	3.27167000000001e-310	0	eQTLcatalogue/Alasoo_2018_ge_macrophage_IFNg:eQTLcatalogue/Alasoo_2018_ge_macrophage_naive:eQTLcatalogue/Alasoo_2018_ge_macrophage_Salmonella:eQTLcatalogue/BLUEPRINT_ge_monocyte:eQTLcatalogue/BLUEPRINT_ge_T-cell:eQTLcatalogue/CEDAR_monocyte_CD14:eQTLcatalogue/CEDAR_platelet:eQTLcatalogue/CEDAR_rectum:eQTLcatalogue/CEDAR_T-cell_CD4:eQTLcatalogue/CEDAR_T-cell_CD8:eQTLcatalogue/CEDAR_transverse_colo…	-	Yes	Adult_Cortex:Fetal_Cortex	5.91567e-14	rs501630;rs687672;rs630303;rs7946115;rs10896012;rs557675;rs3814707;rs801733;rs479315;rs7946115:rs630303:rs687672:rs801733:rs10896012	152
ENSG00000175550	DRAP1	11	65686728	65689032	0.215306	NA	0	0	5	5.03607e-06	1.15647e-07	GTEx/v8/Brain_Cerebellum:GTEx/v8/Thyroid	-	Yes	Promoter_anchored_loops:EP_correlation_cell_type_oneway:Spleen	5.91567e-14	rs501630;rs630303;rs630303:rs501630:rs687672:rs10896012	152
ENSG00000172638	EFEMP2	11	65633912	65641063	0.0283882	NA	40	22.9	142	3.27170000000001e-310	0	eQTLcatalogue/BLUEPRINT_ge_neutrophil:eQTLcatalogue/BLUEPRINT_ge_T-cell:eQTLcatalogue/BrainSeq_ge_brain:eQTLcatalogue/Fairfax_2012_B-cell_CD19:eQTLcatalogue/Fairfax_2014_IFN24:eQTLcatalogue/Fairfax_2014_LPS24:eQTLcatalogue/GENCORD_ge_T-cell:eQTLcatalogue/GEUVADIS_ge_LCL:eQTLcatalogue/Kasela_2017_T-cell_CD4:eQTLcatalogue/Kasela_2017_T-cell_CD8:eQTLcatalogue/Lepik_2017_ge_blood:eQTLcatalogue/Nedele…	+	Yes	Promoter_anchored_loops:Adult_Cortex:Fetal_Cortex	5.91567e-14	rs630303;rs501630;rs687672;rs3814707;rs801733;rs479315;rs7946115;rs557675;rs10896012:rs687672:rs7946115:rs630303:rs801733	152
ENSG00000173442	EHBP1L1	11	65343509	65360121	8.08132e-07	NA	24	14.78	83	4.1015e-34	0	eQTLGen_cis_eQTLs:BIOSQTL/BIOS_eQTL_geneLevel:GTEx/v8/Whole_Blood:GTEx/v8/Heart_Left_Ventricle:GTEx/v8/Nerve_Tibial	-	Yes	EP_links_oneway:Promoter_anchored_loops:Adult_Cortex:Fetal_Cortex	5.91567e-14	rs10896012;rs7946115;rs501630;rs10896012:rs630303:rs501630:rs801733:rs7946115:rs687672	152
ENSG00000175376	EIF1AD	11	65764016	65769647	0.181571	0.402588	0	0	108	3.06773e-22	8.58431e-36	BIOSQTL/BIOS_eQTL_geneLevel:GTEx/v8/Adipose_Subcutaneous:GTEx/v8/Artery_Aorta:GTEx/v8/Breast_Mammary_Tissue:GTEx/v8/Esophagus_Mucosa:GTEx/v8/Esophagus_Muscularis:GTEx/v8/Heart_Left_Ventricle:GTEx/v8/Liver:GTEx/v8/Lung:GTEx/v8/Muscle_Skeletal:GTEx/v8/Nerve_Tibial:GTEx/v8/Cells_Cultured_fibroblasts:GTEx/v8/Skin_Not_Sun_Exposed_Suprapubic:GTEx/v8/Skin_Sun_Exposed_Lower_leg:GTEx/v8/Testis:GTEx/v8/Thy…	+	Yes	Promoter_anchored_loops	5.91567e-14	rs501630;rs801733;rs7946115;rs687672;rs630303;rs3814707;rs557675;rs10896012	152
ENSG00000176973	FAM89B	11	65339820	65341669	0.0291385	NA	3	10.27	111	1.6737e-28	0	eQTLGen_cis_eQTLs:BIOSQTL/BIOS_eQTL_geneLevel:GTEx/v8/Muscle_Skeletal	-	Yes	EP_links_oneway:Promoter_anchored_loops:Adult_Cortex:Fetal_Cortex	5.91567e-14	rs10896012;rs7946115;rs3814707;rs501630;rs630303;rs687672;rs801733;rs10896012:rs630303:rs501630:rs801733:rs7946115:rs687672	152
ENSG00000149806	FAU	11	64888100	64889945	0.768145	-0.28664	0	0	0	NA	NA	NA	NA	Yes	Promoter_anchored_loops:Adult_Cortex:Fetal_Cortex:Liver:Spleen:GM12878	5.91567e-14	rs630303:rs10896012:rs7946115:rs687672:rs501630:rs801733	152
ENSG00000172500	FIBP	11	65651212	65656010	0.0147228	-0.597473	29	12.51	206	3.27167000000001e-310	0	eQTLcatalogue/Alasoo_2018_ge_macrophage_IFNg_Salmonella:eQTLcatalogue/Alasoo_2018_ge_macrophage_IFNg:eQTLcatalogue/Alasoo_2018_ge_macrophage_Salmonella:eQTLcatalogue/BLUEPRINT_ge_neutrophil:eQTLcatalogue/BrainSeq_ge_brain:eQTLcatalogue/CEDAR_T-cell_CD4:eQTLcatalogue/CEDAR_T-cell_CD8:eQTLcatalogue/Fairfax_2014_IFN24:eQTLcatalogue/Fairfax_2014_LPS24:eQTLcatalogue/Fairfax_2014_LPS2:eQTLcatalogue/GEN…	+	Yes	Promoter_anchored_loops:Adult_Cortex:Fetal_Cortex	5.91567e-14	rs501630;rs687672;rs630303;rs10896012;rs7946115;rs801733;rs557675;rs3814707;rs630303:rs501630:rs801733	152
ENSG00000175592	FOSL1	11	65659520	65668044	0.289796	-0.19381	19	12.51	29	6.58095e-06	0.000529563	GTEx/v8/Skin_Sun_Exposed_Lower_leg	-	Yes	Promoter_anchored_loops:Adult_Cortex:Fetal_Cortex	5.91567e-14	rs687672;rs501630;rs801733:rs10896012:rs687672:rs630303:rs501630	152
ENSG00000172977	KAT5	11	65479467	65487075	0.471178	-0.933539	0	0	89	3.19846e-37	0	eQTLcatalogue/BLUEPRINT_ge_neutrophil:BIOSQTL/BIOS_eQTL_geneLevel:GTEx/v8/Whole_Blood	-	Yes	Promoter_anchored_loops:Adult_Cortex:GM12878:IMR90:Mesenchymal_Stem_Cell	5.91567e-14	rs557675;rs10896012;rs7946115;rs3814707;rs687672;rs630303:rs501630:rs687672:rs557675:rs3814707	152
ENSG00000168056	LTBP3	11	65306276	65326401	0.996034	NA	10	12.77	161	3.27170000000001e-310	0	eQTLcatalogue/BLUEPRINT_ge_T-cell:eQTLcatalogue/Fairfax_2014_naive:eQTLcatalogue/GENCORD_ge_fibroblast:eQTLcatalogue/GENCORD_ge_T-cell:eQTLcatalogue/Lepik_2017_ge_blood:eQTLcatalogue/Quach_2016_ge_monocyte_IAV:eQTLcatalogue/TwinsUK_ge_blood:eQTLGen_cis_eQTLs:BIOSQTL/BIOS_eQTL_geneLevel:GTEx/v8/Adipose_Subcutaneous:GTEx/v8/Adipose_Visceral_Omentum:GTEx/v8/Whole_Blood:GTEx/v8/Artery_Tibial:GTEx/v8/…	+	No	NA	5.91567e-14	rs10896012;rs7946115;rs3814707;rs687672;rs630303;rs501630;rs479315	152
ENSG00000173327	MAP3K11	11	65365226	65382853	0.170283	-0.757764	20	14.78	191	4.5383e-306	0	eQTLcatalogue/BLUEPRINT_ge_monocyte:eQTLcatalogue/BLUEPRINT_ge_T-cell:eQTLcatalogue/Fairfax_2012_B-cell_CD19:eQTLcatalogue/Fairfax_2014_naive:eQTLcatalogue/Kasela_2017_T-cell_CD4:eQTLcatalogue/Kasela_2017_T-cell_CD8:eQTLcatalogue/Naranbhai_2015_neutrophil_CD16:eQTLcatalogue/TwinsUK_ge_fat:PsychENCODE_eQTLs:eQTLGen_cis_eQTLs:BIOSQTL/BIOS_eQTL_geneLevel:GTEx/v8/Adipose_Subcutaneous:GTEx/v8/Adipose_…	-	Yes	EP_links_oneway:Promoter_anchored_loops:Adult_Cortex:Fetal_Cortex	5.91567e-14	rs7946115;rs557675;rs501630;rs10896012;rs687672;rs630303;rs801733;rs3814707;rs7946115:rs10896012:rs630303:rs501630:rs687672:rs801733	152
ENSG00000149792	MRPL49	11	64889655	64894843	0.0423029	-0.117863	0	0	0	NA	NA	NA	NA	Yes	Promoter_anchored_loops:Adult_Cortex:Fetal_Cortex:Liver:Spleen:GM12878	5.91567e-14	rs630303:rs10896012:rs7946115:rs687672:rs501630:rs801733	152
ENSG00000172732	MUS81	11	65624597	65635124	1.57726e-06	-0.100509	39	22.9	175	1.8981e-102	0	eQTLcatalogue/BLUEPRINT_ge_neutrophil:eQTLGen_cis_eQTLs:BIOSQTL/BIOS_eQTL_geneLevel:CMC_SVA_cis:GTEx/v8/Adipose_Subcutaneous:GTEx/v8/Whole_Blood:GTEx/v8/Artery_Aorta:GTEx/v8/Artery_Tibial:GTEx/v8/Breast_Mammary_Tissue:GTEx/v8/Colon_Sigmoid:GTEx/v8/Colon_Transverse:GTEx/v8/Nerve_Tibial:GTEx/v8/Thyroid	-	Yes	Promoter_anchored_loops:Adult_Cortex:Fetal_Cortex	5.91567e-14	rs630303;rs687672;rs501630;rs10896012;rs7946115;rs801733;rs687672:rs501630:rs801733	152
ENSG00000172818	OVOL1	11	65554493	65564690	0.676796	-0.557877	11	13.86	109	2.79481e-11	8.09329e-17	eQTLcatalogue/GENCORD_ge_T-cell:eQTLcatalogue/TwinsUK_ge_skin:PsychENCODE_eQTLs:GTEx/v8/Cells_EBV-transformed_lymphocytes:GTEx/v8/Brain_Cerebellar_Hemisphere:GTEx/v8/Brain_Cerebellum:GTEx/v8/Brain_Nucleus_accumbens_basal_ganglia:GTEx/v8/Brain_Putamen_basal_ganglia:GTEx/v8/Pancreas:GTEx/v8/Thyroid	-	Yes	IMR90:Mesenchymal_Stem_Cell	5.91567e-14	rs557675;rs3814707;rs501630;rs7946115;rs687672;rs630303;rs557675:rs3814707:rs501630:rs687672:rs630303	152
ENSG00000197136	PCNXL3	11	65383244	65404910	0.48826	NA	0	0	88	2.4793e-31	0	eQTLGen_cis_eQTLs:BIOSQTL/BIOS_eQTL_geneLevel:GTEx/v8/Adipose_Subcutaneous:GTEx/v8/Brain_Cerebellum:GTEx/v8/Esophagus_Gastroesophageal_Junction:GTEx/v8/Esophagus_Mucosa:GTEx/v8/Nerve_Tibial:GTEx/v8/Pancreas:GTEx/v8/Testis:GTEx/v8/Thyroid	-	Yes	EP_links_oneway:Promoter_anchored_loops:Adult_Cortex:Fetal_Cortex	5.91567e-14	rs10896012;rs557675;rs3814707;rs7946115;rs687672;rs501630;rs630303;rs7946115:rs10896012:rs630303:rs501630:rs687672:rs801733	152
ENSG00000174791	RIN1	11	66097713	66104311	0.000202047	-0.239759	1	8.285	109	6.0533e-25	0	eQTLGen_cis_eQTLs:BIOSQTL/BIOS_eQTL_geneLevel:CMC_SVA_cis:GTEx/v8/Whole_Blood	-	Yes	Promoter_anchored_loops:Adult_Cortex:GM12878:IMR90:Mesenchymal_Stem_Cell:Trophoblast-like_Cell	5.91567e-14	rs479315;rs557675;rs3814707;rs501630;rs687672;rs630303;rs801733;rs687672:rs630303:rs501630:rs801733	152
ENSG00000172922	RNASEH2C	11	65482367	65488418	0.511932	-0.196964	0	0	151	1.848e-90	0	eQTLcatalogue/BrainSeq_ge_brain:eQTLcatalogue/GEUVADIS_ge_LCL:eQTLcatalogue/Lepik_2017_ge_blood:eQTLcatalogue/TwinsUK_ge_blood:eQTLcatalogue/TwinsUK_ge_fat:eQTLcatalogue/TwinsUK_ge_skin:PsychENCODE_eQTLs:eQTLGen_cis_eQTLs:BIOSQTL/BIOS_eQTL_geneLevel:CMC_SVA_cis:GTEx/v8/Adipose_Subcutaneous:GTEx/v8/Adipose_Visceral_Omentum:GTEx/v8/Adrenal_Gland:GTEx/v8/Whole_Blood:GTEx/v8/Artery_Aorta:GTEx/v8/Arte…	-	Yes	Promoter_anchored_loops:Adult_Cortex:GM12878:IMR90:Mesenchymal_Stem_Cell	5.91567e-14	rs3814707;rs687672;rs10896012;rs7946115;rs557675;rs630303;rs630303:rs501630:rs687672:rs557675:rs3814707	152
ENSG00000175467	SART1	11	65729160	65747299	0.992556	-0.00287459	0	0	62	6.0157e-16	0	eQTLGen_cis_eQTLs	-	Yes	Promoter_anchored_loops	5.91567e-14	rs3814707;rs501630;rs630303;rs687672;rs10896012:rs687672:rs630303:rs501630	152
ENSG00000213445	SIPA1	11	65405568	65418401	0.0279051	-0.251279	0	0	84	9.6081e-23	0	eQTLcatalogue/HipSci_ge_iPSC:eQTLcatalogue/Quach_2016_ge_monocyte_IAV:eQTLGen_cis_eQTLs:BIOSQTL/BIOS_eQTL_geneLevel:GTEx/v8/Adipose_Subcutaneous:GTEx/v8/Esophagus_Gastroesophageal_Junction:GTEx/v8/Esophagus_Mucosa:GTEx/v8/Esophagus_Muscularis:GTEx/v8/Lung:GTEx/v8/Nerve_Tibial:GTEx/v8/Cells_Cultured_fibroblasts	+	Yes	Adult_Cortex:Fetal_Cortex	5.91567e-14	rs3814707;rs557675;rs501630;rs630303;rs687672;rs10896012:rs7946115:rs687672:rs630303:rs501630:rs801733:rs557675:rs3814707	152
ENSG00000110025	SNX15	11	64794880	64808044	0.000705751	0.299275	0	0	22	2.1267e-06	0.00617824	eQTLGen_cis_eQTLs	-	Yes	Promoter_anchored_loops	5.91567e-14	rs687672	152
ENSG00000172803	SNX32	11	65601112	65624367	2.72867e-13	0.151678	43	22.9	207	0	0	eQTLcatalogue/GENCORD_ge_fibroblast:eQTLcatalogue/GENCORD_ge_LCL:eQTLcatalogue/GENCORD_ge_T-cell:eQTLcatalogue/GEUVADIS_ge_LCL:eQTLcatalogue/HipSci_ge_iPSC:eQTLcatalogue/Nedelec_2016_ge_macrophage_Listeria:eQTLcatalogue/Nedelec_2016_ge_macrophage_naive:eQTLcatalogue/Nedelec_2016_ge_macrophage_Salmonella:eQTLcatalogue/Quach_2016_ge_monocyte_IAV:eQTLcatalogue/Quach_2016_ge_monocyte_LPS:eQTLcatalogu…	+	Yes	Adult_Cortex:Fetal_Cortex	5.91567e-14	rs501630;rs687672;rs630303;rs7946115;rs10896012;rs801733;rs479315;rs557675;rs3814707;rs687672:rs630303:rs501630:rs10896012:rs801733	152
ENSG00000204710	SPDYC	11	64937625	64940715	0.00185515	0.11629	0	0	159	9.8157e-33	0	eQTLcatalogue/Lepik_2017_ge_blood:eQTLGen_cis_eQTLs	-	No	NA	5.91567e-14	rs687672;rs801733;rs10896012;rs7946115;rs3814707;rs557675;rs501630;rs630303	152
ENSG00000173465	SSSCA1	11	65337901	65341413	0.00200151	-0.0763605	3	10.27	2	4.20137e-07	0.000295302	BIOSQTL/BIOS_eQTL_geneLevel	+	Yes	Promoter_anchored_loops:Adult_Cortex:Fetal_Cortex	5.91567e-14	rs10896012;rs10896012:rs7946115:rs687672:rs630303:rs501630:rs801733	152
ENSG00000149809	TM7SF2	11	64879317	64883856	0.000447934	-0.519681	0	0	0	NA	NA	NA	NA	Yes	Promoter_anchored_loops:Adult_Cortex:Fetal_Cortex:Liver:Spleen:GM12878	5.91567e-14	rs687672:rs630303:rs501630:rs10896012:rs7946115:rs801733	152
ENSG00000174276	ZNHIT2	11	64883875	64885170	0.200833	-0.288237	0	0	3	1.1764e-06	0.005882	eQTLcatalogue/CEDAR_transverse_colon	+	Yes	Adult_Cortex:Fetal_Cortex:Liver:Spleen:GM12878	5.91567e-14	rs3814707;rs10896012:rs7946115:rs687672:rs630303:rs501630:rs801733	152
ENSG00000175220	ARHGAP1	11	46698630	46722165	0.185565	-0.389142	17	22.5	463	1.98668e-32	0	eQTLcatalogue/TwinsUK_ge_fat:eQTLcatalogue/TwinsUK_ge_skin:eQTLGen_cis_eQTLs:BIOSQTL/BIOS_eQTL_geneLevel:GTEx/v8/Adipose_Subcutaneous:GTEx/v8/Adipose_Visceral_Omentum:GTEx/v8/Whole_Blood:GTEx/v8/Artery_Aorta:GTEx/v8/Artery_Tibial:GTEx/v8/Brain_Amygdala:GTEx/v8/Brain_Cortex:GTEx/v8/Breast_Mammary_Tissue:GTEx/v8/Colon_Sigmoid:GTEx/v8/Colon_Transverse:GTEx/v8/Esophagus_Gastroesophageal_Junction:GTEx…	+	Yes	Promoter_anchored_loops:IMR90:Mesenchymal_Stem_Cell:Mesendoderm:Trophoblast-like_Cell:hESC	6.74678e-14	rs3136441;rs10838620;rs10769254;rs7118178;rs10838760;rs7928842;rs3781627;rs7941758;rs10838681;rs2697920;rs2305280;rs3136441:rs10838620:rs10838681:rs10769254;rs2305280:rs10769254:rs2305280	150
ENSG00000175216	CKAP5	11	46764598	46867847	1	-0.360017	57	15.4	176	3.45128e-07	0.00172564	eQTLcatalogue/Kasela_2017_T-cell_CD4:eQTLcatalogue/Kasela_2017_T-cell_CD8:GTEx/v8/Thyroid	+	Yes	Adult_Cortex:Fetal_Cortex:GM12878:IMR90:Mesenchymal_Stem_Cell:Mesendoderm:Trophoblast-like_Cell:hESC	6.74678e-14	rs3136441;rs10838620;rs10838760;rs10838620:rs10838681:rs3136441:rs10769254:rs2305280:rs10769254;rs2305280:rs2697920:rs7928842;rs3781627:rs7118178	150
ENSG00000180210	F2	11	46740730	46761056	0.959943	-0.037985	25	15.05	301	5.4241e-16	0	PsychENCODE_eQTLs:BIOSQTL/BIOS_eQTL_geneLevel:GTEx/v8/Adipose_Subcutaneous:GTEx/v8/Artery_Coronary:GTEx/v8/Artery_Tibial:GTEx/v8/Brain_Cerebellar_Hemisphere:GTEx/v8/Brain_Cerebellum:GTEx/v8/Colon_Transverse:GTEx/v8/Esophagus_Gastroesophageal_Junction:GTEx/v8/Esophagus_Muscularis:GTEx/v8/Testis	+	Yes	IMR90:Mesenchymal_Stem_Cell:Mesendoderm:Trophoblast-like_Cell:hESC	6.74678e-14	rs3136441;rs10838620;rs10769254;rs10838681;rs2305280;rs10838620:rs10838681:rs10769254;rs2305280:rs10769254:rs2305280	150
ENSG00000165912	PACSIN3	11	47199076	47207994	0.016793	-0.514939	10	9.421	622	1.43895e-17	7.2019e-28	eQTLcatalogue/TwinsUK_ge_skin:PsychENCODE_eQTLs:BIOSQTL/BIOS_eQTL_geneLevel:CMC_SVA_cis:GTEx/v8/Artery_Aorta:GTEx/v8/Brain_Cortex:GTEx/v8/Brain_Hypothalamus:GTEx/v8/Colon_Sigmoid:GTEx/v8/Colon_Transverse:GTEx/v8/Esophagus_Mucosa:GTEx/v8/Esophagus_Muscularis:GTEx/v8/Prostate:GTEx/v8/Cells_Cultured_fibroblasts:GTEx/v8/Skin_Not_Sun_Exposed_Suprapubic:GTEx/v8/Skin_Sun_Exposed_Lower_leg:GTEx/v8/Thyroid	+	Yes	Promoter_anchored_loops:Adult_Cortex	6.74678e-14	rs10838620;rs10838681;rs7928842;rs3781627;rs7941758;rs3136441;rs10769254;rs2305280;rs2697920;rs7118178;rs10838760;rs3136441:rs10838681:rs10769254:rs2305280:rs2697920:rs7928842;rs3781627:rs7118178	150
ENSG00000175213	ZNF408	11	46722368	46727462	7.89161e-06	-0.0780348	13	22.5	378	6.2833e-16	1.26003e-11	PsychENCODE_eQTLs:BIOSQTL/BIOS_eQTL_geneLevel:GTEx/v8/Adipose_Visceral_Omentum:GTEx/v8/Artery_Aorta:GTEx/v8/Artery_Tibial:GTEx/v8/Colon_Transverse:GTEx/v8/Esophagus_Mucosa:GTEx/v8/Esophagus_Muscularis:GTEx/v8/Liver:GTEx/v8/Lung:GTEx/v8/Nerve_Tibial:GTEx/v8/Pancreas:GTEx/v8/Pituitary:GTEx/v8/Prostate:GTEx/v8/Stomach:GTEx/v8/Thyroid	+	Yes	Promoter_anchored_loops:IMR90:Mesenchymal_Stem_Cell:Mesendoderm:Trophoblast-like_Cell:hESC	6.74678e-14	rs10838620;rs3136441;rs10769254;rs2305280;rs10838681;rs2697920;rs7118178;rs3136441:rs10838620:rs10838681:rs10769254;rs2305280:rs10769254:rs2305280	150
ENSG00000182685	BRICD5	16	2259254	2261951	1.62462e-10	2.23471	0	0	5	4.424e-06	0.0126588	eQTLGen_cis_eQTLs:GTEx/v8/Brain_Frontal_Cortex_BA9	-	No	NA	7.49506e-14	rs3211995;rs2516740	192
ENSG00000167965	MLST8	16	2254249	2259417	0.629654	NA	0	0	53	5.2187e-20	0	eQTLcatalogue/Fairfax_2014_IFN24:eQTLcatalogue/Fairfax_2014_LPS24:eQTLGen_cis_eQTLs:GTEx/v8/Brain_Cerebellum:GTEx/v8/Cells_Cultured_fibroblasts	+	Yes	Promoter_anchored_loops:Adult_Cortex:Fetal_Cortex	7.49506e-14	rs3087631;rs36232;rs3211995;rs2516740;rs36232:rs3211995	192
ENSG00000065057	NTHL1	16	2089816	2097867	1.76611e-09	NA	9	11.87	52	1.8667e-21	0	eQTLGen_cis_eQTLs:BIOSQTL/BIOS_eQTL_geneLevel:GTEx/v8/Adipose_Subcutaneous:GTEx/v8/Whole_Blood:GTEx/v8/Breast_Mammary_Tissue:GTEx/v8/Thyroid	-	Yes	Adult_Cortex:Fetal_Cortex	7.49506e-14	rs3211995;rs2516740;rs3087631;rs36232	192
ENSG00000008710	PKD1	16	2138711	2185899	0.999905	NA	45	15.78	55	1.2545e-20	0	eQTLcatalogue/BLUEPRINT_ge_T-cell:eQTLcatalogue/Kasela_2017_T-cell_CD8:eQTLcatalogue/Lepik_2017_ge_blood:eQTLcatalogue/TwinsUK_ge_blood:eQTLcatalogue/TwinsUK_ge_fat:eQTLGen_cis_eQTLs:BIOSQTL/BIOS_eQTL_geneLevel:GTEx/v8/Adipose_Subcutaneous:GTEx/v8/Adipose_Visceral_Omentum:GTEx/v8/Artery_Tibial:GTEx/v8/Esophagus_Muscularis:GTEx/v8/Nerve_Tibial:GTEx/v8/Testis	+	Yes	Promoter_anchored_loops	7.49506e-14	rs3087631;rs36232;rs3211995;rs2516740;rs3211995:rs3087631	192
ENSG00000167964	RAB26	16	2190804	2204166	3.55738e-06	NA	11	9.355	33	7.10643e-08	0.000369548	GTEx/v8/Brain_Cerebellar_Hemisphere:GTEx/v8/Brain_Cerebellum:GTEx/v8/Skin_Sun_Exposed_Lower_leg	-	No	NA	7.49506e-14	rs36232;rs3211995;rs2516740;rs3087631	192
ENSG00000065054	SLC9A3R2	16	2075357	2089027	0.0227038	NA	9	11.87	52	1.62424e-62	5.17341e-59	PsychENCODE_eQTLs:xQTLServer_eQTLs:CMC_SVA_cis:CMC_NoSVA_cis:GTEx/v8/Brain_Cerebellar_Hemisphere	+	No	NA	7.49506e-14	rs3211995;rs2516740;rs3087631;rs36232	192
ENSG00000127561	SYNGR3	16	2039661	2044276	0.292055	-0.506579	0	0	9	1.6441e-08	8.95771e-05	eQTLGen_cis_eQTLs:BIOSQTL/BIOS_eQTL_geneLevel	+	Yes	Adult_Cortex:Fetal_Cortex:Aorta:Left_Ventricle:IMR90:Mesenchymal_Stem_Cell	7.49506e-14	rs3211995;rs2516740;rs3211995:rs36232:rs12925669:rs11866815;rs12925669:rs11866815	191;192
ENSG00000103197	TSC2	16	2097466	2138716	1	NA	26	11.87	53	5.14328e-11	0	eQTLcatalogue/BrainSeq_ge_brain:eQTLcatalogue/Fairfax_2014_naive:PsychENCODE_eQTLs:BIOSQTL/BIOS_eQTL_geneLevel:xQTLServer_eQTLs:CMC_SVA_cis:GTEx/v8/Artery_Tibial:GTEx/v8/Brain_Cerebellar_Hemisphere:GTEx/v8/Brain_Cerebellum:GTEx/v8/Brain_Cortex:GTEx/v8/Esophagus_Muscularis:GTEx/v8/Stomach	+	Yes	Adult_Cortex:Fetal_Cortex	7.49506e-14	rs3211995;rs2516740;rs3087631;rs36232	192
ENSG00000181315	ZNF322	6	26636518	26659980	NA	-1.14047	0	0	59	1.0151e-07	4.24655e-62	eQTLcatalogue/Lepik_2017_ge_blood:eQTLGen_cis_eQTLs:GTEx/v8/Adipose_Subcutaneous:GTEx/v8/Adipose_Visceral_Omentum:GTEx/v8/Artery_Tibial:GTEx/v8/Brain_Hippocampus:GTEx/v8/Breast_Mammary_Tissue:GTEx/v8/Esophagus_Muscularis:GTEx/v8/Heart_Atrial_Appendage:GTEx/v8/Lung:GTEx/v8/Muscle_Skeletal:GTEx/v8/Nerve_Tibial:GTEx/v8/Cells_Cultured_fibroblasts:GTEx/v8/Testis:GTEx/v8/Thyroid	-	Yes	Fetal_Cortex:Left_Ventricle:GM12878	7.52895e-14	rs6916289;rs2066295;rs9379831;rs4145878;rs2893843;rs6916289:rs2893843	88
ENSG00000129968	ABHD17A	19	1876809	1885546	0.0505569	NA	27	6.801	81	1.32484e-09	2.41722e-06	PsychENCODE_eQTLs:eQTLGen_cis_eQTLs:BIOSQTL/BIOS_eQTL_geneLevel:GTEx/v8/Nerve_Tibial:GTEx/v8/Testis	+	Yes	Promoter_anchored_loops	7.7543e-14	rs3810417;rs12981256;rs3810417:rs12981256	221
ENSG00000213638	ADAT3	19	1905377	1913444	0.00117965	-0.520293	1	0.694	39	9.538e-17	0	eQTLGen_cis_eQTLs:BIOSQTL/BIOS_eQTL_geneLevel:GTEx/v8/Minor_Salivary_Gland:GTEx/v8/Skin_Sun_Exposed_Lower_leg	-	Yes	Promoter_anchored_loops	7.7543e-14	rs12981256;rs3810417;rs2074881	221
ENSG00000104899	AMH	19	2249308	2252072	4.89547e-05	0.0588778	0	0	33	9.85224e-06	0.00107672	PsychENCODE_eQTLs	+	No	NA	7.7543e-14	rs12981256	221
ENSG00000130270	ATP8B3	19	1782074	1812275	9.18833e-22	0.242628	9	15.23	94	2.60942e-58	0	eQTLcatalogue/TwinsUK_ge_fat:eQTLcatalogue/TwinsUK_ge_LCL:eQTLcatalogue/TwinsUK_ge_skin:DICE/T_CD4_naive:DICE/Monocyte_classical:DICE/NK:DICE/T_CD4_TFH:DICE/T_CD4_TH17:DICE/T_CD4_TH1_17:DICE/T_CD4_TH2:DICE/T_CD4_memory_TREG:DICE/T_CD4_naive_TREG:eQTLGen_cis_eQTLs:BIOSQTL/BIOS_eQTL_geneLevel:GTEx/v8/Adipose_Subcutaneous:GTEx/v8/Adipose_Visceral_Omentum:GTEx/v8/Adrenal_Gland:GTEx/v8/Whole_Blood:GTE…	-	No	NA	7.7543e-14	rs12981256;rs3810417	221
ENSG00000129911	KLF16	19	1852399	1863567	0.473219	0.212637	47	18.17	101	4.71175e-16	0	PsychENCODE_eQTLs:BIOSQTL/BIOS_eQTL_geneLevel:xQTLServer_eQTLs:GTEx/v8/Esophagus_Gastroesophageal_Junction:GTEx/v8/Esophagus_Muscularis:GTEx/v8/Cells_Cultured_fibroblasts:GTEx/v8/Thyroid	-	Yes	Promoter_anchored_loops:EP_correlation_cell_type_oneway:EP_correlation_organ_oneway:Adult_Cortex:Fetal_Cortex	7.7543e-14	rs3810417;rs12981256;rs12981256:rs3810417:rs2074881	221
ENSG00000079313	REXO1	19	1815248	1848452	0.567928	NA	69	15.23	106	2.03078e-26	0	eQTLcatalogue/Alasoo_2018_ge_macrophage_IFNg_Salmonella:eQTLcatalogue/Alasoo_2018_ge_macrophage_naive:eQTLcatalogue/Alasoo_2018_ge_macrophage_Salmonella:eQTLcatalogue/BLUEPRINT_ge_monocyte:BIOSQTL/BIOS_eQTL_geneLevel:CMC_SVA_cis:GTEx/v8/Adrenal_Gland:GTEx/v8/Spleen	+	Yes	Adult_Cortex:Fetal_Cortex	7.7543e-14	rs12981256;rs3810417;rs12981256:rs2074881	221
ENSG00000227500	SCAMP4	19	1905213	1926016	0.0209517	-0.712428	1	0.694	46	1.2162e-22	0	eQTLcatalogue/BLUEPRINT_ge_neutrophil:eQTLGen_cis_eQTLs:BIOSQTL/BIOS_eQTL_geneLevel:GTEx/v8/Adipose_Subcutaneous:GTEx/v8/Brain_Cerebellar_Hemisphere:GTEx/v8/Lung:GTEx/v8/Nerve_Tibial	-	Yes	Promoter_anchored_loops	7.7543e-14	rs12981256;rs3810417;rs2074881	221
ENSG00000267059	UQCR11	19	1578338	1605444	NA	-0.522585	0	0	0	NA	NA	NA	NA	Yes	Adult_Cortex:Fetal_Cortex:IMR90	7.7543e-14	rs12981256:rs3810417:rs2074881	221
ENSG00000127540	UQCR11	19	1597171	1605480	0.0305035	-0.522585	0	0	0	NA	NA	NA	NA	Yes	Adult_Cortex:Fetal_Cortex:IMR90	7.7543e-14	rs12981256:rs3810417:rs2074881	221
ENSG00000124578	HIST1H4G	6	26246886	26247259	0.00263	-0.0509409	2	4.068	0	NA	NA	NA	NA	No	NA	7.81107e-14	rs806794;rs2893843	88
ENSG00000164220	F2RL2	5	75911307	75919259	7.36707e-07	0.522212	0	0	20	0.000213816	0.0162169	PsychENCODE_eQTLs	+	No	NA	1.04689e-13	rs2047059;rs17649350;rs2307111	78
ENSG00000137309	HMGA1	6	34204650	34214008	0.7243	-0.910116	19	15.93	29	1.69017e-09	8.45085e-06	eQTLcatalogue/Fairfax_2014_naive:DICE/T_CD4_TFH	-	Yes	Promoter_anchored_loops	1.19546e-13	rs7742369;rs1150781	90
ENSG00000163235	TGFA	2	70674412	70781325	0.574368	0.308664	0	0	3	1.5275e-06	0.0119037	eQTLGen_trans_eQTLs	+	No	NA	1.21963e-13	rs4776981	186
ENSG00000101421	CHMP4B	20	32399110	32442172	0.881586	NA	0	0	155	5.933e-10	0	eQTLGen_cis_eQTLs:eQTLGen_trans_eQTLs	-	Yes	Adrenal:Aorta:Bladder:Dorsolateral_Prefrontal_Cortex:Hippocampus:Left_Ventricle:Liver:Lung:Pancreas:Psoas:Right_Ventricle:Small_Bowel:Spleen:GM12878:IMR90:Mesenchymal_Stem_Cell:Mesendoderm:Neural_Progenitor_Cell:Trophoblast-like_Cell:hESC	1.21963e-13	rs2268082;rs12624640;rs6088520;rs4776981;rs2268082:rs12624640;rs6088520:rs6088520	186;230
ENSG00000269205	AC005606.1	16	2031633	2032918	NA	NA	0	0	0	NA	NA	NA	NA	Yes	Adult_Cortex:Fetal_Cortex:Aorta:Left_Ventricle:IMR90:Mesenchymal_Stem_Cell	1.23057e-13	rs3211995:rs36232:rs12925669:rs11866815;rs12925669:rs11866815	191;192
ENSG00000269047	AC009041.2	16	1031252	1031663	NA	NA	0	0	0	NA	NA	NA	NA	Yes	Adult_Cortex:Fetal_Cortex	1.23057e-13	rs3211995	192
ENSG00000162066	AMDHD2	16	2570358	2581423	2.6425e-07	NA	0	0	0	NA	NA	NA	NA	Yes	Adult_Cortex:Fetal_Cortex	1.23057e-13	rs3211995:rs36232	192
ENSG00000162062	C16orf59	16	2510081	2514964	1.91728e-08	-0.265294	0	0	0	NA	NA	NA	NA	Yes	EP_links_oneway:Promoter_anchored_loops:Adult_Cortex:Fetal_Cortex	1.23057e-13	rs36232;rs3087631:rs36232:rs3211995	192
ENSG00000162063	CCNF	16	2479395	2508855	0.0243519	-1.09775	0	0	0	NA	NA	NA	NA	Yes	Adult_Cortex:Fetal_Cortex	1.23057e-13	rs3211995:rs36232	192
ENSG00000103249	CLCN7	16	1494935	1525581	0.981283	1.16861	0	0	0	NA	NA	NA	NA	Yes	Adult_Cortex:Fetal_Cortex	1.23057e-13	rs3211995:rs36232	192
ENSG00000184697	CLDN6	16	3064713	3070072	0.0104295	-0.6063	0	0	0	NA	NA	NA	NA	Yes	Adult_Cortex	1.23057e-13	rs3211995	192
ENSG00000167969	ECI1	16	2289396	2302301	4.20006e-10	0.338759	0	0	1	8.76066e-05	9.60451e-41	GTEx/v8/Muscle_Skeletal	NA	Yes	Adult_Cortex	1.23057e-13	rs36232;rs3211995	192
ENSG00000103254	FAM173A	16	770581	772601	0.00048241	NA	0	0	0	NA	NA	NA	NA	Yes	Fetal_Cortex	1.23057e-13	rs3211995:rs36232	192
ENSG00000162076	FLYWCH2	16	2933187	2949383	0.580537	1.7816	0	0	0	NA	NA	NA	NA	Yes	Fetal_Cortex	1.23057e-13	rs3211995:rs36232	192
ENSG00000127554	GFER	16	2034208	2037750	1.85055e-06	1.19122	0	0	1	7.87031e-05	0.00444962	GTEx/v8/Lung	NA	Yes	Adult_Cortex:Fetal_Cortex:Aorta:Left_Ventricle:IMR90:Mesenchymal_Stem_Cell	1.23057e-13	rs3087631;rs3211995:rs36232:rs12925669:rs11866815;rs12925669:rs11866815	191;192
ENSG00000103145	HCFC1R1	16	3072621	3074287	0.000463237	-0.487009	0	0	0	NA	NA	NA	NA	Yes	Adult_Cortex	1.23057e-13	rs3211995	192
ENSG00000103227	LMF1	16	903634	1031318	NA	-0.0530117	0	0	0	NA	NA	NA	NA	Yes	Adult_Cortex:Fetal_Cortex	1.23057e-13	rs3211995	192
ENSG00000103260	METRN	16	765115	769655	0.0818044	2.27939	0	0	0	NA	NA	NA	NA	Yes	Fetal_Cortex	1.23057e-13	rs3211995:rs36232	192
ENSG00000140990	NDUFB10	16	2009509	2011976	0.0466299	NA	0	0	0	NA	NA	NA	NA	Yes	Promoter_anchored_loops:Adult_Cortex:Fetal_Cortex:Aorta:Left_Ventricle:IMR90:Mesenchymal_Stem_Cell	1.23057e-13	rs3087631:rs3211995:rs2516740;rs3211995:rs2516740:rs36232:rs12925669:rs11866815;rs12925669:rs11866815	191;192
ENSG00000196408	NOXO1	16	2028918	2034193	3.17356e-11	0.0666416	0	0	0	NA	NA	NA	NA	Yes	Adult_Cortex:Fetal_Cortex:Aorta:Left_Ventricle:IMR90:Mesenchymal_Stem_Cell	1.23057e-13	rs3211995:rs36232:rs12925669:rs11866815;rs12925669:rs11866815	191;192
ENSG00000183971	NPW	16	2059927	2070756	NA	NA	0	0	0	NA	NA	NA	NA	Yes	EP_links_oneway:Promoter_anchored_loops	1.23057e-13	rs3211995:rs36232	192
ENSG00000095906	NUBP2	16	1832902	1839192	0.00881682	0.425218	0	0	0	NA	NA	NA	NA	Yes	Adult_Cortex:Fetal_Cortex	1.23057e-13	rs3211995:rs36232	192
ENSG00000179580	RNF151	16	2016824	2018976	3.79966e-07	0.239849	0	0	0	NA	NA	NA	NA	Yes	Adult_Cortex:Fetal_Cortex:Aorta:Left_Ventricle:IMR90:Mesenchymal_Stem_Cell	1.23057e-13	rs3211995:rs2516740;rs3211995:rs2516740:rs36232:rs12925669:rs11866815;rs12925669:rs11866815	191;192
ENSG00000140988	RPS2	16	2012053	2014861	0.236872	0.811835	0	0	0	NA	NA	NA	NA	Yes	Adult_Cortex:Fetal_Cortex:Aorta:Left_Ventricle:IMR90:Mesenchymal_Stem_Cell	1.23057e-13	rs3211995:rs2516740;rs3211995:rs2516740:rs36232:rs12925669:rs11866815;rs12925669:rs11866815	191;192
ENSG00000005513	SOX8	16	1031808	1036979	0.873708	0.408802	0	0	0	NA	NA	NA	NA	Yes	Adult_Cortex:Fetal_Cortex	1.23057e-13	rs3211995	192
ENSG00000183751	TBL3	16	2022038	2032934	1.53647e-06	1.03268	0	0	0	NA	NA	NA	NA	Yes	Adult_Cortex:Fetal_Cortex:Aorta:Left_Ventricle:IMR90:Mesenchymal_Stem_Cell	1.23057e-13	rs3211995:rs36232:rs12925669:rs11866815;rs12925669:rs11866815	191;192
ENSG00000131652	THOC6	16	3074028	3077756	0.00219345	-0.270753	0	0	0	NA	NA	NA	NA	Yes	Adult_Cortex	1.23057e-13	rs3211995	192
ENSG00000131653	TRAF7	16	2205699	2228130	0.460647	-1.21838	5	9.355	0	NA	NA	NA	NA	Yes	Promoter_anchored_loops:Adult_Cortex:Fetal_Cortex	1.23057e-13	rs36232;rs3087631:rs36232:rs3211995:rs2516740;rs3211995:rs2516740	192
ENSG00000167962	ZNF598	16	2047655	2059824	0.201673	NA	0	0	0	NA	NA	NA	NA	Yes	EP_links_oneway:Promoter_anchored_loops	1.23057e-13	rs3211995:rs36232	192
ENSG00000167283	ATP5L	11	118271869	118302211	0.337891	-0.416063	0	0	19	3.9871e-05	0.0339211	GTEx/v8/Nerve_Tibial	+	Yes	Fetal_Cortex:IMR90:Mesenchymal_Stem_Cell:hESC	1.32612e-13	rs3759012;rs1784460:rs3759012:rs664059:rs10488698:rs619054:rs10892063:rs6589574:rs2000571:rs180360;rs619054;rs10892019:rs180326	155;156
ENSG00000254873	RP11-770J1.5	11	118267810	118272610	NA	NA	0	0	0	NA	NA	NA	NA	Yes	Fetal_Cortex:IMR90:Mesenchymal_Stem_Cell:hESC	1.32612e-13	rs1784460:rs3759012:rs664059:rs10488698:rs619054:rs10892063:rs6589574:rs2000571:rs180360;rs619054;rs10892019:rs180326	155;156
ENSG00000048028	USP28	11	113668596	113746292	0.0316575	0.869552	0	0	0	NA	NA	NA	NA	Yes	Mesenchymal_Stem_Cell	1.32612e-13	rs480823:rs664059:rs2000571:rs180360;rs619054;rs10892019:rs10488698:rs180326	155
ENSG00000122786	CALD1	7	134429003	134655479	0.999098	-0.0733181	0	0	2	7.3739e-06	0.0452156	eQTLGen_trans_eQTLs	-	No	NA	1.33252e-13	rs7075195	138
ENSG00000158715	SLC45A3	1	205626979	205649587	0.0368495	0.153854	0	0	5	2.3969e-08	0.000331126	eQTLGen_trans_eQTLs	-	No	NA	1.56894e-13	rs442177;rs6589574	71;155
ENSG00000104447	TRPS1	8	116420724	116821899	0.990109	-0.347408	186	21.4	178	5.0062e-35	0	PsychENCODE_eQTLs:DICE/B_cell_naive:eQTLGen_cis_eQTLs:BIOSQTL/BIOS_eQTL_geneLevel:CMC_SVA_cis	-	No	NA	1.58009e-13	rs3808436;rs2721942	128
ENSG00000052749	RRP12	10	99116115	99161127	4.36448e-06	-0.568469	0	0	2	1.2854e-06	0.0102172	eQTLGen_trans_eQTLs	-	No	NA	1.5912e-13	rs4776981	186
ENSG00000154764	WNT7A	3	13857755	13921618	0.44126	1.72869	0	0	1	3.5384e-06	0.0249232	eQTLGen_trans_eQTLs	+	Yes	Fetal_Cortex	1.64698e-13	rs2726034;rs2569994	47;197
ENSG00000173727	AP000769.1	11	65222728	65234028	NA	NA	35	13.16	81	3.19866e-24	0	eQTLGen_cis_eQTLs:BIOSQTL/BIOS_eQTL_geneLevel:GTEx/v8/Adipose_Subcutaneous:GTEx/v8/Whole_Blood:GTEx/v8/Artery_Aorta:GTEx/v8/Artery_Tibial:GTEx/v8/Breast_Mammary_Tissue:GTEx/v8/Esophagus_Gastroesophageal_Junction:GTEx/v8/Esophagus_Mucosa:GTEx/v8/Esophagus_Muscularis:GTEx/v8/Heart_Atrial_Appendage:GTEx/v8/Heart_Left_Ventricle:GTEx/v8/Muscle_Skeletal:GTEx/v8/Nerve_Tibial:GTEx/v8/Cells_Cultured_fibro…	+	Yes	Promoter_anchored_loops:Adult_Cortex:Fetal_Cortex:Left_Ventricle:GM12878:IMR90:Mesenchymal_Stem_Cell	1.66311e-13	rs10896012;rs7946115;rs3814707;rs687672;rs10896012:rs630303:rs801733	152
ENSG00000175229	GAL3ST3	11	65809423	65816651	1.24669e-06	-0.117015	0	0	1	6.26492e-05	4.95095e-05	GTEx/v8/Pancreas	NA	Yes	Promoter_anchored_loops:Adult_Cortex:Fetal_Cortex	1.66311e-13	rs801733;rs10896012:rs630303:rs687672:rs801733	152
ENSG00000174903	RAB1B	11	66036004	66044963	0.751684	-0.263685	2	9.83	0	NA	NA	NA	NA	Yes	Adult_Cortex:Fetal_Cortex	1.66311e-13	rs801733;rs687672:rs801733	152
ENSG00000173039	RELA	11	65421067	65430565	0.998828	NA	0	0	4	2.4605e-07	0.00123025	eQTLcatalogue/Quach_2016_ge_monocyte_LPS:eQTLcatalogue/Quach_2016_ge_monocyte_Pam3CSK4:eQTLGen_cis_eQTLs	-	Yes	Promoter_anchored_loops:Adult_Cortex:Fetal_Cortex	1.66311e-13	rs3814707;rs557675;rs7946115:rs687672:rs630303:rs501630:rs801733	152
ENSG00000142186	SCYL1	11	65292548	65306175	0.00778441	NA	10	9.565	2	1.4866e-11	0	eQTLGen_cis_eQTLs:BIOSQTL/BIOS_eQTL_geneLevel	-	Yes	Promoter_anchored_loops:Adult_Cortex:Fetal_Cortex:GM12878	1.66311e-13	rs10896012;rs10896012:rs7946115:rs687672:rs501630:rs801733	152
ENSG00000087365	SF3B2	11	65818200	65836779	0.99946	-0.0687926	0	0	28	7.1482e-34	0	eQTLcatalogue/CEDAR_neutrophil_CD15:PsychENCODE_eQTLs:eQTLGen_cis_eQTLs:BIOSQTL/BIOS_eQTL_geneLevel:GTEx/v8/Whole_Blood:GTEx/v8/Artery_Aorta:GTEx/v8/Brain_Cerebellum:GTEx/v8/Colon_Sigmoid:GTEx/v8/Esophagus_Gastroesophageal_Junction:GTEx/v8/Esophagus_Muscularis:GTEx/v8/Heart_Atrial_Appendage:GTEx/v8/Lung:GTEx/v8/Muscle_Skeletal:GTEx/v8/Nerve_Tibial:GTEx/v8/Pancreas:GTEx/v8/Pituitary:GTEx/v8/Skin_N…	+	Yes	Promoter_anchored_loops:Adult_Cortex:Fetal_Cortex	1.66311e-13	rs801733;rs3814707;rs630303;rs501630;rs479315;rs7946115;rs557675;rs10896012:rs630303:rs687672:rs801733	152
[truncated: 2,729 more rows]

## Sheet: ST8
Supplementary Table 8. MAGMA gene-based analysis of MetS factor SNPs. Gene-based tests represent the aggregate effect of all SNPs in a gene.
[truncated: 17,707 more rows]

## Sheet: ST9
Supplementary Table 9. Overlap between FUMA positional mapping, FUMA eQTL mapping, FUMA chromatin interaction mapping and MAGMA gene-based analysis of MetS factor SNPs. ciMap, mapped by chromatin interaction mapping; ciMap tissue; tissue in which chromatin interaction mapping was observed; eqtlMapSNPs, mapped by expression quantitative traic locus mapping; eQTLMap tissue, tissue in which chromati…
[truncated: 329 more rows]

[truncated: 23 more sheets: ST10, ST11, ST12, ST13, ST14, ST15, ST16, ST17, ST18, ST19, ST20, ST21, ST22, ST23, ST24, ST25, ST26, ST27, ST28, ST29 …]
